# Supplementary material for: Sex-stratified multimorbidity trajectories in UK Biobank cohort identify triage rules for the risk of mortality and hospitalisation in secondary care
Source: Research Square preprint supplement (doi:10.21203/rs.3.rs-3909196/v1), 2024-02-06
Supplement: Supplementary file 1 [file 898ee91691add77fe7141231.xlsx]

## Sheet: 1. F Fast Slow Diagnoses
	Fast/Slow	Code	Name	Median diagnosis order	Median time to diagnosis	Coordinate of deviation from line of best fit
	Fast	N80-N98	Noninflamm.Dis.Fem.Genit.	2	0	>2sd
	Fast	N60-N64	Dis.Breast	2	0	>2sd
	Fast	N70-N77	Inflamm.Dis.Fem.Pelvic.Org.	3	0.8	>2sd
	Fast	D10-D36	Beni.Neop.	2	0.5	>1sd
	Fast	C50-C50	Malig.Neopl.Breast	2	1	>1sd
	Fast	L60-L75	Dis.Skin.App.	2	1	>1sd
	Fast	I26-I28	Pulmon.Heart.Dis.Pulmon.Circ.	6	6.5	>1sd
	Fast	J90-J94	Oth.Dis.Pleura	7	7.7	>1sd
	Fast	J95-J99	Oth.Dis.Respir.Sys.	8	8.8	>1sd
	Slow	F10-F19	Mental.Behav.Dis.Psycho.Subst.	4	8.7	<-2sd
	Slow	G40-G47	Episod.Paroxy.Dis.	3	5.3	<-1sd
	Slow	H30-H36	Dis.Chor.Retina	3	5.4	<-1sd
	Slow	E10-E14	Diab.Mell.	3	6	<-1sd
	Slow	H25-H28	Dis.Lens	3	6.3	<-1sd
	Slow	H40-H42	Glaucoma	4	6.7	<-1sd
	Slow	E70-E90	Metabolic.Dis.	4	6.9	<-1sd
	Slow	H90-H95	Oth.Dis.Ear	4	6.9	<-1sd
	Slow	F30-F39	Mood [Affective] Dis.	4	7.4	<-1sd
	Slow	F40-F48	Neurot.Stress.Somato.Dis.	5	8.7	<-1sd
	Slow	E65-E68	Obesity.Oth.Hyperalim.	5	8.9	<-1sd
	Supplementary Table 1. The classification of ICD10 block diagnoses as either belonging to fast or slow diagnosis trajectories for females. Determination is based on whether they appear earlier-in-order/later-in-time or later-in-order/earlier-in-time than expected. Here, we indicate whether blocks appear 1 or 2 standard deviations from the trend line in fast or slow directions.

## Sheet: 2. M Fast Slow Diagnoses
	Fast/Slow	Code	Name	Median diagnosis order	Median time to diagnosis	Coordinate of deviation from line of best fit
	Fast	L60-L75	Dis.Skin.App.	2	0	>2sd
	Fast	J30-J39	Oth.Dis.Upper.Respir.	2	0.3	>1sd
	Fast	N20-N23	Urolithiasis	2	0.9	>1sd
	Fast	K40-K46	Hernia	3	1.5	>1sd
	Fast	M20-M25	Oth.Joint.Dis.	3	1.8	>1sd
	Fast	I20-I25	Isch.Heart.Dis.	3	1.8	>1sd
	Fast	K20-K31	Dis.Oeso.Stom.Duod.	3	1.9	>1sd
	Fast	K50-K52	Noninfect.Enterit.Colit.	3	2.3	>1sd
	Fast	L00-L08	Infect.Skin.Subcut.Tiss.	4	3.2	>1sd
	Slow	F10-F19	Mental.Behav.Dis.Psycho.Subst.	3	5.8	<-2sd
	Slow	E65-E68	Obesity.Oth.Hyperalim.	5	7.9	<-2sd
	Slow	A00-A09	Intest.Infect.Dis.	5	7.9	<-2sd
	Slow	E10-E14	Diab.Mell.	2	3.8	<-1sd
	Slow	H25-H28	Dis.Lens	3	5.4	<-1sd
	Slow	E00-E07	Dis.Thyroid.Gla.	3	5.4	<-1sd
	Slow	H53-H54	Vis.Disturb.Blind.	4	5.7	<-1sd
	Slow	F30-F39	Mood [Affective] Dis.	4	6.1	<-1sd
	Slow	M45-M49	Spondylopathies	5	6.8	<-1sd
	Slow	F40-F48	Neurot.Stress.Somato.Dis.	5	6.9	<-1sd
	Slow	D50-D53	Nutrition.Anaem.	5	7.6	<-1sd
	Supplementary Table 2. The classification of ICD10 block diagnoses as either belonging to fast or slow diagnosis trajectories for males. Determination is based on whether they appear earlier-in-order/later-in-time or later-in-order/earlier-in-time than expected. Here, we indicate whether they appear 1 or 2 standard deviations away from the trend line in fast or slow directions.

## Sheet: 3. Cluster sex frequencies
Sex	Cluster	Size at Time 1	Size at Time 2	Size at Time 3	Size at Time 4	Cumulative size
Female	1	206	2527	5685	10815	42776
Female	2	140476	107083	77348	55798	652550
Female	3	10043	23758	33117	37256	185755
Female	4	5715	8776	12229	15355	77959
Female	5	5843	10513	14437	16792	138950
Female	6	5993	15619	25460	32260	132526
Male	1	284	3192	7090	12977	42776
Male	2	106703	76537	52282	36323	652550
Male	3	9151	19531	25462	27437	185755
Male	4	5545	8000	10286	12053	77959
Male	5	12401	20823	27506	30635	138950
Male	6	5269	11270	16727	19928	132526

## Sheet: 4. Cluster diagnosis prevalence
	Cluster	ICD10 code	Diagnosis	Frequency of cluster members with disease
	1	I10-I15	Hypertensive diseases	0.548883
	1	E70-E90	Metabolic disorders	0.528474
	1	K55-K64	Other diseases of intestines	0.474495
	1	J09-J18	Influenza and pneumonia	0.403778
	1	I30-I52	Other forms of heart disease	0.39286
	1	K20-K31	Diseases of oesophagus, stomach and duodenum	0.365462
	1	N17-N19	Renal failure	0.344562
	1	C76-C80	Malignant neoplasms of ill-defined, secondary and unspecified sites	0.32046
	1	J90-J94	Other diseases of pleura	0.316205
	1	A30-A49	Other bacterial diseases	0.311016
	1	J40-J47	Chronic lower respiratory diseases	0.306854
	1	B95-B98	Bacterial, viral and other infectious agents	0.296802
	1	N30-N39	Other diseases of urinary system	0.293669
	1	J95-J99	Other diseases of the respiratory system	0.285324
	1	D60-D64	Aplastic and other anaemias	0.272162
	1	I20-I25	Ischaemic heart diseases	0.254512
	1	K40-K46	Hernia	0.241444
	1	D70-D77	Other diseases of blood and blood-forming organs	0.223186
	1	I80-I89	Diseases of veins, lymphatic vessels and lymph nodes, not elsewhere classified	0.222625
	1	J20-J22	Other acute lower respiratory infections	0.21643
	1	M15-M19	Arthrosis	0.215962
	1	E10-E14	Diabetes mellitus	0.209907
	1	A00-A09	Intestinal infectious diseases	0.186577
	1	F10-F19	Mental and behavioural disorders due to psychoactive substance use	0.183935
	1	K50-K52	Noninfective enteritis and colitis	0.181457
	1	C15-C26	Malignant neoplasms of digestive organs	0.181434
	1	D10-D36	Benign neoplasms	0.179096
	1	I95-I99	Other and unspecified disorders of the circulatory system	0.175542
	1	M05-M14	Inflammatory polyarthropathies	0.173181
	1	K80-K87	Disorders of gallbladder, biliary tract and pancreas	0.166916
	1	K90-K93	Other diseases of the digestive system	0.166682
	1	M70-M79	Other soft tissue disorders	0.164064
	3	K20-K31	Diseases of oesophagus, stomach and duodenum	0.578439
	3	K55-K64	Other diseases of intestines	0.464558
	3	K40-K46	Hernia	0.420172
	3	D10-D36	Benign neoplasms	0.200528
	3	I80-I89	Diseases of veins, lymphatic vessels and lymph nodes, not elsewhere classified	0.195909
	3	I10-I15	Hypertensive diseases	0.192426
	3	K50-K52	Noninfective enteritis and colitis	0.167269
	4	H25-H28	Disorders of lens	0.691492
	4	I10-I15	Hypertensive diseases	0.337998
	4	H30-H36	Disorders of choroid and retina	0.31024
	4	H40-H42	Glaucoma	0.191665
	5	I10-I15	Hypertensive diseases	0.736344
	5	E70-E90	Metabolic disorders	0.58742
	5	I20-I25	Ischaemic heart diseases	0.527204
	5	I30-I52	Other forms of heart disease	0.37181
	5	E10-E14	Diabetes mellitus	0.245901
	5	K20-K31	Diseases of oesophagus, stomach and duodenum	0.173242
	5	K55-K64	Other diseases of intestines	0.158928
	6	M15-M19	Arthrosis	0.581735
	6	M20-M25	Other joint disorders	0.515831
	6	I10-I15	Hypertensive diseases	0.296153
	6	M70-M79	Other soft tissue disorders	0.292954
	6	M50-M54	Other dorsopathies	0.278979
	6	G50-G59	Nerve, nerve root and plexus disorders	0.236384
	6	M45-M49	Spondylopathies	0.200398
	6	M05-M14	Inflammatory polyarthropathies	0.199704
	6	K55-K64	Other diseases of intestines	0.176245
	6	K20-K31	Diseases of oesophagus, stomach and duodenum	0.17134

## Sheet: 5. Cluster Definitions
	Cluster	Definition	Name
	1	32 ICD10 blocks with greater than 15% prevalence from more than 5 ICD10 chapters	Complex, high morbidity
	2	0 ICD10 blocks with greater than 15% prevalence	Low morbidity
	3	4 out of 7 ICD10 blocks with greater than 15% prevalence are from the Diseases of the digestive system (K) ICD10 chapter	Digestive
	4	3 out of 4 ICD10 blocks with greater than 15% prevalence are from the Diseases of the eye and adnexa (H00-H59) ICD10 chapter	Eye
	5	5 out of 7 ICD10 blocks with greater than 15% prevalence are from the Diseases of the circulatory system (I00-I99) and Endocrine, nutritional and metabolic diseases (E00-E89) chapters	Cardiometabolic
	6	6 out of 10 ICD10 blocks with greater than 15% prevalence are from the Diseases of the musculoskeletal system and connective tissue (M00-M99) chapter	Musculoskeletal

## Sheet: 6. F diagnosis trajectories
	Diagnosis 1	Diagnosis 2	Diagnosis 3	Diagnosis 4	Diagnosis 5	Number of patients with trajectory	Median length of time of trajectory in years
	N80-N98	I80-I89	E65-E68	J90-J94	NA	31	15.2767
	N80-N98	G50-G59	E65-E68	N17-N19	NA	47	14.3205
	N80-N98	M50-M54	F30-F39	N17-N19	NA	88	14.1466
	N80-N98	M20-M25	D50-D53	N17-N19	NA	48	14.0562
	N80-N98	M50-M54	H25-H28	N17-N19	NA	79	13.9342
	N80-N98	I20-I25	E65-E68	N17-N19	NA	87	13.6822
	N80-N98	J40-J47	E65-E68	N17-N19	NA	102	13.5918
	N60-N64	K20-K31	M70-M79	A00-A09	NA	44	13.5466
	N80-N98	G50-G59	F30-F39	N17-N19	NA	43	13.4767
	N80-N98	K50-K52	M50-M54	J95-J99	NA	56	13.4233
	N80-N98	K20-K31	E65-E68	N17-N19	NA	147	13.3863
	N80-N98	M50-M54	E65-E68	N17-N19	NA	84	13.3671
	N80-N98	M20-M25	F30-F39	A00-A09	NA	101	13.3068
	N80-N98	I80-I89	F30-F39	N17-N19	NA	64	13.3014
	N80-N98	I80-I89	M50-M54	N17-N19	NA	105	13.2959
	N80-N98	I10-I15	E65-E68	N17-N19	NA	169	13.2712
	N80-N98	M20-M25	E65-E68	N17-N19	NA	74	13.2493
	N80-N98	M50-M54	I30-I52	N17-N19	NA	105	13.2301
	N80-N98	K50-K52	M50-M54	N17-N19	NA	83	13.2192
	E10-E14	I20-I25	H30-H36	N17-N19	NA	82	13.1575
	N80-N98	E00-E07	E65-E68	N17-N19	NA	68	13.1123
	N80-N98	K50-K52	M50-M54	A00-A09	NA	119	13.0959
	N80-N98	I10-I15	K65-K67	A00-A09	NA	57	13.0959
	N60-N64	J40-J47	A00-A09	NA	NA	67	13.0904
	N80-N98	M70-M79	E65-E68	N17-N19	NA	96	13.0795
	N80-N98	I10-I15	E65-E68	J90-J94	NA	49	13.0767
	N80-N98	M05-M14	D50-D53	N17-N19	NA	61	13.0712
	N80-N98	K20-K31	F30-F39	A00-A09	NA	172	13.0466
	N80-N98	K40-K46	E65-E68	N17-N19	NA	103	13.0411
	N80-N98	K20-K31	F30-F39	N17-N19	NA	140	12.9384
	N80-N98	K55-K64	E65-E68	A00-A09	NA	158	12.8959
	N80-N98	G50-G59	F30-F39	A00-A09	NA	63	12.8712
	N80-N98	I80-I89	F30-F39	J09-J18	NA	70	12.811
	N80-N98	J40-J47	F30-F39	N17-N19	NA	91	12.7452
	N80-N98	M50-M54	D50-D53	N17-N19	NA	57	12.7397
	N80-N98	K20-K31	F30-F39	J09-J18	NA	164	12.7356
	N80-N98	I80-I89	M50-M54	J95-J99	NA	69	12.7123
	N80-N98	I10-I15	D50-D53	N17-N19	NA	137	12.7096
	N60-N64	B95-B98	H25-H28	NA	NA	54	12.674
	N80-N98	K55-K64	F30-F39	A00-A09	NA	173	12.5863
	N80-N98	K55-K64	F30-F39	J09-J18	NA	153	12.5699
	N80-N98	I80-I89	E65-E68	N17-N19	NA	84	12.5425
	N80-N98	K80-K87	E65-E68	N17-N19	NA	64	12.5329
	L60-L75	M15-M19	J95-J99	NA	NA	45	12.526
	N80-N98	J40-J47	F30-F39	J95-J99	NA	76	12.5205
	N80-N98	K40-K46	F30-F39	A00-A09	NA	109	12.4849
	N80-N98	K55-K64	K65-K67	A00-A09	NA	82	12.4178
	N80-N98	M50-M54	N17-N19	NA	NA	357	12.3808
	N80-N98	K55-K64	E65-E68	N17-N19	NA	148	12.3767
	N80-N98	K50-K52	F30-F39	A00-A09	NA	97	12.3397
	N80-N98	K40-K46	F30-F39	N17-N19	NA	92	12.3342
	N80-N98	M15-M19	D50-D53	N17-N19	NA	83	12.3233
	N80-N98	K65-K67	I60-I69	NA	NA	48	12.2329
	N80-N98	M20-M25	F30-F39	N17-N19	NA	69	12.2192
	N80-N98	G50-G59	F30-F39	J09-J18	NA	66	12.2055
	N80-N98	J40-J47	F30-F39	A00-A09	NA	105	12.2027
	N80-N98	I80-I89	M50-M54	J09-J18	NA	88	12.1411
	N80-N98	K50-K52	F30-F39	N17-N19	NA	71	12.1014
	N80-N98	M50-M54	I26-I28	NA	NA	142	12.0822
	N80-N98	E65-E68	J90-J94	NA	NA	112	12.0822
	N80-N98	E10-E14	F40-F48	NA	NA	241	12.0575
	N80-N98	K55-K64	F30-F39	N17-N19	NA	140	12.026
	N80-N98	J30-J39	E65-E68	NA	NA	219	11.9863
	L60-L75	E10-E14	N17-N19	NA	NA	51	11.9808
	N80-N98	K55-K64	F30-F39	J95-J99	NA	111	11.9781
	N60-N64	L80-L99	A00-A09	NA	NA	49	11.9562
	N60-N64	L80-L99	H25-H28	NA	NA	67	11.9123
	N60-N64	J40-J47	N17-N19	NA	NA	71	11.8904
	N80-N98	M50-M54	J95-J99	NA	NA	220	11.8712
	N80-N98	M50-M54	J90-J94	NA	NA	166	11.863
	N80-N98	I20-I25	D50-D53	N17-N19	NA	71	11.8055
	N80-N98	M50-M54	A00-A09	NA	NA	457	11.7918
	N60-N64	M20-M25	F40-F48	NA	NA	75	11.7753
	N80-N98	I20-I25	F40-F48	NA	NA	344	11.7452
	L60-L75	G40-G47	N17-N19	NA	NA	33	11.7315
	N80-N98	H00-H06	F30-F39	NA	NA	187	11.7014
	N80-N98	G50-G59	F40-F48	NA	NA	314	11.689
	N80-N98	J30-J39	F30-F39	NA	NA	290	11.6685
	L60-L75	M70-M79	N17-N19	NA	NA	66	11.6452
	N80-N98	M50-M54	J09-J18	NA	NA	330	11.6247
	N80-N98	E65-E68	N17-N19	NA	NA	294	11.5534
	N80-N98	M20-M25	F40-F48	NA	NA	499	11.5315
	N60-N64	J40-J47	D50-D53	NA	NA	62	11.4918
	L60-L75	M15-M19	N17-N19	NA	NA	87	11.4575
	N80-N98	K00-K14	F40-F48	NA	NA	260	11.4055
	N80-N98	N10-N16	A00-A09	NA	NA	114	11.3973
	N60-N64	J40-J47	K90-K93	NA	NA	74	11.3932
	N80-N98	E00-E07	E65-E68	NA	NA	464	11.3877
	N80-N98	G50-G59	E65-E68	NA	NA	540	11.3767
	N80-N98	M50-M54	I95-I99	NA	NA	241	11.3616
	N80-N98	K80-K87	F40-F48	NA	NA	319	11.3589
	N60-N64	M70-M79	N17-N19	NA	NA	59	11.3562
	N80-N98	M50-M54	K70-K77	NA	NA	217	11.337
	E10-E14	H30-H36	J09-J18	NA	NA	112	11.3137
	N80-N98	M20-M25	F30-F39	NA	NA	837	11.2767
	N80-N98	E00-E07	F40-F48	NA	NA	317	11.263
	L60-L75	N30-N39	N17-N19	NA	NA	84	11.2205
	N80-N98	M50-M54	I60-I69	NA	NA	189	11.1808
	N80-N98	L80-L99	E65-E68	NA	NA	342	11.1192
	N80-N98	H00-H06	F40-F48	NA	NA	123	11.0904
	N80-N98	K00-K14	E65-E68	NA	NA	316	11.0671
	D10-D36	N30-N39	J90-J94	NA	NA	174	11.063
	N80-N98	M20-M25	E65-E68	NA	NA	813	11.0548
	N80-N98	E65-E68	A30-A49	NA	NA	123	11.0438
	N60-N64	J40-J47	M05-M14	NA	NA	144	11.0329
	D10-D36	M15-M19	D60-D64	A00-A09	NA	88	11.026
	K40-K46	M15-M19	D50-D53	N17-N19	NA	116	11.0205
	N80-N98	F30-F39	A00-A09	NA	NA	343	11.0164
	N80-N98	K20-K31	E65-E68	NA	NA	1232	11.0137
	N80-N98	J40-J47	E65-E68	NA	NA	742	10.9973
	N80-N98	I10-I15	F40-F48	NA	NA	813	10.989
	N80-N98	E65-E68	A00-A09	NA	NA	276	10.9877
	L60-L75	K55-K64	E70-E90	N17-N19	NA	56	10.9795
	N80-N98	M70-M79	F40-F48	NA	NA	541	10.9753
	I10-I15	M15-M19	I30-I52	N17-N19	NA	365	10.9699
	N80-N98	F30-F39	J95-J99	NA	NA	191	10.9644
	N80-N98	I10-I15	D50-D53	J95-J99	NA	79	10.9616
	N80-N98	M65-M68	F40-F48	NA	NA	131	10.9562
	N80-N98	M50-M54	I30-I52	NA	NA	629	10.9507
	N80-N98	M50-M54	H25-H28	NA	NA	531	10.9425
	N80-N98	M50-M54	F40-F48	NA	NA	485	10.9233
	N60-N64	M70-M79	A00-A09	NA	NA	86	10.9205
	N80-N98	K55-K64	F40-F48	NA	NA	1024	10.9123
	N70-N77	J30-J39	M15-M19	NA	NA	92	10.9068
	N80-N98	F30-F39	J09-J18	NA	NA	296	10.9027
	N60-N64	M20-M25	F10-F19	NA	NA	74	10.9014
	N80-N98	M15-M19	D50-D53	NA	NA	640	10.9
	N80-N98	M20-M25	D50-D53	NA	NA	446	10.9
	N80-N98	D50-D53	J95-J99	NA	NA	137	10.8932
	N80-N98	K50-K52	E65-E68	NA	NA	416	10.874
	N80-N98	K65-K67	A00-A09	NA	NA	133	10.874
	N60-N64	J40-J47	M45-M49	NA	NA	101	10.8575
	N80-N98	M50-M54	F30-F39	NA	NA	804	10.8548
	N80-N98	K20-K31	F30-F39	NA	NA	1499	10.8466
	N80-N98	D60-D64	A00-A09	NA	NA	327	10.8137
	N80-N98	G50-G59	F30-F39	NA	NA	594	10.8055
	I10-I15	I80-I89	I30-I52	N17-N19	NA	255	10.7945
	N80-N98	J40-J47	F40-F48	NA	NA	569	10.7918
	N80-N98	K00-K14	F30-F39	NA	NA	412	10.7849
	N60-N64	M50-M54	H25-H28	NA	NA	67	10.7644
	N80-N98	M50-M54	F10-F19	NA	NA	466	10.7575
	N80-N98	F30-F39	N17-N19	NA	NA	268	10.7575
	N80-N98	I80-I89	E65-E68	NA	NA	687	10.7452
	N80-N98	F30-F39	A30-A49	NA	NA	121	10.7452
	N80-N98	M70-M79	E65-E68	NA	NA	768	10.7425
	N60-N64	C76-C80	J90-J94	NA	NA	55	10.7397
	N80-N98	K20-K31	K65-K67	NA	NA	510	10.737
	N80-N98	J40-J47	F30-F39	NA	NA	871	10.7342
	L60-L75	M70-M79	A00-A09	NA	NA	82	10.7274
	N80-N98	M50-M54	K90-K93	NA	NA	507	10.7233
	N70-N77	K00-K14	M15-M19	NA	NA	122	10.7219
	N80-N98	K80-K87	E65-E68	NA	NA	579	10.7178
	N80-N98	M65-M68	F30-F39	NA	NA	214	10.7096
	N80-N98	K20-K31	F40-F48	NA	NA	954	10.7082
	N70-N77	M70-M79	M40-M43	NA	NA	51	10.7041
	N60-N64	J40-J47	E70-E90	NA	NA	198	10.6945
	L60-L75	E10-E14	A00-A09	NA	NA	47	10.6904
	N80-N98	I80-I89	F30-F39	NA	NA	806	10.6863
	L60-L75	M50-M54	A00-A09	NA	NA	64	10.6863
	N80-N98	I20-I25	E65-E68	NA	NA	462	10.6836
	E10-E14	H30-H36	A00-A09	NA	NA	112	10.6685
	N80-N98	K55-K64	F30-F39	NA	NA	1582	10.663
	N60-N64	K20-K31	K90-K93	NA	NA	137	10.663
	N80-N98	M50-M54	D50-D53	NA	NA	391	10.6575
	I10-I15	K20-K31	E70-E90	N17-N19	NA	584	10.626
	N80-N98	K40-K46	F30-F39	NA	NA	927	10.5945
	N80-N98	K40-K46	F40-F48	NA	NA	553	10.5945
	N80-N98	I20-I25	D50-D53	NA	NA	335	10.5562
	D10-D36	N30-N39	F40-F48	NA	NA	366	10.5521
	N80-N98	M50-M54	B95-B98	NA	NA	548	10.5356
	N60-N64	F30-F39	A00-A09	NA	NA	61	10.5342
	N80-N98	I10-I15	K65-K67	NA	NA	397	10.5233
	N70-N77	J30-J39	E70-E90	NA	NA	79	10.5178
	N80-N98	M50-M54	D60-D64	NA	NA	498	10.5068
	J30-J39	K40-K46	H25-H28	NA	NA	141	10.4822
	N80-N98	D50-D53	N17-N19	NA	NA	217	10.4767
	N80-N98	K55-K64	E65-E68	NA	NA	1299	10.474
	N80-N98	K40-K46	E65-E68	NA	NA	874	10.463
	N60-N64	J40-J47	H25-H28	NA	NA	106	10.4575
	N80-N98	K80-K87	D50-D53	NA	NA	327	10.4438
	D10-D36	M20-M25	E65-E68	NA	NA	479	10.4274
	N80-N98	K50-K52	F40-F48	NA	NA	344	10.426
	C50-C50	K55-K64	E70-E90	N17-N19	NA	92	10.426
	N80-N98	M20-M25	D60-D64	NA	NA	625	10.4164
	N60-N64	J40-J47	J95-J99	NA	NA	61	10.4
	L60-L75	E10-E14	F40-F48	NA	NA	31	10.3973
	N80-N98	K80-K87	D60-D64	NA	NA	418	10.3767
	I10-I15	M15-M19	H25-H28	N17-N19	NA	294	10.3603
	N60-N64	J40-J47	J09-J18	NA	NA	82	10.3575
	N80-N98	J30-J39	M50-M54	NA	NA	362	10.3411
	N80-N98	I10-I15	E65-E68	NA	NA	1324	10.3315
	N60-N64	J40-J47	I30-I52	NA	NA	127	10.3315
	N80-N98	K50-K52	F30-F39	NA	NA	561	10.3233
	D10-D36	N30-N39	H25-H28	NA	NA	542	10.3233
	J30-J39	E65-E68	N17-N19	NA	NA	46	10.3233
	I10-I15	K40-K46	E70-E90	N17-N19	NA	389	10.3151
	E10-E14	N30-N39	H30-H36	NA	NA	225	10.3096
	N60-N64	M20-M25	M80-M85	NA	NA	89	10.3096
	D10-D36	N30-N39	E65-E68	NA	NA	457	10.2904
	E10-E14	G50-G59	H30-H36	NA	NA	179	10.2877
	N80-N98	M15-M19	D60-D64	NA	NA	827	10.2849
	M20-M25	K40-K46	H40-H42	NA	NA	116	10.2822
	N80-N98	M05-M14	D50-D53	NA	NA	375	10.274
	D10-D36	M70-M79	E65-E68	NA	NA	503	10.2685
	N60-N64	K20-K31	M70-M79	NA	NA	306	10.2589
	N60-N64	F30-F39	J09-J18	NA	NA	49	10.2384
	N80-N98	L80-L99	D50-D53	NA	NA	222	10.2356
	K50-K52	M65-M68	J90-J94	NA	NA	36	10.2274
	I10-I15	I80-I89	E70-E90	N17-N19	NA	330	10.2192
	I10-I15	K50-K52	E65-E68	N17-N19	NA	122	10.2192
	N80-N98	I10-I15	D50-D53	NA	NA	822	10.1973
	N60-N64	F30-F39	N17-N19	NA	NA	40	10.1932
	K80-K87	M70-M79	N17-N19	NA	NA	247	10.189
	C50-C50	K55-K64	E70-E90	J95-J99	NA	55	10.1808
	L60-L75	M15-M19	J09-J18	NA	NA	85	10.1753
	N60-N64	C76-C80	N17-N19	NA	NA	41	10.1726
	N80-N98	E00-E07	D60-D64	NA	NA	439	10.1589
	N80-N98	G50-G59	D50-D53	NA	NA	306	10.1466
	N80-N98	M50-M54	E65-E68	NA	NA	644	10.1342
	G50-G59	K40-K46	H40-H42	NA	NA	80	10.1274
	K50-K52	M20-M25	N17-N19	NA	NA	238	10.1247
	N80-N98	K00-K14	D50-D53	NA	NA	214	10.1137
	C50-C50	N30-N39	N17-N19	NA	NA	139	10.1014
	L60-L75	M70-M79	I30-I52	NA	NA	112	10.0795
	L60-L75	M20-M25	A00-A09	NA	NA	88	10.074
	D10-D36	N30-N39	J95-J99	NA	NA	222	10.0712
	N80-N98	D50-D53	C76-C80	NA	NA	142	10.0438
	L60-L75	E10-E14	H25-H28	NA	NA	87	10.0411
	N80-N98	J40-J47	D60-D64	NA	NA	616	10.0315
	N80-N98	I20-I25	D60-D64	NA	NA	427	10.0247
	N80-N98	K50-K52	D60-D64	NA	NA	491	10.0219
	E10-E14	I20-I25	H30-H36	NA	NA	247	10.0164
	L60-L75	M15-M19	A00-A09	NA	NA	101	10.0164
	L60-L75	M05-M14	A00-A09	NA	NA	61	10.0164
	L60-L75	N30-N39	A00-A09	NA	NA	86	9.98904
	L60-L75	M15-M19	H25-H28	NA	NA	192	9.98219
	D10-D36	N30-N39	F30-F39	NA	NA	596	9.96986
	D10-D36	N30-N39	M45-M49	NA	NA	495	9.96712
	L60-L75	M70-M79	J95-J99	NA	NA	49	9.96164
	D10-D36	N30-N39	A00-A09	NA	NA	419	9.95616
	I80-I89	K40-K46	H25-H28	NA	NA	598	9.94795
	L60-L75	N30-N39	I30-I52	NA	NA	123	9.94247
	G50-G59	I20-I25	I95-I99	NA	NA	121	9.93425
	L60-L75	M50-M54	H25-H28	NA	NA	85	9.93151
	J30-J39	K55-K64	N17-N19	NA	NA	170	9.92329
	N80-N98	G50-G59	D60-D64	NA	NA	390	9.9137
	I10-I15	M15-M19	D50-D53	N17-N19	NA	215	9.91233
	C50-C50	K55-K64	D70-D77	J09-J18	NA	37	9.89863
	N80-N98	I80-I89	M50-M54	NA	NA	994	9.87808
	D10-D36	B95-B98	H25-H28	NA	NA	300	9.87671
	N70-N77	G50-G59	K55-K64	NA	NA	258	9.87397
	N80-N98	I10-I15	D60-D64	NA	NA	1087	9.86027
	J40-J47	H25-H28	I95-I99	NA	NA	161	9.85479
	D10-D36	N30-N39	M80-M85	NA	NA	399	9.82466
	N70-N77	M20-M25	K55-K64	NA	NA	422	9.82055
	I10-I15	K55-K64	E70-E90	N17-N19	NA	643	9.81644
	D10-D36	N30-N39	M70-M79	NA	NA	854	9.81096
	J30-J39	E70-E90	N17-N19	NA	NA	142	9.8
	N80-N98	M70-M79	D50-D53	NA	NA	459	9.79726
	N70-N77	K55-K64	E70-E90	NA	NA	481	9.78356
	J30-J39	M15-M19	N17-N19	NA	NA	118	9.78356
	N80-N98	K55-K64	K65-K67	NA	NA	594	9.77808
	L60-L75	E70-E90	N17-N19	NA	NA	100	9.77534
	D10-D36	M15-M19	B95-B98	NA	NA	564	9.76027
	E10-E14	M70-M79	H30-H36	NA	NA	202	9.75616
	N80-N98	D50-D53	A30-A49	NA	NA	112	9.74521
	D10-D36	N30-N39	M05-M14	NA	NA	681	9.74247
	N80-N98	M70-M79	D60-D64	NA	NA	630	9.71644
	N60-N64	M70-M79	H25-H28	NA	NA	108	9.71644
	N80-N98	C51-C58	K90-K93	NA	NA	103	9.70411
	I10-I15	K50-K52	E70-E90	N17-N19	NA	288	9.70274
	M20-M25	K40-K46	H25-H28	NA	NA	580	9.69315
	D10-D36	N30-N39	F10-F19	NA	NA	353	9.69041
	I20-I25	H30-H36	N17-N19	NA	NA	178	9.69041
	D10-D36	E65-E68	A30-A49	NA	NA	74	9.68767
	L60-L75	M70-M79	H25-H28	NA	NA	89	9.67945
	D10-D36	N30-N39	N17-N19	NA	NA	396	9.67534
	J30-J39	I30-I52	N17-N19	NA	NA	92	9.6726
	N60-N64	J40-J47	D60-D64	NA	NA	83	9.67123
	D10-D36	N30-N39	M15-M19	NA	NA	1227	9.66575
	D10-D36	K65-K67	A00-A09	NA	NA	93	9.66575
	N80-N98	C51-C58	J20-J22	NA	NA	73	9.65479
	L60-L75	K55-K64	E70-E90	NA	NA	425	9.65205
	N70-N77	K55-K64	N17-N19	NA	NA	152	9.65068
	D10-D36	N30-N39	M20-M25	NA	NA	913	9.64658
	N80-N98	M65-M68	D60-D64	NA	NA	191	9.64658
	D10-D36	N30-N39	L00-L08	NA	NA	271	9.6411
	N80-N98	K50-K52	M50-M54	NA	NA	700	9.60822
	G50-G59	I20-I25	N17-N19	NA	NA	217	9.56164
	N80-N98	M50-M54	A30-A49	NA	NA	171	9.56164
	M65-M68	E70-E90	N17-N19	NA	NA	143	9.5589
	N30-N39	G50-G59	H25-H28	NA	NA	351	9.55342
	D10-D36	N30-N39	I30-I52	NA	NA	615	9.55068
	K20-K31	M50-M54	H25-H28	NA	NA	793	9.54795
	I80-I89	M20-M25	F10-F19	NA	NA	267	9.51233
	D10-D36	N30-N39	M40-M43	NA	NA	162	9.51233
	I80-I89	M20-M25	J90-J94	NA	NA	133	9.50959
	K50-K52	K00-K14	N17-N19	NA	NA	137	9.50411
	N30-N39	M20-M25	H25-H28	NA	NA	546	9.49863
	E10-E14	H25-H28	A00-A09	NA	NA	223	9.49315
	N30-N39	G50-G59	J90-J94	NA	NA	105	9.49315
	K50-K52	M70-M79	N17-N19	NA	NA	268	9.48356
	K20-K31	M70-M79	N17-N19	NA	NA	610	9.46849
	I80-I89	M70-M79	N17-N19	NA	NA	347	9.46575
	K50-K52	K40-K46	N17-N19	NA	NA	320	9.45753
	K50-K52	M50-M54	H25-H28	NA	NA	236	9.43973
	I80-I89	M50-M54	F10-F19	NA	NA	260	9.43014
	L60-L75	N30-N39	H25-H28	NA	NA	101	9.41644
	E10-E14	H25-H28	N17-N19	NA	NA	415	9.40822
	I20-I25	B95-B98	H25-H28	NA	NA	314	9.40137
	I80-I89	K40-K46	F10-F19	NA	NA	334	9.39589
	E10-E14	L80-L99	N17-N19	NA	NA	224	9.38082
	I10-I15	H30-H36	J09-J18	NA	NA	182	9.37671
	K20-K31	M05-M14	M40-M43	NA	NA	307	9.37534
	N30-N39	G50-G59	J95-J99	NA	NA	146	9.36712
	J40-J47	F30-F39	A30-A49	NA	NA	144	9.36301
	I10-I15	M70-M79	N17-N19	NA	NA	814	9.36164
	N60-N64	M20-M25	F30-F39	NA	NA	115	9.3589
	E10-E14	B95-B98	H25-H28	NA	NA	314	9.35479
	C50-C50	L80-L99	A00-A09	NA	NA	80	9.33836
	G50-G59	K40-K46	N17-N19	NA	NA	236	9.33562
	D10-D36	M15-M19	D60-D64	NA	NA	586	9.33151
	D10-D36	D60-D64	A00-A09	NA	NA	245	9.33151
	E10-E14	N30-N39	N17-N19	NA	NA	446	9.31644
	C50-C50	K55-K64	M80-M85	NA	NA	308	9.31644
	I20-I25	H25-H28	N17-N19	NA	NA	383	9.30137
	N30-N39	G50-G59	I95-I99	NA	NA	174	9.3
	I10-I15	G40-G47	N17-N19	NA	NA	388	9.2863
	K80-K87	M15-M19	N17-N19	NA	NA	331	9.28493
	I80-I89	M20-M25	N17-N19	NA	NA	290	9.27671
	K50-K52	K40-K46	L00-L08	NA	NA	233	9.27123
	C50-C50	K55-K64	J09-J18	NA	NA	214	9.26712
	L60-L75	M70-M79	J09-J18	NA	NA	81	9.26575
	D10-D36	N30-N39	G50-G59	NA	NA	571	9.25205
	M65-M68	M45-M49	A00-A09	NA	NA	83	9.22466
	J40-J47	H30-H36	J09-J18	NA	NA	117	9.22192
	K50-K52	M05-M14	A00-A09	NA	NA	325	9.2137
	M65-M68	M45-M49	N17-N19	NA	NA	64	9.19041
	D10-D36	E65-E68	N17-N19	NA	NA	201	9.18904
	G50-G59	G40-G47	I95-I99	NA	NA	68	9.18767
	N80-N98	C51-C58	I95-I99	NA	NA	64	9.18493
	H00-H06	M15-M19	J95-J99	NA	NA	65	9.18356
	N30-N39	G50-G59	M05-M14	NA	NA	551	9.17534
	I80-I89	M20-M25	J09-J18	NA	NA	265	9.16986
	I80-I89	K40-K46	M80-M85	NA	NA	468	9.16164
	K50-K52	G40-G47	J09-J18	NA	NA	126	9.15205
	K50-K52	G50-G59	M80-M85	NA	NA	177	9.14247
	I80-I89	M70-M79	H25-H28	NA	NA	450	9.1274
	D10-D36	C15-C26	N17-N19	NA	NA	86	9.1137
	I80-I89	K40-K46	N17-N19	NA	NA	374	9.11233
	J40-J47	H30-H36	N17-N19	NA	NA	132	9.10685
	M20-M25	K40-K46	N17-N19	NA	NA	362	9.10274
	I10-I15	K40-K46	N17-N19	NA	NA	981	9.09863
	K80-K87	M05-M14	N17-N19	NA	NA	234	9.09726
	J40-J47	H30-H36	J95-J99	NA	NA	79	9.09041
	M20-M25	K55-K64	N17-N19	NA	NA	585	9.08493
	L60-L75	M15-M19	D60-D64	NA	NA	100	9.08219
	E10-E14	M05-M14	N17-N19	NA	NA	348	9.07123
	N60-N64	C76-C80	A00-A09	NA	NA	41	9.07123
	N80-N98	D60-D64	A30-A49	NA	NA	222	9.06027
	G50-G59	I20-I25	H25-H28	NA	NA	284	9.0589
	L60-L75	E70-E90	J95-J99	NA	NA	63	9.05753
	J40-J47	L00-L08	H25-H28	NA	NA	232	9.05479
	J40-J47	I60-I69	J09-J18	NA	NA	195	9.05479
	I80-I89	K40-K46	J09-J18	NA	NA	351	9.05205
	N30-N39	G50-G59	N17-N19	NA	NA	251	9.04932
	K50-K52	M65-M68	N17-N19	NA	NA	68	9.04795
	C50-C50	N30-N39	J09-J18	NA	NA	144	9.04521
	I10-I15	L80-L99	N17-N19	NA	NA	532	9.04247
	I80-I89	K40-K46	I95-I99	NA	NA	234	9.03562
	H00-H06	F10-F19	J95-J99	NA	NA	32	9.02603
	D10-D36	N30-N39	J20-J22	NA	NA	310	9.02055
	M20-M25	K40-K46	J90-J94	NA	NA	151	9.01644
	I10-I15	N30-N39	N17-N19	NA	NA	1046	9.01096
	L60-L75	E70-E90	A00-A09	NA	NA	107	9.01096
	I80-I89	M15-M19	H25-H28	NA	NA	805	8.99452
	N30-N39	G50-G59	J09-J18	NA	NA	249	8.98904
	G50-G59	K55-K64	J95-J99	NA	NA	222	8.98904
	G50-G59	K40-K46	H25-H28	NA	NA	373	8.9863
	D10-D36	N30-N39	K90-K93	NA	NA	432	8.98356
	K20-K31	M15-M19	N17-N19	NA	NA	911	8.97534
	G50-G59	M15-M19	N17-N19	NA	NA	363	8.9726
	K50-K52	H53-H54	J09-J18	NA	NA	63	8.96712
	K50-K52	K40-K46	M80-M85	NA	NA	386	8.96438
	D10-D36	C15-C26	I95-I99	NA	NA	52	8.96027
	D10-D36	N30-N39	J09-J18	NA	NA	354	8.95616
	M70-M79	I30-I52	I95-I99	NA	NA	228	8.95342
	M20-M25	L00-L08	N17-N19	NA	NA	151	8.94795
	K50-K52	G40-G47	N17-N19	NA	NA	146	8.94521
	N80-N98	C51-C58	A00-A09	NA	NA	105	8.94521
	D10-D36	N30-N39	I95-I99	NA	NA	227	8.94247
	K40-K46	M15-M19	N17-N19	NA	NA	573	8.93973
	K50-K52	M50-M54	N17-N19	NA	NA	244	8.93699
	I80-I89	K40-K46	J95-J99	NA	NA	234	8.93014
	N30-N39	M65-M68	A00-A09	NA	NA	105	8.92877
	N30-N39	M15-M19	N17-N19	NA	NA	618	8.92466
	E10-E14	E65-E68	N17-N19	NA	NA	329	8.91233
	N30-N39	K40-K46	N17-N19	NA	NA	499	8.90685
	I20-I25	H25-H28	I95-I99	NA	NA	192	8.90274
	M20-M25	M05-M14	D70-D77	NA	NA	142	8.90274
	G50-G59	K55-K64	H40-H42	NA	NA	115	8.89041
	N30-N39	M70-M79	N17-N19	NA	NA	464	8.88904
	K50-K52	M05-M14	N17-N19	NA	NA	279	8.88219
	G50-G59	K55-K64	N17-N19	NA	NA	353	8.87397
	I80-I89	M70-M79	I95-I99	NA	NA	204	8.87123
	E10-E14	L00-L08	N17-N19	NA	NA	208	8.86438
	I10-I15	I60-I69	J09-J18	NA	NA	281	8.86027
	K20-K31	K80-K87	M80-M85	NA	NA	531	8.85753
	I10-I15	H30-H36	I95-I99	NA	NA	137	8.85205
	G50-G59	K55-K64	I26-I28	NA	NA	121	8.85205
	K50-K52	K00-K14	M45-M49	NA	NA	152	8.84247
	G50-G59	M15-M19	I95-I99	NA	NA	209	8.83836
	D10-D36	E65-E68	A00-A09	NA	NA	189	8.82466
	D10-D36	C15-C26	J90-J94	NA	NA	70	8.8137
	K50-K52	M80-M85	A00-A09	NA	NA	229	8.80274
	G50-G59	K40-K46	I30-I52	NA	NA	394	8.8
	K50-K52	K40-K46	M15-M19	NA	NA	951	8.79726
	M20-M25	K55-K64	M80-M85	NA	NA	810	8.79315
	N60-N64	F10-F19	NA	NA	NA	383	8.78904
	I10-I15	M15-M19	N17-N19	NA	NA	1221	8.78356
	L60-L75	M15-M19	I95-I99	NA	NA	59	8.78082
	M20-M25	K55-K64	K70-K77	NA	NA	320	8.77808
	I10-I15	H30-H36	N17-N19	NA	NA	333	8.77534
	K20-K31	M05-M14	N17-N19	NA	NA	642	8.76849
	I10-I15	K55-K64	N17-N19	NA	NA	1586	8.76712
	I80-I89	M50-M54	J09-J18	NA	NA	255	8.76712
	D10-D36	D37-D48	J90-J94	NA	NA	57	8.76712
	G50-G59	M15-M19	J90-J94	NA	NA	132	8.76575
	K80-K87	E65-E68	N17-N19	NA	NA	202	8.76301
	J40-J47	L00-L08	A00-A09	NA	NA	188	8.75479
	K20-K31	M70-M79	K70-K77	NA	NA	351	8.74521
	K50-K52	M70-M79	H25-H28	NA	NA	304	8.74384
	N30-N39	M65-M68	J09-J18	NA	NA	87	8.73425
	I10-I15	M05-M14	N17-N19	NA	NA	819	8.72877
	K00-K14	M15-M19	N17-N19	NA	NA	215	8.72603
	E10-E14	D50-D53	J95-J99	NA	NA	109	8.72603
	K40-K46	I60-I69	J09-J18	NA	NA	150	8.72466
	J40-J47	K40-K46	J20-J22	NA	NA	509	8.71781
	K20-K31	M70-M79	M40-M43	NA	NA	324	8.71644
	K20-K31	K80-K87	D50-D53	NA	NA	471	8.70959
	I80-I89	M70-M79	F10-F19	NA	NA	303	8.70685
	I80-I89	M70-M79	J09-J18	NA	NA	346	8.70274
	K80-K87	M15-M19	H25-H28	NA	NA	531	8.69863
	K50-K52	K40-K46	H25-H28	NA	NA	371	8.69863
	K20-K31	K80-K87	N17-N19	NA	NA	500	8.69726
	N80-N98	C51-C58	N17-N19	NA	NA	109	8.68219
	J40-J47	M45-M49	N17-N19	NA	NA	287	8.67945
	M20-M25	M05-M14	N17-N19	NA	NA	406	8.66301
	K50-K52	M15-M19	N17-N19	NA	NA	365	8.66301
	K50-K52	K40-K46	M40-M43	NA	NA	90	8.66164
	K20-K31	E65-E68	N17-N19	NA	NA	413	8.66027
	K20-K31	K80-K87	H25-H28	NA	NA	737	8.65205
	K50-K52	K40-K46	M05-M14	NA	NA	573	8.64658
	H00-H06	M05-M14	J95-J99	NA	NA	52	8.63836
	N60-N64	F40-F48	NA	NA	NA	340	8.63699
	D10-D36	D37-D48	J09-J18	NA	NA	77	8.63014
	G50-G59	M15-M19	J09-J18	NA	NA	310	8.6274
	K20-K31	M45-M49	N17-N19	NA	NA	452	8.62055
	I10-I15	H25-H28	J90-J94	NA	NA	271	8.61918
	G50-G59	K55-K64	H25-H28	NA	NA	601	8.61644
	N80-N98	C15-C26	D60-D64	NA	NA	175	8.61644
	K40-K46	H25-H28	N17-N19	NA	NA	338	8.60548
	D10-D36	D37-D48	N17-N19	NA	NA	79	8.60548
	I10-I15	I80-I89	I30-I52	NA	NA	1223	8.60274
	E10-E14	I30-I52	N17-N19	NA	NA	460	8.59589
	G50-G59	M15-M19	J95-J99	NA	NA	216	8.59452
	I80-I89	M15-M19	N17-N19	NA	NA	462	8.58904
	N30-N39	M20-M25	M45-M49	NA	NA	695	8.58082
	N30-N39	K40-K46	M45-M49	NA	NA	629	8.58082
	I80-I89	M20-M25	J95-J99	NA	NA	175	8.58082
	G50-G59	I20-I25	J90-J94	NA	NA	85	8.58082
	I80-I89	M50-M54	N17-N19	NA	NA	282	8.57808
	C50-C50	K55-K64	E70-E90	NA	NA	636	8.5726
	J40-J47	I30-I52	A00-A09	NA	NA	361	8.56438
	I10-I15	H25-H28	N17-N19	NA	NA	794	8.56301
	J40-J47	F30-F39	J09-J18	NA	NA	382	8.55616
	E10-E14	D50-D53	N17-N19	NA	NA	295	8.55342
	M20-M25	E70-E90	J95-J99	NA	NA	311	8.55068
	J40-J47	M70-M79	J20-J22	NA	NA	476	8.54795
	I10-I15	H30-H36	J90-J94	NA	NA	94	8.53836
	I80-I89	F30-F39	J95-J99	NA	NA	155	8.53425
	M20-M25	F30-F39	J09-J18	NA	NA	224	8.52603
	I10-I15	K50-K52	E65-E68	NA	NA	555	8.52329
	I80-I89	M20-M25	I95-I99	NA	NA	200	8.51096
	J40-J47	H25-H28	A00-A09	NA	NA	254	8.50548
	I80-I89	M50-M54	J95-J99	NA	NA	174	8.50137
	K20-K31	F30-F39	J95-J99	NA	NA	293	8.48767
	J40-J47	M05-M14	N17-N19	NA	NA	453	8.48493
	G50-G59	F30-F39	N17-N19	NA	NA	131	8.48493
	C50-C50	L80-L99	H25-H28	NA	NA	117	8.48219
	I80-I89	M15-M19	J09-J18	NA	NA	391	8.47945
	N30-N39	M20-M25	J90-J94	NA	NA	178	8.47808
	C50-C50	N30-N39	I95-I99	NA	NA	96	8.46575
	J40-J47	F30-F39	N17-N19	NA	NA	291	8.46301
	K20-K31	M15-M19	M40-M43	NA	NA	488	8.46164
	N30-N39	M05-M14	N17-N19	NA	NA	437	8.45479
	I80-I89	M50-M54	H25-H28	NA	NA	385	8.45205
	I10-I15	N30-N39	J09-J18	NA	NA	813	8.44932
	J40-J47	E70-E90	A00-A09	NA	NA	641	8.44932
	M50-M54	I60-I69	J09-J18	NA	NA	108	8.43699
	K50-K52	M15-M19	H25-H28	NA	NA	475	8.43562
	K50-K52	E65-E68	N17-N19	NA	NA	172	8.43562
	G50-G59	M15-M19	H25-H28	NA	NA	671	8.43014
	M65-M68	E70-E90	A00-A09	NA	NA	119	8.43014
	I10-I15	B95-B98	H25-H28	NA	NA	657	8.4274
	K50-K52	F30-F39	J95-J99	NA	NA	134	8.42055
	K40-K46	M15-M19	D50-D53	NA	NA	675	8.4137
	K50-K52	I60-I69	J09-J18	NA	NA	117	8.4137
	K50-K52	G50-G59	M05-M14	NA	NA	352	8.40411
	D10-D36	C15-C26	J09-J18	NA	NA	94	8.39863
	M20-M25	M05-M14	J90-J94	NA	NA	154	8.39726
	K40-K46	E65-E68	N17-N19	NA	NA	291	8.3863
	I20-I25	E65-E68	N17-N19	NA	NA	282	8.3726
	I10-I15	E65-E68	J90-J94	NA	NA	179	8.36712
	J40-J47	F30-F39	J95-J99	NA	NA	270	8.36301
	I10-I15	E65-E68	N17-N19	NA	NA	589	8.36164
	M70-M79	I60-I69	J09-J18	NA	NA	135	8.36164
	N60-N64	C76-C80	J20-J22	NA	NA	49	8.35068
	K50-K52	I30-I52	N17-N19	NA	NA	322	8.34658
	K50-K52	F30-F39	N17-N19	NA	NA	189	8.34521
	K50-K52	G50-G59	N17-N19	NA	NA	160	8.34384
	I80-I89	M15-M19	D50-D53	NA	NA	471	8.34247
	I10-I15	M45-M49	N17-N19	NA	NA	560	8.33836
	G50-G59	M05-M14	J09-J18	NA	NA	218	8.33288
	K20-K31	I60-I69	J09-J18	NA	NA	241	8.33151
	I80-I89	M05-M14	N17-N19	NA	NA	327	8.32603
	I80-I89	M15-M19	J95-J99	NA	NA	274	8.31918
	I10-I15	H25-H28	I95-I99	NA	NA	350	8.30959
	I80-I89	M70-M79	J95-J99	NA	NA	235	8.30411
	C50-C50	K00-K14	E70-E90	NA	NA	155	8.30411
	K20-K31	K80-K87	K90-K93	NA	NA	621	8.30137
	L60-L75	M70-M79	D60-D64	NA	NA	81	8.30137
	J40-J47	E70-E90	N17-N19	NA	NA	699	8.29863
	M20-M25	K55-K64	M45-M49	NA	NA	1190	8.29589
	K50-K52	G50-G59	I60-I69	NA	NA	82	8.29589
	K55-K64	I60-I69	J09-J18	NA	NA	254	8.29315
	N80-N98	C51-C58	I30-I52	NA	NA	142	8.29315
	C50-C50	K55-K64	J90-J94	NA	NA	182	8.28082
	K50-K52	E70-E90	N17-N19	NA	NA	495	8.27671
	I10-I15	H25-H28	A00-A09	NA	NA	510	8.27397
	M20-M25	K55-K64	M40-M43	NA	NA	383	8.27123
	D10-D36	D37-D48	C76-C80	NA	NA	120	8.26712
	N80-N98	F40-F48	NA	NA	NA	2553	8.26301
	H00-H06	E70-E90	N17-N19	NA	NA	134	8.25616
	C50-C50	K40-K46	M80-M85	NA	NA	175	8.25205
	I10-I15	N30-N39	I95-I99	NA	NA	515	8.24932
	K40-K46	M45-M49	N17-N19	NA	NA	277	8.24658
	J40-J47	M15-M19	J20-J22	NA	NA	589	8.2411
	K50-K52	H25-H28	J95-J99	NA	NA	108	8.2411
	M20-M25	E70-E90	N17-N19	NA	NA	562	8.23973
	K20-K31	M45-M49	J95-J99	NA	NA	231	8.23562
	H00-H06	E70-E90	A00-A09	NA	NA	127	8.2274
	D10-D36	N30-N39	L80-L99	NA	NA	449	8.22466
	I10-I15	N30-N39	J20-J22	NA	NA	672	8.21644
	K20-K31	M80-M85	A00-A09	NA	NA	392	8.21233
	G50-G59	K55-K64	J09-J18	NA	NA	333	8.21096
	G50-G59	K55-K64	I95-I99	NA	NA	221	8.21096
	I10-I15	M05-M14	A00-A09	NA	NA	624	8.20822
	J40-J47	B95-B98	H25-H28	NA	NA	394	8.20822
	I10-I15	M15-M19	H25-H28	NA	NA	1738	8.20411
	M20-M25	I30-I52	N17-N19	NA	NA	317	8.2
	K50-K52	K40-K46	M45-M49	NA	NA	370	8.19726
	K20-K31	I30-I52	A00-A09	NA	NA	538	8.19315
	E10-E14	L00-L08	A00-A09	NA	NA	138	8.19315
	K20-K31	F30-F39	N17-N19	NA	NA	417	8.19178
	N80-N98	C76-C80	D60-D64	NA	NA	388	8.19041
	I10-I15	H25-H28	A30-A49	NA	NA	277	8.18904
	M70-M79	I30-I52	N17-N19	NA	NA	411	8.1863
	I10-I15	H25-H28	J09-J18	NA	NA	497	8.18356
	M20-M25	K55-K64	J90-J94	NA	NA	255	8.18356
	I10-I15	L80-L99	I95-I99	NA	NA	288	8.17671
	K50-K52	D50-D53	J95-J99	NA	NA	115	8.1726
	K50-K52	H25-H28	N17-N19	NA	NA	246	8.16438
	I20-I25	H25-H28	J09-J18	NA	NA	257	8.16164
	G50-G59	M15-M19	I26-I28	NA	NA	123	8.16164
	I10-I15	F30-F39	N17-N19	NA	NA	500	8.16027
	I10-I15	H53-H54	J09-J18	NA	NA	138	8.15479
	J40-J47	E65-E68	A00-A09	NA	NA	251	8.15342
	I80-I89	M70-M79	J90-J94	NA	NA	160	8.15342
	K20-K31	E70-E90	N17-N19	NA	NA	1117	8.14247
	M50-M54	D50-D53	J95-J99	NA	NA	98	8.13699
	K20-K31	L00-L08	A00-A09	NA	NA	233	8.13425
	D10-D36	C76-C80	K90-K93	NA	NA	151	8.13425
	N80-N98	C51-C58	K50-K52	NA	NA	131	8.13151
	G50-G59	M05-M14	N17-N19	NA	NA	252	8.1274
	I10-I15	I30-I52	N17-N19	NA	NA	1073	8.12603
	K50-K52	G50-G59	M15-M19	NA	NA	547	8.12329
	K00-K14	M15-M19	H25-H28	NA	NA	339	8.12329
	I80-I89	M70-M79	H40-H42	NA	NA	97	8.12329
	K50-K52	H25-H28	A00-A09	NA	NA	229	8.11781
	M20-M25	I30-I52	I95-I99	NA	NA	206	8.11507
	K40-K46	M05-M14	N17-N19	NA	NA	394	8.11233
	I10-I15	D50-D53	N17-N19	NA	NA	546	8.11096
	G50-G59	M05-M14	J90-J94	NA	NA	84	8.11096
	K20-K31	D37-D48	N17-N19	NA	NA	107	8.10959
	J40-J47	I30-I52	N17-N19	NA	NA	496	8.10822
	I10-I15	K20-K31	E70-E90	NA	NA	3796	8.10411
	I10-I15	H30-H36	J95-J99	NA	NA	109	8.10411
	I80-I89	F30-F39	J09-J18	NA	NA	210	8.06986
	I80-I89	F30-F39	N17-N19	NA	NA	214	8.06575
	K20-K31	M05-M14	A00-A09	NA	NA	605	8.04932
	I10-I15	D50-D53	A30-A49	NA	NA	193	8.04932
	I10-I15	I30-I52	I95-I99	NA	NA	562	8.04658
	K20-K31	H25-H28	N17-N19	NA	NA	555	8.0411
	K20-K31	H25-H28	I95-I99	NA	NA	273	8.0411
	I80-I89	I30-I52	N17-N19	NA	NA	390	8.03562
	D10-D36	E65-E68	J90-J94	NA	NA	72	8.03151
	J40-J47	H25-H28	J09-J18	NA	NA	358	8.02466
	I80-I89	I30-I52	I95-I99	NA	NA	236	8.02466
	I10-I15	H30-H36	A00-A09	NA	NA	194	8.01507
	K40-K46	H25-H28	I95-I99	NA	NA	173	8.0137
	K20-K31	I30-I52	I95-I99	NA	NA	426	8.00959
	K55-K64	M05-M14	N17-N19	NA	NA	663	8.00822
	E10-E14	D60-D64	A00-A09	NA	NA	232	8.00411
	D10-D36	C15-C26	K90-K93	NA	NA	157	7.99726
	K50-K52	F30-F39	J09-J18	NA	NA	201	7.99178
	K40-K46	F30-F39	J95-J99	NA	NA	184	7.98767
	G50-G59	G40-G47	J09-J18	NA	NA	115	7.9863
	K20-K31	E70-E90	A00-A09	NA	NA	990	7.98356
	I10-I15	H25-H28	J95-J99	NA	NA	335	7.98082
	D10-D36	C15-C26	A00-A09	NA	NA	109	7.98082
	K20-K31	F30-F39	J09-J18	NA	NA	450	7.97808
	I10-I15	M15-M19	I30-I52	NA	NA	1931	7.96986
	I10-I15	M45-M49	A30-A49	NA	NA	188	7.96986
	J40-J47	E65-E68	N17-N19	NA	NA	293	7.96712
	I10-I15	I80-I89	E70-E90	NA	NA	1876	7.96438
	I10-I15	K40-K46	E70-E90	NA	NA	2367	7.96164
	I80-I89	K40-K46	J90-J94	NA	NA	174	7.96027
	K20-K31	H25-H28	J90-J94	NA	NA	193	7.94521
	N80-N98	E65-E68	NA	NA	NA	3515	7.93973
	K20-K31	K80-K87	C76-C80	N17-N19	NA	54	7.93836
	M20-M25	F30-F39	N17-N19	NA	NA	223	7.93699
	K20-K31	H25-H28	J95-J99	NA	NA	255	7.93425
	J40-J47	E65-E68	A30-A49	NA	NA	125	7.93151
	M20-M25	F30-F39	J95-J99	NA	NA	161	7.92603
	I10-I15	E70-E90	N17-N19	NA	NA	1376	7.92329
	K20-K31	M45-M49	A00-A09	NA	NA	420	7.90959
	J40-J47	M05-M14	D50-D53	NA	NA	364	7.90822
	J40-J47	M45-M49	J09-J18	NA	NA	294	7.89863
	I80-I89	M15-M19	J90-J94	NA	NA	214	7.89863
	M15-M19	B95-B98	H25-H28	NA	NA	494	7.89726
	M20-M25	M05-M14	M40-M43	NA	NA	284	7.89589
	I20-I25	H25-H28	J95-J99	NA	NA	172	7.89589
	J40-J47	H25-H28	N17-N19	NA	NA	372	7.89315
	N80-N98	C51-C58	L00-L08	NA	NA	80	7.89315
	K40-K46	I30-I52	N17-N19	NA	NA	472	7.89178
	D10-D36	C76-C80	B95-B98	NA	NA	201	7.86849
	J40-J47	H25-H28	J90-J94	NA	NA	150	7.85342
	I10-I15	M15-M19	D50-D53	NA	NA	923	7.84658
	K40-K46	F30-F39	J09-J18	NA	NA	273	7.83562
	J40-J47	D60-D64	A00-A09	NA	NA	289	7.83288
	K20-K31	H25-H28	J09-J18	NA	NA	399	7.82466
	N60-N64	I95-I99	NA	NA	NA	190	7.80274
	C50-C50	E70-E90	A00-A09	NA	NA	149	7.8
	J40-J47	M80-M85	A30-A49	NA	NA	143	7.8
	G50-G59	K55-K64	J90-J94	NA	NA	141	7.79726
	K20-K31	H25-H28	A00-A09	NA	NA	445	7.79452
	K50-K52	M45-M49	A00-A09	NA	NA	217	7.79452
	M20-M25	C76-C80	J09-J18	NA	NA	107	7.78904
	E00-E07	D50-D53	N17-N19	NA	NA	184	7.78767
	M70-M79	H25-H28	N17-N19	NA	NA	292	7.78219
	I10-I15	K50-K52	E70-E90	NA	NA	1306	7.77534
	I10-I15	E65-E68	A30-A49	NA	NA	197	7.76986
	K00-K14	E65-E68	N17-N19	NA	NA	107	7.76712
	I20-I25	H25-H28	J90-J94	NA	NA	156	7.76575
	K20-K31	I30-I52	N17-N19	NA	NA	717	7.76438
	N80-N98	C51-C58	J09-J18	NA	NA	89	7.76438
	J40-J47	D50-D53	N17-N19	NA	NA	266	7.76164
	J40-J47	H25-H28	J95-J99	NA	NA	270	7.7589
	I20-I25	D50-D53	N17-N19	NA	NA	262	7.75342
	K55-K64	M45-M49	N17-N19	NA	NA	440	7.75068
	I10-I15	I30-I52	A00-A09	NA	NA	707	7.74795
	N80-N98	C51-C58	E70-E90	NA	NA	268	7.74521
	K80-K87	I30-I52	N17-N19	NA	NA	268	7.74521
	K50-K52	H25-H28	J09-J18	NA	NA	159	7.74247
	J40-J47	M45-M49	A00-A09	NA	NA	262	7.7411
	I10-I15	K55-K64	E70-E90	NA	NA	3809	7.73973
	K50-K52	D50-D53	N17-N19	NA	NA	190	7.73836
	K20-K31	H53-H54	J09-J18	NA	NA	129	7.73699
	K50-K52	G50-G59	J20-J22	NA	NA	122	7.7274
	J40-J47	D50-D53	J95-J99	NA	NA	204	7.71507
	M20-M25	E65-E68	N17-N19	NA	NA	217	7.70959
	J40-J47	I30-I52	I95-I99	NA	NA	274	7.70685
	K55-K64	H25-H28	N17-N19	NA	NA	570	7.70411
	K40-K46	E70-E90	J95-J99	NA	NA	366	7.70411
	I10-I15	I70-I79	A30-A49	NA	NA	153	7.70411
	K50-K52	B95-B98	H25-H28	NA	NA	230	7.69863
	K20-K31	C76-C80	I95-I99	NA	NA	132	7.69726
	C50-C50	L00-L08	A00-A09	NA	NA	62	7.69726
	N80-N98	F30-F39	NA	NA	NA	4027	7.69589
	K55-K64	E70-E90	N17-N19	NA	NA	1193	7.68767
	K40-K46	I30-I52	I95-I99	NA	NA	265	7.67671
	K50-K52	F10-F19	N17-N19	NA	NA	129	7.67671
	I80-I89	E65-E68	J90-J94	NA	NA	81	7.67671
	K20-K31	M45-M49	J09-J18	NA	NA	336	7.66849
	K20-K31	F10-F19	I95-I99	NA	NA	171	7.66575
	N80-N98	M05-M14	NA	NA	NA	4746	7.66027
	K40-K46	E70-E90	N17-N19	NA	NA	708	7.6589
	K40-K46	C76-C80	L00-L08	NA	NA	86	7.65753
	K55-K64	I30-I52	N17-N19	NA	NA	769	7.65479
	M50-M54	E65-E68	N17-N19	NA	NA	238	7.64658
	J40-J47	M05-M14	A00-A09	NA	NA	406	7.64521
	K55-K64	F30-F39	J95-J99	NA	NA	296	7.63836
	I20-I25	D50-D53	J95-J99	NA	NA	121	7.63288
	I80-I89	E65-E68	N17-N19	NA	NA	223	7.62466
	M50-M54	F30-F39	N17-N19	NA	NA	232	7.61918
	M20-M25	M45-M49	N17-N19	NA	NA	286	7.61781
	I10-I15	L00-L08	A00-A09	NA	NA	283	7.6137
	K20-K31	E65-E68	J90-J94	NA	NA	133	7.6137
	D10-D36	D60-D64	A30-A49	NA	NA	153	7.59178
	G50-G59	E70-E90	N17-N19	NA	NA	358	7.58767
	M70-M79	F10-F19	J95-J99	NA	NA	136	7.57397
	M50-M54	I30-I52	N17-N19	NA	NA	335	7.56986
	I20-I25	D60-D64	A00-A09	NA	NA	250	7.56986
	K20-K31	E70-E90	J95-J99	NA	NA	610	7.56849
	K50-K52	F10-F19	J95-J99	NA	NA	131	7.5589
	K55-K64	F30-F39	N17-N19	NA	NA	431	7.55616
	N60-N64	M80-M85	NA	NA	NA	413	7.53973
	G50-G59	E65-E68	N17-N19	NA	NA	152	7.53836
	I80-I89	E70-E90	N17-N19	NA	NA	585	7.52877
	N70-N77	F10-F19	NA	NA	NA	487	7.52877
	I10-I15	E65-E68	A00-A09	NA	NA	398	7.52877
	K20-K31	D37-D48	J09-J18	NA	NA	110	7.5274
	M20-M25	D50-D53	N17-N19	NA	NA	192	7.52603
	I80-I89	H25-H28	J09-J18	NA	NA	212	7.50411
	K55-K64	H25-H28	A30-A49	NA	NA	246	7.50137
	M70-M79	D50-D53	N17-N19	NA	NA	204	7.49863
	I10-I15	J20-J22	J09-J18	NA	NA	478	7.49178
	K50-K52	J20-J22	J09-J18	NA	NA	229	7.49041
	K50-K52	H25-H28	J90-J94	NA	NA	91	7.46575
	K00-K14	E70-E90	N17-N19	NA	NA	261	7.45753
	K20-K31	J20-J22	J09-J18	NA	NA	432	7.45068
	M50-M54	F30-F39	J09-J18	NA	NA	237	7.44932
	K55-K64	F30-F39	J09-J18	NA	NA	439	7.42192
	K55-K64	H25-H28	J09-J18	NA	NA	417	7.42192
	M20-M25	M45-M49	J90-J94	NA	NA	111	7.41096
	I80-I89	E70-E90	J95-J99	NA	NA	342	7.40822
	K20-K31	E65-E68	A00-A09	NA	NA	344	7.40685
	M50-M54	H25-H28	N17-N19	NA	NA	264	7.40274
	K50-K52	G40-G47	I95-I99	NA	NA	91	7.40274
	D10-D36	K70-K77	I95-I99	NA	NA	62	7.39041
	K50-K52	E70-E90	J95-J99	NA	NA	275	7.38356
	M15-M19	H25-H28	J90-J94	NA	NA	169	7.3726
	K55-K64	E65-E68	N17-N19	NA	NA	420	7.37123
	N80-N98	C51-C58	I26-I28	NA	NA	54	7.37123
	M70-M79	H25-H28	J09-J18	NA	NA	217	7.36164
	I10-I15	E70-E90	A00-A09	NA	NA	979	7.35068
	I10-I15	M45-M49	A00-A09	NA	NA	414	7.34932
	D10-D36	C15-C26	J95-J99	NA	NA	60	7.34521
	C50-C50	D60-D64	A00-A09	NA	NA	98	7.3411
	N30-N39	M45-M49	N17-N19	NA	NA	307	7.33973
	N80-N98	C51-C58	J95-J99	NA	NA	56	7.33973
	I10-I15	D60-D64	A00-A09	NA	NA	537	7.33699
	I10-I15	F10-F19	N17-N19	NA	NA	362	7.29452
	K50-K52	M45-M49	J09-J18	NA	NA	129	7.29315
	N80-N98	M15-M19	NA	NA	NA	10251	7.29041
	M70-M79	E65-E68	N17-N19	NA	NA	269	7.27123
	N80-N98	C51-C58	K55-K64	NA	NA	502	7.2589
	K20-K31	C15-C26	I95-I99	NA	NA	91	7.23836
	N80-N98	E10-E14	NA	NA	NA	3281	7.23288
	L60-L75	E65-E68	NA	NA	NA	461	7.23014
	I20-I25	E65-E68	J90-J94	NA	NA	84	7.23014
	K55-K64	E70-E90	J95-J99	NA	NA	664	7.21507
	K20-K31	F10-F19	N17-N19	NA	NA	291	7.2137
	J40-J47	E70-E90	J95-J99	NA	NA	555	7.20822
	N80-N98	C51-C58	J90-J94	NA	NA	101	7.20548
	N80-N98	C51-C58	D60-D64	NA	NA	178	7.19726
	K80-K87	M15-M19	C76-C80	NA	NA	214	7.19589
	N60-N64	K90-K93	NA	NA	NA	366	7.18356
	M15-M19	I60-I69	J09-J18	NA	NA	182	7.15753
	N70-N77	F40-F48	NA	NA	NA	411	7.15616
	N60-N64	E65-E68	NA	NA	NA	396	7.15205
	M15-M19	H25-H28	J09-J18	NA	NA	357	7.13425
	N60-N64	G40-G47	NA	NA	NA	355	7.12603
	I10-I15	D50-D53	J95-J99	NA	NA	238	7.12603
	C50-C50	K55-K64	A30-A49	NA	NA	238	7.12329
	M15-M19	H25-H28	N17-N19	NA	NA	485	7.10685
	L60-L75	F10-F19	NA	NA	NA	437	7.10137
	C50-C50	M80-M85	A00-A09	NA	NA	72	7.09863
	K20-K31	C15-C26	J09-J18	NA	NA	126	7.07534
	M20-M25	F10-F19	N17-N19	NA	NA	118	7.07534
	K40-K46	F10-F19	N17-N19	NA	NA	175	7.06575
	K20-K31	C76-C80	K90-K93	NA	NA	210	7.05068
	C50-C50	K55-K64	D70-D77	NA	NA	339	7.03014
	C50-C50	I80-I89	A30-A49	NA	NA	146	7.02877
	K40-K46	F30-F39	N17-N19	NA	NA	262	7.02329
	E10-E14	C76-C80	N17-N19	NA	NA	116	7.01644
	N60-N64	M65-M68	NA	NA	NA	302	7.00411
	M70-M79	F10-F19	N17-N19	NA	NA	148	6.97123
	K20-K31	K80-K87	C76-C80	D70-D77	NA	59	6.95068
	G50-G59	D50-D53	N17-N19	NA	NA	123	6.93151
	L60-L75	F40-F48	NA	NA	NA	315	6.92603
	N70-N77	J95-J99	NA	NA	NA	210	6.92603
	M20-M25	C15-C26	E70-E90	NA	NA	140	6.92466
	G50-G59	F30-F39	J09-J18	NA	NA	150	6.91918
	N80-N98	I10-I15	NA	NA	NA	12881	6.90411
	K20-K31	K80-K87	C76-C80	A30-A49	NA	57	6.90137
	M70-M79	M40-M43	N17-N19	NA	NA	94	6.87534
	D10-D36	C15-C26	A30-A49	NA	NA	79	6.87397
	M15-M19	H25-H28	J95-J99	NA	NA	217	6.86849
	J40-J47	D60-D64	A30-A49	NA	NA	189	6.84932
	L60-L75	F30-F39	NA	NA	NA	487	6.84384
	K20-K31	C15-C26	E70-E90	NA	NA	360	6.83973
	N80-N98	C51-C58	N30-N39	NA	NA	217	6.83562
	K40-K46	F10-F19	J95-J99	NA	NA	148	6.83014
	K55-K64	F10-F19	N17-N19	NA	NA	291	6.81096
	N80-N98	I20-I25	NA	NA	NA	3716	6.80822
	M50-M54	D50-D53	N17-N19	NA	NA	193	6.80274
	G50-G59	F10-F19	N17-N19	NA	NA	68	6.80274
	M50-M54	F30-F39	J95-J99	NA	NA	167	6.79452
	I10-I15	C76-C80	K90-K93	NA	NA	193	6.79178
	M15-M19	C76-C80	J20-J22	NA	NA	126	6.77808
	C50-C50	D60-D64	A30-A49	NA	NA	110	6.77534
	M50-M54	F10-F19	J95-J99	NA	NA	135	6.76986
	D10-D36	C76-C80	D60-D64	NA	NA	271	6.75616
	N60-N64	M20-M25	NA	NA	NA	952	6.75479
	N60-N64	J95-J99	NA	NA	NA	169	6.74795
	N60-N64	F30-F39	NA	NA	NA	504	6.73699
	D10-D36	C15-C26	K65-K67	NA	NA	110	6.73699
	K20-K31	C15-C26	N17-N19	NA	NA	151	6.72877
	C50-C50	C15-C26	D60-D64	NA	NA	59	6.72877
	K55-K64	F10-F19	J95-J99	NA	NA	265	6.71233
	G50-G59	E70-E90	J95-J99	NA	NA	193	6.71233
	J40-J47	D50-D53	A30-A49	NA	NA	113	6.69863
	C43-C44	C76-C80	A00-A09	NA	NA	51	6.69315
	K20-K31	F10-F19	J95-J99	NA	NA	245	6.69041
	N80-N98	C15-C26	NA	NA	NA	995	6.68767
	C50-C50	I30-I52	N17-N19	NA	NA	116	6.68493
	M15-M19	D50-D53	N17-N19	NA	NA	313	6.66301
	N80-N98	E00-E07	NA	NA	NA	5259	6.65753
	C43-C44	C76-C80	J90-J94	NA	NA	63	6.62192
	K20-K31	C15-C26	C76-C80	N17-N19	NA	47	6.61096
	C43-C44	C76-C80	J09-J18	NA	NA	58	6.58904
	I10-I15	D60-D64	A30-A49	NA	NA	374	6.58219
	N20-N23	A00-A09	NA	NA	NA	202	6.57945
	N80-N98	C51-C58	B95-B98	NA	NA	127	6.5726
	C43-C44	C76-C80	J95-J99	NA	NA	35	6.56986
	N80-N98	C76-C80	NA	NA	NA	2245	6.54521
	K20-K31	C76-C80	J20-J22	NA	NA	203	6.54521
	K20-K31	K80-K87	C76-C80	NA	NA	348	6.54247
	N70-N77	F30-F39	NA	NA	NA	672	6.53836
	K20-K31	D37-D48	J95-J99	NA	NA	84	6.53836
	N80-N98	J40-J47	NA	NA	NA	7226	6.53014
	L60-L75	M05-M14	NA	NA	NA	695	6.52329
	N60-N64	J40-J47	NA	NA	NA	900	6.50548
	M20-M25	F10-F19	J95-J99	NA	NA	110	6.50137
	N80-N98	D50-D53	NA	NA	NA	2533	6.49863
	N80-N98	M70-M79	NA	NA	NA	6553	6.47123
	N70-N77	A00-A09	NA	NA	NA	441	6.46301
	N80-N98	M65-M68	NA	NA	NA	2300	6.45205
	M15-M19	D50-D53	J95-J99	NA	NA	174	6.4411
	M20-M25	C76-C80	D60-D64	NA	NA	157	6.43562
	C50-C50	C76-C80	J90-J94	NA	NA	223	6.43288
	N70-N77	E65-E68	NA	NA	NA	611	6.42466
	I10-I15	C76-C80	B95-B98	NA	NA	319	6.41644
	K20-K31	C15-C26	K65-K67	NA	NA	136	6.4137
	K40-K46	E65-E68	J90-J94	NA	NA	112	6.41096
	N80-N98	K20-K31	NA	NA	NA	14109	6.40822
	K50-K52	I30-I52	I95-I99	NA	NA	202	6.39589
	N60-N64	K20-K31	NA	NA	NA	1529	6.38904
	K20-K31	F10-F19	J90-J94	NA	NA	155	6.37808
	M50-M54	F10-F19	N17-N19	NA	NA	147	6.36712
	M05-M14	D50-D53	J95-J99	NA	NA	130	6.36164
	J40-J47	E65-E68	J90-J94	NA	NA	109	6.36164
	N80-N98	M20-M25	NA	NA	NA	8332	6.34932
	N80-N98	K40-K46	NA	NA	NA	8249	6.34521
	N70-N77	M70-M79	NA	NA	NA	1036	6.34384
	K20-K31	C15-C26	C76-C80	A30-A49	NA	42	6.33973
	N70-N77	M20-M25	NA	NA	NA	1150	6.3274
	I10-I15	C76-C80	A00-A09	NA	NA	242	6.32192
	D10-D36	M15-M19	NA	NA	NA	6645	6.32055
	M05-M14	D50-D53	N17-N19	NA	NA	241	6.31507
	L60-L75	E10-E14	NA	NA	NA	449	6.31233
	D10-D36	E65-E68	NA	NA	NA	2257	6.30685
	E10-E14	D60-D64	A30-A49	NA	NA	165	6.30137
	N80-N98	G50-G59	NA	NA	NA	4684	6.29863
	N70-N77	J09-J18	NA	NA	NA	333	6.29863
	J30-J39	K90-K93	NA	NA	NA	515	6.29589
	K20-K31	C76-C80	J09-J18	NA	NA	264	6.27397
	N60-N64	M50-M54	NA	NA	NA	629	6.27123
	K55-K64	I30-I52	I95-I99	NA	NA	450	6.25616
	N80-N98	K55-K64	NA	NA	NA	15200	6.24658
	N80-N98	K00-K14	NA	NA	NA	3599	6.2411
	N80-N98	K80-K87	NA	NA	NA	5020	6.23836
	N80-N98	M50-M54	NA	NA	NA	5404	6.21507
	J30-J39	K80-K87	NA	NA	NA	806	6.2137
	C50-C50	M50-M54	J90-J94	NA	NA	69	6.20548
	M15-M19	C76-C80	J95-J99	NA	NA	95	6.20274
	N70-N77	G50-G59	NA	NA	NA	686	6.17945
	N60-N64	J20-J22	NA	NA	NA	246	6.17123
	E10-E14	H30-H36	NA	NA	NA	900	6.16575
	J30-J39	M50-M54	NA	NA	NA	1019	6.16164
	N60-N64	B95-B98	NA	NA	NA	407	6.16164
	N80-N98	H00-H06	NA	NA	NA	2111	6.15616
	K80-K87	F10-F19	N17-N19	NA	NA	114	6.15479
	N70-N77	K70-K77	NA	NA	NA	211	6.14521
	N70-N77	K00-K14	NA	NA	NA	560	6.12329
	I10-I15	C76-C80	I95-I99	NA	NA	165	6.10411
	C50-C50	N17-N19	NA	NA	NA	543	6.07945
	J40-J47	C76-C80	D60-D64	NA	NA	176	6.07945
	J30-J39	M40-M43	NA	NA	NA	184	6.06849
	D10-D36	C15-C26	C76-C80	NA	NA	274	6.06438
	J30-J39	K40-K46	NA	NA	NA	1450	6.05753
	J30-J39	M80-M85	NA	NA	NA	594	6.04658
	L60-L75	E70-E90	NA	NA	NA	1076	6.03973
	J30-J39	E65-E68	NA	NA	NA	560	6.03973
	E10-E14	C76-C80	J09-J18	NA	NA	94	6.03288
	I10-I15	C76-C80	J95-J99	NA	NA	200	6.0274
	K20-K31	C76-C80	A00-A09	NA	NA	236	6.02603
	J30-J39	F40-F48	NA	NA	NA	478	6.02055
	N80-N98	K65-K67	NA	NA	NA	1291	6.01644
	L60-L75	M15-M19	NA	NA	NA	1339	5.99726
	N70-N77	G40-G47	NA	NA	NA	480	5.99726
	I10-I15	C76-C80	J20-J22	NA	NA	225	5.99726
	K40-K46	C76-C80	J20-J22	NA	NA	110	5.99726
	I10-I15	C76-C80	J09-J18	NA	NA	296	5.99178
	L60-L75	M45-M49	NA	NA	NA	434	5.98219
	K20-K31	D37-D48	I95-I99	NA	NA	70	5.97397
	K20-K31	C76-C80	N17-N19	NA	NA	238	5.97123
	N60-N64	M70-M79	NA	NA	NA	837	5.96986
	L60-L75	M80-M85	NA	NA	NA	389	5.96986
	I10-I15	C76-C80	N17-N19	NA	NA	353	5.96712
	N20-N23	M80-M85	NA	NA	NA	208	5.95342
	G50-G59	A00-A09	NA	NA	NA	936	5.9411
	D10-D36	M20-M25	NA	NA	NA	5269	5.93973
	M65-M68	N17-N19	NA	NA	NA	323	5.93973
	J30-J39	M15-M19	NA	NA	NA	1859	5.91781
	N30-N39	M65-M68	NA	NA	NA	1065	5.91507
	L60-L75	G40-G47	NA	NA	NA	401	5.91507
	J30-J39	I30-I52	NA	NA	NA	783	5.91233
	J30-J39	B95-B98	NA	NA	NA	591	5.90959
	D10-D36	M70-M79	NA	NA	NA	4054	5.90548
	I80-I89	F40-F48	NA	NA	NA	1346	5.90411
	N70-N77	L80-L99	NA	NA	NA	557	5.89863
	L60-L75	M50-M54	NA	NA	NA	688	5.88904
	D10-D36	K70-K77	NA	NA	NA	834	5.86575
	J30-J39	D60-D64	NA	NA	NA	549	5.86027
	L60-L75	K55-K64	NA	NA	NA	1834	5.85616
	N70-N77	M50-M54	NA	NA	NA	891	5.84932
	J30-J39	M45-M49	NA	NA	NA	625	5.84932
	J30-J39	F30-F39	NA	NA	NA	761	5.84384
	K50-K52	F40-F48	NA	NA	NA	906	5.83699
	N80-N98	J30-J39	NA	NA	NA	2637	5.83288
	N60-N64	L00-L08	NA	NA	NA	318	5.81233
	N70-N77	J30-J39	NA	NA	NA	419	5.81096
	K50-K52	H90-H95	NA	NA	NA	353	5.81096
	N80-N98	I80-I89	NA	NA	NA	8242	5.8
	J30-J39	M65-M68	NA	NA	NA	414	5.79178
	K20-K31	C15-C26	J95-J99	NA	NA	100	5.77534
	N20-N23	I70-I79	NA	NA	NA	96	5.77123
	L60-L75	M70-M79	NA	NA	NA	834	5.76438
	H00-H06	N17-N19	NA	NA	NA	325	5.76438
	J30-J39	K55-K64	NA	NA	NA	2536	5.75205
	H00-H06	K70-K77	NA	NA	NA	194	5.74384
	E10-E14	G50-G59	NA	NA	NA	1561	5.73699
	N70-N77	I95-I99	NA	NA	NA	196	5.7274
	J30-J39	M05-M14	NA	NA	NA	906	5.72329
	N80-N98	L80-L99	NA	NA	NA	3694	5.72055
	J30-J39	A00-A09	NA	NA	NA	481	5.71507
	K55-K64	F10-F19	I95-I99	NA	NA	202	5.70548
	I10-I15	C76-C80	L00-L08	NA	NA	203	5.70411
	J30-J39	E70-E90	NA	NA	NA	1393	5.69863
	K00-K14	D50-D53	NA	NA	NA	640	5.69726
	J30-J39	M20-M25	NA	NA	NA	1489	5.69589
	I10-I15	C76-C80	D60-D64	NA	NA	413	5.67945
	D00-D09	N17-N19	NA	NA	NA	217	5.67397
	N80-N98	C51-C58	D70-D77	NA	NA	91	5.66575
	I80-I89	M40-M43	NA	NA	NA	514	5.65479
	M15-M19	C76-C80	D60-D64	NA	NA	203	5.64384
	N80-N98	K50-K52	NA	NA	NA	4440	5.64247
	N30-N39	H25-H28	NA	NA	NA	2546	5.63699
	E10-E14	G90-G99	NA	NA	NA	369	5.63288
	N80-N98	N10-N16	NA	NA	NA	941	5.6274
	E10-E14	L80-L99	NA	NA	NA	1103	5.61644
	K50-K52	N17-N19	NA	NA	NA	1053	5.6137
	K20-K31	H40-H42	NA	NA	NA	1008	5.61096
	J30-J39	F10-F19	NA	NA	NA	563	5.60274
	I80-I89	H25-H28	NA	NA	NA	2588	5.59452
	M65-M68	H90-H95	NA	NA	NA	181	5.59452
	N70-N77	K90-K93	NA	NA	NA	487	5.58904
	J30-J39	I95-I99	NA	NA	NA	230	5.58904
	M20-M25	N17-N19	NA	NA	NA	1284	5.5863
	N70-N77	D50-D53	NA	NA	NA	412	5.5726
	D10-D36	K90-K93	NA	NA	NA	2012	5.56575
	L60-L75	M20-M25	NA	NA	NA	1037	5.56438
	L60-L75	N30-N39	NA	NA	NA	868	5.55616
	N80-N98	D60-D64	NA	NA	NA	3354	5.54795
	C50-C50	I80-I89	D70-D77	NA	NA	214	5.54795
	K50-K52	H25-H28	NA	NA	NA	1489	5.53973
	J30-J39	M70-M79	NA	NA	NA	1222	5.53973
	J40-J47	C76-C80	J09-J18	NA	NA	218	5.53151
	K20-K31	H90-H95	NA	NA	NA	1053	5.52603
	E10-E14	N30-N39	NA	NA	NA	2228	5.52466
	K50-K52	M65-M68	NA	NA	NA	676	5.52466
	M65-M68	I95-I99	NA	NA	NA	215	5.51507
	K50-K52	M05-M14	NA	NA	NA	1887	5.49315
	K50-K52	M80-M85	NA	NA	NA	1251	5.47945
	J40-J47	C76-C80	J20-J22	NA	NA	169	5.47671
	K50-K52	G40-G47	NA	NA	NA	1042	5.46301
	I10-I15	C76-C80	J90-J94	NA	NA	275	5.46027
	N30-N39	M20-M25	NA	NA	NA	4089	5.45205
	L60-L75	B95-B98	NA	NA	NA	401	5.44932
	K40-K46	C76-C80	J09-J18	NA	NA	145	5.44658
	L60-L75	I70-I79	NA	NA	NA	210	5.44384
	M20-M25	I60-I69	NA	NA	NA	857	5.4274
	I80-I89	M15-M19	NA	NA	NA	5704	5.42603
	K50-K52	E65-E68	NA	NA	NA	1125	5.42466
	K00-K14	E65-E68	NA	NA	NA	848	5.42055
	N30-N39	G50-G59	NA	NA	NA	2371	5.41918
	K20-K31	C76-C80	J95-J99	NA	NA	189	5.41644
	G50-G59	E65-E68	NA	NA	NA	1519	5.40822
	E10-E14	N17-N19	NA	NA	NA	1430	5.40548
	G50-G59	K70-K77	NA	NA	NA	423	5.40548
	N80-N98	C51-C58	A30-A49	NA	NA	90	5.40274
	D10-D36	B95-B98	NA	NA	NA	2086	5.39863
	I80-I89	M80-M85	NA	NA	NA	1808	5.39726
	N60-N64	A30-A49	NA	NA	NA	201	5.39452
	C50-C50	E70-E90	NA	NA	NA	1932	5.38356
	K40-K46	I60-I69	NA	NA	NA	933	5.38356
	K50-K52	M40-M43	NA	NA	NA	327	5.3726
	M20-M25	C15-C26	NA	NA	NA	448	5.37123
	E10-E14	I60-I69	NA	NA	NA	678	5.36986
	C50-C50	C15-C26	NA	NA	NA	283	5.36986
	C50-C50	K40-K46	NA	NA	NA	1580	5.36712
	C50-C50	M50-M54	NA	NA	NA	990	5.36438
	I80-I89	G90-G99	NA	NA	NA	520	5.36438
	N30-N39	M05-M14	NA	NA	NA	3030	5.36027
	G50-G59	N17-N19	NA	NA	NA	798	5.3589
	K50-K52	M15-M19	NA	NA	NA	3264	5.35342
	I80-I89	M05-M14	NA	NA	NA	2923	5.35342
	M20-M25	K40-K46	NA	NA	NA	4739	5.34521
	I80-I89	M20-M25	NA	NA	NA	4418	5.34521
	K00-K14	F10-F19	NA	NA	NA	801	5.34521
	K40-K46	G90-G99	NA	NA	NA	551	5.34521
	H00-H06	M15-M19	NA	NA	NA	1636	5.34384
	K80-K87	C76-C80	J09-J18	NA	NA	130	5.3411
	C50-C50	K55-K64	NA	NA	NA	3062	5.33973
	E10-E14	D50-D53	NA	NA	NA	1227	5.33699
	M20-M25	C76-C80	NA	NA	NA	936	5.33151
	N20-N23	M45-M49	NA	NA	NA	214	5.33014
	I80-I89	I30-I52	NA	NA	NA	2666	5.32603
	G50-G59	A30-A49	NA	NA	NA	398	5.32603
	N20-N23	E65-E68	NA	NA	NA	271	5.32329
	M15-M19	C76-C80	J09-J18	NA	NA	155	5.32055
	K40-K46	L00-L08	NA	NA	NA	1159	5.31781
	M20-M25	J09-J18	NA	NA	NA	1220	5.31507
	K50-K52	H53-H54	NA	NA	NA	363	5.31507
	M65-M68	M40-M43	NA	NA	NA	233	5.31507
	K50-K52	F10-F19	NA	NA	NA	1054	5.30822
	H00-H06	I95-I99	NA	NA	NA	206	5.30685
	E10-E14	H53-H54	NA	NA	NA	371	5.30411
	N30-N39	M15-M19	NA	NA	NA	5532	5.30137
	K50-K52	I70-I79	NA	NA	NA	576	5.3
	K80-K87	M70-M79	NA	NA	NA	2393	5.29863
	K20-K31	M50-M54	NA	NA	NA	5738	5.29452
	G50-G59	J09-J18	NA	NA	NA	721	5.29315
	M65-M68	G90-G99	NA	NA	NA	164	5.29315
	I10-I15	N17-N19	NA	NA	NA	3898	5.2863
	M20-M25	F40-F48	NA	NA	NA	1404	5.2863
	I80-I89	E65-E68	NA	NA	NA	1889	5.28219
	K50-K52	M45-M49	NA	NA	NA	1184	5.28219
	J40-J47	I60-I69	NA	NA	NA	992	5.27945
	H00-H06	F10-F19	NA	NA	NA	429	5.27945
	I80-I89	I70-I79	NA	NA	NA	867	5.27671
	M20-M25	A30-A49	NA	NA	NA	628	5.27671
	J30-J39	I70-I79	NA	NA	NA	270	5.27534
	L80-L99	H25-H28	NA	NA	NA	1387	5.26849
	N20-N23	K90-K93	NA	NA	NA	211	5.26849
	I80-I89	M50-M54	NA	NA	NA	2850	5.26712
	I80-I89	F30-F39	NA	NA	NA	2078	5.26575
	I80-I89	H90-H95	NA	NA	NA	566	5.26164
	K20-K31	M70-M79	NA	NA	NA	6905	5.26027
	N30-N39	E65-E68	NA	NA	NA	1968	5.25753
	M20-M25	D50-D53	NA	NA	NA	1421	5.24932
	M65-M68	F30-F39	NA	NA	NA	631	5.24658
	I20-I25	K65-K67	NA	NA	NA	351	5.24658
	I10-I15	I80-I89	NA	NA	NA	7145	5.23836
	K50-K52	G50-G59	NA	NA	NA	1446	5.23836
	J30-J39	L80-L99	NA	NA	NA	652	5.23562
	G50-G59	K40-K46	NA	NA	NA	2656	5.23425
	G50-G59	H30-H36	NA	NA	NA	514	5.23425
	I80-I89	K65-K67	NA	NA	NA	617	5.23288
	N30-N39	M70-M79	NA	NA	NA	3647	5.23014
	M65-M68	F40-F48	NA	NA	NA	379	5.23014
	G50-G59	I30-I52	NA	NA	NA	1463	5.21918
	K80-K87	H53-H54	NA	NA	NA	375	5.21918
	G50-G59	K55-K64	NA	NA	NA	4545	5.21644
	M20-M25	I30-I52	NA	NA	NA	2618	5.21233
	K20-K31	H25-H28	NA	NA	NA	4991	5.20822
	N70-N77	L00-L08	NA	NA	NA	368	5.20822
	I10-I15	C76-C80	I26-I28	NA	NA	151	5.20548
	M15-M19	C76-C80	J90-J94	NA	NA	139	5.20548
	N60-N64	C76-C80	D70-D77	NA	NA	79	5.20548
	M20-M25	K55-K64	NA	NA	NA	8054	5.20274
	N30-N39	H30-H36	NA	NA	NA	788	5.20274
	K20-K31	L00-L08	NA	NA	NA	1807	5.2
	K80-K87	M15-M19	NA	NA	NA	3705	5.19726
	I80-I89	M45-M49	NA	NA	NA	1912	5.19452
	K40-K46	H53-H54	NA	NA	NA	593	5.19178
	N30-N39	K40-K46	NA	NA	NA	4355	5.18904
	K20-K31	G90-G99	NA	NA	NA	995	5.18356
	G50-G59	I20-I25	NA	NA	NA	1549	5.18082
	K00-K14	F30-F39	NA	NA	NA	1094	5.17808
	I10-I15	L80-L99	NA	NA	NA	3829	5.17534
	D10-D36	N30-N39	NA	NA	NA	4577	5.1726
	I80-I89	G40-G47	NA	NA	NA	1577	5.1726
	I20-I25	H30-H36	NA	NA	NA	698	5.16712
	J30-J39	H00-H06	NA	NA	NA	434	5.16712
	H00-H06	I60-I69	NA	NA	NA	240	5.16712
	K00-K14	M40-M43	NA	NA	NA	240	5.16438
	N30-N39	F10-F19	NA	NA	NA	1517	5.16164
	E10-E14	C76-C80	D60-D64	NA	NA	139	5.16164
	K20-K31	M15-M19	NA	NA	NA	10943	5.1589
	K20-K31	I60-I69	NA	NA	NA	1565	5.1589
	M20-M25	J20-J22	NA	NA	NA	1039	5.1589
	E10-E14	M70-M79	NA	NA	NA	1991	5.15342
	I80-I89	K40-K46	NA	NA	NA	4559	5.14247
	G50-G59	H25-H28	NA	NA	NA	1640	5.14247
	J40-J47	L00-L08	NA	NA	NA	1339	5.13973
	M65-M68	F10-F19	NA	NA	NA	426	5.13973
	K50-K52	F30-F39	NA	NA	NA	1489	5.13699
	C50-C50	K00-K14	NA	NA	NA	801	5.13699
	K20-K31	C76-C80	J90-J94	NA	NA	268	5.13699
	K20-K31	M45-M49	NA	NA	NA	3932	5.13562
	K20-K31	M80-M85	NA	NA	NA	3632	5.13562
	G50-G59	H90-H95	NA	NA	NA	426	5.13562
	K50-K52	I60-I69	NA	NA	NA	579	5.13425
	H00-H06	M80-M85	NA	NA	NA	533	5.13425
	J40-J47	N10-N16	NA	NA	NA	495	5.13425
	N60-N64	L60-L75	NA	NA	NA	277	5.13151
	M20-M25	I26-I28	NA	NA	NA	565	5.12603
	I10-I15	N30-N39	NA	NA	NA	7376	5.12329
	I80-I89	I60-I69	NA	NA	NA	817	5.12329
	E10-E14	I95-I99	NA	NA	NA	563	5.12329
	C50-C50	N30-N39	NA	NA	NA	1510	5.12192
	K40-K46	H25-H28	NA	NA	NA	3005	5.11781
	M65-M68	E70-E90	NA	NA	NA	1354	5.11781
	N30-N39	H90-H95	NA	NA	NA	614	5.11644
	I20-I25	H25-H28	NA	NA	NA	2236	5.11233
	J40-J47	F40-F48	NA	NA	NA	1681	5.10685
	K50-K52	M20-M25	NA	NA	NA	2423	5.10411
	C50-C50	I80-I89	NA	NA	NA	1807	5.10137
	N70-N77	K55-K64	NA	NA	NA	2246	5.09863
	K40-K46	H90-H95	NA	NA	NA	636	5.09863
	K50-K52	L80-L99	NA	NA	NA	1154	5.09452
	I80-I89	M70-M79	NA	NA	NA	3774	5.09315
	M20-M25	I95-I99	NA	NA	NA	811	5.09315
	K20-K31	H53-H54	NA	NA	NA	1035	5.08767
	L80-L99	H40-H42	NA	NA	NA	289	5.08219
	K00-K14	M15-M19	NA	NA	NA	2370	5.07945
	M20-M25	J95-J99	NA	NA	NA	707	5.07945
	E00-E07	I60-I69	NA	NA	NA	621	5.07945
	M50-M54	I26-I28	NA	NA	NA	435	5.07945
	K50-K52	M50-M54	NA	NA	NA	1827	5.07671
	K50-K52	G90-G99	NA	NA	NA	414	5.07397
	K20-K31	E65-E68	NA	NA	NA	3446	5.06575
	D10-D36	C15-C26	D70-D77	NA	NA	74	5.06438
	I80-I89	E70-E90	NA	NA	NA	4580	5.06301
	C50-C50	J95-J99	NA	NA	NA	397	5.06301
	M20-M25	F10-F19	NA	NA	NA	1480	5.06164
	J30-J39	J09-J18	NA	NA	NA	440	5.06164
	K50-K52	I30-I52	NA	NA	NA	1717	5.05753
	D10-D36	C76-C80	NA	NA	NA	1641	5.05753
	E10-E14	I20-I25	NA	NA	NA	2039	5.05479
	G50-G59	J95-J99	NA	NA	NA	450	5.05342
	I80-I89	A00-A09	NA	NA	NA	1525	5.04932
	K50-K52	K70-K77	NA	NA	NA	564	5.04795
	I10-I15	K20-K31	NA	NA	NA	14417	5.04384
	G50-G59	F10-F19	NA	NA	NA	978	5.04247
	K80-K87	M45-M49	NA	NA	NA	1279	5.0411
	N80-N98	C51-C58	N10-N16	NA	NA	80	5.03973
	N30-N39	H40-H42	NA	NA	NA	489	5.03836
	C50-C50	I30-I52	NA	NA	NA	1128	5.03151
	K50-K52	K00-K14	NA	NA	NA	1125	5.02466
	K00-K14	M45-M49	NA	NA	NA	897	5.02466
	C50-C50	I95-I99	NA	NA	NA	431	5.02466
	I10-I15	K50-K52	NA	NA	NA	4490	5.02192
	K50-K52	D50-D53	NA	NA	NA	1110	5.02192
	K40-K46	F40-F48	NA	NA	NA	1550	5.01781
	J40-J47	K40-K46	NA	NA	NA	5004	5.01644
	E10-E14	H25-H28	NA	NA	NA	1936	5.01644
	G50-G59	B95-B98	NA	NA	NA	1150	5.01233
	J40-J47	E65-E68	NA	NA	NA	2271	5.01096
	J40-J47	M70-M79	NA	NA	NA	4127	5.00548
	N30-N39	F40-F48	NA	NA	NA	1475	5.00548
	K40-K46	M05-M14	NA	NA	NA	3488	5.00274
	I20-I25	L00-L08	NA	NA	NA	811	5
	N20-N23	J09-J18	NA	NA	NA	175	5
	J40-J47	N17-N19	NA	NA	NA	1709	4.99726
	K50-K52	M70-M79	NA	NA	NA	2262	4.99452
	G50-G59	F40-F48	NA	NA	NA	896	4.99178
	K50-K52	A00-A09	NA	NA	NA	1612	4.99041
	E10-E14	L00-L08	NA	NA	NA	851	4.9863
	C50-C50	J90-J94	NA	NA	NA	587	4.9863
	K20-K31	F30-F39	NA	NA	NA	4134	4.98356
	K55-K64	I60-I69	NA	NA	NA	1712	4.98356
	K80-K87	I60-I69	NA	NA	NA	544	4.98356
	K00-K14	I60-I69	NA	NA	NA	383	4.98356
	J40-J47	H53-H54	NA	NA	NA	618	4.98082
	M20-M25	K70-K77	NA	NA	NA	684	4.97808
	I20-I25	N17-N19	NA	NA	NA	1479	4.97534
	L00-L08	H25-H28	NA	NA	NA	745	4.97534
	K50-K52	I26-I28	NA	NA	NA	402	4.9726
	J40-J47	F30-F39	NA	NA	NA	2556	4.96575
	L80-L99	E65-E68	NA	NA	NA	960	4.96575
	K20-K31	N17-N19	NA	NA	NA	2597	4.96438
	K80-K87	C76-C80	J90-J94	NA	NA	118	4.96164
	M20-M25	E65-E68	NA	NA	NA	2335	4.9589
	H00-H06	J20-J22	NA	NA	NA	291	4.9589
	N20-N23	D50-D53	NA	NA	NA	165	4.9589
	K40-K46	M15-M19	NA	NA	NA	6698	4.95753
	G50-G59	M15-M19	NA	NA	NA	4615	4.95616
	K20-K31	I70-I79	NA	NA	NA	1542	4.95616
	H00-H06	E70-E90	NA	NA	NA	1351	4.95616
	K40-K46	J20-J22	NA	NA	NA	1230	4.95479
	I10-I15	L00-L08	NA	NA	NA	2271	4.95068
	J40-J47	K65-K67	NA	NA	NA	649	4.95068
	G50-G59	M05-M14	NA	NA	NA	2379	4.94521
	M65-M68	D60-D64	NA	NA	NA	528	4.93973
	K80-K87	G90-G99	NA	NA	NA	362	4.93836
	J40-J47	M05-M14	NA	NA	NA	3478	4.93425
	M50-M54	I60-I69	NA	NA	NA	643	4.93425
	M20-M25	A00-A09	NA	NA	NA	1608	4.93151
	J40-J47	M40-M43	NA	NA	NA	653	4.93151
	C50-C50	M80-M85	NA	NA	NA	952	4.93014
	M50-M54	K70-K77	NA	NA	NA	555	4.92877
	G50-G59	G40-G47	NA	NA	NA	1079	4.92329
	N30-N39	M45-M49	NA	NA	NA	2133	4.92055
	K20-K31	J20-J22	NA	NA	NA	2011	4.92055
	J40-J47	K90-K93	NA	NA	NA	1787	4.92055
	M70-M79	H30-H36	NA	NA	NA	700	4.91918
	M50-M54	F40-F48	NA	NA	NA	1217	4.91781
	N70-N77	G90-G99	NA	NA	NA	165	4.91781
	E10-E14	M80-M85	NA	NA	NA	821	4.91507
	E00-E07	B95-B98	NA	NA	NA	1300	4.91096
	K20-K31	M05-M14	NA	NA	NA	5630	4.90959
	K20-K31	F40-F48	NA	NA	NA	2775	4.90959
	J40-J47	H30-H36	NA	NA	NA	844	4.90959
	G40-G47	K90-K93	NA	NA	NA	774	4.90959
	K00-K14	K90-K93	NA	NA	NA	756	4.90274
	N30-N39	F30-F39	NA	NA	NA	2458	4.9
	H00-H06	I30-I52	NA	NA	NA	765	4.89863
	G50-G59	I60-I69	NA	NA	NA	498	4.89726
	M70-M79	D50-D53	NA	NA	NA	1322	4.89589
	M70-M79	H25-H28	NA	NA	NA	2258	4.89041
	M20-M25	B95-B98	NA	NA	NA	1860	4.88904
	J40-J47	M45-M49	NA	NA	NA	2264	4.88493
	J40-J47	M80-M85	NA	NA	NA	2188	4.88219
	K20-K31	M40-M43	NA	NA	NA	1060	4.88219
	E10-E14	J09-J18	NA	NA	NA	935	4.88219
	M70-M79	H90-H95	NA	NA	NA	541	4.87671
	H00-H06	F30-F39	NA	NA	NA	531	4.87397
	K40-K46	I30-I52	NA	NA	NA	2997	4.87123
	K50-K52	K40-K46	NA	NA	NA	2969	4.87123
	G50-G59	D60-D64	NA	NA	NA	1144	4.87123
	M70-M79	K70-K77	NA	NA	NA	671	4.87123
	E10-E14	M05-M14	NA	NA	NA	1810	4.86986
	K00-K14	J95-J99	NA	NA	NA	400	4.86849
	K40-K46	E65-E68	NA	NA	NA	2472	4.86575
	M20-M25	D60-D64	NA	NA	NA	1943	4.85753
	M70-M79	K90-K93	NA	NA	NA	1437	4.85479
	L80-L99	M45-M49	NA	NA	NA	1006	4.85479
	K40-K46	H40-H42	NA	NA	NA	587	4.85479
	I20-I25	A00-A09	NA	NA	NA	1129	4.85205
	G50-G59	J20-J22	NA	NA	NA	613	4.85205
	I10-I15	C76-C80	A30-A49	NA	NA	274	4.85205
	K50-K52	J09-J18	NA	NA	NA	992	4.84932
	G50-G59	M80-M85	NA	NA	NA	1110	4.84795
	K80-K87	I30-I52	NA	NA	NA	1658	4.84658
	I10-I15	K40-K46	NA	NA	NA	8835	4.83836
	I10-I15	G40-G47	NA	NA	NA	3120	4.83836
	E10-E14	B95-B98	NA	NA	NA	1272	4.83836
	I10-I15	J09-J18	NA	NA	NA	2699	4.83014
	M70-M79	I30-I52	NA	NA	NA	2442	4.83014
	I80-I89	J20-J22	NA	NA	NA	1060	4.82877
	K80-K87	M05-M14	NA	NA	NA	1915	4.8274
	J40-J47	G90-G99	NA	NA	NA	617	4.8274
	J40-J47	I70-I79	NA	NA	NA	978	4.82603
	K20-K31	I30-I52	NA	NA	NA	5031	4.82466
	I10-I15	I60-I69	NA	NA	NA	2153	4.82466
	J40-J47	A00-A09	NA	NA	NA	1763	4.82466
	K40-K46	J09-J18	NA	NA	NA	1434	4.82192
	I20-I25	K90-K93	NA	NA	NA	1213	4.82192
	I10-I15	H53-H54	NA	NA	NA	1114	4.82192
	J40-J47	H90-H95	NA	NA	NA	685	4.81918
	I80-I89	J09-J18	NA	NA	NA	1270	4.81781
	K55-K64	H25-H28	NA	NA	NA	5168	4.80822
	E10-E14	I30-I52	NA	NA	NA	1835	4.80548
	K40-K46	J95-J99	NA	NA	NA	899	4.80548
	M20-M25	M80-M85	NA	NA	NA	2068	4.80137
	M20-M25	F30-F39	NA	NA	NA	2329	4.79726
	M70-M79	J09-J18	NA	NA	NA	1236	4.79589
	E00-E07	N17-N19	NA	NA	NA	1212	4.79589
	I10-I15	M70-M79	NA	NA	NA	6634	4.79178
	E10-E14	A00-A09	NA	NA	NA	1016	4.79178
	C50-C50	J09-J18	NA	NA	NA	633	4.7863
	G50-G59	E70-E90	NA	NA	NA	2979	4.78356
	J40-J47	D50-D53	NA	NA	NA	1650	4.78356
	M20-M25	L00-L08	NA	NA	NA	1259	4.78356
	G50-G59	F30-F39	NA	NA	NA	1535	4.77808
	L80-L99	F40-F48	NA	NA	NA	673	4.77534
	J40-J47	M15-M19	NA	NA	NA	5986	4.77123
	G50-G59	I95-I99	NA	NA	NA	505	4.76986
	H00-H06	M45-M49	NA	NA	NA	535	4.76712
	J40-J47	B95-B98	NA	NA	NA	2237	4.76164
	K20-K31	I95-I99	NA	NA	NA	1497	4.76164
	D10-D36	K65-K67	NA	NA	NA	851	4.76164
	I20-I25	K70-K77	NA	NA	NA	530	4.76164
	K40-K46	F30-F39	NA	NA	NA	2455	4.7589
	L80-L99	D50-D53	NA	NA	NA	728	4.75753
	C43-C44	C15-C26	NA	NA	NA	222	4.75753
	B95-B98	H25-H28	NA	NA	NA	1337	4.75616
	M65-M68	M45-M49	NA	NA	NA	759	4.75342
	J40-J47	I95-I99	NA	NA	NA	956	4.75205
	L80-L99	F10-F19	NA	NA	NA	762	4.74658
	M50-M54	H25-H28	NA	NA	NA	1858	4.74247
	K55-K64	G90-G99	NA	NA	NA	1033	4.74247
	K20-K31	N10-N16	NA	NA	NA	862	4.7411
	K20-K31	F10-F19	NA	NA	NA	2815	4.73973
	K40-K46	M45-M49	NA	NA	NA	2272	4.73973
	M70-M79	N17-N19	NA	NA	NA	1337	4.73699
	M50-M54	K90-K93	NA	NA	NA	1312	4.73562
	I20-I25	M40-M43	NA	NA	NA	421	4.73425
	K80-K87	N17-N19	NA	NA	NA	1012	4.72877
	K20-K31	J09-J18	NA	NA	NA	2327	4.72603
	N30-N39	M40-M43	NA	NA	NA	643	4.72603
	K55-K64	H40-H42	NA	NA	NA	1045	4.71781
	K50-K52	L00-L08	NA	NA	NA	796	4.71507
	J40-J47	J09-J18	NA	NA	NA	2154	4.7137
	J40-J47	H25-H28	NA	NA	NA	2989	4.71233
	K80-K87	D50-D53	NA	NA	NA	946	4.70822
	J40-J47	I30-I52	NA	NA	NA	3160	4.70685
	K40-K46	M80-M85	NA	NA	NA	2248	4.70274
	K80-K87	M80-M85	NA	NA	NA	1044	4.7
	J40-J47	D60-D64	NA	NA	NA	2059	4.69863
	I10-I15	A00-A09	NA	NA	NA	3072	4.69452
	M20-M25	H90-H95	NA	NA	NA	600	4.69178
	I10-I15	K55-K64	NA	NA	NA	14626	4.68767
	M70-M79	D60-D64	NA	NA	NA	1801	4.68493
	M20-M25	E70-E90	NA	NA	NA	4827	4.68219
	N30-N39	L80-L99	NA	NA	NA	1944	4.68219
	K80-K87	E65-E68	NA	NA	NA	1637	4.68219
	I20-I25	I60-I69	NA	NA	NA	998	4.68219
	G50-G59	H53-H54	NA	NA	NA	358	4.68082
	M70-M79	A00-A09	NA	NA	NA	1463	4.67945
	M20-M25	M40-M43	NA	NA	NA	913	4.67945
	M70-M79	E65-E68	NA	NA	NA	2129	4.67671
	E10-E14	F40-F48	NA	NA	NA	719	4.67397
	K50-K52	N10-N16	NA	NA	NA	383	4.67397
	I10-I15	M40-M43	NA	NA	NA	1218	4.6726
	D10-D36	D60-D64	NA	NA	NA	2317	4.67123
	E10-E14	J95-J99	NA	NA	NA	554	4.66849
	M50-M54	J09-J18	NA	NA	NA	1060	4.66301
	K55-K64	M45-M49	NA	NA	NA	3788	4.66164
	K50-K52	E70-E90	NA	NA	NA	3058	4.66164
	I20-I25	D60-D64	NA	NA	NA	1515	4.65479
	M50-M54	E65-E68	NA	NA	NA	1728	4.65342
	I10-I15	M05-M14	NA	NA	NA	6070	4.65205
	K00-K14	I30-I52	NA	NA	NA	1143	4.65205
	M70-M79	J20-J22	NA	NA	NA	1098	4.65205
	K55-K64	M05-M14	NA	NA	NA	5701	4.64932
	I10-I15	B95-B98	NA	NA	NA	3651	4.64932
	N30-N39	M80-M85	NA	NA	NA	1893	4.64932
	N30-N39	D50-D53	NA	NA	NA	1442	4.64932
	H00-H06	M05-M14	NA	NA	NA	904	4.64658
	I10-I15	E65-E68	NA	NA	NA	4421	4.64384
	M20-M25	M45-M49	NA	NA	NA	2887	4.64384
	M70-M79	H40-H42	NA	NA	NA	470	4.64384
	I10-I15	H25-H28	NA	NA	NA	6148	4.63288
	E10-E14	D60-D64	NA	NA	NA	1464	4.63014
	K80-K87	F10-F19	NA	NA	NA	991	4.63014
	K50-K52	J95-J99	NA	NA	NA	617	4.63014
	K55-K64	H90-H95	NA	NA	NA	1220	4.62877
	M50-M54	F30-F39	NA	NA	NA	2037	4.6274
	N30-N39	K90-K93	NA	NA	NA	1769	4.6274
	G50-G59	D50-D53	NA	NA	NA	910	4.6274
	K80-K87	F40-F48	NA	NA	NA	891	4.6274
	M15-M19	J20-J22	NA	NA	NA	1540	4.62603
	K00-K14	F40-F48	NA	NA	NA	712	4.62466
	K20-K31	I26-I28	NA	NA	NA	996	4.62329
	I10-I15	F30-F39	NA	NA	NA	3758	4.62192
	I10-I15	K90-K93	NA	NA	NA	3019	4.61918
	I10-I15	H90-H95	NA	NA	NA	1119	4.61918
	I10-I15	I95-I99	NA	NA	NA	1787	4.61644
	I10-I15	D50-D53	NA	NA	NA	2966	4.61507
	I80-I89	N17-N19	NA	NA	NA	1317	4.6137
	I20-I25	M45-M49	NA	NA	NA	1500	4.61096
	E00-E07	E65-E68	NA	NA	NA	1438	4.60959
	K20-K31	E70-E90	NA	NA	NA	9348	4.60548
	N70-N77	J20-J22	NA	NA	NA	274	4.60411
	L60-L75	M65-M68	NA	NA	NA	337	4.60274
	I20-I25	E65-E68	NA	NA	NA	1490	4.59726
	L00-L08	M40-M43	NA	NA	NA	195	4.58904
	K65-K67	I60-I69	NA	NA	NA	133	4.58904
	M20-M25	M05-M14	NA	NA	NA	4254	4.5863
	K55-K64	M80-M85	NA	NA	NA	3697	4.58356
	I10-I15	M80-M85	NA	NA	NA	3305	4.58356
	N30-N39	L00-L08	NA	NA	NA	1212	4.58356
	K40-K46	I26-I28	NA	NA	NA	626	4.58356
	M70-M79	J95-J99	NA	NA	NA	796	4.58219
	I10-I15	J20-J22	NA	NA	NA	2266	4.58082
	I20-I25	M80-M85	NA	NA	NA	1300	4.57808
	K20-K31	J95-J99	NA	NA	NA	1502	4.57534
	I10-I15	H30-H36	NA	NA	NA	1911	4.5726
	N60-N64	L80-L99	NA	NA	NA	598	4.5726
	K55-K64	H53-H54	NA	NA	NA	1063	4.56986
	K20-K31	D37-D48	NA	NA	NA	943	4.56986
	L00-L08	F40-F48	NA	NA	NA	440	4.56712
	I10-I15	M45-M49	NA	NA	NA	4089	4.56438
	J30-J39	A30-A49	NA	NA	NA	223	4.56438
	K55-K64	F30-F39	NA	NA	NA	4280	4.55753
	K40-K46	N17-N19	NA	NA	NA	1591	4.55068
	I80-I89	J95-J99	NA	NA	NA	817	4.54795
	N30-N39	I30-I52	NA	NA	NA	2884	4.54658
	I10-I15	F40-F48	NA	NA	NA	2650	4.54658
	H30-H36	A30-A49	NA	NA	NA	168	4.54658
	K20-K31	C76-C80	I26-I28	NA	NA	136	4.53836
	I20-I25	N10-N16	NA	NA	NA	342	4.53699
	K55-K64	I30-I52	NA	NA	NA	5200	4.53288
	I10-I15	K65-K67	NA	NA	NA	1144	4.53151
	K50-K52	K65-K67	NA	NA	NA	596	4.52466
	K55-K64	F40-F48	NA	NA	NA	2873	4.52329
	I20-I25	J20-J22	NA	NA	NA	1006	4.52329
	I10-I15	I70-I79	NA	NA	NA	1850	4.52192
	N70-N77	A30-A49	NA	NA	NA	201	4.52055
	E00-E07	F40-F48	NA	NA	NA	982	4.51918
	I20-I25	H53-H54	NA	NA	NA	466	4.51644
	K55-K64	I70-I79	NA	NA	NA	1623	4.51233
	K40-K46	E70-E90	NA	NA	NA	5639	4.50959
	M15-M19	I60-I69	NA	NA	NA	1274	4.50959
	N30-N39	K70-K77	NA	NA	NA	775	4.50959
	K80-K87	M40-M43	NA	NA	NA	338	4.50274
	J40-J47	E70-E90	NA	NA	NA	5131	4.50137
	I20-I25	F40-F48	NA	NA	NA	1031	4.50137
	I10-I15	J95-J99	NA	NA	NA	1747	4.49863
	M15-M19	A30-A49	NA	NA	NA	839	4.49863
	H30-H36	J09-J18	NA	NA	NA	322	4.49726
	I80-I89	B95-B98	NA	NA	NA	1872	4.49589
	N20-N23	F10-F19	NA	NA	NA	199	4.49589
	J40-J47	K70-K77	NA	NA	NA	804	4.49178
	K80-K87	J20-J22	NA	NA	NA	761	4.48767
	E10-E14	E65-E68	NA	NA	NA	1888	4.48493
	M50-M54	I30-I52	NA	NA	NA	1974	4.47808
	M50-M54	B95-B98	NA	NA	NA	1506	4.47808
	M50-M54	F10-F19	NA	NA	NA	1420	4.47671
	I20-I25	I26-I28	NA	NA	NA	495	4.47671
	I10-I15	M15-M19	NA	NA	NA	11392	4.47534
	I20-I25	B95-B98	NA	NA	NA	1406	4.47534
	K55-K64	J20-J22	NA	NA	NA	2153	4.46849
	J30-J39	D70-D77	NA	NA	NA	198	4.46712
	N30-N39	A00-A09	NA	NA	NA	1747	4.46575
	M15-M19	I95-I99	NA	NA	NA	1220	4.46301
	I10-I15	G90-G99	NA	NA	NA	1064	4.46027
	K50-K52	I95-I99	NA	NA	NA	639	4.45753
	K40-K46	F10-F19	NA	NA	NA	1567	4.45479
	I10-I15	D60-D64	NA	NA	NA	4034	4.45068
	K50-K52	K90-K93	NA	NA	NA	1522	4.44795
	H00-H06	F40-F48	NA	NA	NA	381	4.4411
	K55-K64	E65-E68	NA	NA	NA	3495	4.43836
	M50-M54	A00-A09	NA	NA	NA	1330	4.43836
	N20-N23	E70-E90	NA	NA	NA	605	4.43836
	M50-M54	J95-J99	NA	NA	NA	636	4.43562
	I20-I25	J09-J18	NA	NA	NA	1130	4.43425
	M70-M79	I26-I28	NA	NA	NA	583	4.43014
	H00-H06	M40-M43	NA	NA	NA	152	4.42877
	M50-M54	D50-D53	NA	NA	NA	1107	4.42466
	K40-K46	A00-A09	NA	NA	NA	1802	4.42192
	I20-I25	D50-D53	NA	NA	NA	1139	4.4137
	M50-M54	I95-I99	NA	NA	NA	735	4.41096
	G40-G47	I95-I99	NA	NA	NA	427	4.40822
	M15-M19	J09-J18	NA	NA	NA	1787	4.40274
	L80-L99	K90-K93	NA	NA	NA	805	4.39726
	G40-G47	N17-N19	NA	NA	NA	638	4.39589
	C43-C44	N17-N19	NA	NA	NA	361	4.3863
	K80-K87	C76-C80	N17-N19	NA	NA	116	4.38493
	K00-K14	E70-E90	NA	NA	NA	2072	4.38356
	K55-K64	M40-M43	NA	NA	NA	1105	4.38356
	M15-M19	B95-B98	NA	NA	NA	2582	4.37808
	K50-K52	J20-J22	NA	NA	NA	819	4.37808
	K80-K87	C76-C80	D70-D77	NA	NA	165	4.37534
	M15-M19	D50-D53	NA	NA	NA	2071	4.36712
	C50-C50	B95-B98	NA	NA	NA	857	4.36438
	M70-M79	F10-F19	NA	NA	NA	1450	4.3589
	H30-H36	I95-I99	NA	NA	NA	222	4.35479
	E00-E07	K65-K67	NA	NA	NA	429	4.34795
	E00-E07	K90-K93	NA	NA	NA	1148	4.3411
	E00-E07	D50-D53	NA	NA	NA	1273	4.33699
	I10-I15	K70-K77	NA	NA	NA	1482	4.33562
	N70-N77	D70-D77	NA	NA	NA	222	4.33425
	K00-K14	A00-A09	NA	NA	NA	689	4.33151
	E00-E07	A00-A09	NA	NA	NA	1161	4.32877
	I10-I15	F10-F19	NA	NA	NA	2622	4.31781
	K20-K31	C76-C80	A30-A49	NA	NA	262	4.31644
	M50-M54	D60-D64	NA	NA	NA	1445	4.31507
	N30-N39	J20-J22	NA	NA	NA	1356	4.30959
	K55-K64	J09-J18	NA	NA	NA	2559	4.30137
	K20-K31	K65-K67	NA	NA	NA	1317	4.30137
	G50-G59	I70-I79	NA	NA	NA	552	4.30137
	M15-M19	N17-N19	NA	NA	NA	2108	4.29863
	K40-K46	M40-M43	NA	NA	NA	656	4.29589
	M15-M19	H25-H28	NA	NA	NA	4622	4.29178
	K55-K64	A00-A09	NA	NA	NA	3289	4.28219
	J40-J47	J95-J99	NA	NA	NA	1470	4.28219
	M70-M79	I95-I99	NA	NA	NA	769	4.27945
	M15-M19	D60-D64	NA	NA	NA	2757	4.27397
	I80-I89	J90-J94	NA	NA	NA	810	4.26986
	N20-N23	J95-J99	NA	NA	NA	107	4.26849
	K55-K64	F10-F19	NA	NA	NA	2996	4.26164
	M70-M79	I60-I69	NA	NA	NA	774	4.26164
	M50-M54	N17-N19	NA	NA	NA	1176	4.26027
	E10-E14	J90-J94	NA	NA	NA	477	4.26027
	E00-E07	J20-J22	NA	NA	NA	762	4.25753
	K55-K64	E70-E90	NA	NA	NA	9380	4.25616
	E10-E14	K90-K93	NA	NA	NA	849	4.25205
	I80-I89	N10-N16	NA	NA	NA	502	4.24658
	J40-J47	J20-J22	NA	NA	NA	1862	4.24384
	K20-K31	K90-K93	NA	NA	NA	3422	4.23425
	I20-I25	H90-H95	NA	NA	NA	408	4.22329
	I80-I89	I95-I99	NA	NA	NA	902	4.21644
	I10-I15	I26-I28	NA	NA	NA	1219	4.2137
	D10-D36	D37-D48	NA	NA	NA	916	4.20685
	M70-M79	J90-J94	NA	NA	NA	623	4.20548
	K40-K46	I95-I99	NA	NA	NA	899	4.20274
	K20-K31	A00-A09	NA	NA	NA	3044	4.20137
	G40-G47	A30-A49	NA	NA	NA	310	4.20137
	K00-K14	J09-J18	NA	NA	NA	607	4.2
	E00-E07	K70-K77	NA	NA	NA	529	4.19726
	E00-E07	J09-J18	NA	NA	NA	924	4.19315
	N30-N39	N17-N19	NA	NA	NA	1759	4.18356
	L80-L99	A00-A09	NA	NA	NA	814	4.18356
	K00-K14	N17-N19	NA	NA	NA	607	4.18082
	I10-I15	I30-I52	NA	NA	NA	6698	4.17534
	I10-I15	J90-J94	NA	NA	NA	1619	4.17534
	K55-K64	J95-J99	NA	NA	NA	1617	4.17534
	K50-K52	B95-B98	NA	NA	NA	1375	4.1726
	E10-E14	K70-K77	NA	NA	NA	646	4.1726
	G40-G47	J09-J18	NA	NA	NA	711	4.16438
	N70-N77	J90-J94	NA	NA	NA	195	4.1589
	K55-K64	N17-N19	NA	NA	NA	2759	4.15342
	M15-M19	M40-M43	NA	NA	NA	1203	4.15342
	E00-E07	D60-D64	NA	NA	NA	1508	4.14521
	K00-K14	J90-J94	NA	NA	NA	347	4.13425
	K20-K31	K70-K77	NA	NA	NA	1575	4.12603
	K80-K87	D60-D64	NA	NA	NA	1264	4.12603
	K80-K87	K90-K93	NA	NA	NA	1245	4.12329
	M05-M14	M40-M43	NA	NA	NA	697	4.10959
	M70-M79	F40-F48	NA	NA	NA	1429	4.10685
	N20-N23	N17-N19	NA	NA	NA	215	4.10685
	M15-M19	A00-A09	NA	NA	NA	2205	4.10411
	N30-N39	J09-J18	NA	NA	NA	1613	4.10411
	K50-K52	A30-A49	NA	NA	NA	594	4.09178
	J40-J47	A30-A49	NA	NA	NA	859	4.09041
	I20-I25	I95-I99	NA	NA	NA	861	4.07671
	K55-K64	I26-I28	NA	NA	NA	1095	4.06849
	I20-I25	I70-I79	NA	NA	NA	960	4.06027
	E10-E14	A30-A49	NA	NA	NA	536	4.06027
	K50-K52	D60-D64	NA	NA	NA	1456	4.05205
	N70-N77	D60-D64	NA	NA	NA	545	4.04658
	M15-M19	J90-J94	NA	NA	NA	904	4.03973
	N30-N39	K65-K67	NA	NA	NA	740	4.03836
	M05-M14	D50-D53	NA	NA	NA	1256	4.03699
	E00-E07	I95-I99	NA	NA	NA	659	4.03562
	I20-I25	D70-D77	NA	NA	NA	385	4.03288
	I10-I15	A30-A49	NA	NA	NA	1454	4.03151
	L80-L99	N17-N19	NA	NA	NA	834	4.03151
	J40-J47	J90-J94	NA	NA	NA	956	4.00959
	M70-M79	M40-M43	NA	NA	NA	818	4.00411
	I10-I15	C76-C80	D70-D77	NA	NA	322	4.00274
	M15-M19	C76-C80	NA	NA	NA	1344	4.00137
	C50-C50	D60-D64	NA	NA	NA	866	3.98493
	K55-K64	K70-K77	NA	NA	NA	1488	3.98219
	H25-H28	A30-A49	NA	NA	NA	501	3.9726
	M15-M19	J95-J99	NA	NA	NA	1094	3.96986
	I80-I89	A30-A49	NA	NA	NA	751	3.96164
	H30-H36	A00-A09	NA	NA	NA	332	3.9589
	K80-K87	J09-J18	NA	NA	NA	917	3.95068
	H30-H36	J95-J99	NA	NA	NA	181	3.95068
	K50-K52	J90-J94	NA	NA	NA	586	3.94521
	K80-K87	I26-I28	NA	NA	NA	407	3.94521
	C51-C58	I70-I79	NA	NA	NA	114	3.94384
	C43-C44	C76-C80	NA	NA	NA	492	3.93562
	C50-C50	I26-I28	NA	NA	NA	337	3.93425
	J30-J39	J95-J99	NA	NA	NA	303	3.93151
	K55-K64	I95-I99	NA	NA	NA	1658	3.9274
	K40-K46	A30-A49	NA	NA	NA	715	3.92603
	I20-I25	J95-J99	NA	NA	NA	757	3.92329
	K80-K87	J95-J99	NA	NA	NA	573	3.92329
	M15-M19	I26-I28	NA	NA	NA	845	3.91233
	K00-K14	I95-I99	NA	NA	NA	374	3.90959
	N20-N23	I26-I28	NA	NA	NA	57	3.90685
	K20-K31	A30-A49	NA	NA	NA	1177	3.88767
	N70-N77	N10-N16	NA	NA	NA	171	3.88767
	K20-K31	D70-D77	NA	NA	NA	1110	3.8863
	M05-M14	J09-J18	NA	NA	NA	1166	3.85616
	J40-J47	I26-I28	NA	NA	NA	702	3.85342
	G40-G47	A00-A09	NA	NA	NA	741	3.84384
	K20-K31	C15-C26	J90-J94	NA	NA	110	3.82603
	H25-H28	J90-J94	NA	NA	NA	527	3.82466
	L80-L99	I95-I99	NA	NA	NA	526	3.82466
	K20-K31	J90-J94	NA	NA	NA	1300	3.80685
	N30-N39	I95-I99	NA	NA	NA	984	3.8
	H25-H28	I95-I99	NA	NA	NA	641	3.79178
	K80-K87	I95-I99	NA	NA	NA	538	3.78493
	K20-K31	C76-C80	NA	NA	NA	2074	3.77671
	N30-N39	J95-J99	NA	NA	NA	939	3.76164
	M05-M14	N17-N19	NA	NA	NA	1374	3.75205
	C51-C58	K50-K52	NA	NA	NA	320	3.74932
	K20-K31	C15-C26	D70-D77	NA	NA	112	3.74932
	K40-K46	C76-C80	NA	NA	NA	1190	3.74521
	I10-I15	E70-E90	NA	NA	NA	10599	3.74247
	I70-I79	A00-A09	NA	NA	NA	428	3.73699
	J40-J47	D70-D77	NA	NA	NA	711	3.73425
	H53-H54	A00-A09	NA	NA	NA	259	3.72877
	M70-M79	D70-D77	NA	NA	NA	524	3.72603
	H53-H54	J09-J18	NA	NA	NA	274	3.72329
	M70-M79	A30-A49	NA	NA	NA	636	3.7137
	K80-K87	A00-A09	NA	NA	NA	1278	3.71233
	K40-K46	J90-J94	NA	NA	NA	774	3.70822
	K40-K46	K70-K77	NA	NA	NA	951	3.70411
	H25-H28	J09-J18	NA	NA	NA	986	3.6726
	I80-I89	D70-D77	NA	NA	NA	768	3.67123
	H30-H36	J90-J94	NA	NA	NA	173	3.67123
	M05-M14	J90-J94	NA	NA	NA	535	3.65205
	M50-M54	J90-J94	NA	NA	NA	508	3.64932
	M05-M14	A30-A49	NA	NA	NA	596	3.64384
	H25-H28	N17-N19	NA	NA	NA	1267	3.63288
	M45-M49	J09-J18	NA	NA	NA	713	3.63014
	C50-C50	L80-L99	NA	NA	NA	1197	3.62192
	G40-G47	J90-J94	NA	NA	NA	348	3.61507
	M05-M14	J95-J99	NA	NA	NA	713	3.60822
	C50-C50	J20-J22	NA	NA	NA	519	3.6
	I20-I25	A30-A49	NA	NA	NA	518	3.6
	H30-H36	N17-N19	NA	NA	NA	472	3.58493
	E00-E07	J95-J99	NA	NA	NA	604	3.54795
	D37-D48	A00-A09	NA	NA	NA	293	3.54795
	N30-N39	J90-J94	NA	NA	NA	889	3.54521
	M45-M49	J95-J99	NA	NA	NA	450	3.53699
	M45-M49	I95-I99	NA	NA	NA	510	3.52877
	M05-M14	I95-I99	NA	NA	NA	694	3.5274
	N60-N64	C76-C80	NA	NA	NA	493	3.52329
	K55-K64	A30-A49	NA	NA	NA	1447	3.50959
	E70-E90	N17-N19	NA	NA	NA	2603	3.50137
	M05-M14	A00-A09	NA	NA	NA	1318	3.5
	M45-M49	A30-A49	NA	NA	NA	350	3.49863
	H25-H28	J95-J99	NA	NA	NA	619	3.48219
	N10-N16	F40-F48	NA	NA	NA	194	3.48082
	E00-E07	J90-J94	NA	NA	NA	563	3.45479
	M45-M49	N17-N19	NA	NA	NA	904	3.44384
	F30-F39	J09-J18	NA	NA	NA	920	3.4411
	I10-I15	C76-C80	NA	NA	NA	2335	3.43562
	K20-K31	C15-C26	C76-C80	NA	NA	377	3.43014
	D00-D09	A30-A49	NA	NA	NA	132	3.41233
	E10-E14	C76-C80	NA	NA	NA	664	3.39452
	K80-K87	D70-D77	NA	NA	NA	452	3.39178
	D37-D48	N17-N19	NA	NA	NA	264	3.38767
	M50-M54	A30-A49	NA	NA	NA	523	3.3863
	C51-C58	L00-L08	NA	NA	NA	188	3.3863
	K55-K64	K65-K67	NA	NA	NA	1587	3.37534
	D37-D48	J20-J22	NA	NA	NA	191	3.37534
	H40-H42	I95-I99	NA	NA	NA	110	3.37123
	L00-L08	N17-N19	NA	NA	NA	635	3.34795
	K20-K31	K80-K87	NA	NA	NA	6330	3.34658
	H25-H28	A00-A09	NA	NA	NA	1036	3.33425
	L00-L08	A00-A09	NA	NA	NA	542	3.31233
	N60-N64	D70-D77	NA	NA	NA	225	3.30685
	J40-J47	C76-C80	NA	NA	NA	1159	3.29315
	D50-D53	C76-C80	J95-J99	NA	NA	44	3.26301
	K55-K64	J90-J94	NA	NA	NA	1523	3.25205
	C51-C58	I30-I52	NA	NA	NA	350	3.25205
	D10-D36	C15-C26	NA	NA	NA	1050	3.24932
	M45-M49	J90-J94	NA	NA	NA	362	3.23699
	I10-I15	D70-D77	NA	NA	NA	1212	3.23562
	E00-E07	A30-A49	NA	NA	NA	490	3.23562
	M05-M14	D70-D77	NA	NA	NA	464	3.22603
	C51-C58	K55-K64	NA	NA	NA	1185	3.21644
	I30-I52	A00-A09	NA	NA	NA	1275	3.20548
	M80-M85	A00-A09	NA	NA	NA	873	3.19726
	E65-E68	A30-A49	NA	NA	NA	365	3.18904
	K55-K64	D70-D77	NA	NA	NA	1329	3.1863
	C51-C58	K90-K93	NA	NA	NA	250	3.18219
	F30-F39	N17-N19	NA	NA	NA	879	3.16438
	E65-E68	A00-A09	NA	NA	NA	760	3.16164
	E70-E90	A00-A09	NA	NA	NA	2213	3.14247
	F30-F39	J95-J99	NA	NA	NA	589	3.14247
	C51-C58	D60-D64	A30-A49	NA	NA	67	3.13151
	M45-M49	A00-A09	NA	NA	NA	870	3.11918
	I30-I52	N17-N19	NA	NA	NA	1722	3.08767
	I70-I79	A30-A49	NA	NA	NA	258	3.08356
	I30-I52	I95-I99	NA	NA	NA	1014	3.04658
	E00-E07	D70-D77	NA	NA	NA	493	3.0274
	K80-K87	C76-C80	NA	NA	NA	934	3.02603
	E10-E14	D70-D77	NA	NA	NA	350	3.02329
	C51-C58	N30-N39	NA	NA	NA	559	3.0137
	C51-C58	J20-J22	NA	NA	NA	173	2.98082
	F30-F39	A00-A09	NA	NA	NA	991	2.96712
	C51-C58	A00-A09	NA	NA	NA	269	2.96712
	E70-E90	J95-J99	NA	NA	NA	1411	2.93151
	M40-M43	N17-N19	NA	NA	NA	268	2.93151
	K80-K87	J90-J94	NA	NA	NA	569	2.92877
	I20-I25	J90-J94	NA	NA	NA	729	2.89589
	I60-I69	J09-J18	NA	NA	NA	532	2.89589
	C51-C58	K70-K77	NA	NA	NA	99	2.88219
	N10-N16	A00-A09	NA	NA	NA	291	2.87671
	D50-D53	J95-J99	NA	NA	NA	426	2.86438
	D60-D64	A00-A09	NA	NA	NA	1053	2.85205
	C50-C50	L00-L08	NA	NA	NA	715	2.84932
	E65-E68	N17-N19	NA	NA	NA	914	2.82466
	C51-C58	E70-E90	NA	NA	NA	728	2.81507
	M80-M85	A30-A49	NA	NA	NA	435	2.7863
	D37-D48	J09-J18	NA	NA	NA	289	2.76438
	E65-E68	J90-J94	NA	NA	NA	327	2.71507
	F30-F39	A30-A49	NA	NA	NA	433	2.70959
	F10-F19	I95-I99	NA	NA	NA	415	2.69041
	D50-D53	A30-A49	NA	NA	NA	365	2.66849
	C51-C58	J09-J18	NA	NA	NA	218	2.62466
	K65-K67	A00-A09	NA	NA	NA	384	2.59863
	C51-C58	B95-B98	NA	NA	NA	299	2.56164
	K20-K31	C15-C26	NA	NA	NA	1276	2.56027
	K80-K87	A30-A49	NA	NA	NA	568	2.52877
	C51-C58	N17-N19	NA	NA	NA	283	2.49589
	F10-F19	J95-J99	NA	NA	NA	574	2.49452
	J20-J22	J09-J18	NA	NA	NA	1075	2.46027
	C15-C26	I30-I52	NA	NA	NA	470	2.44521
	F10-F19	N17-N19	NA	NA	NA	645	2.38356
	F10-F19	A30-A49	NA	NA	NA	312	2.36301
	D50-D53	N17-N19	NA	NA	NA	829	2.34521
	C43-C44	L80-L99	NA	NA	NA	1448	2.3411
	C51-C58	I95-I99	NA	NA	NA	152	2.33014
	D37-D48	I95-I99	NA	NA	NA	173	2.29041
	C51-C58	N10-N16	NA	NA	NA	208	2.2411
	F10-F19	J90-J94	NA	NA	NA	364	2.23151
	K70-K77	I95-I99	NA	NA	NA	301	2.22192
	D37-D48	A30-A49	NA	NA	NA	195	2.15342
	D37-D48	J95-J99	NA	NA	NA	192	2.13973
	D50-D53	C76-C80	NA	NA	NA	448	2.04932
	C76-C80	L00-L08	NA	NA	NA	576	2.03562
	D37-D48	J90-J94	NA	NA	NA	205	2.03562
	C76-C80	K90-K93	NA	NA	NA	637	2.03014
	D37-D48	C15-C26	C76-C80	NA	NA	98	2.00548
	C51-C58	J95-J99	NA	NA	NA	148	1.93151
	C15-C26	N10-N16	NA	NA	NA	144	1.93151
	C51-C58	I26-I28	NA	NA	NA	160	1.82877
	D00-D09	D70-D77	NA	NA	NA	161	1.81096
	C51-C58	A30-A49	NA	NA	NA	218	1.78082
	D37-D48	C76-C80	NA	NA	NA	383	1.77534
	C15-C26	C76-C80	N17-N19	NA	NA	130	1.76712
	C76-C80	B95-B98	NA	NA	NA	941	1.66301
	C76-C80	I95-I99	NA	NA	NA	461	1.6274
	C15-C26	J20-J22	NA	NA	NA	211	1.6
	C15-C26	B95-B98	NA	NA	NA	476	1.46027
	C15-C26	J09-J18	NA	NA	NA	339	1.41918
	C15-C26	E70-E90	NA	NA	NA	956	1.39726
	D60-D64	A30-A49	NA	NA	NA	752	1.39589
	C76-C80	N17-N19	NA	NA	NA	728	1.36164
	C15-C26	N17-N19	NA	NA	NA	371	1.3589
	C50-C50	C76-C80	NA	NA	NA	1796	1.35068
	N80-N98	C51-C58	NA	NA	NA	1365	1.31507
	C51-C58	J90-J94	NA	NA	NA	280	1.31233
	C15-C26	C76-C80	D70-D77	NA	NA	159	1.25205
	C15-C26	J95-J99	NA	NA	NA	242	1.24247
	C76-C80	A00-A09	NA	NA	NA	737	1.22466
	C51-C58	D60-D64	NA	NA	NA	494	1.16712
	C76-C80	J20-J22	NA	NA	NA	658	1.15479
	C15-C26	I95-I99	NA	NA	NA	236	1.09178
	C76-C80	J09-J18	NA	NA	NA	887	1.08219
	C15-C26	K90-K93	NA	NA	NA	581	1.06849
	C76-C80	J95-J99	NA	NA	NA	568	0.984932
	C15-C26	K65-K67	NA	NA	NA	337	0.969863
	C15-C26	A00-A09	NA	NA	NA	424	0.956164
	C76-C80	J90-J94	NA	NA	NA	991	0.939726
	C76-C80	D60-D64	NA	NA	NA	1277	0.936986
	C15-C26	J90-J94	NA	NA	NA	311	0.860274
	C15-C26	D60-D64	NA	NA	NA	601	0.808219
	C76-C80	I26-I28	NA	NA	NA	518	0.79589
	C51-C58	D70-D77	NA	NA	NA	269	0.786301
	C15-C26	I26-I28	NA	NA	NA	229	0.673973
	C15-C26	A30-A49	NA	NA	NA	345	0.59726
	C15-C26	D70-D77	NA	NA	NA	351	0.556164
	C50-C50	A30-A49	NA	NA	NA	827	0.531507
	C76-C80	A30-A49	NA	NA	NA	943	0.482192
	C76-C80	D70-D77	NA	NA	NA	1270	0.368493
	C50-C50	D70-D77	NA	NA	NA	1270	0.361644
	C15-C26	C76-C80	NA	NA	NA	1232	0.249315
	D37-D48	C15-C26	NA	NA	NA	311	0.178082

## Sheet: 7. M diagnosis trajectories
	Diagnosis 1	Diagnosis 2	Diagnosis 3	Diagnosis 4	Diagnosis 5	Number of patients with trajectory	Median length of time of trajectory in years
	I10-I15	K55-K64	NA	NA	NA	16175	4.28219
	I10-I15	K20-K31	NA	NA	NA	14888	4.90959
	I10-I15	E70-E90	NA	NA	NA	14849	3.58082
	K20-K31	K55-K64	NA	NA	NA	12880	4.52192
	I10-I15	I30-I52	NA	NA	NA	11823	4.2411
	K40-K46	K55-K64	NA	NA	NA	11156	4.73699
	K20-K31	E70-E90	NA	NA	NA	10740	4.60274
	I10-I15	N40-N51	NA	NA	NA	9939	4.54521
	I10-I15	M15-M19	NA	NA	NA	9802	4.58082
	K40-K46	E70-E90	NA	NA	NA	8924	4.92466
	I20-I25	K55-K64	NA	NA	NA	8568	4.97534
	I10-I15	I80-I89	NA	NA	NA	8001	4.94247
	I10-I15	N30-N39	NA	NA	NA	7560	4.41918
	K20-K31	M15-M19	NA	NA	NA	7304	5.07808
	K20-K31	I30-I52	NA	NA	NA	7214	4.89041
	K20-K31	N40-N51	NA	NA	NA	7021	5.26027
	K40-K46	M15-M19	NA	NA	NA	6638	5.00411
	I10-I15	M70-M79	NA	NA	NA	6637	4.69315
	E10-E14	E70-E90	NA	NA	NA	6299	4.31507
	K40-K46	I30-I52	NA	NA	NA	6254	5.16986
	I10-I15	H25-H28	NA	NA	NA	5976	4.72466
	I10-I15	N17-N19	NA	NA	NA	5874	4.9274
	I10-I15	M05-M14	NA	NA	NA	5858	4.37808
	I80-I89	E70-E90	NA	NA	NA	5683	4.68767
	D10-D36	E70-E90	NA	NA	NA	5546	4.8
	E10-E14	K55-K64	NA	NA	NA	5493	4.79178
	M20-M25	K55-K64	NA	NA	NA	5316	5.10822
	I20-I25	M15-M19	NA	NA	NA	5268	5.2726
	I20-I25	N40-N51	NA	NA	NA	5168	5.34658
	E10-E14	K20-K31	NA	NA	NA	5128	5.38493
	K20-K31	M70-M79	NA	NA	NA	5016	5.19726
	K20-K31	N30-N39	NA	NA	NA	4981	5.10685
	I10-I15	F10-F19	NA	NA	NA	4922	4.12192
	I10-I15	M50-M54	NA	NA	NA	4844	4.78356
	I10-I15	K20-K31	E70-E90	NA	NA	4736	7.81233
	K40-K46	N30-N39	NA	NA	NA	4715	4.91507
	I10-I15	G40-G47	NA	NA	NA	4611	4.88493
	I10-I15	B95-B98	NA	NA	NA	4490	4.3863
	K55-K64	M05-M14	NA	NA	NA	4459	4.13699
	I10-I15	E65-E68	NA	NA	NA	4273	4.46301
	I10-I15	J09-J18	NA	NA	NA	4263	4.49041
	E70-E90	N17-N19	NA	NA	NA	4238	3.75479
	I10-I15	D60-D64	NA	NA	NA	4191	4.00274
	I80-I89	M15-M19	NA	NA	NA	4163	5.15342
	K20-K31	M05-M14	NA	NA	NA	4088	5.08767
	E10-E14	I30-I52	NA	NA	NA	4086	4.99178
	K20-K31	F10-F19	NA	NA	NA	4073	4.44658
	I10-I15	L80-L99	NA	NA	NA	4066	4.95068
	I80-I89	I30-I52	NA	NA	NA	4019	5
	I20-I25	N30-N39	NA	NA	NA	3892	5.24658
	I10-I15	K50-K52	NA	NA	NA	3864	4.64795
	I10-I15	K90-K93	NA	NA	NA	3829	4.36438
	K20-K31	M50-M54	NA	NA	NA	3788	5.49452
	I10-I15	I70-I79	NA	NA	NA	3739	4.2411
	K55-K64	N17-N19	NA	NA	NA	3674	3.69726
	K20-K31	H25-H28	NA	NA	NA	3647	5.38356
	I10-I15	K20-K31	I30-I52	NA	NA	3646	8.55753
	I10-I15	G50-G59	NA	NA	NA	3624	4.71096
	I20-I25	M70-M79	NA	NA	NA	3559	5.15342
	I10-I15	M45-M49	NA	NA	NA	3517	4.39452
	E70-E90	B95-B98	NA	NA	NA	3507	3.57534
	I20-I25	H25-H28	NA	NA	NA	3485	5.89863
	I10-I15	L00-L08	NA	NA	NA	3479	5.21918
	E70-E90	J09-J18	NA	NA	NA	3465	3.31507
	K40-K46	H25-H28	NA	NA	NA	3433	5.55068
	K40-K46	M05-M14	NA	NA	NA	3405	5.01096
	I30-I52	N17-N19	NA	NA	NA	3368	3.54384
	I10-I15	I60-I69	NA	NA	NA	3363	4.43014
	I20-I25	N17-N19	NA	NA	NA	3358	5.93836
	E70-E90	D60-D64	NA	NA	NA	3357	2.97534
	I20-I25	M05-M14	NA	NA	NA	3305	5.03562
	I10-I15	K80-K87	NA	NA	NA	3293	4.5726
	I10-I15	C43-C44	NA	NA	NA	3263	4.47945
	E10-E14	N40-N51	NA	NA	NA	3249	4.96712
	K20-K31	N17-N19	NA	NA	NA	3214	4.60274
	K55-K64	J09-J18	NA	NA	NA	3205	3.68219
	K20-K31	K80-K87	NA	NA	NA	3166	3.26986
	K40-K46	F10-F19	NA	NA	NA	3147	4.81644
	I10-I15	C60-C63	NA	NA	NA	3128	3.79315
	I80-I89	M70-M79	NA	NA	NA	3113	4.86575
	I10-I15	A00-A09	NA	NA	NA	3024	4.88082
	I10-I15	J20-J22	NA	NA	NA	3019	4.4411
	I10-I15	F30-F39	NA	NA	NA	2992	4.62192
	K20-K31	J09-J18	NA	NA	NA	2988	4.53425
	I10-I15	J90-J94	NA	NA	NA	2965	3.75342
	K20-K31	D60-D64	NA	NA	NA	2965	3.62466
	K40-K46	M50-M54	NA	NA	NA	2922	5.40959
	E70-E90	K90-K93	NA	NA	NA	2872	3.64384
	J30-J39	K20-K31	NA	NA	NA	2842	5.40959
	D10-D36	N30-N39	NA	NA	NA	2832	4.62603
	J30-J39	K55-K64	NA	NA	NA	2829	5.90685
	I10-I15	D50-D53	NA	NA	NA	2815	4.43562
	M20-M25	M05-M14	NA	NA	NA	2810	4.5137
	K50-K52	K40-K46	NA	NA	NA	2762	4.46164
	K55-K64	E65-E68	NA	NA	NA	2758	4.0274
	N40-N51	H25-H28	NA	NA	NA	2742	4.97397
	M15-M19	H25-H28	NA	NA	NA	2734	4.7
	K55-K64	M45-M49	NA	NA	NA	2714	4.51507
	I10-I15	I95-I99	NA	NA	NA	2707	4.39726
	K55-K64	A00-A09	NA	NA	NA	2701	3.8
	I20-I25	I70-I79	NA	NA	NA	2687	4.73151
	I20-I25	M50-M54	NA	NA	NA	2686	5.39041
	E10-E14	N30-N39	NA	NA	NA	2669	4.53151
	I10-I15	H30-H36	NA	NA	NA	2645	4.60274
	K20-K31	L80-L99	NA	NA	NA	2631	5.08767
	I20-I25	G40-G47	NA	NA	NA	2620	4.99315
	E10-E14	N17-N19	NA	NA	NA	2606	5.5137
	K20-K31	M45-M49	NA	NA	NA	2605	5.17808
	K55-K64	F30-F39	NA	NA	NA	2605	4.26849
	K40-K46	N17-N19	NA	NA	NA	2593	5.17808
	I20-I25	J09-J18	NA	NA	NA	2591	5.2137
	E10-E14	I80-I89	NA	NA	NA	2570	5.43973
	I10-I15	J95-J99	NA	NA	NA	2565	4.0137
	I10-I15	C76-C80	NA	NA	NA	2529	3.09315
	J30-J39	K40-K46	NA	NA	NA	2515	5.55068
	K20-K31	F30-F39	NA	NA	NA	2511	4.91233
	E10-E14	H25-H28	NA	NA	NA	2486	5.19178
	I20-I25	B95-B98	NA	NA	NA	2480	5.08356
	K20-K31	E65-E68	NA	NA	NA	2474	4.87808
	E70-E90	J90-J94	NA	NA	NA	2474	2.33973
	K40-K46	J09-J18	NA	NA	NA	2451	5.02466
	K55-K64	C76-C80	NA	NA	NA	2446	1.74247
	J40-J47	J09-J18	NA	NA	NA	2444	3.79726
	K40-K46	K80-K87	NA	NA	NA	2440	4.24521
	I10-I15	I80-I89	E70-E90	NA	NA	2429	7.64658
	I20-I25	D60-D64	NA	NA	NA	2415	4.57534
	E70-E90	J20-J22	NA	NA	NA	2406	3.30137
	I20-I25	E65-E68	NA	NA	NA	2398	4.73973
	I30-I52	D60-D64	NA	NA	NA	2374	3.08767
	K20-K31	A00-A09	NA	NA	NA	2369	4.11781
	E10-E14	M70-M79	NA	NA	NA	2359	5.31233
	K40-K46	D60-D64	NA	NA	NA	2352	4.34658
	E70-E90	A00-A09	NA	NA	NA	2332	3.69863
	K20-K31	I70-I79	NA	NA	NA	2317	4.86301
	K55-K64	J20-J22	NA	NA	NA	2311	3.83014
	I10-I15	K55-K64	N17-N19	NA	NA	2295	7.83562
	J30-J39	E70-E90	NA	NA	NA	2281	5.39452
	K20-K31	L00-L08	NA	NA	NA	2278	5.3137
	I10-I15	C15-C26	NA	NA	NA	2276	3.05342
	I80-I89	M05-M14	NA	NA	NA	2272	4.61918
	I10-I15	A30-A49	NA	NA	NA	2250	4.16164
	I10-I15	E70-E90	N17-N19	NA	NA	2247	7.86575
	N30-N39	N17-N19	NA	NA	NA	2232	3.04521
	I20-I25	K90-K93	NA	NA	NA	2222	4.7274
	K40-K46	C60-C63	NA	NA	NA	2210	4.67945
	K55-K64	J90-J94	NA	NA	NA	2207	3.22466
	N40-N51	C60-C63	NA	NA	NA	2202	2.50685
	N40-N51	N17-N19	NA	NA	NA	2201	4.23836
	E70-E90	I95-I99	NA	NA	NA	2201	3.01096
	I20-I25	I60-I69	NA	NA	NA	2197	5.11507
	K55-K64	I60-I69	NA	NA	NA	2176	4.19863
	I10-I15	K55-K64	M05-M14	NA	NA	2163	8.12329
	E10-E14	M05-M14	NA	NA	NA	2161	4.84932
	D10-D36	M05-M14	NA	NA	NA	2154	4.58219
	E70-E90	D50-D53	NA	NA	NA	2150	3.63014
	E10-E14	E65-E68	NA	NA	NA	2142	4.4274
	E70-E90	J95-J99	NA	NA	NA	2128	2.68082
	I30-I52	K90-K93	NA	NA	NA	2119	3.95068
	I20-I25	L80-L99	NA	NA	NA	2108	5.41644
	I80-I89	F10-F19	NA	NA	NA	2088	4.69178
	K40-K46	M45-M49	NA	NA	NA	2063	5.13425
	K20-K31	J20-J22	NA	NA	NA	2062	4.67123
	I10-I15	I30-I52	N17-N19	NA	NA	2059	8.20274
	M15-M19	B95-B98	NA	NA	NA	2052	4.44521
	K20-K31	J90-J94	NA	NA	NA	2049	4.39178
	I10-I15	K70-K77	NA	NA	NA	2034	4.38493
	M15-M19	N17-N19	NA	NA	NA	2033	4.53151
	K20-K31	I60-I69	NA	NA	NA	2028	5.03425
	K50-K52	I30-I52	NA	NA	NA	2022	4.61644
	I30-I52	J90-J94	NA	NA	NA	2009	2.18904
	I20-I25	J90-J94	NA	NA	NA	1991	3.29315
	I20-I25	L00-L08	NA	NA	NA	1988	5.29863
	I20-I25	J20-J22	NA	NA	NA	1981	4.38356
	K40-K46	L00-L08	NA	NA	NA	1972	5.31918
	J40-J47	N17-N19	NA	NA	NA	1971	3.77808
	I20-I25	M45-M49	NA	NA	NA	1933	5.15616
	I10-I15	F40-F48	NA	NA	NA	1926	4.37534
	N30-N39	H25-H28	NA	NA	NA	1920	4.47397
	I20-I25	G50-G59	NA	NA	NA	1919	5.59178
	K50-K52	N40-N51	NA	NA	NA	1917	4.70137
	J40-J47	B95-B98	NA	NA	NA	1914	3.97534
	K55-K64	I95-I99	NA	NA	NA	1902	3.25205
	I30-I52	J20-J22	NA	NA	NA	1901	3.30137
	K55-K64	J95-J99	NA	NA	NA	1894	3.27945
	K40-K46	I70-I79	NA	NA	NA	1893	5.09041
	K40-K46	E65-E68	NA	NA	NA	1891	5.59452
	C15-C26	E70-E90	NA	NA	NA	1878	1.82192
	I30-I52	I95-I99	NA	NA	NA	1876	2.92877
	C60-C63	N30-N39	NA	NA	NA	1875	2.27671
	K40-K46	A00-A09	NA	NA	NA	1870	4.94658
	K40-K46	F30-F39	NA	NA	NA	1866	4.96438
	I20-I25	K80-K87	NA	NA	NA	1856	5.19452
	M70-M79	F10-F19	NA	NA	NA	1856	4.46849
	E10-E14	B95-B98	NA	NA	NA	1848	4.87945
	E10-E14	D60-D64	NA	NA	NA	1846	4.8589
	E70-E90	A30-A49	NA	NA	NA	1816	2.70685
	K20-K31	C15-C26	NA	NA	NA	1816	2.53562
	I20-I25	I95-I99	NA	NA	NA	1805	4.58904
	E10-E14	F10-F19	NA	NA	NA	1803	4.78356
	J30-J39	M15-M19	NA	NA	NA	1802	5.91644
	I80-I89	N17-N19	NA	NA	NA	1801	4.33151
	K55-K64	A30-A49	NA	NA	NA	1782	2.7726
	K20-K31	I95-I99	NA	NA	NA	1780	4.2274
	I80-I89	B95-B98	NA	NA	NA	1767	4.55068
	D10-D36	K90-K93	NA	NA	NA	1767	4.07945
	N40-N51	J09-J18	NA	NA	NA	1766	4.5274
	K40-K46	D50-D53	NA	NA	NA	1763	4.5726
	K20-K31	K70-K77	NA	NA	NA	1763	3.87397
	K20-K31	C76-C80	NA	NA	NA	1754	2.66712
	C15-C26	C76-C80	NA	NA	NA	1753	0.290411
	I80-I89	L80-L99	NA	NA	NA	1748	4.73973
	N40-N51	K90-K93	NA	NA	NA	1746	4.14384
	K20-K31	J95-J99	NA	NA	NA	1745	4.18904
	M20-M25	F10-F19	NA	NA	NA	1744	5.29452
	N40-N51	M45-M49	NA	NA	NA	1744	4.59315
	N30-N39	J09-J18	NA	NA	NA	1740	3.17808
	N20-N23	K55-K64	NA	NA	NA	1738	5.01096
	M15-M19	D60-D64	NA	NA	NA	1718	4.08904
	I20-I25	F30-F39	NA	NA	NA	1709	5.01096
	K40-K46	J90-J94	NA	NA	NA	1705	4.79452
	I10-I15	K55-K64	J09-J18	NA	NA	1701	7.63562
	M15-M19	J09-J18	NA	NA	NA	1701	4.52877
	E10-E14	J09-J18	NA	NA	NA	1700	4.97808
	N40-N51	E65-E68	NA	NA	NA	1698	4.26712
	I20-I25	K00-K14	NA	NA	NA	1695	5.05205
	N40-N51	D60-D64	NA	NA	NA	1687	3.88493
	K40-K46	I60-I69	NA	NA	NA	1683	5.24658
	I20-I25	D50-D53	NA	NA	NA	1682	5.19041
	I20-I25	A00-A09	NA	NA	NA	1680	5.27808
	I30-I52	A00-A09	NA	NA	NA	1673	3.41918
	I80-I89	D60-D64	NA	NA	NA	1672	3.72055
	M20-M25	M45-M49	NA	NA	NA	1670	4.61781
	K50-K52	N30-N39	NA	NA	NA	1652	4.49178
	G50-G59	I30-I52	NA	NA	NA	1637	4.78904
	I10-I15	H90-H95	NA	NA	NA	1633	4.69315
	K20-K31	E70-E90	N17-N19	NA	NA	1632	8.01096
	K55-K64	K70-K77	NA	NA	NA	1628	3.66301
	J40-J47	K90-K93	NA	NA	NA	1627	4.32329
	J40-J47	D60-D64	NA	NA	NA	1625	3.8137
	K40-K46	J20-J22	NA	NA	NA	1620	5.54932
	K55-K64	F40-F48	NA	NA	NA	1615	4.07123
	N40-N51	C43-C44	NA	NA	NA	1612	5.13288
	I80-I89	J09-J18	NA	NA	NA	1603	4.56164
	J40-J47	J95-J99	NA	NA	NA	1600	3.55342
	E10-E14	L80-L99	NA	NA	NA	1594	5.51918
	I20-I25	J95-J99	NA	NA	NA	1591	4.44932
	D10-D36	N17-N19	NA	NA	NA	1587	4.61644
	M20-M25	E65-E68	NA	NA	NA	1580	5.02603
	K20-K31	F40-F48	NA	NA	NA	1571	4.97808
	M15-M19	K80-K87	NA	NA	NA	1565	5.00548
	E10-E14	L00-L08	NA	NA	NA	1560	5.68904
	D10-D36	B95-B98	NA	NA	NA	1547	4.79178
	J40-J47	E65-E68	NA	NA	NA	1547	4.18082
	I80-I89	E65-E68	NA	NA	NA	1544	4.7589
	N30-N39	D60-D64	NA	NA	NA	1544	2.96301
	J30-J39	D10-D36	NA	NA	NA	1539	5.2137
	I30-I52	D50-D53	NA	NA	NA	1532	3.46301
	I10-I15	I26-I28	NA	NA	NA	1528	3.91644
	N20-N23	E70-E90	NA	NA	NA	1512	5.23014
	I10-I15	K55-K64	E65-E68	NA	NA	1504	7.91781
	M70-M79	N17-N19	NA	NA	NA	1501	4.32603
	I10-I15	D37-D48	NA	NA	NA	1497	3.75068
	E10-E14	I70-I79	NA	NA	NA	1482	5.32877
	J30-J39	M20-M25	NA	NA	NA	1473	5.71233
	F10-F19	J09-J18	NA	NA	NA	1472	3.22466
	K20-K31	K55-K64	N17-N19	NA	NA	1471	8.28767
	K40-K46	C76-C80	NA	NA	NA	1470	3.89041
	N30-N39	K90-K93	NA	NA	NA	1470	3.8411
	H25-H28	N17-N19	NA	NA	NA	1455	3.60274
	J20-J22	J09-J18	NA	NA	NA	1448	1.99178
	K20-K31	A30-A49	NA	NA	NA	1442	4.00548
	J40-J47	J90-J94	NA	NA	NA	1440	3.0863
	E10-E14	G50-G59	NA	NA	NA	1439	5.28219
	D10-D36	J09-J18	NA	NA	NA	1427	4.67123
	K40-K46	I95-I99	NA	NA	NA	1425	4.93151
	E10-E14	K20-K31	I30-I52	NA	NA	1415	9.09041
	I10-I15	M80-M85	NA	NA	NA	1415	4.59452
	E10-E14	H30-H36	NA	NA	NA	1413	5.31507
	M20-M25	B95-B98	NA	NA	NA	1412	4.62877
	I80-I89	K80-K87	NA	NA	NA	1408	4.52192
	K40-K46	J95-J99	NA	NA	NA	1405	4.75342
	I20-I25	K55-K64	N17-N19	NA	NA	1404	9.00822
	N40-N51	I60-I69	NA	NA	NA	1402	4.63425
	I10-I15	I30-I52	D60-D64	NA	NA	1393	7.62466
	N40-N51	A00-A09	NA	NA	NA	1393	4.1863
	I30-I52	A30-A49	NA	NA	NA	1387	2.8274
	D10-D36	E65-E68	NA	NA	NA	1385	4.47671
	K20-K31	E70-E90	J09-J18	NA	NA	1381	7.60274
	K20-K31	E70-E90	D60-D64	NA	NA	1381	7.18082
	E10-E14	D50-D53	NA	NA	NA	1381	5.09863
	D60-D64	J09-J18	NA	NA	NA	1381	2.29589
	M70-M79	E65-E68	NA	NA	NA	1379	4.62192
	K50-K52	M70-M79	NA	NA	NA	1376	4.88767
	I80-I89	M45-M49	NA	NA	NA	1367	5.11781
	N30-N39	M45-M49	NA	NA	NA	1365	4.15068
	F10-F19	N17-N19	NA	NA	NA	1361	2.98904
	M70-M79	J09-J18	NA	NA	NA	1358	4.35342
	D10-D36	D60-D64	NA	NA	NA	1356	4.02192
	C64-C68	N30-N39	NA	NA	NA	1355	0.978082
	I10-I15	N40-N51	N17-N19	NA	NA	1354	8.71096
	E10-E14	I60-I69	NA	NA	NA	1350	5.55342
	E10-E14	K80-K87	NA	NA	NA	1350	4.90411
	K20-K31	E00-E07	NA	NA	NA	1350	4.78082
	I20-I25	H30-H36	NA	NA	NA	1343	5.58082
	D10-D36	K80-K87	NA	NA	NA	1343	4.95616
	I10-I15	D70-D77	NA	NA	NA	1342	3.72055
	D10-D36	C60-C63	NA	NA	NA	1341	4.3589
	I10-I15	K55-K64	A00-A09	NA	NA	1337	7.92329
	E10-E14	K90-K93	NA	NA	NA	1328	4.52192
	I10-I15	G90-G99	NA	NA	NA	1315	4.54247
	I80-I89	A00-A09	NA	NA	NA	1312	4.57397
	I10-I15	N10-N16	NA	NA	NA	1300	3.98904
	M15-M19	A00-A09	NA	NA	NA	1295	4.10411
	I10-I15	N25-N29	NA	NA	NA	1293	4.75616
	J30-J39	M70-M79	NA	NA	NA	1292	5.81644
	I70-I79	N17-N19	NA	NA	NA	1289	3.4
	N30-N39	E65-E68	NA	NA	NA	1286	3.83699
	M20-M25	N17-N19	NA	NA	NA	1285	5.04932
	N30-N39	A00-A09	NA	NA	NA	1283	3.46849
	J40-J47	A00-A09	NA	NA	NA	1280	3.93836
	E10-E14	J20-J22	NA	NA	NA	1274	4.79178
	K50-K52	K90-K93	NA	NA	NA	1274	4.01918
	E10-E14	E70-E90	N17-N19	NA	NA	1265	8.79178
	D10-D36	M45-M49	NA	NA	NA	1264	5.1726
	I80-I89	I70-I79	NA	NA	NA	1262	4.53836
	M70-M79	K90-K93	NA	NA	NA	1261	4.53699
	K40-K46	E70-E90	N17-N19	NA	NA	1260	8.57671
	K20-K31	I30-I52	N17-N19	NA	NA	1260	8.3589
	E10-E14	A00-A09	NA	NA	NA	1259	5.20548
	I80-I89	F30-F39	NA	NA	NA	1259	4.89589
	N40-N51	J20-J22	NA	NA	NA	1257	4.49315
	M05-M14	J09-J18	NA	NA	NA	1250	3.56712
	I10-I15	K55-K64	J20-J22	NA	NA	1249	7.72877
	I20-I25	K55-K64	H25-H28	NA	NA	1248	9.54247
	I10-I15	M15-M19	N17-N19	NA	NA	1237	8.73151
	I10-I15	H53-H54	NA	NA	NA	1237	4.57534
	K55-K64	H90-H95	NA	NA	NA	1229	4.30411
	M70-M79	D60-D64	NA	NA	NA	1228	4.27671
	K55-K64	K65-K67	NA	NA	NA	1224	2.41507
	N40-N51	J90-J94	NA	NA	NA	1222	4.29589
	E10-E14	M45-M49	NA	NA	NA	1220	5.03699
	K50-K52	N17-N19	NA	NA	NA	1220	4.80685
	M15-M19	D50-D53	NA	NA	NA	1219	3.99452
	K40-K46	K70-K77	NA	NA	NA	1216	4.28904
	E70-E90	H90-H95	NA	NA	NA	1210	4.18493
	K40-K46	K55-K64	N17-N19	NA	NA	1207	8.2274
	K55-K64	D70-D77	NA	NA	NA	1198	2.59178
	K50-K52	A00-A09	NA	NA	NA	1197	4.35616
	K40-K46	A30-A49	NA	NA	NA	1196	4.72329
	N30-N39	C76-C80	NA	NA	NA	1194	2.02466
	M15-M19	J20-J22	NA	NA	NA	1190	4.94932
	K55-K64	I26-I28	NA	NA	NA	1189	3.29041
	N40-N51	D50-D53	NA	NA	NA	1188	4.41233
	I20-I25	A30-A49	NA	NA	NA	1184	5.04932
	K50-K52	M05-M14	NA	NA	NA	1183	4.67945
	K40-K46	F40-F48	NA	NA	NA	1180	5.20822
	J40-J47	D50-D53	NA	NA	NA	1180	4.3
	H25-H28	J09-J18	NA	NA	NA	1180	3.97808
	E70-E90	I26-I28	NA	NA	NA	1174	2.73014
	K20-K31	H90-H95	NA	NA	NA	1169	4.87671
	M20-M25	F30-F39	NA	NA	NA	1168	5.08356
	G40-G47	N17-N19	NA	NA	NA	1166	4.41233
	E10-E14	J90-J94	NA	NA	NA	1157	4.27397
	K20-K31	K55-K64	M45-M49	NA	NA	1155	8.74795
	F10-F19	D60-D64	NA	NA	NA	1152	2.95753
	M50-M54	N17-N19	NA	NA	NA	1151	4.09315
	L00-L08	N17-N19	NA	NA	NA	1147	3.63836
	D10-D36	A00-A09	NA	NA	NA	1145	4.63836
	I80-I89	D50-D53	NA	NA	NA	1145	4.28493
	I10-I15	K55-K64	J90-J94	NA	NA	1140	7.07397
	N30-N39	I95-I99	NA	NA	NA	1133	3.16986
	K20-K31	M80-M85	NA	NA	NA	1131	4.91233
	M20-M25	D60-D64	NA	NA	NA	1130	4.2
	N40-N51	C76-C80	NA	NA	NA	1130	3.47534
	I10-I15	I80-I89	N17-N19	NA	NA	1128	8.60137
	I20-I25	C76-C80	NA	NA	NA	1128	5.06164
	K50-K52	F10-F19	NA	NA	NA	1126	4.82329
	N40-N51	I95-I99	NA	NA	NA	1126	3.93836
	M50-M54	B95-B98	NA	NA	NA	1124	4.63699
	I80-I89	C76-C80	NA	NA	NA	1120	3.1274
	D10-D36	I70-I79	NA	NA	NA	1119	4.43014
	K50-K52	M50-M54	NA	NA	NA	1117	4.86849
	N30-N39	A30-A49	NA	NA	NA	1117	2.31233
	M15-M19	J90-J94	NA	NA	NA	1115	4.14795
	I80-I89	J90-J94	NA	NA	NA	1112	4.17808
	N30-N39	J90-J94	NA	NA	NA	1110	3.43151
	I10-I15	K55-K64	I95-I99	NA	NA	1106	7.61644
	E10-E14	I95-I99	NA	NA	NA	1104	5.02466
	C76-C80	D60-D64	NA	NA	NA	1104	0.757534
	I80-I89	J20-J22	NA	NA	NA	1099	4.69863
	I20-I25	F40-F48	NA	NA	NA	1097	4.5726
	J30-J39	K20-K31	K55-K64	NA	NA	1094	9.53151
	I20-I25	H00-H06	NA	NA	NA	1091	5.70137
	I10-I15	K65-K67	NA	NA	NA	1090	3.7863
	I60-I69	N17-N19	NA	NA	NA	1089	3.13151
	L60-L75	M15-M19	NA	NA	NA	1084	6.06849
	I20-I25	K55-K64	J09-J18	NA	NA	1082	8.99863
	K50-K52	B95-B98	NA	NA	NA	1082	3.47534
	K50-K52	D60-D64	NA	NA	NA	1080	3.25068
	E65-E68	N17-N19	NA	NA	NA	1077	2.88767
	G40-G47	H25-H28	NA	NA	NA	1076	4.75342
	M50-M54	J09-J18	NA	NA	NA	1075	4.01918
	C76-C80	J09-J18	NA	NA	NA	1072	0.873973
	I80-I89	I95-I99	NA	NA	NA	1071	3.42192
	G40-G47	J09-J18	NA	NA	NA	1064	4.2863
	M50-M54	E65-E68	NA	NA	NA	1063	4.54795
	C64-C68	E70-E90	NA	NA	NA	1059	3.32603
	E10-E14	K55-K64	N17-N19	NA	NA	1056	8.53288
	K20-K31	D37-D48	NA	NA	NA	1053	3.96712
	I10-I15	K55-K64	J95-J99	NA	NA	1051	7.09863
	E10-E14	I80-I89	E70-E90	NA	NA	1050	8.63288
	K40-K46	E70-E90	J09-J18	NA	NA	1050	8.15753
	E10-E14	I30-I52	N17-N19	NA	NA	1048	9.03699
	N40-N51	J95-J99	NA	NA	NA	1048	4.23425
	J40-J47	I95-I99	NA	NA	NA	1047	4.00822
	J40-J47	C76-C80	NA	NA	NA	1047	2.45205
	D10-D36	C76-C80	NA	NA	NA	1046	3.34247
	H00-H06	M15-M19	NA	NA	NA	1043	4.65753
	K20-K31	I26-I28	NA	NA	NA	1040	3.81096
	I20-I25	K70-K77	NA	NA	NA	1035	5.49315
	E10-E14	J95-J99	NA	NA	NA	1031	4.67671
	M15-M19	I95-I99	NA	NA	NA	1031	4.42466
	I20-I25	C15-C26	NA	NA	NA	1027	4.67397
	M20-M25	K55-K64	M05-M14	NA	NA	1021	8.08219
	M70-M79	A00-A09	NA	NA	NA	1021	4.47123
	K55-K64	N10-N16	NA	NA	NA	1020	3.58219
	I10-I15	N30-N39	H25-H28	NA	NA	1018	8.62603
	K50-K52	J09-J18	NA	NA	NA	1011	4.13699
	I70-I79	J09-J18	NA	NA	NA	1010	3.38493
	D10-D36	J90-J94	NA	NA	NA	1007	4.20548
	N30-N39	D50-D53	NA	NA	NA	1006	3.8589
	K55-K64	G90-G99	NA	NA	NA	1005	3.91233
	I10-I15	K55-K64	C76-C80	NA	NA	1002	5.79452
	I70-I79	D60-D64	NA	NA	NA	1001	3.25205
	K20-K31	D70-D77	NA	NA	NA	999	3.09041
	I10-I15	N30-N39	J09-J18	NA	NA	993	8.06575
	K20-K31	I30-I52	D60-D64	NA	NA	993	7.66027
	E10-E14	K20-K31	N17-N19	NA	NA	991	9.71781
	K40-K46	H90-H95	NA	NA	NA	986	5.06164
	M70-M79	J20-J22	NA	NA	NA	982	4.3726
	E10-E14	K70-K77	NA	NA	NA	980	4.28493
	K40-K46	I30-I52	N17-N19	NA	NA	979	8.51781
	I10-I15	M70-M79	N17-N19	NA	NA	978	8.70822
	C15-C26	K90-K93	NA	NA	NA	976	0.750685
	N30-N39	J95-J99	NA	NA	NA	975	3.29589
	I10-I15	I30-I52	A00-A09	NA	NA	974	8.08356
	E70-E90	N25-N29	NA	NA	NA	974	3.70548
	B95-B98	A00-A09	NA	NA	NA	974	2.39178
	M70-M79	I60-I69	NA	NA	NA	972	4.59726
	M15-M19	J95-J99	NA	NA	NA	969	4.36986
	L00-L08	J09-J18	NA	NA	NA	969	3.67671
	K20-K31	E70-E90	D50-D53	NA	NA	968	7.92877
	K40-K46	M80-M85	NA	NA	NA	961	5.14247
	F10-F19	J95-J99	NA	NA	NA	961	2.67397
	K80-K87	N17-N19	NA	NA	NA	960	2.9863
	I60-I69	J09-J18	NA	NA	NA	958	3.05479
	J30-J39	F10-F19	NA	NA	NA	957	6.23836
	N40-N51	A30-A49	NA	NA	NA	957	3.99178
	K20-K31	E70-E90	J20-J22	NA	NA	956	7.68493
	J40-J47	A30-A49	NA	NA	NA	956	3.19726
	I10-I15	H25-H28	N17-N19	NA	NA	950	8.46438
	C76-C80	N17-N19	NA	NA	NA	949	0.89863
	M50-M54	L80-L99	NA	NA	NA	948	5.15342
	I10-I15	K55-K64	A30-A49	NA	NA	947	6.98904
	E10-E14	A30-A49	NA	NA	NA	947	4.51781
	E10-E14	K20-K31	N30-N39	NA	NA	946	9.06027
	C43-C44	H25-H28	NA	NA	NA	944	3.93425
	J30-J39	M50-M54	NA	NA	NA	939	5.50411
	F10-F19	A00-A09	NA	NA	NA	939	2.91233
	I10-I15	N40-N51	J09-J18	NA	NA	935	8.42466
	D10-D36	J20-J22	NA	NA	NA	935	4.66301
	I10-I15	N30-N39	D60-D64	NA	NA	933	7.31233
	I10-I15	I30-I52	D50-D53	NA	NA	930	7.66027
	G50-G59	H25-H28	NA	NA	NA	930	4.7411
	I80-I89	A30-A49	NA	NA	NA	926	3.41233
	K20-K31	E70-E90	J90-J94	NA	NA	924	6.99452
	N40-N51	F40-F48	NA	NA	NA	924	4.52603
	K50-K52	K80-K87	NA	NA	NA	920	4.25342
	M50-M54	D60-D64	NA	NA	NA	919	3.78082
	D60-D64	A00-A09	NA	NA	NA	919	2.10411
	E10-E14	E70-E90	B95-B98	NA	NA	918	8.29178
	D60-D64	A30-A49	NA	NA	NA	918	1.3726
	L00-L08	H25-H28	NA	NA	NA	915	4.86027
	L00-L08	E65-E68	NA	NA	NA	913	4.89041
	K80-K87	J09-J18	NA	NA	NA	913	3.23288
	I10-I15	E70-E90	A30-A49	NA	NA	912	7.03151
	M05-M14	A00-A09	NA	NA	NA	911	3.13151
	J30-J39	M05-M14	NA	NA	NA	907	5.96164
	I10-I15	N40-N51	E65-E68	NA	NA	906	8.04521
	K20-K31	K65-K67	NA	NA	NA	906	4.33425
	F10-F19	I95-I99	NA	NA	NA	896	2.74247
	C60-C63	C76-C80	NA	NA	NA	890	1.99726
	J40-J47	F40-F48	NA	NA	NA	888	4.26301
	J30-J39	K40-K46	K55-K64	NA	NA	886	9.46027
	K20-K31	N40-N51	H25-H28	NA	NA	885	9.31781
	E10-E14	C76-C80	NA	NA	NA	885	2.87123
	I10-I15	I80-I89	D60-D64	NA	NA	884	8.13288
	K40-K46	K65-K67	NA	NA	NA	884	3.89726
	G50-G59	E65-E68	NA	NA	NA	883	4.68219
	I80-I89	J95-J99	NA	NA	NA	883	3.85479
	I20-I25	K55-K64	E65-E68	NA	NA	882	8.65479
	K20-K31	E70-E90	I95-I99	NA	NA	881	7.34795
	F10-F19	J90-J94	NA	NA	NA	880	2.77397
	I20-I25	I26-I28	NA	NA	NA	878	4.66712
	M15-M19	F40-F48	NA	NA	NA	878	4.32055
	K20-K31	M15-M19	H25-H28	NA	NA	877	9.38356
	I80-I89	E70-E90	N17-N19	NA	NA	876	8.0137
	E10-E14	C15-C26	NA	NA	NA	875	3.75616
	F30-F39	J09-J18	NA	NA	NA	873	3.11781
	J30-J39	K20-K31	E70-E90	NA	NA	869	9.40822
	I20-I25	H90-H95	NA	NA	NA	869	5.69589
	I10-I15	K20-K31	E70-E90	N17-N19	NA	865	10.5507
	M20-M25	J20-J22	NA	NA	NA	864	4.72329
	D10-D36	J95-J99	NA	NA	NA	860	4.20411
	M70-M79	J90-J94	NA	NA	NA	860	4.13562
	K55-K64	H53-H54	NA	NA	NA	859	4.18356
	K20-K31	G90-G99	NA	NA	NA	857	4.63288
	C81-C96	D70-D77	NA	NA	NA	853	0.539726
	M15-M19	C76-C80	NA	NA	NA	852	4.02603
	M05-M14	D50-D53	NA	NA	NA	849	3.52603
	M45-M49	N17-N19	NA	NA	NA	846	3.71507
	M50-M54	K80-K87	NA	NA	NA	844	4.90274
	K20-K31	N40-N51	N17-N19	NA	NA	841	8.78904
	I10-I15	I70-I79	N17-N19	NA	NA	838	8.16712
	N40-N51	H90-H95	NA	NA	NA	836	4.6411
	G40-G47	K90-K93	NA	NA	NA	836	4.61781
	M70-M79	D50-D53	NA	NA	NA	835	4.09315
	C15-C26	N30-N39	NA	NA	NA	833	2.43836
	C15-C26	D60-D64	NA	NA	NA	833	0.906849
	I20-I25	K55-K64	A00-A09	NA	NA	832	8.43836
	M50-M54	A00-A09	NA	NA	NA	831	3.90411
	I20-I25	M15-M19	N17-N19	NA	NA	829	9.21644
	I20-I25	K55-K64	J20-J22	NA	NA	827	8.8411
	I10-I15	D60-D64	J09-J18	NA	NA	826	7.48493
	K50-K52	L80-L99	NA	NA	NA	824	4.61781
	K50-K52	F30-F39	NA	NA	NA	823	4.57534
	E70-E90	K65-K67	NA	NA	NA	823	2.74247
	K20-K31	E70-E90	J95-J99	NA	NA	820	7.31233
	K20-K31	H53-H54	NA	NA	NA	819	5.48219
	D10-D36	I95-I99	NA	NA	NA	817	4.16438
	M50-M54	J20-J22	NA	NA	NA	817	4.01918
	J40-J47	K70-K77	NA	NA	NA	816	3.8863
	I80-I89	F40-F48	NA	NA	NA	815	5.01918
	M05-M14	J90-J94	NA	NA	NA	812	3.14932
	D37-D48	N30-N39	NA	NA	NA	812	2.23836
	C76-C80	A30-A49	NA	NA	NA	812	0.582192
	K20-K31	N10-N16	NA	NA	NA	811	4.44932
	H25-H28	J90-J94	NA	NA	NA	809	4.09315
	I20-I25	K55-K64	I60-I69	NA	NA	808	8.34384
	I10-I15	G40-G47	N17-N19	NA	NA	807	8.85479
	M70-M79	I95-I99	NA	NA	NA	805	4.18082
	K20-K31	N25-N29	NA	NA	NA	803	3.91233
	K20-K31	M15-M19	N17-N19	NA	NA	798	8.85205
	G50-G59	B95-B98	NA	NA	NA	797	4.3863
	I20-I25	M15-M19	H25-H28	NA	NA	795	9.42466
	I10-I15	I80-I89	E65-E68	NA	NA	793	8.92603
	K40-K46	D70-D77	NA	NA	NA	789	4.69589
	I10-I15	L00-L08	N17-N19	NA	NA	784	8.5411
	I10-I15	F10-F19	N17-N19	NA	NA	784	7.58493
	H25-H28	D50-D53	NA	NA	NA	781	3.89863
	K20-K31	C81-C96	NA	NA	NA	780	4.44521
	G50-G59	N17-N19	NA	NA	NA	777	4.21644
	F10-F19	C76-C80	NA	NA	NA	775	2.01096
	I10-I15	J20-J22	J09-J18	NA	NA	773	7.18082
	I20-I25	K55-K64	J90-J94	NA	NA	768	8.40548
	K40-K46	M15-M19	H25-H28	NA	NA	764	9.17397
	I10-I15	I30-I52	A30-A49	NA	NA	764	7.56849
	I10-I15	M50-M54	N17-N19	NA	NA	763	8.67397
	M45-M49	J09-J18	NA	NA	NA	762	3.44384
	M05-M14	I95-I99	NA	NA	NA	761	3.09315
	I20-I25	K55-K64	I95-I99	NA	NA	760	8.41918
	K40-K46	E70-E90	J90-J94	NA	NA	760	7.43699
	M70-M79	J95-J99	NA	NA	NA	760	4.07671
	I10-I15	N30-N39	E65-E68	NA	NA	759	7.74795
	G40-G47	D60-D64	NA	NA	NA	759	4.25753
	N40-N51	K70-K77	NA	NA	NA	759	3.95616
	I10-I15	K20-K31	I30-I52	N17-N19	NA	758	10.9411
	K50-K52	M45-M49	NA	NA	NA	756	5.04795
	M50-M54	I60-I69	NA	NA	NA	754	4.24247
	C15-C26	N17-N19	NA	NA	NA	754	1.29178
	C15-C26	J09-J18	NA	NA	NA	753	0.99726
	I10-I15	N30-N39	A00-A09	NA	NA	749	8.46301
	J40-J47	M80-M85	NA	NA	NA	749	4.66849
	M05-M14	J95-J99	NA	NA	NA	745	3.26301
	K50-K52	J20-J22	NA	NA	NA	743	3.79452
	I10-I15	E65-E68	N17-N19	NA	NA	739	7.71781
	I10-I15	K50-K52	N17-N19	NA	NA	737	8.17808
	K20-K31	I30-I52	J90-J94	NA	NA	737	7.8411
	I10-I15	M70-M79	E65-E68	NA	NA	735	8.38904
	K20-K31	N30-N39	J09-J18	NA	NA	732	8.29589
	K00-K14	J09-J18	NA	NA	NA	732	3.61781
	E65-E68	J09-J18	NA	NA	NA	730	3.23699
	K80-K87	A00-A09	NA	NA	NA	730	3.00548
	K20-K31	I30-I52	I95-I99	NA	NA	728	7.55068
	I20-I25	C64-C68	NA	NA	NA	728	4.7274
	F10-F19	D50-D53	NA	NA	NA	728	3.09315
	J30-J39	B95-B98	NA	NA	NA	727	5.52603
	H30-H36	N17-N19	NA	NA	NA	727	4.10959
	H25-H28	A00-A09	NA	NA	NA	727	3.63288
	H25-H28	J95-J99	NA	NA	NA	727	3.61644
	I20-I25	M80-M85	NA	NA	NA	726	5.28904
	N30-N39	F40-F48	NA	NA	NA	726	3.82192
	J40-J47	I26-I28	NA	NA	NA	725	3.23836
	K20-K31	I30-I52	J20-J22	NA	NA	722	8.1726
	D10-D36	A30-A49	NA	NA	NA	721	4.49041
	K20-K31	N40-N51	M45-M49	NA	NA	720	9.49315
	C81-C96	I30-I52	NA	NA	NA	720	3.37534
	D10-D36	K70-K77	NA	NA	NA	717	4.27397
	I80-I89	I30-I52	N17-N19	NA	NA	716	8.29452
	I10-I15	I60-I69	N17-N19	NA	NA	714	8.32877
	L60-L75	M70-M79	NA	NA	NA	714	5.65342
	M70-M79	C76-C80	NA	NA	NA	714	3.59178
	G50-G59	J09-J18	NA	NA	NA	713	4.64932
	C15-C26	B95-B98	NA	NA	NA	712	1.17123
	E70-E90	J20-J22	J09-J18	NA	NA	709	5.96164
	C60-C63	N17-N19	NA	NA	NA	707	2.83836
	K20-K31	C15-C26	E70-E90	NA	NA	705	6.26301
	E70-E90	D60-D64	J09-J18	NA	NA	705	5.6
	M20-M25	I95-I99	NA	NA	NA	705	4.89041
	G50-G59	F30-F39	NA	NA	NA	703	5.03014
	J30-J39	L80-L99	NA	NA	NA	703	4.87123
	C81-C96	A30-A49	NA	NA	NA	702	0.753425
	I20-I25	H53-H54	NA	NA	NA	699	5.37808
	K50-K52	D50-D53	NA	NA	NA	699	4.49589
	M70-M79	F40-F48	NA	NA	NA	699	4.09863
	F10-F19	A30-A49	NA	NA	NA	699	2.72603
	M70-M79	A30-A49	NA	NA	NA	698	3.83014
	K00-K14	N17-N19	NA	NA	NA	697	4.37808
	N40-N51	H40-H42	NA	NA	NA	694	5.53014
	G40-G47	A00-A09	NA	NA	NA	693	4.26849
	K40-K46	E70-E90	I95-I99	NA	NA	692	8.08356
	I20-I25	H40-H42	NA	NA	NA	687	5.00274
	C15-C26	K50-K52	NA	NA	NA	687	1.46027
	I80-I89	E70-E90	J09-J18	NA	NA	686	7.46712
	K50-K52	I70-I79	NA	NA	NA	684	4.30822
	C76-C80	D70-D77	NA	NA	NA	684	0.39863
	J40-J47	H90-H95	NA	NA	NA	683	4.30685
	N40-N51	I26-I28	NA	NA	NA	683	4.21644
	H25-H28	I95-I99	NA	NA	NA	683	4.04658
	I10-I15	H25-H28	J09-J18	NA	NA	682	8.18356
	I10-I15	M05-M14	J09-J18	NA	NA	681	7.89863
	M20-M25	F40-F48	NA	NA	NA	681	5.2274
	K40-K46	E70-E90	J20-J22	NA	NA	680	8.4726
	L80-L99	A00-A09	NA	NA	NA	677	3.30411
	J30-J39	G50-G59	NA	NA	NA	676	6.87671
	K20-K31	N30-N39	H25-H28	NA	NA	675	9.3863
	I20-I25	G90-G99	NA	NA	NA	675	5.32603
	C76-C80	J20-J22	NA	NA	NA	673	1.19726
	J30-J39	K40-K46	E70-E90	NA	NA	672	9.34795
	I20-I25	I70-I79	N17-N19	NA	NA	671	8.87945
	M15-M19	I26-I28	NA	NA	NA	671	4.10685
	J30-J39	J09-J18	NA	NA	NA	670	5.24247
	E10-E14	I30-I52	D60-D64	NA	NA	667	8.70685
	K55-K64	J20-J22	J09-J18	NA	NA	666	6.14932
	I70-I79	I95-I99	NA	NA	NA	663	3.42466
	K40-K46	M15-M19	N17-N19	NA	NA	660	9.19726
	K50-K52	E65-E68	NA	NA	NA	660	4.96301
	K40-K46	N25-N29	NA	NA	NA	660	4.69726
	E10-E14	F40-F48	NA	NA	NA	658	4.9137
	K40-K46	K55-K64	C76-C80	NA	NA	656	6.5589
	M50-M54	F40-F48	NA	NA	NA	654	4.39589
	C60-C63	D60-D64	NA	NA	NA	653	3.02192
	D10-D36	H90-H95	NA	NA	NA	651	4.6411
	K50-K52	J90-J94	NA	NA	NA	651	3.89863
	I20-I25	H25-H28	N17-N19	NA	NA	650	9.49178
	K50-K52	I95-I99	NA	NA	NA	649	3.99726
	J30-J39	K20-K31	M15-M19	NA	NA	646	9.31507
	N40-N51	G90-G99	NA	NA	NA	646	4.50822
	K20-K31	M70-M79	N17-N19	NA	NA	645	8.95342
	K40-K46	E70-E90	J95-J99	NA	NA	645	7.5863
	L00-L08	A00-A09	NA	NA	NA	644	3.06438
	I80-I89	D70-D77	NA	NA	NA	643	3.05205
	K20-K31	N30-N39	D60-D64	NA	NA	642	8.33288
	C15-C26	J90-J94	NA	NA	NA	642	0.858904
	I20-I25	N25-N29	NA	NA	NA	641	4.88219
	I20-I25	K55-K64	J95-J99	NA	NA	640	8.1
	K40-K46	K55-K64	I60-I69	NA	NA	639	8.43836
	I10-I15	N30-N39	A30-A49	NA	NA	639	7.27397
	K00-K14	F30-F39	NA	NA	NA	638	5.18219
	I20-I25	D70-D77	NA	NA	NA	638	4.72877
	K40-K46	C81-C96	NA	NA	NA	637	4.72055
	I70-I79	D50-D53	NA	NA	NA	637	3.22466
	G40-G47	J95-J99	NA	NA	NA	635	3.76712
	G40-G47	I95-I99	NA	NA	NA	634	3.83836
	C43-C44	N17-N19	NA	NA	NA	633	3.9589
	M50-M54	D50-D53	NA	NA	NA	633	3.8411
	K50-K52	I60-I69	NA	NA	NA	630	4.76027
	C81-C96	J09-J18	NA	NA	NA	630	1.84795
	I80-I89	H90-H95	NA	NA	NA	629	5.28767
	G50-G59	K90-K93	NA	NA	NA	629	4.41918
	I20-I25	N30-N39	H25-H28	NA	NA	627	9.64384
	I80-I89	M80-M85	NA	NA	NA	626	5.11644
	M50-M54	J95-J99	NA	NA	NA	625	4.24932
	K00-K14	D60-D64	NA	NA	NA	624	3.63288
	G50-G59	D60-D64	NA	NA	NA	623	3.85753
	K20-K31	F10-F19	J09-J18	NA	NA	622	7.97808
	I10-I15	I70-I79	D60-D64	NA	NA	622	7.49726
	I10-I15	N30-N39	D50-D53	NA	NA	621	7.64384
	I10-I15	I70-I79	J09-J18	NA	NA	619	8.14247
	F30-F39	A00-A09	NA	NA	NA	619	3.0274
	N30-N39	H90-H95	NA	NA	NA	618	4.18904
	I20-I25	N10-N16	NA	NA	NA	617	5.23836
	M50-M54	I95-I99	NA	NA	NA	617	4.10411
	I10-I15	C15-C26	C76-C80	NA	NA	617	4.04932
	D10-D36	E70-E90	J09-J18	NA	NA	616	7.55342
	L60-L75	F10-F19	NA	NA	NA	616	7.25753
	I20-I25	M15-M19	J09-J18	NA	NA	615	9.20274
	K00-K14	K90-K93	NA	NA	NA	614	4.16164
	M05-M14	A30-A49	NA	NA	NA	613	3.21918
	K50-K52	A30-A49	NA	NA	NA	612	3.82603
	J30-J39	M45-M49	NA	NA	NA	611	5.94521
	I70-I79	J95-J99	NA	NA	NA	611	3.16438
	K20-K31	H25-H28	N17-N19	NA	NA	610	8.3
	M20-M25	A30-A49	NA	NA	NA	610	4.52603
	G40-G47	J90-J94	NA	NA	NA	610	4.17397
	I70-I79	A00-A09	NA	NA	NA	610	3.06986
	I20-I25	M70-M79	N17-N19	NA	NA	609	9.08767
	C15-C26	A30-A49	NA	NA	NA	609	0.835616
	M15-M19	G90-G99	NA	NA	NA	607	4.30685
	K80-K87	C76-C80	NA	NA	NA	607	1.55068
	K40-K46	I30-I52	J90-J94	NA	NA	606	7.65342
	C60-C63	B95-B98	NA	NA	NA	604	3.68767
	M50-M54	J90-J94	NA	NA	NA	601	3.9726
	K40-K46	N30-N39	H25-H28	NA	NA	600	9.34795
	M20-M25	K70-K77	NA	NA	NA	600	5.00274
	L00-L08	J90-J94	NA	NA	NA	600	3.3137
	K80-K87	A30-A49	NA	NA	NA	600	1.83288
	M45-M49	A00-A09	NA	NA	NA	599	3.32329
	E10-E14	N40-N51	N17-N19	NA	NA	598	8.74247
	N30-N39	I26-I28	NA	NA	NA	598	3.29726
	J30-J39	E65-E68	NA	NA	NA	597	6.39452
	G40-G47	D50-D53	NA	NA	NA	596	4.3
	C76-C80	A00-A09	NA	NA	NA	596	0.830137
	N20-N23	M05-M14	NA	NA	NA	594	5.49315
	K40-K46	I30-I52	I95-I99	NA	NA	592	8.41507
	E10-E14	K20-K31	I70-I79	NA	NA	589	9.19452
	I10-I15	M45-M49	N17-N19	NA	NA	588	8.04247
	I10-I15	B95-B98	A00-A09	NA	NA	585	8.09315
	K80-K87	K65-K67	NA	NA	NA	584	0.578082
	K20-K31	D60-D64	J09-J18	NA	NA	579	7.0274
	M70-M79	H90-H95	NA	NA	NA	579	4.54247
	I10-I15	K20-K31	I30-I52	D60-D64	NA	578	10.3822
	L00-L08	I95-I99	NA	NA	NA	578	3.67945
	M70-M79	I26-I28	NA	NA	NA	578	3.56712
	K50-K52	J95-J99	NA	NA	NA	575	3.9863
	K40-K46	N30-N39	J09-J18	NA	NA	573	8.47123
	K20-K31	N40-N51	C60-C63	NA	NA	573	7.97808
	J40-J47	D70-D77	NA	NA	NA	573	2.92877
	K50-K52	K70-K77	NA	NA	NA	572	4.16164
	E10-E14	H90-H95	NA	NA	NA	569	5.16712
	K90-K93	A30-A49	NA	NA	NA	569	2.26301
	I10-I15	M70-M79	J20-J22	NA	NA	565	8.34247
	K20-K31	J20-J22	J09-J18	NA	NA	565	8.07671
	I30-I52	J20-J22	J09-J18	NA	NA	565	6.01918
	L60-L75	M05-M14	NA	NA	NA	564	6.41918
	J30-J39	F30-F39	NA	NA	NA	564	6.02329
	C15-C26	A00-A09	NA	NA	NA	564	1.07397
	I10-I15	M50-M54	D60-D64	NA	NA	562	8.23425
	K00-K14	M45-M49	NA	NA	NA	561	4.83562
	I10-I15	D60-D64	A00-A09	NA	NA	560	7.61781
	M20-M25	H90-H95	NA	NA	NA	560	5.25342
	N20-N23	N17-N19	NA	NA	NA	560	4.7411
	I10-I15	L00-L08	J09-J18	NA	NA	559	8.00274
	K20-K31	F10-F19	N17-N19	NA	NA	557	8.01096
	I10-I15	I60-I69	J09-J18	NA	NA	557	7.9863
	K00-K14	J20-J22	NA	NA	NA	557	3.83014
	K80-K87	J95-J99	NA	NA	NA	557	2.34247
	E10-E14	H25-H28	N17-N19	NA	NA	556	9.51918
	I20-I25	N30-N39	D60-D64	NA	NA	556	8.04932
	I80-I89	E70-E90	I95-I99	NA	NA	556	7.38904
	I80-I89	G90-G99	NA	NA	NA	554	4.7
	I30-I52	D60-D64	J09-J18	NA	NA	552	6.41096
	G50-G59	K80-K87	NA	NA	NA	552	4.72055
	M05-M14	C76-C80	NA	NA	NA	551	2.13151
	E10-E14	I26-I28	NA	NA	NA	550	4.34521
	K40-K46	E70-E90	A30-A49	NA	NA	549	7.68219
	I10-I15	N30-N39	C76-C80	NA	NA	549	6.23562
	C60-C63	J09-J18	NA	NA	NA	549	3.29589
	D10-D36	C64-C68	NA	NA	NA	548	4.26027
	J30-J39	K40-K46	M15-M19	NA	NA	547	9.60274
	K40-K46	I30-I52	J20-J22	NA	NA	546	8.25342
	K20-K31	I70-I79	N17-N19	NA	NA	546	8.20411
	E10-E14	G90-G99	NA	NA	NA	546	5.19589
	C43-C44	C76-C80	NA	NA	NA	545	2.64658
	E65-E68	A00-A09	NA	NA	NA	540	2.97534
	H30-H36	D60-D64	NA	NA	NA	539	3.99178
	J30-J39	J20-J22	NA	NA	NA	538	4.96164
	N40-N51	H53-H54	NA	NA	NA	537	4.95342
	C81-C96	N17-N19	NA	NA	NA	536	2.2411
	I10-I15	G50-G59	N17-N19	NA	NA	535	8.70685
	M70-M79	G90-G99	NA	NA	NA	535	4.14521
	L00-L08	J95-J99	NA	NA	NA	535	3.54521
	I20-I25	G40-G47	N17-N19	NA	NA	534	9.37397
	C64-C68	N17-N19	NA	NA	NA	533	2.33973
	L00-L08	D50-D53	NA	NA	NA	532	4.22055
	I10-I15	H30-H36	N17-N19	NA	NA	531	8.36712
	J40-J47	G90-G99	NA	NA	NA	529	4.61096
	K40-K46	N30-N39	D60-D64	NA	NA	527	7.88767
	I10-I15	D60-D64	A30-A49	NA	NA	527	6.51233
	F30-F39	D50-D53	NA	NA	NA	527	3.12877
	D10-D36	K65-K67	NA	NA	NA	525	3.40822
	M50-M54	A30-A49	NA	NA	NA	525	3.15342
	C64-C68	C76-C80	NA	NA	NA	525	1.45479
	E10-E14	K55-K64	I60-I69	NA	NA	524	8.50822
	K00-K14	E65-E68	NA	NA	NA	524	4.9726
	I10-I15	L00-L08	E65-E68	NA	NA	523	8.49863
	F30-F39	I95-I99	NA	NA	NA	523	3.50411
	C15-C26	K65-K67	NA	NA	NA	523	0.90137
	L60-L75	M50-M54	NA	NA	NA	522	5.63288
	I20-I25	K65-K67	NA	NA	NA	521	5.01096
	I20-I25	M50-M54	N17-N19	NA	NA	518	9.49315
	H25-H28	A30-A49	NA	NA	NA	518	3.59589
	H25-H28	C76-C80	NA	NA	NA	517	3.51507
	I20-I25	D60-D64	J09-J18	NA	NA	516	8.62192
	G50-G59	J20-J22	NA	NA	NA	513	4.52055
	I20-I25	M70-M79	H25-H28	NA	NA	512	9.59452
	D37-D48	N17-N19	NA	NA	NA	512	2.65753
	N40-N51	K65-K67	NA	NA	NA	511	3.1863
	I60-I69	A00-A09	NA	NA	NA	511	2.65205
	J30-J39	K20-K31	I30-I52	NA	NA	510	10.174
	D37-D48	C64-C68	NA	NA	NA	510	0.20411
	I20-I25	E65-E68	N17-N19	NA	NA	509	8.2274
	I10-I15	C76-C80	D60-D64	NA	NA	509	4.29863
	I70-I79	A30-A49	NA	NA	NA	508	2.82603
	K70-K77	I95-I99	NA	NA	NA	508	1.99452
	K20-K31	M50-M54	N17-N19	NA	NA	507	9.40822
	M15-M19	N25-N29	NA	NA	NA	507	4.33973
	K00-K14	A00-A09	NA	NA	NA	505	3.43288
	F30-F39	J95-J99	NA	NA	NA	505	2.89863
	G40-G47	K70-K77	NA	NA	NA	504	3.96438
	N20-N23	B95-B98	NA	NA	NA	503	4.3589
	I10-I15	M70-M79	I95-I99	NA	NA	502	8.12603
	I10-I15	M05-M14	A00-A09	NA	NA	502	7.84795
	I20-I25	K55-K64	C76-C80	NA	NA	502	7.71233
	K55-K64	E65-E68	N17-N19	NA	NA	501	6.2274
	K80-K87	I95-I99	NA	NA	NA	501	2.83288
	K20-K31	I30-I52	A30-A49	NA	NA	499	7.87671
	I10-I15	M05-M14	D50-D53	NA	NA	498	7.74247
	K20-K31	C15-C26	C76-C80	NA	NA	498	3.26712
	G50-G59	A00-A09	NA	NA	NA	497	4.72603
	M45-M49	D50-D53	NA	NA	NA	496	3.14658
	E10-E14	H53-H54	NA	NA	NA	492	5.39726
	I20-I25	N40-N51	I60-I69	NA	NA	491	9.11781
	I10-I15	G50-G59	H25-H28	NA	NA	491	8.5589
	I10-I15	C76-C80	J09-J18	NA	NA	488	4.87397
	I80-I89	K65-K67	NA	NA	NA	487	3.45205
	I20-I25	I70-I79	J09-J18	NA	NA	483	9.80274
	K20-K31	H25-H28	J09-J18	NA	NA	483	8.53151
	I10-I15	I80-I89	E70-E90	N17-N19	NA	482	10.5137
	K20-K31	K55-K64	K65-K67	NA	NA	482	7.69726
	I20-I25	M70-M79	J09-J18	NA	NA	481	9.32055
	I10-I15	C76-C80	N17-N19	NA	NA	481	5.27123
	H30-H36	J09-J18	NA	NA	NA	481	3.81918
	C76-C80	I95-I99	NA	NA	NA	481	1.05205
	I20-I25	I70-I79	D60-D64	NA	NA	480	7.96849
	D37-D48	D70-D77	NA	NA	NA	480	1.47808
	G40-G47	A30-A49	NA	NA	NA	477	4.3726
	E10-E14	I30-I52	D50-D53	NA	NA	476	8.99726
	K20-K31	E70-E90	H90-H95	NA	NA	475	8.64384
	E10-E14	E65-E68	N17-N19	NA	NA	475	8.43014
	K20-K31	N30-N39	I95-I99	NA	NA	475	8.00548
	E10-E14	D70-D77	NA	NA	NA	475	3.54247
	I80-I89	M15-M19	H25-H28	NA	NA	474	9.23288
	I10-I15	H25-H28	D50-D53	NA	NA	473	8.18904
	K20-K31	K80-K87	N17-N19	NA	NA	473	7.79178
	E10-E14	N10-N16	NA	NA	NA	473	3.79726
	I10-I15	H25-H28	J90-J94	NA	NA	471	7.67945
	E10-E14	K20-K31	I60-I69	NA	NA	470	9.01233
	I20-I25	N40-N51	J20-J22	NA	NA	469	8.60822
	K55-K64	I60-I69	N17-N19	NA	NA	469	6.76986
	D70-D77	J20-J22	NA	NA	NA	469	1.33973
	E10-E14	M70-M79	N17-N19	NA	NA	468	9.5589
	I20-I25	N30-N39	E65-E68	NA	NA	467	8.94521
	F30-F39	A30-A49	NA	NA	NA	467	2.45753
	K50-K52	I30-I52	N17-N19	NA	NA	466	8.09178
	I80-I89	N25-N29	NA	NA	NA	466	4.92877
	K40-K46	K55-K64	K65-K67	NA	NA	465	6.90685
	K50-K52	M80-M85	NA	NA	NA	465	4.88767
	I10-I15	E65-E68	J09-J18	NA	NA	464	7.88767
	I20-I25	M70-M79	D60-D64	NA	NA	463	8.43288
	I10-I15	M05-M14	I95-I99	NA	NA	463	7.64658
	K20-K31	K80-K87	J09-J18	NA	NA	462	7.8
	G50-G59	D50-D53	NA	NA	NA	462	4.23973
	D37-D48	C15-C26	NA	NA	NA	462	0.223288
	N30-N39	K65-K67	NA	NA	NA	461	2.72329
	E10-E14	N25-N29	NA	NA	NA	460	5.16849
	K40-K46	J20-J22	J09-J18	NA	NA	458	8.15616
	I10-I15	F30-F39	J09-J18	NA	NA	458	7.68904
	D37-D48	J09-J18	NA	NA	NA	458	2.90137
	I80-I89	M15-M19	N17-N19	NA	NA	457	8.10685
	M45-M49	J95-J99	NA	NA	NA	457	3.13151
	I20-I25	H25-H28	J09-J18	NA	NA	455	9.50959
	C76-C80	I26-I28	NA	NA	NA	455	0.534247
	D10-D36	N25-N29	NA	NA	NA	454	4.36027
	C81-C96	J20-J22	NA	NA	NA	454	2.02055
	E10-E14	I30-I52	A00-A09	NA	NA	453	8.6274
	I20-I25	N30-N39	A00-A09	NA	NA	452	9.0137
	J40-J47	D60-D64	J09-J18	NA	NA	452	6.5863
	C15-C26	J20-J22	NA	NA	NA	452	1.60137
	K50-K52	F40-F48	NA	NA	NA	450	5.86164
	K00-K14	J90-J94	NA	NA	NA	449	4.03288
	C15-C26	I95-I99	NA	NA	NA	449	1.26849
	D37-D48	C76-C80	NA	NA	NA	449	0.975342
	I20-I25	M15-M19	J20-J22	NA	NA	448	8.81781
	K55-K64	C76-C80	D60-D64	NA	NA	448	3.6726
	M45-M49	I95-I99	NA	NA	NA	448	2.93699
	I60-I69	A30-A49	NA	NA	NA	447	2.63288
	C15-C26	D70-D77	NA	NA	NA	445	0.60274
	E10-E14	L00-L08	N17-N19	NA	NA	444	9.38356
	K20-K31	I70-I79	J09-J18	NA	NA	444	8.11096
	C15-C26	J95-J99	NA	NA	NA	444	0.919178
	C81-C96	B95-B98	NA	NA	NA	443	1.66849
	K40-K46	F10-F19	J09-J18	NA	NA	442	7.73562
	I10-I15	M45-M49	J09-J18	NA	NA	442	7.22329
	D10-D36	G90-G99	NA	NA	NA	442	4.5274
	C15-C26	L80-L99	NA	NA	NA	442	3.62055
	I20-I25	G40-G47	J09-J18	NA	NA	441	8.7589
	J40-J47	N25-N29	NA	NA	NA	440	4.35753
	E10-E14	H30-H36	I30-I52	NA	NA	439	9.45753
	I10-I15	I70-I79	I95-I99	NA	NA	439	7.98082
	K20-K31	E70-E90	I26-I28	NA	NA	439	7.26849
	N20-N23	E65-E68	NA	NA	NA	439	6.02466
	G50-G59	J90-J94	NA	NA	NA	437	4.76712
	F10-F19	I26-I28	NA	NA	NA	437	2.90685
	J30-J39	D10-D36	E70-E90	NA	NA	436	8.62192
	K40-K46	H25-H28	N17-N19	NA	NA	436	8.42329
	K00-K14	J95-J99	NA	NA	NA	436	3.76301
	J30-J39	J95-J99	NA	NA	NA	434	4.9411
	K20-K31	I60-I69	N17-N19	NA	NA	433	7.87123
	C60-C63	A00-A09	NA	NA	NA	430	3.03425
	I10-I15	H25-H28	I95-I99	NA	NA	429	8.65753
	I80-I89	I30-I52	I95-I99	NA	NA	429	7.02466
	I20-I25	M15-M19	I95-I99	NA	NA	428	8.44521
	E10-E14	N30-N39	D60-D64	NA	NA	428	8.12877
	N20-N23	J09-J18	NA	NA	NA	426	5.03562
	K20-K31	N30-N39	A30-A49	NA	NA	425	8.13699
	J40-J47	K65-K67	NA	NA	NA	425	3.78904
	I10-I15	M70-M79	A30-A49	NA	NA	424	8.24932
	K55-K64	I60-I69	J09-J18	NA	NA	424	6.77534
	I70-I79	C76-C80	NA	NA	NA	424	3.24247
	I10-I15	I70-I79	D50-D53	NA	NA	423	7.52877
	K20-K31	E65-E68	N17-N19	NA	NA	420	7.66849
	K20-K31	L00-L08	J09-J18	NA	NA	420	7.46575
	D10-D36	E70-E90	I95-I99	NA	NA	420	6.89178
	K40-K46	I70-I79	N17-N19	NA	NA	419	8.38082
	I10-I15	H25-H28	J95-J99	NA	NA	418	8.1274
	K20-K31	F30-F39	J09-J18	NA	NA	417	7.65753
	K40-K46	F10-F19	N17-N19	NA	NA	416	7.86575
	K40-K46	D60-D64	J09-J18	NA	NA	416	7.58356
	I10-I15	H25-H28	A00-A09	NA	NA	415	8.72603
	D50-D53	A30-A49	NA	NA	NA	414	1.83973
	C81-C96	A00-A09	NA	NA	NA	414	1.47534
	I10-I15	M05-M14	J95-J99	NA	NA	413	7.76712
	I10-I15	L80-L99	A00-A09	NA	NA	412	8.86301
	I10-I15	C43-C44	N17-N19	NA	NA	412	8.19863
	F10-F19	D70-D77	NA	NA	NA	412	1.86438
	K20-K31	M70-M79	J20-J22	NA	NA	411	8.05479
	I10-I15	C15-C26	N17-N19	NA	NA	411	5.7589
	G50-G59	I95-I99	NA	NA	NA	410	4.5726
	K50-K52	K65-K67	NA	NA	NA	410	3.9726
	E10-E14	K55-K64	A30-A49	NA	NA	409	7.61644
	D10-D36	E70-E90	J20-J22	NA	NA	409	7.53973
	I80-I89	I30-I52	J90-J94	NA	NA	409	7.20274
	K20-K31	F10-F19	I95-I99	NA	NA	409	6.75616
	K00-K14	F40-F48	NA	NA	NA	406	4.66849
	I20-I25	M15-M19	J90-J94	NA	NA	404	8.66575
	N30-N39	D60-D64	J09-J18	NA	NA	404	5.88356
	I20-I25	M50-M54	J09-J18	NA	NA	402	9.54795
	E10-E14	K65-K67	NA	NA	NA	402	3.77123
	K00-K14	I95-I99	NA	NA	NA	402	3.36712
	K40-K46	I30-I52	A30-A49	NA	NA	401	8.02466
	G50-G59	J95-J99	NA	NA	NA	401	4.95616
	M45-M49	A30-A49	NA	NA	NA	401	2.60822
	K55-K64	F30-F39	J09-J18	NA	NA	400	6.82466
	D50-D53	C76-C80	NA	NA	NA	399	1.1863
	N20-N23	K90-K93	NA	NA	NA	396	5.10959
	C60-C63	A30-A49	NA	NA	NA	396	2.53288
	K55-K64	C76-C80	J09-J18	NA	NA	395	4.32877
	I20-I25	N30-N39	D50-D53	NA	NA	394	8.8726
	K20-K31	E70-E90	N25-N29	NA	NA	393	7.51507
	J30-J39	M65-M68	NA	NA	NA	393	5.58904
	L60-L75	K00-K14	NA	NA	NA	392	6.1274
	K00-K14	D50-D53	NA	NA	NA	392	4.58356
	C60-C63	J90-J94	NA	NA	NA	392	3.5274
	I10-I15	M05-M14	A30-A49	NA	NA	391	7.78904
	H30-H36	D50-D53	NA	NA	NA	391	4.15342
	I10-I15	M50-M54	I95-I99	NA	NA	390	8.37945
	I10-I15	I70-I79	A00-A09	NA	NA	390	8.17808
	K20-K31	I60-I69	J09-J18	NA	NA	388	7.70274
	K40-K46	K55-K64	I26-I28	NA	NA	387	7.93973
	G50-G59	F40-F48	NA	NA	NA	387	3.93425
	D10-D36	N30-N39	H25-H28	NA	NA	386	8.71644
	E10-E14	D60-D64	J09-J18	NA	NA	386	8.65616
	I10-I15	K80-K87	A00-A09	NA	NA	386	8.00137
	I80-I89	E70-E90	J95-J99	NA	NA	386	6.70137
	K40-K46	N30-N39	J90-J94	NA	NA	385	8.3589
	I80-I89	M70-M79	N17-N19	NA	NA	384	8.19452
	I10-I15	C60-C63	N17-N19	NA	NA	384	7.17534
	D37-D48	B95-B98	NA	NA	NA	384	2.84795
	E65-E68	A30-A49	NA	NA	NA	384	2.52603
	K20-K31	F10-F19	J95-J99	NA	NA	383	7.63562
	L60-L75	B95-B98	NA	NA	NA	382	5.66438
	K55-K64	C76-C80	N17-N19	NA	NA	382	3.92055
	K40-K46	M50-M54	N17-N19	NA	NA	381	9.24658
	C60-C63	J20-J22	NA	NA	NA	380	3.66712
	I20-I25	G40-G47	H25-H28	NA	NA	379	9.5589
	L60-L75	G50-G59	NA	NA	NA	379	6.34795
	H00-H06	N17-N19	NA	NA	NA	378	5.60685
	M65-M68	E65-E68	NA	NA	NA	377	4.99178
	K20-K31	F10-F19	F40-F48	NA	NA	376	7.99726
	C81-C96	K00-K14	NA	NA	NA	376	2.49041
	I10-I15	L00-L08	A00-A09	NA	NA	372	8.69863
	G40-G47	M80-M85	NA	NA	NA	372	5.20137
	I80-I89	M15-M19	J09-J18	NA	NA	371	8.62192
	I20-I25	M70-M79	I60-I69	NA	NA	371	8.42192
	K40-K46	E70-E90	I26-I28	NA	NA	370	7.95616
	M15-M19	H25-H28	N17-N19	NA	NA	370	7.80685
	J30-J39	F40-F48	NA	NA	NA	369	6.03288
	C81-C96	K50-K52	NA	NA	NA	369	2.2137
	K20-K31	K80-K87	A00-A09	NA	NA	368	7.92877
	H00-H06	J09-J18	NA	NA	NA	368	5.08356
	I10-I15	C76-C80	A30-A49	NA	NA	368	4.19315
	G50-G59	A30-A49	NA	NA	NA	368	3.70274
	K40-K46	E70-E90	H90-H95	NA	NA	366	8.43288
	I20-I25	M15-M19	J95-J99	NA	NA	365	8.26849
	J30-J39	K55-K64	M05-M14	NA	NA	364	9.62329
	I10-I15	L00-L08	I95-I99	NA	NA	364	8.2274
	N20-N23	A00-A09	NA	NA	NA	362	4.72192
	I20-I25	G50-G59	N17-N19	NA	NA	361	8.92877
	I20-I25	L00-L08	H25-H28	NA	NA	360	9.42466
	I20-I25	M45-M49	N17-N19	NA	NA	360	8.94247
	I80-I89	M70-M79	J09-J18	NA	NA	360	7.85205
	E10-E14	F10-F19	N17-N19	NA	NA	359	8.35342
	I10-I15	H30-H36	D60-D64	NA	NA	359	7.99452
	K20-K31	C76-C80	D60-D64	NA	NA	358	4.53014
	H30-H36	A00-A09	NA	NA	NA	357	4.59178
	I20-I25	I70-I79	I95-I99	NA	NA	355	8.87945
	E10-E14	H25-H28	J09-J18	NA	NA	354	9.13836
	I10-I15	M45-M49	A00-A09	NA	NA	354	8.08904
	H00-H06	M45-M49	NA	NA	NA	354	4.97397
	D37-D48	A30-A49	NA	NA	NA	354	1.66575
	I20-I25	H25-H28	J90-J94	NA	NA	352	8.1
	I20-I25	B95-B98	A00-A09	NA	NA	351	8.44658
	C64-C68	B95-B98	NA	NA	NA	351	3.08493
	C81-C96	J90-J94	NA	NA	NA	351	2
	C64-C68	D60-D64	NA	NA	NA	351	1.95342
	I10-I15	F30-F39	A00-A09	NA	NA	350	7.39315
	K50-K52	I26-I28	NA	NA	NA	350	3.93699
	K20-K31	F10-F19	J90-J94	NA	NA	349	7.69315
	N20-N23	D60-D64	NA	NA	NA	349	4.31233
	K50-K52	N10-N16	NA	NA	NA	349	3.89041
	K20-K31	C15-C26	D60-D64	NA	NA	348	4.39726
	I20-I25	H30-H36	N17-N19	NA	NA	347	8.61644
	I10-I15	C60-C63	C76-C80	NA	NA	347	5.32877
	M70-M79	N25-N29	NA	NA	NA	346	4.79589
	J30-J39	A30-A49	NA	NA	NA	346	4.53699
	I20-I25	M70-M79	I95-I99	NA	NA	345	8.91233
	I20-I25	M05-M14	I95-I99	NA	NA	345	8.4411
	K40-K46	I70-I79	J09-J18	NA	NA	345	8.19178
	I10-I15	I30-I52	D60-D64	J09-J18	NA	343	10.0137
	I10-I15	L00-L08	J90-J94	NA	NA	343	7.58082
	N20-N23	M45-M49	NA	NA	NA	343	6.23562
	K20-K31	H25-H28	J90-J94	NA	NA	340	8.3726
	I20-I25	H25-H28	D50-D53	NA	NA	338	9.14247
	I20-I25	N30-N39	A30-A49	NA	NA	338	8.39315
	K20-K31	E70-E90	K65-K67	NA	NA	338	7.56301
	M50-M54	I26-I28	NA	NA	NA	338	5.07808
	H30-H36	J90-J94	NA	NA	NA	338	3.24658
	K40-K46	N30-N39	C76-C80	NA	NA	337	7.51507
	K40-K46	K55-K64	N10-N16	NA	NA	337	7.24384
	C60-C63	N10-N16	NA	NA	NA	337	2.30959
	I20-I25	F30-F39	J09-J18	NA	NA	336	8.41781
	N40-N51	D60-D64	J09-J18	NA	NA	336	6.76712
	I10-I15	K55-K64	E65-E68	N17-N19	NA	335	9.72603
	I10-I15	E65-E68	A00-A09	NA	NA	333	8.40822
	I20-I25	D60-D64	A00-A09	NA	NA	332	8.27397
	K55-K64	E65-E68	J09-J18	NA	NA	331	6.83014
	K20-K31	F30-F39	A00-A09	NA	NA	330	7.70274
	L60-L75	F30-F39	NA	NA	NA	330	6.05205
	H00-H06	E65-E68	NA	NA	NA	330	5.35205
	C81-C96	J95-J99	NA	NA	NA	330	1.66575
	C15-C26	I26-I28	NA	NA	NA	329	0.780822
	K20-K31	M15-M19	A30-A49	NA	NA	327	8.77534
	I20-I25	M05-M14	D50-D53	NA	NA	327	8.36986
	I80-I89	D60-D64	J09-J18	NA	NA	327	6.50411
	K50-K52	H90-H95	NA	NA	NA	326	5.19726
	I10-I15	K80-K87	A30-A49	NA	NA	325	7.26849
	I10-I15	L00-L08	D50-D53	NA	NA	324	8.82055
	E10-E14	K80-K87	N17-N19	NA	NA	324	8.15068
	K40-K46	I60-I69	N17-N19	NA	NA	324	7.96301
	K20-K31	C76-C80	J09-J18	NA	NA	324	4.97671
	M15-M19	D60-D64	J09-J18	NA	NA	323	6.5863
	J30-J39	E00-E07	NA	NA	NA	323	5.54247
	I10-I15	F30-F39	I95-I99	NA	NA	322	7.93151
	G50-G59	K70-K77	NA	NA	NA	321	4.70959
	D37-D48	J20-J22	NA	NA	NA	321	3.40548
	D37-D48	C81-C96	NA	NA	NA	321	1.32055
	I20-I25	E65-E68	J09-J18	NA	NA	319	8.85753
	K20-K31	M15-M19	C15-C26	NA	NA	319	7
	K80-K87	D70-D77	NA	NA	NA	319	2.24932
	I80-I89	I70-I79	N17-N19	NA	NA	318	7.53836
	K20-K31	E70-E90	D60-D64	J09-J18	NA	317	9.4
	I20-I25	H25-H28	I95-I99	NA	NA	317	8.87123
	K50-K52	N25-N29	NA	NA	NA	317	4.00274
	F10-F19	K65-K67	NA	NA	NA	317	2.52877
	E10-E14	N30-N39	D50-D53	NA	NA	316	8.57123
	I20-I25	I70-I79	A00-A09	NA	NA	315	8.83014
	E10-E14	I70-I79	D60-D64	NA	NA	315	8.75342
	I20-I25	M05-M14	A00-A09	NA	NA	315	8.05205
	K20-K31	H25-H28	A00-A09	NA	NA	315	8.04932
	M15-M19	J20-J22	J09-J18	NA	NA	315	7.31507
	D37-D48	J90-J94	NA	NA	NA	315	2.56986
	I20-I25	G40-G47	K90-K93	NA	NA	314	8.65068
	I20-I25	I70-I79	D50-D53	NA	NA	313	8.8137
	I10-I15	H25-H28	A30-A49	NA	NA	313	8.67671
	K40-K46	F30-F39	J09-J18	NA	NA	313	8.49041
	I10-I15	K90-K93	A30-A49	NA	NA	312	6.95068
	I20-I25	G50-G59	H25-H28	NA	NA	311	10.1123
	K40-K46	E65-E68	N17-N19	NA	NA	311	8.03014
	I10-I15	D37-D48	N17-N19	NA	NA	310	7.41918
	I10-I15	L00-L08	J95-J99	NA	NA	309	7.97808
	I10-I15	I60-I69	A00-A09	NA	NA	309	7.76164
	N20-N23	F30-F39	NA	NA	NA	309	6.02466
	C81-C96	L80-L99	NA	NA	NA	309	3.88219
	M80-M85	J95-J99	NA	NA	NA	309	2.58356
	I10-I15	H30-H36	J09-J18	NA	NA	308	7.72329
	K40-K46	N30-N39	J95-J99	NA	NA	307	8.03836
	I10-I15	M45-M49	D50-D53	NA	NA	307	7.67397
	K20-K31	C15-C26	J09-J18	NA	NA	307	5.03014
	K50-K52	G90-G99	NA	NA	NA	304	4.0411
	I26-I28	A00-A09	NA	NA	NA	303	1.79452
	E10-E14	G50-G59	N17-N19	NA	NA	302	9.40959
	N40-N51	I60-I69	N17-N19	NA	NA	302	6.99589
	E10-E14	H25-H28	D50-D53	NA	NA	301	8.78356
	I10-I15	F30-F39	D50-D53	NA	NA	300	7.52329
	I80-I89	F10-F19	J09-J18	NA	NA	300	7.36301
	L60-L75	I70-I79	NA	NA	NA	300	6.21918
	C15-C26	E70-E90	J09-J18	NA	NA	300	4.40137
	E10-E14	E65-E68	J09-J18	NA	NA	299	8.26301
	H30-H36	I95-I99	NA	NA	NA	298	4.4726
	C60-C63	D70-D77	NA	NA	NA	298	1.64384
	M70-M79	F10-F19	J09-J18	NA	NA	297	7.34521
	I10-I15	C76-C80	J20-J22	NA	NA	297	5.63288
	C60-C63	I95-I99	NA	NA	NA	297	2.71781
	K55-K64	C76-C80	J20-J22	NA	NA	296	3.88493
	C64-C68	J09-J18	NA	NA	NA	296	2.41096
	K20-K31	E70-E90	J20-J22	J09-J18	NA	295	9.75342
	K40-K46	M45-M49	N17-N19	NA	NA	295	8.43562
	I20-I25	M05-M14	J95-J99	NA	NA	295	7.93699
	K40-K46	I60-I69	J09-J18	NA	NA	295	7.74795
	K20-K31	M15-M19	C76-C80	NA	NA	295	7.36164
	K40-K46	F10-F19	I95-I99	NA	NA	295	7.22466
	M80-M85	A00-A09	NA	NA	NA	295	3.32877
	J40-J47	E65-E68	N17-N19	NA	NA	294	7.13014
	H53-H54	J09-J18	NA	NA	NA	294	3.24384
	F10-F19	D60-D64	J09-J18	NA	NA	293	5.53425
	I10-I15	C76-C80	A00-A09	NA	NA	293	5.15342
	D37-D48	A00-A09	NA	NA	NA	293	2.43836
	K40-K46	L00-L08	J09-J18	NA	NA	292	7.96027
	K40-K46	D60-D64	A30-A49	NA	NA	292	7.40548
	H00-H06	I70-I79	NA	NA	NA	292	5.13973
	I20-I25	H25-H28	J95-J99	NA	NA	291	8.17534
	M15-M19	H25-H28	J09-J18	NA	NA	291	7.12877
	K40-K46	C76-C80	D60-D64	NA	NA	291	5.76986
	I20-I25	G40-G47	I95-I99	NA	NA	290	8.95342
	I20-I25	C15-C26	C76-C80	NA	NA	290	5.76849
	I20-I25	M45-M49	J09-J18	NA	NA	289	8.30137
	K20-K31	E65-E68	J09-J18	NA	NA	289	7.99452
	I20-I25	K55-K64	K65-K67	NA	NA	289	7.78356
	K40-K46	F10-F19	J95-J99	NA	NA	289	7.60274
	C81-C96	L00-L08	NA	NA	NA	289	2.67123
	I20-I25	G50-G59	J09-J18	NA	NA	288	9.68904
	I80-I89	F10-F19	N17-N19	NA	NA	288	7.00548
	E10-E14	L00-L08	J09-J18	NA	NA	287	9.40548
	I20-I25	K55-K64	D70-D77	NA	NA	286	8.4589
	N40-N51	H25-H28	J09-J18	NA	NA	286	7.96986
	K20-K31	K80-K87	A30-A49	NA	NA	286	7.39726
	N40-N51	E65-E68	N17-N19	NA	NA	286	6.51233
	I20-I25	H25-H28	A00-A09	NA	NA	285	9.60274
	K20-K31	C15-C26	N17-N19	NA	NA	285	4.70137
	I20-I25	M70-M79	J95-J99	NA	NA	283	9.05753
	M70-M79	F10-F19	N17-N19	NA	NA	283	7.83014
	D37-D48	J95-J99	NA	NA	NA	283	2.38082
	E10-E14	K20-K31	I30-I52	D60-D64	NA	282	10.8534
	K20-K31	I70-I79	I95-I99	NA	NA	282	7.76986
	E10-E14	N30-N39	A30-A49	NA	NA	281	7.52055
	N20-N23	J90-J94	NA	NA	NA	281	5.70411
	E00-E07	A00-A09	NA	NA	NA	281	3.13699
	J30-J39	K20-K31	M45-M49	NA	NA	280	10.2808
	K40-K46	F10-F19	J90-J94	NA	NA	280	7.13973
	I10-I15	C76-C80	D70-D77	NA	NA	280	3.11644
	I10-I15	F30-F39	A30-A49	NA	NA	279	7.6
	I10-I15	I60-I69	A30-A49	NA	NA	278	7.58904
	N10-N16	A00-A09	NA	NA	NA	278	2.69452
	K40-K46	E70-E90	N25-N29	NA	NA	277	7.48767
	I10-I15	F30-F39	J95-J99	NA	NA	277	7.21918
	K55-K64	C76-C80	D70-D77	NA	NA	277	2.3589
	E10-E14	I80-I89	E70-E90	N17-N19	NA	276	11.1452
	M20-M25	M05-M14	J09-J18	NA	NA	276	8.49863
	N20-N23	J20-J22	NA	NA	NA	276	5.07123
	K40-K46	K55-K64	G90-G99	NA	NA	275	7.91507
	G40-G47	D70-D77	NA	NA	NA	275	4.43562
	M70-M79	D60-D64	J09-J18	NA	NA	274	7.16986
	D37-D48	L00-L08	NA	NA	NA	274	4.51644
	K40-K46	M15-M19	A30-A49	NA	NA	273	9.10411
	I20-I25	D60-D64	A30-A49	NA	NA	273	8.13425
	K20-K31	C76-C80	N17-N19	NA	NA	273	4.3589
	K20-K31	C15-C26	J90-J94	NA	NA	271	4.66575
	I20-I25	M15-M19	A30-A49	NA	NA	270	8.72466
	I80-I89	E65-E68	N17-N19	NA	NA	270	7.21918
	K50-K52	D60-D64	J09-J18	NA	NA	270	5.98767
	C81-C96	I95-I99	NA	NA	NA	270	1.63425
	I20-I25	K55-K64	J20-J22	J09-J18	NA	269	10.4575
	K20-K31	I30-I52	D60-D64	J09-J18	NA	267	9.90959
	E00-E07	I95-I99	NA	NA	NA	267	2.70959
	K50-K52	N40-N51	H25-H28	NA	NA	266	8.36438
	K00-K14	H90-H95	NA	NA	NA	266	4.38082
	E10-E14	B95-B98	A00-A09	NA	NA	265	8.77808
	D10-D36	J20-J22	J09-J18	NA	NA	265	6.86575
	H30-H36	J95-J99	NA	NA	NA	265	3.47671
	E10-E14	M05-M14	D50-D53	NA	NA	264	8.34521
	I10-I15	D50-D53	A30-A49	NA	NA	264	7.30274
	I70-I79	D60-D64	J09-J18	NA	NA	264	6.44658
	J30-J39	K20-K31	N17-N19	NA	NA	263	11.011
	K50-K52	I30-I52	I95-I99	NA	NA	261	7.26027
	D37-D48	K00-K14	NA	NA	NA	261	3.52055
	K40-K46	C76-C80	J09-J18	NA	NA	260	5.71507
	M50-M54	K65-K67	NA	NA	NA	260	4.60137
	E10-E14	D60-D64	A00-A09	NA	NA	259	9.0274
	K40-K46	H25-H28	J90-J94	NA	NA	259	7.82192
	I20-I25	C76-C80	J09-J18	NA	NA	259	7.69863
	D37-D48	C64-C68	N30-N39	NA	NA	259	2.40822
	I20-I25	K00-K14	N17-N19	NA	NA	258	9.42466
	K20-K31	K80-K87	I95-I99	NA	NA	257	6.85753
	H00-H06	J20-J22	NA	NA	NA	257	5.57534
	N20-N23	K55-K64	N17-N19	NA	NA	256	8.83425
	I20-I25	N30-N39	C76-C80	NA	NA	256	8.48493
	N40-N51	M45-M49	N17-N19	NA	NA	256	8.10959
	C60-C63	I26-I28	NA	NA	NA	256	2.99041
	I80-I89	M15-M19	I95-I99	NA	NA	254	8.01096
	I20-I25	G40-G47	J90-J94	NA	NA	254	7.89315
	K20-K31	L00-L08	J90-J94	NA	NA	254	7.75479
	H40-H42	J09-J18	NA	NA	NA	254	2.96164
	I20-I25	G40-G47	J95-J99	NA	NA	253	8.66301
	K20-K31	F30-F39	I95-I99	NA	NA	253	7.58904
	K50-K52	H53-H54	NA	NA	NA	253	5.1863
	H30-H36	A30-A49	NA	NA	NA	253	4.10685
	I10-I15	E65-E68	A30-A49	NA	NA	252	8.31233
	I20-I25	C76-C80	N17-N19	NA	NA	251	8.0137
	E10-E14	H30-H36	D60-D64	NA	NA	250	9.9863
	K20-K31	I70-I79	J95-J99	NA	NA	250	7.79726
	K50-K52	I30-I52	J90-J94	NA	NA	250	7.24658
	J30-J39	M80-M85	NA	NA	NA	250	5.16712
	C64-C68	N30-N39	N17-N19	NA	NA	250	4.58493
	C15-C26	C76-C80	N17-N19	NA	NA	250	1.88904
	N40-N51	I60-I69	J09-J18	NA	NA	247	7.08219
	K55-K64	F30-F39	I95-I99	NA	NA	247	6.86575
	M80-M85	A30-A49	NA	NA	NA	247	2.3863
	I10-I15	K80-K87	C76-C80	NA	NA	246	6.79726
	C64-C68	E65-E68	NA	NA	NA	246	2.92603
	I80-I89	I70-I79	J09-J18	NA	NA	245	7.28767
	M70-M79	E65-E68	N17-N19	NA	NA	245	7.0274
	E10-E14	C15-C26	C76-C80	NA	NA	244	4.08904
	C64-C68	J90-J94	NA	NA	NA	244	2.40959
	C15-C26	C76-C80	A30-A49	NA	NA	244	1.67808
	J30-J39	K20-K31	K80-K87	NA	NA	243	9.80274
	C15-C26	C76-C80	J09-J18	NA	NA	243	1.92055
	I20-I25	K55-K64	E65-E68	N17-N19	NA	242	10.3438
	M45-M49	I26-I28	NA	NA	NA	242	2.62329
	I20-I25	K55-K64	I60-I69	N17-N19	NA	241	10.4027
	I20-I25	L00-L08	A00-A09	NA	NA	241	9.07123
	I20-I25	M50-M54	J95-J99	NA	NA	239	9.35342
	K20-K31	M70-M79	C76-C80	NA	NA	239	7.64384
	I20-I25	C76-C80	D60-D64	NA	NA	239	7.38356
	K40-K46	C76-C80	N17-N19	NA	NA	239	5.52603
	L60-L75	M65-M68	NA	NA	NA	239	5.37534
	I20-I25	I60-I69	A00-A09	NA	NA	238	8.50685
	C64-C68	K90-K93	NA	NA	NA	238	3.26438
	I20-I25	K80-K87	A00-A09	NA	NA	237	8.01096
	I10-I15	M45-M49	A30-A49	NA	NA	237	7.58356
	I80-I89	F10-F19	I95-I99	NA	NA	237	5.62466
	C81-C96	K90-K93	NA	NA	NA	237	2.50685
	M20-M25	D60-D64	J09-J18	NA	NA	236	7.76301
	I10-I15	C76-C80	I95-I99	NA	NA	236	6.13425
	N20-N23	J95-J99	NA	NA	NA	236	5.30959
	N20-N23	A30-A49	NA	NA	NA	236	4.56301
	K20-K31	C76-C80	A30-A49	NA	NA	236	3.81918
	D37-D48	I95-I99	NA	NA	NA	236	2.1411
	E10-E14	D60-D64	A30-A49	NA	NA	235	8.58082
	N40-N51	C76-C80	D60-D64	NA	NA	235	4.94521
	K40-K46	E70-E90	J20-J22	J09-J18	NA	234	10.3493
	J40-J47	C76-C80	J09-J18	NA	NA	234	4.51233
	I20-I25	K00-K14	J09-J18	NA	NA	233	8.20548
	K20-K31	M70-M79	C15-C26	NA	NA	233	8.10959
	M20-M25	M05-M14	A00-A09	NA	NA	232	8.15068
	I80-I89	M70-M79	I95-I99	NA	NA	232	7.65753
	K55-K64	C76-C80	I95-I99	NA	NA	232	4.01918
	K70-K77	K65-K67	NA	NA	NA	232	1.97945
	J30-J39	D70-D77	NA	NA	NA	231	3.63562
	K20-K31	I30-I52	J20-J22	J09-J18	NA	230	10.2932
	N20-N23	I95-I99	NA	NA	NA	230	4.9863
	I20-I25	E65-E68	A00-A09	NA	NA	229	9.15068
	E70-E90	D50-D53	A30-A49	NA	NA	229	6.20548
	J30-J39	G90-G99	NA	NA	NA	229	4.96438
	K55-K64	D70-D77	J20-J22	NA	NA	228	4.38356
	E10-E14	I70-I79	D50-D53	NA	NA	227	8.66575
	N20-N23	C76-C80	NA	NA	NA	227	4.8411
	I20-I25	L00-L08	D50-D53	NA	NA	226	8.97671
	K40-K46	I70-I79	I95-I99	NA	NA	226	7.90274
	K50-K52	F10-F19	N17-N19	NA	NA	226	7.45205
	I80-I89	M70-M79	J90-J94	NA	NA	226	7.31507
	K20-K31	F30-F39	J95-J99	NA	NA	226	7.19178
	I10-I15	H25-H28	C76-C80	NA	NA	225	7.32877
	D10-D36	N30-N39	C76-C80	NA	NA	225	6.8274
	K20-K31	C81-C96	D70-D77	NA	NA	224	5.76301
	C60-C63	G90-G99	NA	NA	NA	224	2.9863
	K40-K46	C60-C63	N17-N19	NA	NA	223	7.5726
	C64-C68	M45-M49	NA	NA	NA	223	3.68493
	C64-C68	N30-N39	C76-C80	NA	NA	223	3.68493
	C15-C26	N10-N16	NA	NA	NA	223	2.03836
	I20-I25	G50-G59	J20-J22	NA	NA	222	9.09315
	H53-H54	A00-A09	NA	NA	NA	222	2.64658
	M20-M25	E65-E68	N17-N19	NA	NA	221	7.6137
	G40-G47	K65-K67	NA	NA	NA	221	4.25753
	N10-N16	I95-I99	NA	NA	NA	221	2.44384
	K20-K31	I60-I69	A00-A09	NA	NA	220	8.17397
	C81-C96	C76-C80	NA	NA	NA	220	1.30548
	I80-I89	M15-M19	A30-A49	NA	NA	219	7.95342
	M70-M79	I60-I69	N17-N19	NA	NA	219	7.85753
	K20-K31	C76-C80	A00-A09	NA	NA	218	4.90822
	I80-I89	E70-E90	H90-H95	NA	NA	217	8.45479
	D37-D48	M45-M49	NA	NA	NA	217	4.29041
	M20-M25	F10-F19	N17-N19	NA	NA	216	7.52192
	I10-I15	K55-K64	E65-E68	J09-J18	NA	215	9.87123
	D50-D53	K65-K67	NA	NA	NA	215	1.55342
	E10-E14	H25-H28	A00-A09	NA	NA	214	9.08356
	J30-J39	E70-E90	J20-J22	NA	NA	214	8.45616
	N30-N39	C76-C80	J09-J18	NA	NA	214	3.63288
	C64-C68	A00-A09	NA	NA	NA	214	2.66027
	K40-K46	E65-E68	J09-J18	NA	NA	213	8.53151
	I20-I25	G50-G59	K90-K93	NA	NA	213	8.35616
	N40-N51	C60-C63	N17-N19	NA	NA	213	6.35616
	E00-E07	A30-A49	NA	NA	NA	213	3.07945
	J30-J39	K20-K31	A00-A09	NA	NA	212	10.1685
	I20-I25	F30-F39	A00-A09	NA	NA	212	8.24658
	D10-D36	E70-E90	I26-I28	NA	NA	212	7.62877
	K40-K46	C76-C80	A30-A49	NA	NA	212	5.01644
	M20-M25	M05-M14	D50-D53	NA	NA	211	7.79726
	C15-C26	C76-C80	D70-D77	NA	NA	211	1.13425
	E10-E14	K20-K31	N30-N39	D60-D64	NA	210	11.4932
	E10-E14	I70-I79	A00-A09	NA	NA	210	9.70548
	M50-M54	D60-D64	J09-J18	NA	NA	210	7.03836
	I80-I89	M05-M14	I95-I99	NA	NA	210	6.88493
	N40-N51	C60-C63	C76-C80	NA	NA	210	5.30548
	E10-E14	I70-I79	I95-I99	NA	NA	209	8.54521
	K20-K31	N40-N51	K65-K67	NA	NA	209	8.00548
	I10-I15	D70-D77	J20-J22	NA	NA	209	5.98904
	I20-I25	F30-F39	I95-I99	NA	NA	208	9.06438
	I20-I25	H30-H36	J09-J18	NA	NA	208	8.85068
	K40-K46	M15-M19	I26-I28	NA	NA	208	8.36849
	E10-E14	M05-M14	I95-I99	NA	NA	208	7.94384
	I10-I15	K55-K64	C76-C80	J09-J18	NA	208	7.41918
	I10-I15	I80-I89	D60-D64	J09-J18	NA	207	9.89863
	E10-E14	H30-H36	J09-J18	NA	NA	207	9.68493
	E10-E14	L80-L99	A00-A09	NA	NA	207	9.52329
	E10-E14	K20-K31	I70-I79	N17-N19	NA	206	12.2397
	E10-E14	L00-L08	I95-I99	NA	NA	205	9.46301
	M20-M25	M45-M49	N17-N19	NA	NA	205	8.8411
	I10-I15	H30-H36	I95-I99	NA	NA	205	8.83014
	I10-I15	H30-H36	J90-J94	NA	NA	205	7.41096
	K20-K31	D37-D48	N17-N19	NA	NA	205	6.85205
	N40-N51	C76-C80	N17-N19	NA	NA	205	5.08219
	H40-H42	A00-A09	NA	NA	NA	205	3.31781
	C64-C68	A30-A49	NA	NA	NA	205	1.94247
	I10-I15	K55-K64	C76-C80	N17-N19	NA	204	7.65479
	K40-K46	I70-I79	J95-J99	NA	NA	203	8.98356
	K20-K31	C81-C96	J09-J18	NA	NA	203	7.23836
	C60-C63	C76-C80	D60-D64	NA	NA	203	3.75068
	K20-K31	C76-C80	D70-D77	NA	NA	203	3.45753
	C64-C68	J20-J22	NA	NA	NA	203	2.89315
	I20-I25	M15-M19	I26-I28	NA	NA	202	9.0411
	E10-E14	H30-H36	D50-D53	NA	NA	199	9.91507
	I20-I25	G50-G59	I95-I99	NA	NA	199	9.14795
	I20-I25	K90-K93	A30-A49	NA	NA	199	7.69315
	E10-E14	C15-C26	N17-N19	NA	NA	199	7.25205
	K20-K31	C76-C80	J20-J22	NA	NA	199	5.78904
	J30-J39	H53-H54	NA	NA	NA	199	5.66027
	K20-K31	N30-N39	D60-D64	J09-J18	NA	198	9.42192
	N40-N51	C76-C80	J09-J18	NA	NA	198	6.23562
	H90-H95	A30-A49	NA	NA	NA	198	2.09315
	G40-G47	D60-D64	J09-J18	NA	NA	197	7.02192
	K70-K77	G90-G99	NA	NA	NA	196	2.80137
	I80-I89	M15-M19	J95-J99	NA	NA	195	8.48219
	I80-I89	E65-E68	J09-J18	NA	NA	195	7.3589
	K40-K46	C60-C63	C76-C80	NA	NA	195	6.72603
	I20-I25	K80-K87	A30-A49	NA	NA	194	7.03425
	C60-C63	K65-K67	NA	NA	NA	194	2.42466
	I20-I25	K55-K64	I60-I69	J09-J18	NA	193	11.0411
	I10-I15	I80-I89	E65-E68	N17-N19	NA	193	10.6795
	I10-I15	D50-D53	C76-C80	NA	NA	193	6.80822
	N20-N23	K70-K77	NA	NA	NA	193	5.31781
	J40-J47	C76-C80	D60-D64	NA	NA	193	4.41644
	I10-I15	C76-C80	I26-I28	NA	NA	193	3.5726
	I70-I79	K65-K67	NA	NA	NA	192	4.0411
	J30-J39	K40-K46	N17-N19	NA	NA	191	10.9178
	I80-I89	M70-M79	J95-J99	NA	NA	190	7.81781
	N20-N23	E70-E90	J09-J18	NA	NA	190	7.62055
	C15-C26	C76-C80	A00-A09	NA	NA	190	1.57808
	J30-J39	K40-K46	D60-D64	NA	NA	189	9.79452
	K40-K46	C60-C63	D60-D64	NA	NA	189	7.05753
	K20-K31	C15-C26	I95-I99	NA	NA	189	5.46301
	C64-C68	I95-I99	NA	NA	NA	189	2.30137
	K40-K46	I30-I52	J20-J22	J09-J18	NA	187	10.263
	I10-I15	H53-H54	J09-J18	NA	NA	187	7.63288
	M15-M19	D60-D64	A30-A49	NA	NA	186	6.56027
	K40-K46	F10-F19	C76-C80	NA	NA	186	5.70274
	M70-M79	F10-F19	I95-I99	NA	NA	185	6.6137
	J30-J39	K20-K31	J95-J99	NA	NA	184	9.58356
	M70-M79	I60-I69	J09-J18	NA	NA	184	6.97397
	I80-I89	F10-F19	J90-J94	NA	NA	184	6.60548
	I80-I89	C76-C80	J09-J18	NA	NA	184	5.52466
	E10-E14	K55-K64	I60-I69	N17-N19	NA	183	10.3507
	J30-J39	K40-K46	K80-K87	NA	NA	183	9.80274
	K40-K46	N30-N39	I26-I28	NA	NA	183	9.16164
	I20-I25	F30-F39	J95-J99	NA	NA	183	8.15342
	K20-K31	C81-C96	N17-N19	NA	NA	183	7.56712
	M15-M19	H25-H28	J95-J99	NA	NA	183	6.84932
	I10-I15	N40-N51	E65-E68	N17-N19	NA	182	10.5068
	I80-I89	I70-I79	I95-I99	NA	NA	181	7.38356
	N40-N51	E65-E68	J09-J18	NA	NA	181	6.69315
	E10-E14	I30-I52	D60-D64	J09-J18	NA	179	11.1973
	G50-G59	H25-H28	N17-N19	NA	NA	179	7.89041
	E10-E14	C76-C80	N17-N19	NA	NA	179	6.66027
	N40-N51	C60-C63	D60-D64	NA	NA	179	6.47397
	C64-C68	J95-J99	NA	NA	NA	179	2.60274
	H53-H54	A30-A49	NA	NA	NA	179	2.48219
	I10-I15	I70-I79	D60-D64	J09-J18	NA	178	9.92466
	D10-D36	C76-C80	J09-J18	NA	NA	178	6.52877
	M15-M19	C76-C80	D60-D64	NA	NA	178	5.17397
	C64-C68	D50-D53	NA	NA	NA	178	3.73425
	K40-K46	F30-F39	J95-J99	NA	NA	177	7.60274
	I80-I89	F10-F19	J95-J99	NA	NA	177	7.53425
	M70-M79	E65-E68	J09-J18	NA	NA	177	7.51507
	K20-K31	D37-D48	J09-J18	NA	NA	177	6.51507
	D10-D36	C76-C80	N17-N19	NA	NA	177	5.66301
	K20-K31	C15-C26	D70-D77	NA	NA	177	2.68219
	K50-K52	K40-K46	K65-K67	NA	NA	176	7.76027
	K20-K31	C15-C26	J20-J22	NA	NA	176	6.1274
	K40-K46	C76-C80	D70-D77	NA	NA	176	4.54932
	E10-E14	C76-C80	D60-D64	NA	NA	175	5.36438
	K55-K64	C76-C80	I26-I28	NA	NA	175	3.52877
	M20-M25	M05-M14	J95-J99	NA	NA	174	8.6726
	I10-I15	I26-I28	A00-A09	NA	NA	174	6.93836
	K40-K46	F30-F39	I95-I99	NA	NA	173	7.61096
	K20-K31	D70-D77	J20-J22	NA	NA	173	5.96438
	I80-I89	C76-C80	N17-N19	NA	NA	173	4.27945
	F10-F19	C76-C80	J09-J18	NA	NA	173	3.78904
	K20-K31	M15-M19	H25-H28	N17-N19	NA	172	11.3822
	I10-I15	M70-M79	E65-E68	N17-N19	NA	172	11.1397
	E10-E14	L00-L08	J95-J99	NA	NA	172	9
	K20-K31	I60-I69	A30-A49	NA	NA	172	8.1137
	I80-I89	M15-M19	C76-C80	NA	NA	172	6.90685
	K20-K31	C15-C26	J95-J99	NA	NA	172	4.51644
	M20-M25	M45-M49	J09-J18	NA	NA	171	8.27945
	I20-I25	G50-G59	J90-J94	NA	NA	169	8.17808
	D10-D36	C76-C80	D60-D64	NA	NA	169	6.13973
	E10-E14	H25-H28	A30-A49	NA	NA	168	9.33014
	I80-I89	E70-E90	K65-K67	NA	NA	167	7.43562
	K20-K31	C76-C80	I95-I99	NA	NA	167	5.46301
	J40-J47	C76-C80	N17-N19	NA	NA	167	3.93973
	I20-I25	C64-C68	N17-N19	NA	NA	166	7.2863
	L60-L75	H90-H95	NA	NA	NA	166	6.81918
	K00-K14	D60-D64	J09-J18	NA	NA	166	6.56438
	I20-I25	C15-C26	J09-J18	NA	NA	166	6.42192
	H40-H42	D50-D53	NA	NA	NA	166	3.14795
	E10-E14	K20-K31	I60-I69	N17-N19	NA	165	12.0384
	J30-J39	K20-K31	J90-J94	NA	NA	165	9.72329
	M20-M25	M05-M14	J90-J94	NA	NA	165	8.1726
	K20-K31	C15-C26	K65-K67	NA	NA	165	5.98904
	K20-K31	F10-F19	I26-I28	NA	NA	164	8.31507
	N40-N51	H25-H28	J95-J99	NA	NA	164	7.16712
	I20-I25	G50-G59	J95-J99	NA	NA	163	8.92877
	I20-I25	D50-D53	A30-A49	NA	NA	163	8.61096
	K40-K46	K80-K87	C76-C80	NA	NA	163	6.74795
	M50-M54	I60-I69	J09-J18	NA	NA	162	6.73425
	I10-I15	K20-K31	I30-I52	D60-D64	J09-J18	161	11.9534
	E10-E14	E65-E68	A30-A49	NA	NA	161	7.7589
	K40-K46	C81-C96	J09-J18	NA	NA	161	7.48219
	D37-D48	I26-I28	NA	NA	NA	161	3.18356
	J30-J39	K20-K31	K70-K77	NA	NA	160	8.38082
	K40-K46	C76-C80	J20-J22	NA	NA	160	7.24795
	I10-I15	K80-K87	D70-D77	NA	NA	160	6.92055
	K40-K46	M05-M14	C76-C80	NA	NA	160	6.47534
	M15-M19	C76-C80	J09-J18	NA	NA	159	5.74247
	K40-K46	C76-C80	A00-A09	NA	NA	159	5.10685
	K40-K46	I60-I69	A00-A09	NA	NA	158	7.84384
	E10-E14	E70-E90	B95-B98	A00-A09	NA	157	10.6192
	I10-I15	N10-N16	A00-A09	NA	NA	157	8.84384
	K40-K46	K55-K64	I60-I69	N17-N19	NA	156	10.5493
	I20-I25	C76-C80	J20-J22	NA	NA	156	7.68904
	I10-I15	E65-E68	C76-C80	NA	NA	156	6.97123
	E10-E14	K80-K87	I95-I99	NA	NA	155	8.53699
	I20-I25	C76-C80	A00-A09	NA	NA	154	7.84932
	K40-K46	C60-C63	J09-J18	NA	NA	153	7.94247
	N40-N51	C60-C63	J09-J18	NA	NA	153	6.50137
	G50-G59	D60-D64	J09-J18	NA	NA	153	6.36986
	J30-J39	K40-K46	A00-A09	NA	NA	152	10.6342
	K50-K52	I60-I69	J09-J18	NA	NA	152	7.79178
	M65-M68	H90-H95	NA	NA	NA	152	5.98356
	N40-N51	C76-C80	A30-A49	NA	NA	152	4.78082
	I20-I25	H30-H36	J90-J94	NA	NA	151	7.61096
	K40-K46	C81-C96	N17-N19	NA	NA	151	7.49041
	J30-J39	D10-D36	J09-J18	NA	NA	149	9.41096
	I20-I25	C76-C80	A30-A49	NA	NA	149	7.80822
	E10-E14	H30-H36	A00-A09	NA	NA	148	11.137
	J30-J39	K20-K31	C76-C80	NA	NA	148	8.99315
	E10-E14	C76-C80	J09-J18	NA	NA	148	4.99726
	E10-E14	D50-D53	A30-A49	NA	NA	147	8.75342
	E10-E14	I60-I69	A30-A49	NA	NA	147	8.31507
	K50-K52	F10-F19	I95-I99	NA	NA	147	6.10411
	J30-J39	K20-K31	I95-I99	NA	NA	146	9.54384
	E10-E14	M45-M49	A00-A09	NA	NA	146	8.99452
	J30-J39	K40-K46	D50-D53	NA	NA	145	10.7781
	E10-E14	I60-I69	A00-A09	NA	NA	145	9.19726
	G50-G59	E65-E68	N17-N19	NA	NA	145	7.6411
	M70-M79	C76-C80	J09-J18	NA	NA	145	6.05753
	C81-C96	K70-K77	NA	NA	NA	145	3.4274
	I20-I25	I70-I79	D60-D64	J09-J18	NA	144	10.7233
	I20-I25	H00-H06	N17-N19	NA	NA	144	10.3726
	F10-F19	C76-C80	D60-D64	NA	NA	144	3.79041
	I10-I15	M50-M54	D60-D64	J09-J18	NA	143	10.1123
	J30-J39	K40-K46	J95-J99	NA	NA	143	9.8411
	K40-K46	I60-I69	A30-A49	NA	NA	143	7.61918
	E10-E14	C15-C26	D60-D64	NA	NA	143	7.27945
	K20-K31	C81-C96	J20-J22	NA	NA	143	6.56986
	C60-C63	C76-C80	J09-J18	NA	NA	143	4.84658
	D37-D48	C15-C26	C76-C80	NA	NA	143	1.64658
	C81-C96	I26-I28	NA	NA	NA	143	1.59452
	J30-J39	D10-D36	N17-N19	NA	NA	142	10.1808
	I20-I25	I70-I79	C76-C80	NA	NA	142	9.87397
	N20-N23	G90-G99	NA	NA	NA	142	4.1726
	J40-J47	C76-C80	A30-A49	NA	NA	142	3.70274
	H30-H36	D70-D77	NA	NA	NA	142	3.59041
	I20-I25	H30-H36	I95-I99	NA	NA	141	8.49041
	E10-E14	K90-K93	A30-A49	NA	NA	141	6.41644
	K20-K31	M80-M85	J95-J99	NA	NA	140	7.9726
	K40-K46	F10-F19	I26-I28	NA	NA	138	6.99726
	D10-D36	C76-C80	A30-A49	NA	NA	138	5.6137
	I20-I25	M15-M19	J20-J22	J09-J18	NA	137	10.7123
	I10-I15	M80-M85	A30-A49	NA	NA	137	7.26301
	M15-M19	K80-K87	I95-I99	NA	NA	137	6.89315
	I20-I25	N40-N51	I60-I69	N17-N19	NA	136	10.4767
	J30-J39	K20-K31	K55-K64	N17-N19	NA	134	12.7151
	J30-J39	K20-K31	E70-E90	N17-N19	NA	134	11.8041
	K40-K46	M15-M19	H25-H28	N17-N19	NA	134	10.8849
	J30-J39	K40-K46	J90-J94	NA	NA	134	10.4904
	D10-D36	C60-C63	C76-C80	NA	NA	134	6.49726
	K40-K46	N30-N39	D60-D64	J09-J18	NA	133	10.4137
	I10-I15	G50-G59	H25-H28	N17-N19	NA	133	10.3205
	M20-M25	M45-M49	A00-A09	NA	NA	132	8.86849
	K20-K31	C15-C26	E70-E90	J09-J18	NA	132	8.71507
	N20-N23	K65-K67	NA	NA	NA	132	3.91233
	D37-D48	K65-K67	NA	NA	NA	132	1.3589
	I20-I25	C76-C80	I95-I99	NA	NA	131	8.08493
	C15-C26	N30-N39	A30-A49	NA	NA	131	3.10685
	K20-K31	C76-C80	I26-I28	NA	NA	131	2.70411
	K20-K31	F10-F19	K65-K67	NA	NA	130	6.66438
	K40-K46	C76-C80	I95-I99	NA	NA	130	6.52466
	M15-M19	C76-C80	N17-N19	NA	NA	130	5.93973
	E10-E14	G50-G59	I95-I99	NA	NA	129	9.26575
	E10-E14	C15-C26	J09-J18	NA	NA	129	6.82192
	I20-I25	K80-K87	C76-C80	NA	NA	128	7.99041
	K40-K46	D70-D77	J20-J22	NA	NA	128	7.13562
	E10-E14	H30-H36	J95-J99	NA	NA	127	9.18356
	D10-D36	C60-C63	N17-N19	NA	NA	127	6.8274
	D10-D36	C76-C80	J20-J22	NA	NA	127	5.84658
	C64-C68	I26-I28	NA	NA	NA	127	1.77808
	K20-K31	E00-E07	I95-I99	NA	NA	126	7.59452
	E10-E14	C76-C80	A30-A49	NA	NA	126	3.84658
	K20-K31	H53-H54	J09-J18	NA	NA	125	9.01918
	I20-I25	M05-M14	C76-C80	NA	NA	125	8.62192
	I20-I25	H53-H54	J09-J18	NA	NA	125	8.52877
	H40-H42	A30-A49	NA	NA	NA	125	3.26301
	L60-L75	M15-M19	H25-H28	NA	NA	124	9.29589
	D37-D48	C81-C96	D70-D77	NA	NA	124	4.07945
	K40-K46	D50-D53	C76-C80	NA	NA	123	7.43014
	D10-D36	C76-C80	A00-A09	NA	NA	122	5.36027
	I20-I25	M70-M79	I60-I69	N17-N19	NA	121	11.5726
	N40-N51	C76-C80	D70-D77	NA	NA	121	4.86849
	I20-I25	H30-H36	J95-J99	NA	NA	120	8.48904
	K40-K46	C60-C63	J20-J22	NA	NA	120	8.28082
	K40-K46	I70-I79	C76-C80	NA	NA	120	7.33836
	H30-H36	D60-D64	J09-J18	NA	NA	120	6.16027
	C15-C26	K90-K93	A30-A49	NA	NA	120	3.25068
	N20-N23	K55-K64	C76-C80	NA	NA	119	6.52877
	I20-I25	K55-K64	C76-C80	N17-N19	NA	118	9.56575
	M05-M14	C76-C80	J09-J18	NA	NA	118	4.13836
	K20-K31	E70-E90	D50-D53	A30-A49	NA	117	9.70137
	I20-I25	C64-C68	C76-C80	NA	NA	117	6.50959
	K20-K31	C15-C26	I26-I28	NA	NA	117	2.55616
	E10-E14	H30-H36	I30-I52	D60-D64	NA	116	11.8247
	D10-D36	C76-C80	D70-D77	NA	NA	116	4.47123
	N20-N23	E70-E90	I95-I99	NA	NA	115	8.39452
	I10-I15	H53-H54	A30-A49	NA	NA	115	7.66575
	E10-E14	H30-H36	A30-A49	NA	NA	114	9.41507
	N40-N51	C60-C63	J20-J22	NA	NA	114	6.77808
	F10-F19	C76-C80	N17-N19	NA	NA	114	3.41918
	M20-M25	E65-E68	A00-A09	NA	NA	113	6.88219
	I10-I15	C15-C26	C76-C80	N17-N19	NA	113	6.09589
	C64-C68	D70-D77	NA	NA	NA	113	2.14795
	I20-I25	I26-I28	A00-A09	NA	NA	112	7.55342
	K40-K46	K55-K64	C76-C80	N17-N19	NA	112	7.29178
	K40-K46	C60-C63	J90-J94	NA	NA	112	6.57945
	I20-I25	C76-C80	D70-D77	NA	NA	111	5.89863
	I10-I15	D50-D53	K65-K67	NA	NA	110	7.21918
	N20-N23	E70-E90	D50-D53	NA	NA	109	9.87123
	N40-N51	C43-C44	A00-A09	NA	NA	109	8.30685
	D10-D36	C60-C63	J09-J18	NA	NA	109	7.31507
	C81-C96	B95-B98	A00-A09	NA	NA	109	4.26849
	K40-K46	C81-C96	A00-A09	NA	NA	108	6.97123
	J40-J47	C76-C80	D70-D77	NA	NA	108	2.36712
	K20-K31	M80-M85	A30-A49	NA	NA	107	7.97534
	M20-M25	M05-M14	C76-C80	NA	NA	107	7.53699
	K20-K31	D37-D48	J95-J99	NA	NA	107	7.0411
	E10-E14	C15-C26	J90-J94	NA	NA	107	6.24932
	M15-M19	C76-C80	A00-A09	NA	NA	107	5.39452
	I10-I15	I30-I52	D50-D53	A30-A49	NA	105	10.1151
	E10-E14	C76-C80	A00-A09	NA	NA	105	5.34795
	J30-J39	M70-M79	N17-N19	NA	NA	104	9.39315
	I20-I25	C64-C68	J09-J18	NA	NA	104	7.82603
	E10-E14	H25-H28	C76-C80	NA	NA	104	7.63425
	C64-C68	K65-K67	NA	NA	NA	104	2.24795
	J30-J39	K40-K46	E70-E90	N17-N19	NA	102	11.9849
	D10-D36	C64-C68	N17-N19	NA	NA	102	7.72466
	I20-I25	D50-D53	C76-C80	NA	NA	102	7.55479
	I20-I25	C64-C68	D60-D64	NA	NA	102	6.31644
	H25-H28	C76-C80	J09-J18	NA	NA	102	4.20548
	E10-E14	M45-M49	J95-J99	NA	NA	101	8.71781
	K40-K46	K55-K64	C76-C80	A30-A49	NA	101	7.09589
	L60-L75	M15-M19	N17-N19	NA	NA	100	11.7699
	E10-E14	C76-C80	J20-J22	NA	NA	98	5.73425
	D37-D48	C81-C96	J09-J18	NA	NA	98	4.57123
	I20-I25	G50-G59	H25-H28	N17-N19	NA	97	11.6219
	J30-J39	M20-M25	N17-N19	NA	NA	97	10.3616
	E10-E14	C15-C26	I95-I99	NA	NA	97	7.08219
	D37-D48	C64-C68	C76-C80	NA	NA	97	2.43014
	I20-I25	H00-H06	J20-J22	NA	NA	96	10.026
	J30-J39	F10-F19	J95-J99	NA	NA	96	7.98219
	D10-D36	C76-C80	I95-I99	NA	NA	96	5.90411
	C60-C63	C76-C80	D70-D77	NA	NA	95	3.40822
	E00-E07	K65-K67	NA	NA	NA	95	3.24658
	J30-J39	F10-F19	N17-N19	NA	NA	94	10.6973
	K20-K31	C81-C96	J95-J99	NA	NA	94	7.20137
	J30-J39	K20-K31	I30-I52	N17-N19	NA	93	11.6411
	K50-K52	F30-F39	I95-I99	NA	NA	93	7.51233
	E10-E14	C15-C26	J95-J99	NA	NA	93	6.73699
	F10-F19	C76-C80	I95-I99	NA	NA	93	4.2
	C64-C68	G90-G99	NA	NA	NA	93	2.82466
	K20-K31	D37-D48	I95-I99	NA	NA	92	7.85342
	I10-I15	H30-H36	D60-D64	J09-J18	NA	91	9.65479
	J30-J39	M50-M54	N17-N19	NA	NA	91	9.51781
	M15-M19	C76-C80	J20-J22	NA	NA	91	5.20548
	F10-F19	C76-C80	D70-D77	NA	NA	91	1.66849
	L60-L75	M15-M19	D60-D64	NA	NA	89	9.12329
	K20-K31	C81-C96	I95-I99	NA	NA	89	7.33151
	I10-I15	C60-C63	C76-C80	N17-N19	NA	89	5.7863
	D37-D48	C76-C80	J09-J18	NA	NA	89	4.59178
	E10-E14	C76-C80	D70-D77	NA	NA	89	3.38356
	D37-D48	C76-C80	N17-N19	NA	NA	89	3.14521
	J30-J39	M15-M19	F40-F48	NA	NA	88	9.3411
	J30-J39	D10-D36	C76-C80	NA	NA	88	7.74521
	K40-K46	C60-C63	D70-D77	NA	NA	88	6.69452
	E10-E14	C76-C80	I95-I99	NA	NA	88	6.67123
	C60-C63	N30-N39	J95-J99	NA	NA	88	6.10274
	J40-J47	C76-C80	I26-I28	NA	NA	87	3.12877
	J30-J39	M70-M79	D50-D53	NA	NA	85	10.6548
	L60-L75	M70-M79	E65-E68	NA	NA	84	10.0562
	J30-J39	M05-M14	D50-D53	NA	NA	84	8.93014
	K40-K46	K55-K64	C76-C80	A00-A09	NA	84	8.86849
	C43-C44	C76-C80	D60-D64	NA	NA	84	4.85068
	J40-J47	C76-C80	I95-I99	NA	NA	84	4.82603
	H25-H28	C76-C80	N17-N19	NA	NA	84	3.99589
	K40-K46	M80-M85	A30-A49	NA	NA	83	7.45753
	D37-D48	C81-C96	N17-N19	NA	NA	83	5.28767
	I20-I25	M15-M19	H25-H28	A00-A09	NA	82	11.6137
	L60-L75	M70-M79	N17-N19	NA	NA	82	11.6027
	K20-K31	C15-C26	C76-C80	N17-N19	NA	80	4.68356
	K20-K31	C15-C26	C76-C80	J09-J18	NA	80	4.30411
	J30-J39	K20-K31	I26-I28	NA	NA	79	10.7452
	C81-C96	K00-K14	A00-A09	NA	NA	79	3.87397
	D37-D48	C76-C80	D70-D77	NA	NA	79	2.10137
	I20-I25	C76-C80	I26-I28	NA	NA	78	7.6726
	M15-M19	D50-D53	C76-C80	NA	NA	78	4.49041
	E10-E14	C15-C26	K65-K67	NA	NA	77	5.76164
	N40-N51	C76-C80	I26-I28	NA	NA	77	4.61644
	K20-K31	M15-M19	C15-C26	C76-C80	NA	75	7.81096
	C43-C44	C76-C80	J09-J18	NA	NA	74	4.67945
	J30-J39	K20-K31	E70-E90	I95-I99	NA	73	10.9616
	H25-H28	C76-C80	A30-A49	NA	NA	73	4.16164
	L60-L75	M70-M79	J09-J18	NA	NA	72	8.50959
	D10-D36	C76-C80	I26-I28	NA	NA	72	5.30822
	K20-K31	C15-C26	C76-C80	D70-D77	NA	72	4.08767
	L60-L75	M15-M19	J09-J18	NA	NA	70	8.64384
	D10-D36	C64-C68	C76-C80	NA	NA	70	6.99178
	E10-E14	C76-C80	I26-I28	NA	NA	70	4.21644
	L60-L75	I70-I79	N17-N19	NA	NA	69	9.55342
	I20-I25	D50-D53	K65-K67	NA	NA	68	9.40685
	I20-I25	C64-C68	I95-I99	NA	NA	68	6.99589
	M15-M19	C76-C80	I95-I99	NA	NA	68	5.12603
	E10-E14	C15-C26	D70-D77	NA	NA	68	4.9
	L60-L75	F10-F19	J09-J18	NA	NA	67	9.24932
	E10-E14	H30-H36	D60-D64	J09-J18	NA	65	11.3671
	J30-J39	M50-M54	D50-D53	NA	NA	65	10.1315
	L60-L75	M50-M54	E65-E68	NA	NA	65	8.86301
	M15-M19	C76-C80	I26-I28	NA	NA	63	4.67945
	J30-J39	M05-M14	I95-I99	NA	NA	62	10.3767
	M70-M79	D50-D53	C76-C80	NA	NA	61	5.59452
	C81-C96	C76-C80	D70-D77	NA	NA	61	3.08219
	E10-E14	I30-I52	D50-D53	A30-A49	NA	59	11.589
	L60-L75	F10-F19	I95-I99	NA	NA	59	8.70411
	C43-C44	C76-C80	A00-A09	NA	NA	59	4.7726
	I10-I15	I30-I52	D50-D53	C76-C80	NA	58	8.83151
	C81-C96	C76-C80	J09-J18	NA	NA	58	3.3726
	J30-J39	K40-K46	E70-E90	I95-I99	NA	57	12.4521
	E10-E14	C15-C26	C76-C80	N17-N19	NA	57	7.66575
	L60-L75	M15-M19	A00-A09	NA	NA	56	9.77534
	K20-K31	N40-N51	C60-C63	C76-C80	NA	54	8.52055
	N20-N23	C76-C80	J09-J18	NA	NA	54	7.57945
	N40-N51	C60-C63	C76-C80	D60-D64	NA	54	6.26575
	D37-D48	C81-C96	J95-J99	NA	NA	54	4.70274
	E10-E14	H30-H36	C76-C80	NA	NA	53	9.97808
	E10-E14	H90-H95	A30-A49	NA	NA	53	7.1726
	C64-C68	N30-N39	K65-K67	NA	NA	53	4.36712
	I20-I25	C15-C26	C76-C80	J09-J18	NA	52	6.52466
	L60-L75	M70-M79	A00-A09	NA	NA	51	11.5068
	L60-L75	M15-M19	I95-I99	NA	NA	49	11.1342
	L60-L75	I70-I79	I95-I99	NA	NA	49	10.6603
	D37-D48	C15-C26	K65-K67	NA	NA	49	2.13425
	L60-L75	M70-M79	J90-J94	NA	NA	47	9.51781
	K20-K31	M15-M19	C76-C80	N17-N19	NA	47	8.15068
	C81-C96	K50-K52	I95-I99	NA	NA	47	5.76438
	H25-H28	C76-C80	I95-I99	NA	NA	47	4.70137
	C81-C96	C76-C80	J20-J22	NA	NA	47	3.91233
	L60-L75	B95-B98	A00-A09	NA	NA	46	9.65616
	K20-K31	M15-M19	C76-C80	A30-A49	NA	46	8.16986
	I10-I15	H25-H28	C76-C80	N17-N19	NA	46	7.78493
	C15-C26	I26-I28	A00-A09	NA	NA	44	2.02466
	K40-K46	C60-C63	C76-C80	D60-D64	NA	43	7.24932
	K40-K46	F10-F19	C76-C80	J09-J18	NA	42	8.67808
	E10-E14	H30-H36	I30-I52	D60-D64	J09-J18	40	13.089
	K20-K31	M70-M79	C76-C80	A30-A49	NA	39	8.27945
	I20-I25	I70-I79	C76-C80	J09-J18	NA	38	11.8233
	L60-L75	F10-F19	C76-C80	NA	NA	35	10.3671
	I20-I25	M15-M19	I26-I28	A00-A09	NA	34	8.15068
	K40-K46	M05-M14	C76-C80	A30-A49	NA	34	5.70548
	N40-N51	C60-C63	C76-C80	J09-J18	NA	32	7.55068
	E10-E14	C15-C26	C76-C80	J09-J18	NA	31	6.47123
	K40-K46	C60-C63	C76-C80	A30-A49	NA	29	6.83836
	L60-L75	K00-K14	I95-I99	NA	NA	26	11.0068
	J30-J39	K20-K31	C76-C80	A30-A49	NA	26	9.60548
	K40-K46	C60-C63	C76-C80	D70-D77	NA	21	4.43836
	N40-N51	C60-C63	C76-C80	I26-I28	NA	19	5.30411

## Sheet: 8. F trajectory death risk
	Diagnosis 1	Diagnosis 2	Diagnosis 3	Diagnosis 4	Diagnosis 5	Statistic	Standard error of statistic	Adjusted P-value of mortality rate multiplier of last diagnosis	Relative 1 year post-diagnosis mortality rate multiplier of last diagnosis	Trajectory frequency	Median duration of trajectory (years)	Sex specificity
	D10-D36	N30-N39	M05-M14	NA	NA	NA	0	0	0	211	9.92055	female unique
	D10-D36	N30-N39	M80-M85	NA	NA	NA	0	0	0	119	11.0986	female unique
	E10-E14	B95-B98	H25-H28	NA	NA	NA	0	0	0	99	9.50959	female unique
	E10-E14	N30-N39	H30-H36	NA	NA	NA	0	0	0	78	10.0603	female unique
	G50-G59	F10-F19	N17-N19	NA	NA	NA	0	0	0	41	9.80822	female unique
	I10-I15	K50-K52	E65-E68	NA	NA	NA	0	0	0	157	8.20548	female unique
	J40-J47	B95-B98	H25-H28	NA	NA	NA	0	0	0	117	8.48219	female unique
	K50-K52	B95-B98	H25-H28	NA	NA	NA	0	0	0	62	8.15616	female unique
	K50-K52	K40-K46	H25-H28	NA	NA	NA	0	0	0	98	10.7658	female unique
	K50-K52	K40-K46	M45-M49	NA	NA	NA	0	0	0	91	9.52055	female unique
	K50-K52	M70-M79	H25-H28	NA	NA	NA	0	0	0	86	9.40411	female unique
	L00-L08	F40-F48	NA	NA	NA	NA	0	0	0	278	5.73699	female unique
	L60-L75	E10-E14	NA	NA	NA	NA	0	0	0	298	7.38082	female unique
	L60-L75	F30-F39	NA	NA	NA	NA	0	0	0	358	8.00548	common
	L60-L75	I70-I79	NA	NA	NA	NA	0	0	0	138	6.7726	common
	L80-L99	H40-H42	NA	NA	NA	NA	0	0	0	182	6.83151	female unique
	M20-M25	M05-M14	M40-M43	NA	NA	NA	0	0	0	77	8.16164	female unique
	N20-N23	I70-I79	NA	NA	NA	NA	0	0	0	63	5.93973	female unique
	N60-N64	J40-J47	D60-D64	NA	NA	NA	0	0	0	30	12.2356	female unique
	N60-N64	J40-J47	M45-M49	NA	NA	NA	0	0	0	34	11.6479	female unique
	N60-N64	L00-L08	NA	NA	NA	NA	0	0	0	220	6.9274	female unique
	N80-N98	E10-E14	F40-F48	NA	NA	NA	0	0	0	98	13.0863	female unique
	N80-N98	G50-G59	F40-F48	NA	NA	NA	0	0	0	131	12.3808	female unique
	N80-N98	I20-I25	F40-F48	NA	NA	NA	0	0	0	143	12.789	female unique
	N80-N98	I80-I89	M50-M54	NA	NA	NA	0	0	0	294	10.5644	female unique
	N80-N98	J30-J39	E65-E68	NA	NA	NA	0	0	0	92	13.0151	female unique
	N80-N98	J30-J39	F30-F39	NA	NA	NA	0	0	0	105	12.1836	female unique
	N80-N98	J40-J47	F30-F39	NA	NA	NA	0	0	0	357	12.0384	female unique
	N80-N98	K00-K14	E65-E68	NA	NA	NA	0	0	0	130	12.1726	female unique
	N80-N98	K50-K52	F30-F39	NA	NA	NA	0	0	0	216	12.1192	female unique
	N80-N98	K50-K52	F40-F48	NA	NA	NA	0	0	0	138	12.1849	female unique
	N80-N98	K55-K64	E65-E68	A00-A09	NA	NA	0	0	0	32	14.3397	female unique
	N80-N98	L80-L99	D50-D53	NA	NA	NA	0	0	0	74	11.2466	female unique
	N80-N98	M50-M54	F10-F19	NA	NA	NA	0	0	0	197	11.4685	female unique
	G50-G59	K40-K46	H40-H42	NA	NA	NA	0	0	2.44e-275	19	11.263	female unique
	N80-N98	M50-M54	D50-D53	N17-N19	NA	NA	0	0	9.68e-260	14	12.7726	female unique
	N80-N98	G50-G59	F30-F39	A00-A09	NA	NA	0	0	8.34e-233	17	14.5973	female unique
	N80-N98	I20-I25	D50-D53	N17-N19	NA	NA	0	0	7.22e-215	14	12.6918	female unique
	N80-N98	J40-J47	F30-F39	J95-J99	NA	NA	0	0	1.14e-181	15	11.1014	female unique
	I10-I15	K50-K52	E65-E68	N17-N19	NA	NA	0	0	8.73e-111	19	9.0137	female unique
	L60-L75	M70-M79	J95-J99	NA	NA	NA	0	0	5.82e-93	20	13.3219	female unique
	N60-N64	J40-J47	K90-K93	NA	NA	NA	0	0	1.85e-89	28	12.8781	female unique
	G50-G59	K55-K64	H40-H42	NA	NA	NA	0	0	5.75e-62	30	9.09178	female unique
	L60-L75	M50-M54	H25-H28	NA	NA	NA	0	0	2.85e-44	30	11.0945	female unique
	N80-N98	K50-K52	F30-F39	A00-A09	NA	NA	0	0	1.81e-39	22	13.9493	female unique
	N60-N64	J40-J47	A00-A09	NA	NA	NA	0	0	3.39e-35	24	13.3849	female unique
	H00-H06	M40-M43	NA	NA	NA	NA	0	0	2.54e-07	107	5.03014	female unique
	I20-I25	B95-B98	H25-H28	NA	NA	NA	0	0	5.12e-06	87	9.55342	female unique
	K20-K31	M05-M14	N17-N19	NA	NA	-4.66002	1.97203	0.00555531	0.000102	225	9.22192	female unique
	K50-K52	E70-E90	N17-N19	NA	NA	-4.59596	1.956	0.00744785	0.000125	183	8.47945	female unique
	D50-D53	J95-J99	NA	NA	NA	-5.8536	1.53204	1.1e-05	0.000127	257	3.3726	female unique
	J40-J47	I60-I69	NA	NA	NA	-7.58307	1.17814	9.9e-11	0.000132	687	5.46027	female unique
	K55-K64	I60-I69	NA	NA	NA	-9.77266	0.913411	5.3e-19	0.000133	1046	5.59863	common
	K55-K64	M05-M14	N17-N19	NA	NA	-4.884	1.81846	0.00194088	0.000139	219	9.10137	female unique
	J40-J47	D50-D53	N17-N19	NA	NA	-4.24101	2.07858	0.0350243	0.000148	108	8.28904	female unique
	I10-I15	D50-D53	A30-A49	NA	NA	-5.20243	1.69128	0.000394	0.000151	90	8.57671	common
	C50-C50	J95-J99	NA	NA	NA	-8.80263	0.996839	4.46e-15	0.000155	345	5.27671	female unique
	K20-K31	E70-E90	J95-J99	NA	NA	-6.31441	1.38576	6.69e-07	0.000158	232	9.35616	common
	J40-J47	I30-I52	N17-N19	NA	NA	-5.66107	1.54015	3.32e-05	0.000163	185	9.12877	female unique
	M70-M79	I60-I69	NA	NA	NA	-6.27099	1.38475	8.79e-07	0.000169	450	5.35479	common
	C50-C50	N17-N19	NA	NA	NA	-10.1488	0.852349	1.24e-20	0.000175	469	6.90959	female unique
	K55-K64	F10-F19	J95-J99	NA	NA	-4.19981	2.05553	0.0415935	0.000178	105	8.4411	female unique
	K20-K31	H25-H28	N17-N19	NA	NA	-4.57432	1.88481	0.00819848	0.00018	193	9.54795	common
	I10-I15	C76-C80	A30-A49	NA	NA	-7.38571	1.1649	4.36e-10	0.000183441	147	5.14795	common
	I10-I15	C76-C80	N17-N19	NA	NA	-8.54398	1.00542	4.22e-14	0.000186	179	5.33699	common
	I80-I89	I30-I52	N17-N19	NA	NA	-4.70725	1.8236	0.00446414	0.000187	114	10.8	common
	I10-I15	G90-G99	NA	NA	NA	-9.26146	0.901171	6.99e-17	0.000237	732	4.36986	common
	N30-N39	J09-J18	NA	NA	NA	-12.4996	0.665118	3.11e-32	0.000245	1074	5.20137	common
	I10-I15	H25-H28	J95-J99	NA	NA	-4.5922	1.8036	0.00757906	0.000253	113	8.65479	common
	N80-N98	M50-M54	N17-N19	NA	NA	-4.33583	1.91008	0.0233939	0.000253	167	12.7507	female unique
	D50-D53	A30-A49	NA	NA	NA	-7.59726	1.08642	8.89e-11	0.00026	239	2.72329	common
	K40-K46	G90-G99	NA	NA	NA	-5.69884	1.44694	2.68e-05	0.000262	339	5.76438	female unique
	K20-K31	I30-I52	N17-N19	NA	NA	-5.61655	1.4669	4.27e-05	0.000264	234	9.18767	common
	D50-D53	N17-N19	NA	NA	NA	-7.87122	1.04556	1.06e-11	0.000267	519	3.12603	female unique
	J30-J39	J95-J99	NA	NA	NA	-5.78319	1.42201	1.66e-05	0.000268	209	5.3726	common
	F30-F39	J95-J99	NA	NA	NA	-7.76017	1.05426	2.54e-11	0.00028	381	3.63288	common
	I80-I89	M70-M79	N17-N19	NA	NA	-4.6572	1.75641	0.00562559	0.00028	110	10.1548	common
	I10-I15	I80-I89	I30-I52	NA	NA	-5.15248	1.58727	0.000509	0.000281	275	8.2137	female unique
	K70-K77	I95-I99	NA	NA	NA	-5.87227	1.38826	9.9e-06	0.000288	223	2.33151	common
	I70-I79	A30-A49	NA	NA	NA	-7.57779	1.0636	1.03e-10	0.000316	174	2.98767	common
	F10-F19	N17-N19	NA	NA	NA	-9.79143	0.822894	4.41e-19	0.000317	489	2.6137	common
	N30-N39	J95-J99	NA	NA	NA	-10.4897	0.767528	3.63e-22	0.000319	636	5.18219	common
	C50-C50	J09-J18	NA	NA	NA	-11.9739	0.671704	1.97e-29	0.000321	531	5.3589	female unique
	J40-J47	E70-E90	N17-N19	NA	NA	-7.08556	1.13514	3.84e-09	0.000321	301	9.91507	female unique
	C43-C44	N17-N19	NA	NA	NA	-5.98801	1.34196	4.96e-06	0.000324	254	4.89863	common
	C76-C80	N17-N19	NA	NA	NA	-16.4998	0.486133	1.71e-57	0.000328	565	1.3589	common
	J40-J47	I30-I52	I95-I99	NA	NA	-4.77457	1.67465	0.00326319	0.000337	112	8.47808	female unique
	J40-J47	N17-N19	NA	NA	NA	-13.7211	0.582311	3.28e-39	0.000339	1409	5.68219	common
	K80-K87	J95-J99	NA	NA	NA	-7.67517	1.03817	4.91e-11	0.000346	419	4.76164	common
	L80-L99	I95-I99	NA	NA	NA	-6.57893	1.2091	1.22e-07	0.000351	326	5.42466	female unique
	C51-C58	J95-J99	NA	NA	NA	-6.40651	1.2399	3.73e-07	0.000355	113	1.88219	female unique
	M20-M25	E70-E90	N17-N19	NA	NA	-5.22592	1.51791	0.00035	0.000359	222	9.85616	female unique
	J40-J47	I95-I99	NA	NA	NA	-9.69237	0.814157	1.16e-18	0.000374	731	5.13151	common
	K40-K46	J95-J99	NA	NA	NA	-9.55695	0.825847	4.3e-18	0.000374	648	5.53562	common
	C15-C26	I30-I52	NA	NA	NA	-8.26364	0.954602	4.45e-13	0.000375	293	1.23562	female unique
	H30-H36	J09-J18	NA	NA	NA	-6.6123	1.19295	9.78e-08	0.000375	210	4.53562	common
	I60-I69	J09-J18	NA	NA	NA	-8.49074	0.927994	6.63e-14	0.000378	335	3.0411	common
	C50-C50	K55-K64	J09-J18	NA	NA	-6.0978	1.29198	2.54e-06	0.000379	81	9.26027	female unique
	I10-I15	A30-A49	NA	NA	NA	-16.1856	0.486302	2.94e-55	0.000382	1150	4.16575	common
	J30-J39	I30-I52	NA	NA	NA	-6.34676	1.2399	5.45e-07	0.000382	540	7.26438	female unique
	G40-G47	A30-A49	NA	NA	NA	-6.58145	1.19499	1.2e-07	0.000384	201	4.43014	common
	G50-G59	J95-J99	NA	NA	NA	-7.3526	1.06938	5.56e-10	0.000385	323	5.88767	common
	K20-K31	J95-J99	NA	NA	NA	-13.2181	0.594112	2.93e-36	0.000389	1113	5.49041	common
	C76-C80	J09-J18	NA	NA	NA	-16.5887	0.472569	3.93e-58	0.000394	665	0.99726	common
	M05-M14	J95-J99	NA	NA	NA	-9.79617	0.800026	4.21e-19	0.000395	483	4.24384	common
	E10-E14	J09-J18	NA	NA	NA	-11.771	0.664258	2.2e-28	0.000402	696	5.30959	common
	I80-I89	M15-M19	J09-J18	NA	NA	-4.31545	1.80368	0.0255796	0.000416	129	9.89863	common
	M50-M54	J95-J99	NA	NA	NA	-8.11728	0.958934	1.48e-12	0.000416	453	5.15342	common
	J40-J47	E70-E90	J95-J99	NA	NA	-6.25018	1.24487	1e-06	0.000418	223	7.53699	female unique
	J40-J47	J95-J99	NA	NA	NA	-13.6288	0.569268	1.16e-38	0.000427	1196	4.76849	common
	M70-M79	A30-A49	NA	NA	NA	-9.83176	0.787631	2.97e-19	0.000433	419	4.29863	common
	M45-M49	A30-A49	NA	NA	NA	-7.73929	0.999938	2.99e-11	0.000436	226	3.40959	common
	K20-K31	F10-F19	J95-J99	NA	NA	-4.79946	1.60897	0.00290505	0.000443	101	7.8	common
	M80-M85	A30-A49	NA	NA	NA	-8.27061	0.931697	4.2e-13	0.00045	269	2.61644	common
	K50-K52	J95-J99	NA	NA	NA	-9.86086	0.779251	2.23e-19	0.00046	479	5.63562	common
	K50-K52	J09-J18	NA	NA	NA	-11.6433	0.658773	9.85e-28	0.000466	732	5.81781	common
	K55-K64	J95-J99	NA	NA	NA	-14.6869	0.521598	3.48e-45	0.000471	1157	5.15616	common
	F30-F39	J09-J18	NA	NA	NA	-9.07002	0.843979	4.07e-16	0.000474	572	3.7863	common
	K80-K87	J09-J18	NA	NA	NA	-11.0029	0.695683	1.43e-24	0.000474	637	4.65753	common
	M65-M68	N17-N19	NA	NA	NA	-4.91781	1.5519	0.00164974	0.000485	256	6.83973	female unique
	J40-J47	D50-D53	J95-J99	NA	NA	-4.27184	1.78637	0.0307282	0.000485131	73	8.60822	female unique
	K40-K46	E70-E90	J95-J99	NA	NA	-5.06138	1.50506	0.000809	0.000492	126	9.29589	common
	D37-D48	J09-J18	NA	NA	NA	-8.41584	0.904729	1.25e-13	0.000493	203	2.94795	common
	K00-K14	E70-E90	N17-N19	NA	NA	-4.34746	1.7518	0.0222286	0.000493	77	10.6849	female unique
	H25-H28	A30-A49	NA	NA	NA	-9.81185	0.775491	3.61e-19	0.000496	301	4.29589	common
	I80-I89	J95-J99	NA	NA	NA	-10.3934	0.732104	9.96e-22	0.000496	571	5.82466	common
	K20-K31	C15-C26	N17-N19	NA	NA	-6.51592	1.16662	1.84e-07	0.0005	69	5.89041	common
	K20-K31	C76-C80	N17-N19	NA	NA	-8.20759	0.924372	7.06e-13	0.000507	109	6.13699	common
	E10-E14	I30-I52	N17-N19	NA	NA	-5.35334	1.41659	0.000181	0.000509	174	9.07671	common
	I80-I89	E70-E90	N17-N19	NA	NA	-6.54215	1.15783	1.55e-07	0.000513	206	8.82055	common
	K20-K31	G90-G99	NA	NA	NA	-8.60314	0.879369	2.54e-14	0.000518	603	5.64932	common
	I80-I89	N17-N19	NA	NA	NA	-12.5517	0.60173	1.62e-32	0.000525	987	6.32603	common
	M20-M25	I60-I69	NA	NA	NA	-7.0723	1.06727	4.22e-09	0.000527	559	5.74521	female unique
	K00-K14	I60-I69	NA	NA	NA	-5.22147	1.44538	0.000359	0.000528	230	6.19452	female unique
	K55-K64	H25-H28	A30-A49	NA	NA	-6.16026	1.22169	1.74e-06	0.000539	79	8.73699	female unique
	K55-K64	A30-A49	NA	NA	NA	-15.7216	0.476812	4.94e-52	0.000555	1001	4.07123	common
	K80-K87	I60-I69	NA	NA	NA	-5.32928	1.40464	0.000205	0.000561	332	6.40959	female unique
	E70-E90	J95-J99	NA	NA	NA	-14.2284	0.525757	2.68e-42	0.000564	950	3.49863	common
	G50-G59	I60-I69	NA	NA	NA	-5.05581	1.47924	0.000832	0.000565	319	5.75068	female unique
	K00-K14	I95-I99	NA	NA	NA	-5.72927	1.30449	2.26e-05	0.000568	252	4.7411	common
	D37-D48	J95-J99	NA	NA	NA	-6.8669	1.08685	1.76e-08	0.000574	131	2.47397	common
	I80-I89	I70-I79	NA	NA	NA	-4.61398	1.6138	0.00686174	0.000584	550	6.04384	common
	E10-E14	C76-C80	N17-N19	NA	NA	-5.49232	1.35522	8.5e-05	0.000585	49	5.54247	common
	H30-H36	A30-A49	NA	NA	NA	-5.80451	1.28238	1.47e-05	0.000585	110	4.59589	common
	I10-I15	C76-C80	J09-J18	NA	NA	-10.4576	0.711298	5.08e-22	0.000588	164	5.33014	common
	I80-I89	J09-J18	NA	NA	NA	-13.1569	0.565008	6.59e-36	0.000591	879	5.86027	common
	K40-K46	F30-F39	J95-J99	NA	NA	-4.35304	1.70519	0.0217241	0.000598	65	8.21644	common
	C76-C80	J95-J99	NA	NA	NA	-14.5121	0.509916	4.49e-44	0.000611	376	1.06712	female unique
	I10-I15	E70-E90	N17-N19	NA	NA	-9.79395	0.755389	4.31e-19	0.000612	744	8.64384	common
	K55-K64	J09-J18	NA	NA	NA	-18.2069	0.405932	2.19e-70	0.000617	1711	5.09315	common
	F10-F19	J95-J99	NA	NA	NA	-9.41919	0.783778	1.6e-17	0.000622	410	2.50685	common
	M45-M49	J09-J18	NA	NA	NA	-9.81504	0.750486	3.5e-19	0.000632	450	3.53288	common
	K20-K31	F30-F39	J09-J18	NA	NA	-4.9499	1.48742	0.00141079	0.000635	123	8.36164	common
	M45-M49	J95-J99	NA	NA	NA	-8.4849	0.867544	6.97e-14	0.000636	287	3.90685	common
	G50-G59	J09-J18	NA	NA	NA	-9.2424	0.795871	8.34e-17	0.000639	511	5.93973	common
	K20-K31	A30-A49	NA	NA	NA	-15.5087	0.474124	1.38e-50	0.000641	850	4.54932	common
	K55-K64	I60-I69	J09-J18	NA	NA	-4.52885	1.62169	0.0100642	0.000646	81	8.92055	common
	G40-G47	N17-N19	NA	NA	NA	-6.68173	1.09877	6.17e-08	0.000648	463	5.67123	common
	F10-F19	I95-I99	NA	NA	NA	-7.15171	1.02533	2.4e-09	0.000654	275	2.56986	common
	M20-M25	A30-A49	NA	NA	NA	-9.41318	0.778777	1.69e-17	0.000655	428	6.23836	common
	K20-K31	E70-E90	N17-N19	NA	NA	-7.91312	0.926213	7.63e-12	0.000656	442	9.80822	common
	C76-C80	I95-I99	NA	NA	NA	-11.0857	0.660353	5.69e-25	0.000662	343	1.30685	common
	E10-E14	A30-A49	NA	NA	NA	-10.6688	0.685885	5.4e-23	0.000664	409	4.12603	common
	J40-J47	H25-H28	N17-N19	NA	NA	-5.51293	1.3229	7.59e-05	0.00068	146	9.08767	female unique
	K55-K64	H25-H28	N17-N19	NA	NA	-5.41138	1.34611	0.000132	0.000686	189	8.95342	female unique
	K50-K52	I26-I28	NA	NA	NA	-6.20529	1.17361	1.32e-06	0.000687	282	5.4137	common
	C15-C26	J95-J99	NA	NA	NA	-7.61544	0.955707	7.73e-11	0.00069	200	1.17671	common
	M20-M25	K55-K64	N17-N19	NA	NA	-4.84046	1.50312	0.00239261	0.000692	200	9.81096	female unique
	M70-M79	I30-I52	N17-N19	NA	NA	-5.16277	1.40926	0.000483	0.000692	122	9.86301	female unique
	I10-I15	H25-H28	A30-A49	NA	NA	-6.37086	1.14027	4.69e-07	0.0007	104	8.8274	common
	K50-K52	I60-I69	NA	NA	NA	-6.89367	1.05305	1.46e-08	0.000704	409	5.92603	common
	M20-M25	J09-J18	NA	NA	NA	-11.259	0.644525	8.14e-26	0.000705	853	6.08219	female unique
	M15-M19	C76-C80	J09-J18	NA	NA	-7.00062	1.03504	6.98e-09	0.000713	74	5.97123	common
	C51-C58	N17-N19	NA	NA	NA	-8.83228	0.819347	3.43e-15	0.00072	235	3.19452	female unique
	D10-D36	C15-C26	N17-N19	NA	NA	-4.73134	1.52941	0.00399693	0.00072	47	7.67945	female unique
	H25-H28	J95-J99	NA	NA	NA	-8.63686	0.837777	1.89e-14	0.00072	368	3.54658	common
	M50-M54	A30-A49	NA	NA	NA	-8.36606	0.861494	1.9e-13	0.000741	359	4.28493	common
	K20-K31	C15-C26	E70-E90	NA	NA	-6.19959	1.16063	1.37e-06	0.00075	121	5.8137	common
	G50-G59	N17-N19	NA	NA	NA	-7.64228	0.940897	6.32e-11	0.000754	602	6.6589	common
	I80-I89	I60-I69	NA	NA	NA	-8.69796	0.824476	1.11e-14	0.000768	575	5.90685	female unique
	J40-J47	G90-G99	NA	NA	NA	-7.25884	0.988032	1.1e-09	0.000768	411	5.01918	common
	E00-E07	J09-J18	NA	NA	NA	-11.4091	0.628276	1.48e-26	0.000771	681	4.34521	female unique
	I10-I15	L80-L99	N17-N19	NA	NA	-5.6747	1.26184	3.07e-05	0.000777	168	9.36301	female unique
	I80-I89	M70-M79	J09-J18	NA	NA	-4.22675	1.69386	0.0371764	0.000777	96	9.95068	common
	I10-I15	J09-J18	NA	NA	NA	-19.7786	0.361455	2.24e-83	0.000786	2055	4.88493	common
	I10-I15	J95-J99	NA	NA	NA	-16.3393	0.437225	2.41e-56	0.00079	1398	4.88904	common
	M50-M54	J90-J94	NA	NA	NA	-8.54705	0.835282	4.11e-14	0.000793	333	4.18904	common
	D37-D48	A30-A49	NA	NA	NA	-6.45516	1.10588	2.74e-07	0.000794	140	2.39726	common
	E10-E14	J95-J99	NA	NA	NA	-9.05335	0.788389	4.73e-16	0.000795	398	5.43014	common
	I10-I15	M70-M79	N17-N19	NA	NA	-6.88631	1.03539	1.54e-08	0.000801	330	9.28767	common
	G50-G59	B95-B98	NA	NA	NA	-5.89076	1.2098	8.88e-06	0.000803	687	5.46301	common
	M70-M79	J95-J99	NA	NA	NA	-10.094	0.706046	2.16e-20	0.000803	570	5.19726	common
	M50-M54	I60-I69	NA	NA	NA	-6.22496	1.1442	1.17e-06	0.000807	404	5.38082	common
	M70-M79	J09-J18	NA	NA	NA	-12.4102	0.573357	9.51e-32	0.000812	840	5.33973	common
	N80-N98	D60-D64	A30-A49	NA	NA	-5.29334	1.34334	0.000247	0.000816	97	11.2849	female unique
	M05-M14	A30-A49	NA	NA	NA	-10.5499	0.673981	1.92e-22	0.000817	425	3.77808	common
	J40-J47	K70-K77	NA	NA	NA	-7.02207	1.01229	6.01e-09	0.000818	557	5.01096	common
	I80-I89	K40-K46	J09-J18	NA	NA	-4.16212	1.70727	0.0487143	0.00082	99	10.2575	female unique
	C15-C26	A30-A49	NA	NA	NA	-10.5085	0.67607	2.98e-22	0.000821	300	0.556164	common
	C50-C50	I30-I52	NA	NA	NA	-9.87178	0.718958	2e-19	0.000827	812	5.89726	female unique
	N20-N23	J09-J18	NA	NA	NA	-5.26907	1.34396	0.00028	0.000841	133	6.24658	common
	C51-C58	E70-E90	NA	NA	NA	-10.219	0.690801	6.03e-21	0.000859	491	2.66301	female unique
	E10-E14	G90-G99	NA	NA	NA	-5.84554	1.20729	1.16e-05	0.000861	248	5.82603	common
	K20-K31	J09-J18	NA	NA	NA	-17.0547	0.413356	1.52e-61	0.000868	1652	5.51781	common
	H30-H36	J95-J99	NA	NA	NA	-4.40938	1.5971	0.0170842	0.000874	112	3.8589	common
	K20-K31	M45-M49	N17-N19	NA	NA	-4.78085	1.47275	0.00316639	0.000875	167	9.71507	female unique
	I80-I89	M15-M19	N17-N19	NA	NA	-4.92192	1.42926	0.00161714	0.000881	155	10.5123	common
	I10-I15	N30-N39	J09-J18	NA	NA	-8.73601	0.804623	7.99e-15	0.000886	274	7.95342	common
	I10-I15	H25-H28	N17-N19	NA	NA	-6.70055	1.04748	5.44e-08	0.000895	337	9.09863	common
	M15-M19	J09-J18	NA	NA	NA	-14.5305	0.483063	3.44e-44	0.000895	1215	4.69315	common
	N80-N98	M50-M54	J95-J99	NA	NA	-4.64256	1.5113	0.00601868	0.000897	95	13.0877	female unique
	K00-K14	N17-N19	NA	NA	NA	-8.34795	0.839726	2.21e-13	0.000903	431	5.9863	common
	E10-E14	D50-D53	N17-N19	NA	NA	-4.39616	1.59342	0.0180813	0.000907	150	9.41781	female unique
	K55-K64	E70-E90	J95-J99	NA	NA	-7.33024	0.954972	6.56e-10	0.000912	223	8.50959	female unique
	K80-K87	G90-G99	NA	NA	NA	-5.78554	1.20985	1.64e-05	0.000912	220	4.92192	female unique
	D60-D64	A30-A49	NA	NA	NA	-12.5662	0.556461	1.35e-32	0.000919	487	1.74521	common
	C76-C80	A30-A49	NA	NA	NA	-16.6426	0.419664	1.6e-58	0.000926	768	0.424658	common
	J30-J39	A30-A49	NA	NA	NA	-6.27957	1.11224	8.33e-07	0.000926	171	5.72603	common
	I10-I15	L80-L99	I95-I99	NA	NA	-4.54418	1.53652	0.00939188	0.000928	86	8.51507	female unique
	K40-K46	A30-A49	NA	NA	NA	-11.1515	0.626067	2.73e-25	0.000929	497	4.47397	common
	L00-L08	N17-N19	NA	NA	NA	-8.87037	0.785734	2.45e-15	0.00094	411	4.49863	common
	E00-E07	A30-A49	NA	NA	NA	-9.30273	0.74899	4.77e-17	0.000942	374	3.07534	common
	H00-H06	N17-N19	NA	NA	NA	-5.8149	1.19769	1.38e-05	0.000945	252	6.67808	common
	C76-C80	K90-K93	NA	NA	NA	-10.8225	0.642795	1.03e-23	0.000952	378	1.60411	female unique
	M20-M25	J95-J99	NA	NA	NA	-9.55872	0.72741	4.23e-18	0.000956	520	5.87397	female unique
	M45-M49	N17-N19	NA	NA	NA	-9.10748	0.763075	2.89e-16	0.000959	629	4.61096	common
	J40-J47	A30-A49	NA	NA	NA	-14.0824	0.492836	2.13e-41	0.000968	691	4.04932	common
	E00-E07	I60-I69	NA	NA	NA	-6.48377	1.06845	2.27e-07	0.00098	433	5.14795	female unique
	N30-N39	M15-M19	N17-N19	NA	NA	-5.4628	1.26739	9.97e-05	0.000984	201	11.0137	female unique
	E00-E07	J95-J99	NA	NA	NA	-9.25955	0.747691	7.12e-17	0.000985	456	4.20137	female unique
	J40-J47	M05-M14	N17-N19	NA	NA	-5.76298	1.20079	1.86e-05	0.000988	191	9.27397	female unique
	M20-M25	I30-I52	N17-N19	NA	NA	-4.37271	1.57945	0.0199902	0.00100128	108	9.04932	female unique
	K50-K52	A30-A49	NA	NA	NA	-10.9943	0.626574	1.57e-24	0.0010192	422	5.23836	common
	K20-K31	J20-J22	J09-J18	NA	NA	-5.26025	1.30944	0.000293	0.00101995	126	8.03014	common
	K50-K52	E70-E90	J95-J99	NA	NA	-5.13202	1.34171	0.000566	0.00102232	97	8.6137	female unique
	L80-L99	N17-N19	NA	NA	NA	-9.87416	0.697181	1.96e-19	0.00102397	555	5.98904	female unique
	M70-M79	N17-N19	NA	NA	NA	-11.8297	0.58055	1.1e-28	0.00104086	992	5.84932	common
	C15-C26	N17-N19	NA	NA	NA	-12.0203	0.570328	1.12e-29	0.00105361	286	1.33288	common
	I30-I52	N17-N19	NA	NA	NA	-13.9889	0.489771	7.93e-41	0.00105804	1194	3.95479	common
	C15-C26	J90-J94	NA	NA	NA	-8.6641	0.789264	1.5e-14	0.00107196	263	0.810959	common
	N70-N77	J95-J99	NA	NA	NA	-5.01726	1.36261	0.00100687	0.00107379	165	7.80822	female unique
	K80-K87	N17-N19	NA	NA	NA	-10.3384	0.658951	1.76e-21	0.00109997	780	6.50274	common
	C50-C50	I26-I28	NA	NA	NA	-8.11863	0.838938	1.46e-12	0.00110156	286	4.1726	female unique
	N30-N39	M70-M79	N17-N19	NA	NA	-4.65771	1.46124	0.00561476	0.00110708	138	9.66986	female unique
	J40-J47	F30-F39	J95-J99	NA	NA	-4.35557	1.56157	0.0214872	0.00111208	108	8.22466	female unique
	I10-I15	J20-J22	J09-J18	NA	NA	-6.88699	0.98675	1.53e-08	0.00111853	182	7.59315	common
	F10-F19	A30-A49	NA	NA	NA	-8.7695	0.774029	5.96e-15	0.0011274	204	2.17397	common
	C50-C50	E70-E90	NA	NA	NA	-13.5034	0.502469	6.4e-38	0.00113053	1393	6.27123	female unique
	M05-M14	J09-J18	NA	NA	NA	-12.3913	0.547157	1.2e-31	0.00113627	793	4.09589	common
	K00-K14	J95-J99	NA	NA	NA	-7.09501	0.954442	3.6e-09	0.00114566	268	5.84795	common
	M20-M25	I95-I99	NA	NA	NA	-7.55649	0.895832	1.21e-10	0.00114845	584	6.0589	common
	C50-C50	I95-I99	NA	NA	NA	-7.31	0.925666	7.6e-10	0.00115158	361	5.48493	female unique
	M05-M14	N17-N19	NA	NA	NA	-11.2766	0.599718	6.67e-26	0.00115602	1005	4.58356	female unique
	K55-K64	G90-G99	NA	NA	NA	-9.03016	0.748629	5.83e-16	0.00115896	621	5.32877	common
	K20-K31	K80-K87	N17-N19	NA	NA	-5.61938	1.20295	4.2e-05	0.00115943	188	8.87123	common
	C51-C58	J09-J18	NA	NA	NA	-9.02796	0.748438	5.94e-16	0.00116287	161	2.52877	female unique
	K55-K64	I30-I52	N17-N19	NA	NA	-7.32042	0.922843	7.04e-10	0.00116434	238	8.26575	female unique
	I80-I89	G90-G99	NA	NA	NA	-7.04436	0.958914	5.14e-09	0.00116511	344	6.18904	common
	I10-I15	H25-H28	J09-J18	NA	NA	-6.61217	1.02147	9.79e-08	0.00116609	186	9.06438	common
	G50-G59	A30-A49	NA	NA	NA	-8.36967	0.806551	1.85e-13	0.00117021	275	5.76164	common
	C15-C26	C76-C80	N17-N19	NA	NA	-8.13227	0.828731	1.31e-12	0.00118329	77	1.53973	common
	I10-I15	M45-M49	N17-N19	NA	NA	-5.33131	1.26305	0.000203	0.00119009	245	9.09041	common
	E70-E90	N17-N19	NA	NA	NA	-16.7826	0.401017	1.54e-59	0.00119441	1929	4.39726	common
	I10-I15	K40-K46	N17-N19	NA	NA	-6.91076	0.971981	1.3e-08	0.00121001	393	9.13699	female unique
	E10-E14	D60-D64	A30-A49	NA	NA	-5.39775	1.24206	0.000142	0.00122558	75	7.79726	common
	M40-M43	N17-N19	NA	NA	NA	-5.04979	1.32746	0.000857	0.00122673	180	4.15616	female unique
	M05-M14	I95-I99	NA	NA	NA	-8.3519	0.802367	2.14e-13	0.00122932	469	3.99726	common
	I10-I15	I95-I99	NA	NA	NA	-13.7527	0.486973	2.12e-39	0.00123436	1450	4.93425	common
	K20-K31	H25-H28	J09-J18	NA	NA	-4.83468	1.38223	0.00245644	0.00125248	120	9.88767	common
	M15-M19	J95-J99	NA	NA	NA	-11.2099	0.596126	1.42e-25	0.00125263	793	4.49315	common
	H30-H36	I95-I99	NA	NA	NA	-4.58577	1.45661	0.00780252	0.00125617	143	4.70959	common
	K50-K52	N17-N19	NA	NA	NA	-11.9043	0.559795	4.53e-29	0.00127607	838	6.6	common
	K50-K52	H25-H28	N17-N19	NA	NA	-4.56916	1.45501	0.00839299	0.00129638	86	8.73151	female unique
	M70-M79	I95-I99	NA	NA	NA	-8.64896	0.768655	1.71e-14	0.00129652	536	5.30685	common
	I10-I15	H25-H28	A00-A09	NA	NA	-4.37266	1.51782	0.0199902	0.00131106	180	8.46712	common
	M50-M54	J09-J18	NA	NA	NA	-11.7146	0.566334	4.28e-28	0.00131439	726	5.22329	common
	H25-H28	I95-I99	NA	NA	NA	-7.39481	0.896385	4.08e-10	0.00132202	373	4.16438	common
	D37-D48	I95-I99	NA	NA	NA	-4.86695	1.36136	0.00210799	0.00132589	117	2.29041	common
	C76-C80	J20-J22	NA	NA	NA	-12.1234	0.54504	3.23e-30	0.0013499	479	0.887671	common
	I10-I15	N17-N19	NA	NA	NA	-20.0366	0.329775	1.3e-85	0.00135012	3425	5.71781	common
	I10-I15	I30-I52	N17-N19	NA	NA	-9.05643	0.729267	4.6e-16	0.00135418	440	8.60137	common
	D10-D36	N30-N39	J95-J99	NA	NA	-4.53103	1.45699	0.00996672	0.0013581	81	11.3781	female unique
	M15-M19	C76-C80	J95-J99	NA	NA	-5.13947	1.28439	0.000544	0.0013589	42	5.92329	female unique
	D10-D36	K70-K77	NA	NA	NA	-6.0933	1.0819	2.61e-06	0.00137086	583	7.81096	common
	G50-G59	K55-K64	J95-J99	NA	NA	-4.15869	1.58455	0.0493555	0.0013745	78	11.2548	female unique
	E10-E14	H25-H28	N17-N19	NA	NA	-4.8591	1.35544	0.00219092	0.00137922	186	10.9685	common
	I80-I89	E70-E90	J95-J99	NA	NA	-5.23318	1.25652	0.000338	0.00139398	102	8.00411	common
	E10-E14	I60-I69	NA	NA	NA	-7.89687	0.832243	8.68e-12	0.00139884	453	5.59726	common
	E65-E68	A30-A49	NA	NA	NA	-6.50352	1.00869	2e-07	0.00141586	236	3.25205	common
	I30-I52	I95-I99	NA	NA	NA	-10.5208	0.623309	2.61e-22	0.00141914	716	3.33014	common
	I20-I25	J95-J99	NA	NA	NA	-9.26805	0.707113	6.58e-17	0.00142503	560	4.99315	common
	I20-I25	A30-A49	NA	NA	NA	-10.1443	0.645685	1.29e-20	0.00143007	365	4.19452	common
	D50-D53	C76-C80	NA	NA	NA	-7.27479	0.900161	9.85e-10	0.00143228	269	1.43288	common
	J40-J47	J09-J18	NA	NA	NA	-16.3187	0.401187	3.37e-56	0.00143462	1627	5.13425	common
	I10-I15	G40-G47	N17-N19	NA	NA	-4.84637	1.34877	0.00232741	0.00144936	172	8.66027	common
	I10-I15	K70-K77	NA	NA	NA	-9.31571	0.701675	4.22e-17	0.0014494	1051	4.60548	common
	C50-C50	K55-K64	J90-J94	NA	NA	-5.84113	1.11815	1.19e-05	0.00145718	63	8.30411	female unique
	I80-I89	A30-A49	NA	NA	NA	-11.8621	0.550222	7.48e-29	0.00146367	502	5.24658	common
	K50-K52	G90-G99	NA	NA	NA	-6.16501	1.05831	1.69e-06	0.00146705	266	6.28219	common
	K20-K31	I30-I52	I95-I99	NA	NA	-4.57616	1.42476	0.00813633	0.00147375	141	9.19726	common
	M70-M79	J90-J94	NA	NA	NA	-9.68967	0.672776	1.19e-18	0.00147518	401	4.87945	common
	K40-K46	J09-J18	NA	NA	NA	-13.9469	0.467216	1.43e-40	0.00147927	962	5.59589	common
	K20-K31	I95-I99	NA	NA	NA	-11.0032	0.592142	1.42e-24	0.00148039	1098	5.42603	common
	M20-M25	N17-N19	NA	NA	NA	-10.4874	0.620254	3.72e-22	0.00149614	993	6.74247	common
	I80-I89	I95-I99	NA	NA	NA	-9.22227	0.703379	1e-16	0.00152349	650	5.08493	common
	I10-I15	K55-K64	N17-N19	NA	NA	-9.02382	0.718553	6.17e-16	0.00152755	639	8.85205	common
	C15-C26	E70-E90	NA	NA	NA	-12.8745	0.503545	2.63e-34	0.00152942	602	0.684932	common
	I10-I15	F30-F39	N17-N19	NA	NA	-5.48505	1.18134	8.84e-05	0.00153425	205	8.65753	female unique
	J40-J47	K65-K67	NA	NA	NA	-4.90834	1.32014	0.00172678	0.00153427	447	4.93699	common
	C51-C58	A30-A49	NA	NA	NA	-9.03328	0.716153	5.67e-16	0.00155045	190	1.8137	female unique
	C76-C80	J90-J94	NA	NA	NA	-17.3192	0.37318	1.6e-63	0.00155982	705	1.07671	female unique
	C50-C50	C76-C80	J90-J94	NA	NA	-8.72591	0.7394	8.73e-15	0.00157747	157	6.85479	female unique
	E00-E07	N17-N19	NA	NA	NA	-10.7733	0.598211	1.76e-23	0.0015889	978	5.55479	female unique
	K55-K64	I95-I99	NA	NA	NA	-12.2196	0.527112	9.99e-31	0.00159468	1159	4.47397	common
	M15-M19	N17-N19	NA	NA	NA	-13.783	0.466744	1.39e-39	0.00160739	1638	5.18219	common
	F30-F39	N17-N19	NA	NA	NA	-9.57962	0.671213	3.46e-18	0.00161251	620	4.33699	female unique
	G50-G59	I95-I99	NA	NA	NA	-5.77947	1.11181	1.69e-05	0.00161945	362	5.88904	common
	K20-K31	C76-C80	I95-I99	NA	NA	-5.16332	1.24253	0.000482	0.00163584	53	8.65479	common
	C51-C58	K90-K93	NA	NA	NA	-6.13208	1.04525	2.06e-06	0.00164572	176	3.20548	female unique
	M15-M19	A30-A49	NA	NA	NA	-12.637	0.506507	5.51e-33	0.00166035	604	4.2863	female unique
	D00-D09	A30-A49	NA	NA	NA	-5.66527	1.12655	3.24e-05	0.00169136	106	3.41233	female unique
	H25-H28	J09-J18	NA	NA	NA	-10.7322	0.594206	2.74e-23	0.0017	577	3.8274	common
	M15-M19	I60-I69	NA	NA	NA	-9.72986	0.655407	8.06e-19	0.00170018	818	4.54521	female unique
	K55-K64	J90-J94	NA	NA	NA	-15.4744	0.411997	2.36e-50	0.00170296	1009	4.22466	common
	K55-K64	N17-N19	NA	NA	NA	-17.5329	0.363454	3.83e-65	0.00170805	2113	5.39452	common
	M45-M49	I95-I99	NA	NA	NA	-6.95624	0.914959	9.49e-09	0.0017213	328	3.97123	common
	I10-I15	E65-E68	J90-J94	NA	NA	-4.67701	1.36084	0.00513484	0.00172134	80	8.89178	female unique
	C51-C58	I30-I52	NA	NA	NA	-6.99778	0.909174	7.12e-09	0.00172556	221	3.44658	female unique
	N30-N39	I95-I99	NA	NA	NA	-8.69274	0.731494	1.17e-14	0.00173164	660	4.84932	common
	G40-G47	I95-I99	NA	NA	NA	-5.18223	1.22665	0.000438	0.00173492	275	5.0137	common
	I20-I25	J09-J18	NA	NA	NA	-11.7895	0.539084	1.77e-28	0.00173711	773	5.20822	common
	J40-J47	J90-J94	NA	NA	NA	-12.5589	0.506046	1.48e-32	0.00173734	685	4.28219	common
	I10-I15	I60-I69	NA	NA	NA	-13.1058	0.484573	1.29e-35	0.00174549	1472	5.15342	common
	K00-K14	K90-K93	NA	NA	NA	-4.23896	1.49759	0.035323	0.00174984	430	5.4274	common
	K20-K31	N17-N19	NA	NA	NA	-16.861	0.37613	4.1e-60	0.0017609	2002	6.28082	common
	E10-E14	I30-I52	NA	NA	NA	-10.1811	0.622612	8.89e-21	0.00176625	1132	5.01096	common
	I80-I89	J90-J94	NA	NA	NA	-11.8475	0.53487	8.91e-29	0.00176983	558	5.80137	common
	M15-M19	I95-I99	NA	NA	NA	-9.79692	0.646006	4.18e-19	0.00178404	854	4.93151	common
	H30-H36	N17-N19	NA	NA	NA	-6.81443	0.928255	2.52e-08	0.00179003	327	4.41918	common
	C15-C26	I95-I99	NA	NA	NA	-8.31402	0.759637	2.93e-13	0.00180782	183	0.813699	common
	N80-N98	M50-M54	I30-I52	NA	NA	-4.68846	1.34434	0.00486677	0.00183104	218	12.0959	female unique
	N80-N98	F30-F39	N17-N19	NA	NA	-4.62081	1.36293	0.00665103	0.00184026	142	11.2219	female unique
	J40-J47	D60-D64	A00-A09	NA	NA	-4.51148	1.39517	0.0108733	0.00184687	108	9.83288	female unique
	K40-K46	N17-N19	NA	NA	NA	-12.1539	0.517174	2.23e-30	0.00186281	1173	6.10411	common
	I80-I89	I30-I52	NA	NA	NA	-11.0195	0.569714	1.19e-24	0.00187722	1692	6.42466	common
	I10-I15	D70-D77	NA	NA	NA	-9.72808	0.644517	8.2e-19	0.0018924	841	2.98082	common
	I10-I15	I80-I89	E70-E90	NA	NA	-6.35259	0.985945	5.25e-07	0.00190494	415	7.16712	common
	C50-C50	N30-N39	J09-J18	NA	NA	-5.64656	1.10834	3.6e-05	0.00191445	57	9.80274	female unique
	N80-N98	F30-F39	A30-A49	NA	NA	-4.1992	1.48656	0.0416781	0.00194524	48	11.0247	female unique
	K80-K87	A30-A49	NA	NA	NA	-11.3259	0.55064	3.82e-26	0.00195671	426	2.60548	common
	I10-I15	I26-I28	NA	NA	NA	-12.4593	0.499544	5.15e-32	0.00198136	901	4.30137	common
	K40-K46	I30-I52	NA	NA	NA	-11.0774	0.561768	6.24e-25	0.00198342	1799	5.6137	common
	E10-E14	J90-J94	NA	NA	NA	-10.2923	0.60366	2.84e-21	0.00200308	340	5.22877	common
	K55-K64	F30-F39	J09-J18	NA	NA	-5.48299	1.13159	8.94e-05	0.00202027	133	7.7726	common
	I20-I25	N17-N19	NA	NA	NA	-11.8664	0.522426	7.11e-29	0.00203079	1173	6.08767	common
	N80-N98	F30-F39	J09-J18	NA	NA	-5.23433	1.18267	0.000336	0.00204888	134	11.9836	female unique
	N30-N39	K65-K67	NA	NA	NA	-4.98792	1.24016	0.00116755	0.00205846	456	4.27671	common
	I10-I15	D60-D64	A30-A49	NA	NA	-9.24626	0.668947	8.05e-17	0.00205956	178	6.67945	common
	I10-I15	E65-E68	A30-A49	NA	NA	-6.04515	1.02299	3.51e-06	0.00206192	108	8.19589	common
	I10-I15	D50-D53	N17-N19	NA	NA	-6.14822	1.00583	1.87e-06	0.00206198	245	8.90411	female unique
	J40-J47	E70-E90	A00-A09	NA	NA	-5.63486	1.09707	3.85e-05	0.0020666	264	9.51644	female unique
	E65-E68	N17-N19	NA	NA	NA	-7.57878	0.814274	1.02e-10	0.00208873	598	3.67534	common
	E10-E14	N17-N19	NA	NA	NA	-12.2472	0.503481	7.11e-31	0.00209909	1250	5.81233	common
	H25-H28	N17-N19	NA	NA	NA	-10.7133	0.575508	3.36e-23	0.00210043	851	4.58904	common
	C15-C26	K65-K67	NA	NA	NA	-5.33721	1.15377	0.000197	0.00211669	282	0.805479	common
	N80-N98	K80-K87	D60-D64	NA	NA	-4.49887	1.36736	0.0114909	0.00213018	153	11.789	female unique
	K55-K64	I26-I28	NA	NA	NA	-12.2701	0.501204	5.37e-31	0.00213391	691	4.08493	common
	C15-C26	K90-K93	NA	NA	NA	-9.44412	0.650855	1.26e-17	0.00214043	421	1.03836	common
	E10-E14	L80-L99	NA	NA	NA	-7.4003	0.828035	3.92e-10	0.00218159	613	5.19726	common
	K40-K46	I95-I99	NA	NA	NA	-8.3681	0.732133	1.87e-13	0.00218409	632	5.03699	common
	J40-J47	E70-E90	NA	NA	NA	-15.0307	0.406264	2.08e-47	0.00222849	3454	4.69863	female unique
	C76-C80	I26-I28	NA	NA	NA	-14.2239	0.429157	2.86e-42	0.00223327	414	0.636986	common
	K20-K31	J90-J94	NA	NA	NA	-14.5512	0.419387	2.54e-44	0.00223707	943	4.39178	common
	K55-K64	E70-E90	N17-N19	NA	NA	-9.0121	0.675794	6.86e-16	0.00226467	436	8.81096	female unique
	C50-C50	J90-J94	NA	NA	NA	-15.1617	0.401344	2.86e-48	0.0022766	503	5.33425	female unique
	M70-M79	I26-I28	NA	NA	NA	-7.91792	0.768457	7.35e-12	0.00227771	346	5.11781	common
	C50-C50	A30-A49	NA	NA	NA	-10.0783	0.603712	2.53e-20	0.00227811	769	0.463014	female unique
	H30-H36	J90-J94	NA	NA	NA	-5.77839	1.052	1.7e-05	0.00229082	108	3.64521	common
	N30-N39	I30-I52	NA	NA	NA	-12.3169	0.492287	3.02e-31	0.00232636	1688	5.68219	female unique
	K80-K87	J90-J94	NA	NA	NA	-10.171	0.59595	9.85e-21	0.00233119	402	3.33836	female unique
	K80-K87	I95-I99	NA	NA	NA	-6.95688	0.871003	9.45e-09	0.00233565	367	4.80548	common
	D00-D09	N17-N19	NA	NA	NA	-4.92336	1.22083	0.00160612	0.00245266	175	6.09041	female unique
	K20-K31	D37-D48	N17-N19	NA	NA	-4.71207	1.27357	0.00437225	0.00247597	36	8.20137	common
	K55-K64	I30-I52	I95-I99	NA	NA	-5.17207	1.16019	0.000461	0.00247732	130	6.28219	female unique
	K20-K31	H25-H28	J95-J99	NA	NA	-4.37996	1.36964	0.0193954	0.00248129	78	10.9479	female unique
	J20-J22	J09-J18	NA	NA	NA	-12.0751	0.49666	5.8e-30	0.00248571	616	2.76712	common
	K50-K52	K70-K77	NA	NA	NA	-6.38681	0.938392	4.24e-07	0.00249533	395	5.92603	common
	N30-N39	N17-N19	NA	NA	NA	-13.2084	0.453698	3.34e-36	0.00249714	1253	6.22192	common
	K55-K64	I30-I52	NA	NA	NA	-15.8038	0.378729	1.35e-52	0.00251536	2974	5.13562	female unique
	I20-I25	I26-I28	NA	NA	NA	-7.41568	0.804794	3.5e-10	0.00255911	330	5.89315	common
	C15-C26	J20-J22	NA	NA	NA	-7.12271	0.837113	2.95e-09	0.00257345	138	1.2589	common
	K40-K46	F10-F19	N17-N19	NA	NA	-4.17628	1.42752	0.0458702	0.00257549	82	8.63151	common
	E10-E14	C76-C80	NA	NA	NA	-11.8734	0.501484	6.54e-29	0.00259457	435	3.38356	common
	M70-M79	I30-I52	NA	NA	NA	-10.6122	0.560718	9.9e-23	0.00260471	1430	5.40548	female unique
	C15-C26	B95-B98	NA	NA	NA	-7.87739	0.754726	1.01e-11	0.0026182	315	1.03288	common
	I10-I15	M15-M19	N17-N19	NA	NA	-8.30829	0.714537	3.07e-13	0.00264104	565	8.80822	common
	K20-K31	M45-M49	J09-J18	NA	NA	-4.52779	1.31112	0.0101086	0.00264126	116	8.69863	female unique
	M45-M49	J90-J94	NA	NA	NA	-8.46995	0.700816	7.91e-14	0.00264291	236	3.46712	female unique
	I20-I25	I95-I99	NA	NA	NA	-9.12307	0.650442	2.5e-16	0.0026478	684	4.34932	common
	K00-K14	I30-I52	NA	NA	NA	-7.07457	0.838067	4.15e-09	0.00266124	657	5.76712	female unique
	N70-N77	A30-A49	NA	NA	NA	-5.18683	1.14245	0.000428	0.00267002	149	5.76986	female unique
	D37-D48	J90-J94	NA	NA	NA	-7.52851	0.786207	1.5e-10	0.00268799	149	2.36438	common
	I10-I15	N30-N39	N17-N19	NA	NA	-7.61943	0.776544	7.5e-11	0.00269376	366	9.01096	female unique
	C15-C26	I26-I28	NA	NA	NA	-9.6725	0.611207	1.41e-18	0.00270705	187	0.567123	common
	J40-J47	I26-I28	NA	NA	NA	-10.2022	0.579135	7.17e-21	0.00271642	520	3.85753	common
	D37-D48	N17-N19	NA	NA	NA	-7.9777	0.740051	4.56e-12	0.00272878	197	3.87671	common
	J40-J47	C76-C80	NA	NA	NA	-14.5594	0.405297	2.26e-44	0.00273709	811	3.59726	common
	I10-I15	C76-C80	K90-K93	NA	NA	-5.70952	1.0333	2.53e-05	0.00274033	63	4.67671	female unique
	I10-I15	C76-C80	NA	NA	NA	-20.1293	0.292998	2.02e-86	0.00274536	1649	3.52329	common
	K55-K64	F30-F39	N17-N19	NA	NA	-4.74879	1.24072	0.00368352	0.00276167	151	8.53699	female unique
	F10-F19	J90-J94	NA	NA	NA	-7.88518	0.746664	9.51e-12	0.00277368	252	1.83014	common
	N20-N23	N17-N19	NA	NA	NA	-4.33687	1.35556	0.0232975	0.00279788	153	7.18082	common
	K50-K52	L80-L99	NA	NA	NA	-6.53133	0.899411	1.67e-07	0.00281061	662	5.47397	common
	M15-M19	J90-J94	NA	NA	NA	-12.3523	0.474948	1.95e-31	0.00283224	640	4.32329	common
	I10-I15	H25-H28	I95-I99	NA	NA	-4.49523	1.30434	0.0116819	0.00284182	125	8.98356	common
	K80-K87	D70-D77	NA	NA	NA	-6.68137	0.876689	6.18e-08	0.00285845	296	3.71644	common
	C15-C26	C76-C80	NA	NA	NA	-13.8445	0.422989	5.95e-40	0.0028625	1012	0.249315	common
	K20-K31	M15-M19	N17-N19	NA	NA	-6.32677	0.925534	6.19e-07	0.0028637	342	10.5795	common
	G40-G47	J09-J18	NA	NA	NA	-9.27034	0.63149	6.44e-17	0.00286805	463	4.77534	common
	M50-M54	N17-N19	NA	NA	NA	-10.2377	0.571586	4.98e-21	0.00287491	872	5.70685	common
	I10-I15	K20-K31	E70-E90	NA	NA	-8.32837	0.701875	2.6e-13	0.00289296	772	7.39315	common
	M50-M54	I95-I99	NA	NA	NA	-7.54506	0.774118	1.32e-10	0.00290663	491	5.33973	common
	I10-I15	C76-C80	B95-B98	NA	NA	-6.95368	0.837362	9.66e-09	0.00295947	115	5.29589	female unique
	K20-K31	I26-I28	NA	NA	NA	-11.0765	0.525527	6.3e-25	0.00296467	645	5.11781	common
	G50-G59	M15-M19	J09-J18	NA	NA	-4.67699	1.24282	0.00513484	0.0029895	99	8.74521	female unique
	I10-I15	J90-J94	NA	NA	NA	-18.5967	0.312494	1.66e-73	0.00299338	1259	4.21918	common
	I80-I89	E70-E90	NA	NA	NA	-13.8268	0.418536	7.6e-40	0.00306715	2880	6.01644	common
	K00-K14	J90-J94	NA	NA	NA	-6.89991	0.838395	1.4e-08	0.00307378	223	4.98082	common
	C15-C26	D60-D64	NA	NA	NA	-10.2927	0.560681	2.83e-21	0.00311686	391	0.709589	common
	K00-K14	J09-J18	NA	NA	NA	-8.57647	0.671717	3.19e-14	0.00314809	391	5.87945	common
	K80-K87	I30-I52	NA	NA	NA	-9.24262	0.622581	8.32e-17	0.0031692	996	5.91644	female unique
	K20-K31	K65-K67	NA	NA	NA	-6.64211	0.864724	8.03e-08	0.00320325	854	4.31233	common
	C76-C80	A00-A09	NA	NA	NA	-11.6169	0.492691	1.34e-27	0.00326809	524	1.08219	common
	K00-K14	E70-E90	NA	NA	NA	-8.70094	0.657078	1.09e-14	0.00328894	1234	5.63288	female unique
	K20-K31	I30-I52	NA	NA	NA	-14.8484	0.384451	3.19e-46	0.00331775	3074	5.72055	common
	E10-E14	N30-N39	N17-N19	NA	NA	-4.72653	1.20752	0.00408824	0.00332134	169	9.24932	female unique
	M20-M25	I26-I28	NA	NA	NA	-7.842	0.727362	1.34e-11	0.00333269	359	5.94521	female unique
	K50-K52	I30-I52	NA	NA	NA	-9.72708	0.586387	8.28e-19	0.00333315	1156	5.87534	common
	C50-C50	J20-J22	NA	NA	NA	-9.34088	0.610225	3.34e-17	0.00334584	417	3.51233	female unique
	L60-L75	E70-E90	NA	NA	NA	-6.71178	0.848121	5.04e-08	0.00337151	806	6.99041	female unique
	I10-I15	M05-M14	N17-N19	NA	NA	-6.1038	0.932576	2.45e-06	0.00337198	347	8.67671	female unique
	K40-K46	C76-C80	NA	NA	NA	-13.2959	0.427994	1.04e-36	0.00337763	791	3.82466	common
	N30-N39	J20-J22	NA	NA	NA	-9.13757	0.621913	2.19e-16	0.00340411	796	4.73151	female unique
	K50-K52	J90-J94	NA	NA	NA	-10.1151	0.561753	1.74e-20	0.00340602	399	5.44384	common
	E10-E14	I95-I99	NA	NA	NA	-8.64495	0.656114	1.77e-14	0.00344073	447	5.51507	common
	I80-I89	K40-K46	N17-N19	NA	NA	-4.73654	1.19641	0.00390228	0.00345882	126	10.2932	female unique
	K20-K31	I60-I69	NA	NA	NA	-9.73603	0.581353	7.59e-19	0.00348227	1016	5.95342	common
	J40-J47	D60-D64	A30-A49	NA	NA	-6.06256	0.933589	3.16e-06	0.00348272	76	7.88082	female unique
	D10-D36	N30-N39	I30-I52	NA	NA	-4.63905	1.21815	0.00611839	0.0035138	172	10.5616	female unique
	C76-C80	D60-D64	NA	NA	NA	-15.6626	0.360626	1.25e-51	0.00352343	837	0.682192	common
	K20-K31	E70-E90	A00-A09	NA	NA	-5.9023	0.95659	8.29e-06	0.00353132	345	10.6164	female unique
	M20-M25	C76-C80	NA	NA	NA	-11.7488	0.480206	2.86e-28	0.00354637	627	5.6	female unique
	N30-N39	L80-L99	NA	NA	NA	-9.38812	0.600371	2.14e-17	0.00356583	1100	4.77534	female unique
	C76-C80	B95-B98	NA	NA	NA	-14.4103	0.390583	1.97e-43	0.00359427	587	1.27397	female unique
	K55-K64	D70-D77	NA	NA	NA	-11.007	0.510641	1.36e-24	0.00362229	767	3.60822	common
	I20-I25	K70-K77	NA	NA	NA	-5.79001	0.969604	1.6e-05	0.0036464	351	5.08493	common
	I10-I15	K40-K46	E70-E90	NA	NA	-7.26679	0.772122	1.04e-09	0.00365799	547	7.37534	female unique
	K20-K31	M05-M14	A00-A09	NA	NA	-4.29321	1.30623	0.0281415	0.00366866	207	9.42192	female unique
	K55-K64	J20-J22	NA	NA	NA	-12.2818	0.45659	4.65e-31	0.00366934	1275	4.73973	common
	N80-N98	C76-C80	NA	NA	NA	-17.0654	0.328456	1.27e-61	0.00367855	1790	7.74795	female unique
	I80-I89	N10-N16	NA	NA	NA	-6.49536	0.861865	2.11e-07	0.00370482	316	4.90685	female unique
	C50-C50	C76-C80	NA	NA	NA	-14.282	0.391662	1.25e-42	0.00372122	1644	1.48767	female unique
	E00-E07	J90-J94	NA	NA	NA	-11.1492	0.501707	2.8e-25	0.00372152	421	3.51781	female unique
	K40-K46	F30-F39	J09-J18	NA	NA	-4.3485	1.28539	0.022151	0.00373682	73	7.83562	common
	H53-H54	J09-J18	NA	NA	NA	-5.49697	1.01017	8.29e-05	0.00387628	167	3.77808	common
	I10-I15	N30-N39	I95-I99	NA	NA	-5.4775	1.01354	9.21e-05	0.00388102	181	8.92329	female unique
	M70-M79	K70-K77	NA	NA	NA	-6.15827	0.900452	1.76e-06	0.00390605	438	5.97808	female unique
	K20-K31	K70-K77	NA	NA	NA	-8.80898	0.629179	4.22e-15	0.00391703	1059	5.1726	common
	K20-K31	J20-J22	NA	NA	NA	-11.4619	0.482433	8.07e-27	0.00396766	1232	5.90274	common
	I10-I15	L80-L99	NA	NA	NA	-12.285	0.449994	4.48e-31	0.00397326	2031	4.30411	common
	K20-K31	F10-F19	N17-N19	NA	NA	-5.15414	1.07219	0.000505	0.00398112	132	8.80274	common
	C51-C58	K55-K64	NA	NA	NA	-9.7749	0.565028	5.19e-19	0.00399347	722	2.82466	female unique
	N60-N64	J20-J22	NA	NA	NA	-4.60844	1.19753	0.00703886	0.00401095	193	6.85205	female unique
	E10-E14	I20-I25	NA	NA	NA	-6.36234	0.86682	4.95e-07	0.00402592	1020	4.32055	female unique
	M15-M19	C76-C80	NA	NA	NA	-16.4705	0.334732	2.78e-57	0.00403317	833	4.03836	common
	I10-I15	H25-H28	J90-J94	NA	NA	-4.97919	1.10648	0.00121893	0.00404859	103	8.97534	common
	K50-K52	E70-E90	NA	NA	NA	-11.7765	0.467664	2.06e-28	0.00405642	1988	5.84384	female unique
	K20-K31	C76-C80	NA	NA	NA	-19.3603	0.284252	8.17e-80	0.00407367	1390	4.20274	common
	K20-K31	M70-M79	N17-N19	NA	NA	-5.54185	0.992712	6.46e-05	0.0040808	214	10.426	common
	M20-M25	E70-E90	NA	NA	NA	-11.6984	0.468609	5.17e-28	0.00416109	3013	5.61096	female unique
	K80-K87	C76-C80	J90-J94	NA	NA	-7.22346	0.757979	1.43e-09	0.00418927	58	6.50411	female unique
	K20-K31	C15-C26	C76-C80	NA	NA	-8.80698	0.621008	4.29e-15	0.00421456	201	4.12055	common
	K55-K64	K65-K67	NA	NA	NA	-7.24522	0.754639	1.22e-09	0.00422167	1089	3.29315	common
	K40-K46	E70-E90	N17-N19	NA	NA	-6.44008	0.848006	3.02e-07	0.00424835	250	9.16438	common
	I10-I15	C76-C80	A00-A09	NA	NA	-6.13289	0.888946	2.05e-06	0.00428854	104	5.61233	common
	K20-K31	F10-F19	J90-J94	NA	NA	-4.24544	1.28373	0.0344045	0.00429638	64	7.80959	common
	F30-F39	A30-A49	NA	NA	NA	-8.43084	0.645762	1.1e-13	0.00432078	266	2.74658	common
	C43-C44	C76-C80	J90-J94	NA	NA	-5.05152	1.07764	0.000851	0.00432341	32	5.95753	female unique
	N80-N98	M50-M54	J09-J18	NA	NA	-5.4933	0.990138	8.46e-05	0.00434328	137	13.1123	female unique
	I80-I89	F30-F39	NA	NA	NA	-6.28601	0.864789	8.01e-07	0.00435657	1382	6.2726	common
	D37-D48	C76-C80	NA	NA	NA	-8.70659	0.624348	1.03e-14	0.00435715	272	1.51096	common
	M65-M68	E70-E90	NA	NA	NA	-5.66225	0.959975	3.3e-05	0.00435854	824	5.83151	female unique
	K55-K64	K70-K77	NA	NA	NA	-9.04645	0.600839	5.03e-16	0.00435923	939	4.81096	common
	E10-E14	B95-B98	NA	NA	NA	-8.98422	0.603768	8.83e-16	0.00440776	834	4.50548	common
	N60-N64	C76-C80	NA	NA	NA	-6.27212	0.863935	8.73e-07	0.00443291	319	5.20274	female unique
	N80-N98	C76-C80	D60-D64	NA	NA	-8.69197	0.623258	1.17e-14	0.00443895	182	8.64932	female unique
	I80-I89	D70-D77	NA	NA	NA	-8.49516	0.63735	6.39e-14	0.00445204	458	5.81507	common
	K80-K87	C76-C80	NA	NA	NA	-11.8354	0.457035	1.03e-28	0.00447517	593	3.67671	common
	M50-M54	I30-I52	N17-N19	NA	NA	-4.51725	1.19704	0.0106002	0.0044837	89	8.26301	female unique
	I10-I15	J20-J22	NA	NA	NA	-13.0674	0.413572	2.13e-35	0.0044971	1548	4.4411	common
	K50-K52	I95-I99	NA	NA	NA	-8.1293	0.663907	1.34e-12	0.00452968	492	5.28493	common
	N80-N98	K65-K67	NA	NA	NA	-5.60054	0.962323	4.66e-05	0.00456413	1064	6.58904	female unique
	M50-M54	I26-I28	NA	NA	NA	-7.32912	0.734672	6.61e-10	0.00458715	282	5.17534	common
	E00-E07	J20-J22	NA	NA	NA	-7.27364	0.739654	9.93e-10	0.00460793	515	4.30959	female unique
	N80-N98	M50-M54	J90-J94	NA	NA	-5.59325	0.960866	4.84e-05	0.00463387	79	12.7397	female unique
	L00-L08	A00-A09	NA	NA	NA	-7.26911	0.739303	1.03e-09	0.00463521	343	4.8137	common
	I10-I15	E65-E68	N17-N19	NA	NA	-6.12295	0.876303	2.18e-06	0.00467482	294	8.43562	common
	C50-C50	K55-K64	A30-A49	NA	NA	-4.85545	1.10472	0.00222866	0.00468255	64	8.64658	female unique
	I80-I89	B95-B98	NA	NA	NA	-10.3111	0.520086	2.34e-21	0.0046883	1066	4.89726	common
	N30-N39	J90-J94	NA	NA	NA	-12.2987	0.434741	3.78e-31	0.00476353	572	5.03288	common
	K40-K46	M15-M19	N17-N19	NA	NA	-4.8233	1.10544	0.00259108	0.00483492	217	9.74247	common
	I20-I25	I60-I69	NA	NA	NA	-8.38972	0.63492	1.56e-13	0.00485959	655	5.4411	common
	K40-K46	E70-E90	NA	NA	NA	-13.6882	0.388303	5.15e-39	0.00491641	3304	5.46712	common
	E65-E68	J90-J94	NA	NA	NA	-7.39841	0.71815	3.97e-10	0.00492629	207	2.29863	female unique
	D37-D48	J20-J22	NA	NA	NA	-5.50518	0.964818	7.92e-05	0.00493455	120	3.5863	common
	C51-C58	A00-A09	NA	NA	NA	-7.18715	0.73862	1.86e-09	0.004949	212	3.52877	female unique
	D10-D36	N30-N39	J90-J94	NA	NA	-4.28028	1.23972	0.029642	0.00496003	57	12.3863	female unique
	C51-C58	N30-N39	NA	NA	NA	-8.29879	0.639178	3.32e-13	0.00496965	356	2.26164	female unique
	K55-K64	E70-E90	NA	NA	NA	-18.981	0.278824	1.19e-76	0.00502992	5517	4.98082	female unique
	M05-M14	J90-J94	NA	NA	NA	-10.3188	0.512772	2.16e-21	0.00503568	364	3.64658	common
	M50-M54	K90-K93	NA	NA	NA	-6.56402	0.805915	1.35e-07	0.00504156	786	5.37397	female unique
	M20-M25	K70-K77	NA	NA	NA	-6.47389	0.817037	2.42e-07	0.00504475	448	5.78493	common
	K50-K52	I30-I52	N17-N19	NA	NA	-4.28793	1.23232	0.028783	0.00507165	102	9.32329	common
	K55-K64	M45-M49	N17-N19	NA	NA	-5.0004	1.0542	0.0010962	0.0051364	141	9.46575	female unique
	G50-G59	E70-E90	NA	NA	NA	-9.2919	0.56703	5.27e-17	0.00514987	1869	5.75342	female unique
	I10-I15	C76-C80	I26-I28	NA	NA	-7.40576	0.710761	3.77e-10	0.005176	84	4.78767	common
	E00-E07	I95-I99	NA	NA	NA	-7.32293	0.718146	6.91e-10	0.00520086	491	4.46575	common
	K80-K87	K90-K93	NA	NA	NA	-8.10866	0.648308	1.58e-12	0.00521139	788	4.36849	female unique
	C50-C50	B95-B98	NA	NA	NA	-9.47733	0.554285	9.21e-18	0.00523106	623	3.3589	female unique
	N80-N98	I10-I15	D60-D64	NA	NA	-5.97997	0.878112	5.2e-06	0.00524185	426	12.037	female unique
	C50-C50	L00-L08	NA	NA	NA	-4.75669	1.10277	0.00354815	0.00527095	558	2.57123	female unique
	K80-K87	D60-D64	NA	NA	NA	-9.25407	0.566322	7.49e-17	0.00529611	739	4.32603	female unique
	I10-I15	K55-K64	E70-E90	NA	NA	-8.83484	0.593179	3.36e-15	0.00529685	936	7.4863	female unique
	N80-N98	J40-J47	D60-D64	NA	NA	-4.86246	1.07629	0.00215524	0.00533515	221	10.5644	female unique
	J40-J47	J20-J22	NA	NA	NA	-10.4041	0.502921	8.91e-22	0.00534044	1301	4.43014	female unique
	K20-K31	E70-E90	NA	NA	NA	-18.2888	0.285641	4.89e-71	0.00538561	5724	5.66164	common
	C76-C80	D70-D77	NA	NA	NA	-14.5753	0.358022	1.79e-44	0.00541652	1005	0.326027	common
	J40-J47	B95-B98	NA	NA	NA	-11.7272	0.444808	3.69e-28	0.005427	1462	4.57123	common
	I10-I15	M05-M14	A00-A09	NA	NA	-5.29729	0.984575	0.000242	0.00543129	256	7.72466	common
	H30-H36	A00-A09	NA	NA	NA	-5.17153	1.00844	0.000462	0.00543334	199	4.61096	common
	N80-N98	C15-C26	D60-D64	NA	NA	-6.38043	0.815151	4.41e-07	0.005511	90	10.0644	female unique
	J30-J39	D60-D64	NA	NA	NA	-5.96506	0.869286	5.7e-06	0.00559805	338	6.3589	female unique
	E00-E07	B95-B98	NA	NA	NA	-9.16153	0.565531	1.76e-16	0.00562164	808	4.32192	female unique
	E10-E14	D60-D64	A00-A09	NA	NA	-4.16145	1.24469	0.0488272	0.00562974	109	8.19726	common
	G50-G59	K55-K64	N17-N19	NA	NA	-4.84947	1.06778	0.00229381	0.00563835	133	9.55342	female unique
	M65-M68	I95-I99	NA	NA	NA	-4.50413	1.14347	0.0112366	0.00579751	150	6.0411	female unique
	I20-I25	I70-I79	NA	NA	NA	-6.10917	0.842637	2.38e-06	0.00581211	616	4.47397	common
	E70-E90	A00-A09	NA	NA	NA	-13.3239	0.386341	7.16e-37	0.00581347	1490	3.6137	common
	I80-I89	M15-M19	J90-J94	NA	NA	-4.48878	1.14526	0.0120199	0.00585282	67	7.96986	female unique
	N80-N98	M70-M79	D60-D64	NA	NA	-4.30886	1.19108	0.026288	0.00590344	200	10.9877	female unique
	N70-N77	J90-J94	NA	NA	NA	-5.72726	0.895066	2.28e-05	0.00593865	146	5.37123	female unique
	I20-I25	H25-H28	N17-N19	NA	NA	-4.37785	1.16632	0.0195603	0.0060605	143	11.6822	common
	N30-N39	K70-K77	NA	NA	NA	-6.36236	0.801841	4.95e-07	0.00608701	479	5.95342	female unique
	E00-E07	D70-D77	NA	NA	NA	-6.92779	0.733876	1.16e-08	0.00619423	332	2.80274	female unique
	G50-G59	I30-I52	NA	NA	NA	-7.73438	0.657317	3.1e-11	0.00619545	975	6.0274	common
	C15-C26	N10-N16	NA	NA	NA	-6.88439	0.738396	1.56e-08	0.00619879	104	1.77123	common
	I10-I15	E70-E90	NA	NA	NA	-21.2196	0.239425	3.14e-96	0.00621682	7993	3.79178	common
	K40-K46	J90-J94	NA	NA	NA	-11.5446	0.439555	3.1e-27	0.00625438	537	4.56986	common
	C50-C50	I80-I89	NA	NA	NA	-8.88092	0.570505	2.23e-15	0.00630377	986	4.46164	female unique
	K55-K64	F10-F19	N17-N19	NA	NA	-5.23296	0.967673	0.000338	0.00632155	127	8.35342	female unique
	I10-I15	K65-K67	NA	NA	NA	-7.00401	0.722857	6.82e-09	0.0063272	789	3.75616	common
	F30-F39	A00-A09	NA	NA	NA	-7.44147	0.679312	2.89e-10	0.00637685	651	3.30137	common
	I10-I15	C76-C80	J20-J22	NA	NA	-8.18747	0.617335	8.33e-13	0.0063811	103	4.52603	common
	G40-G47	J90-J94	NA	NA	NA	-6.97765	0.723848	8.19e-09	0.00640449	217	4.13973	common
	I80-I89	J20-J22	NA	NA	NA	-8.98532	0.561871	8.74e-16	0.00641838	647	5.53425	common
	I10-I15	K90-K93	NA	NA	NA	-11.657	0.432545	8.4e-28	0.00645975	1996	4.66301	common
	M20-M25	I30-I52	NA	NA	NA	-10.0053	0.50317	5.28e-20	0.00651048	1702	5.87671	female unique
	M70-M79	A00-A09	NA	NA	NA	-8.02054	0.627222	3.23e-12	0.00653453	1010	5.57534	common
	E10-E14	D70-D77	NA	NA	NA	-6.37153	0.789542	4.67e-07	0.00653496	215	2.83288	common
	C15-C26	C76-C80	D70-D77	NA	NA	-5.43056	0.925825	0.000119	0.00655357	96	0.638356	common
	N70-N77	A00-A09	NA	NA	NA	-4.26691	1.17786	0.0313953	0.00656622	340	7.98356	female unique
	J40-J47	H25-H28	J90-J94	NA	NA	-4.66138	1.07738	0.00552172	0.00659088	47	8.27123	female unique
	C50-C50	D60-D64	NA	NA	NA	-11.0043	0.455404	1.4e-24	0.00666166	632	3.64521	female unique
	C43-C44	C76-C80	NA	NA	NA	-8.22523	0.609043	6.1e-13	0.00667412	334	4.07123	common
	K80-K87	J20-J22	NA	NA	NA	-8.29838	0.603611	3.34e-13	0.00667762	468	5.42466	female unique
	K50-K52	J20-J22	NA	NA	NA	-7.86192	0.63694	1.14e-11	0.00668713	551	4.93425	common
	I20-I25	J90-J94	NA	NA	NA	-10.9354	0.457369	3e-24	0.00672768	561	2.94795	common
	D10-D36	C76-C80	NA	NA	NA	-15.3885	0.324892	8.89e-50	0.00674071	1237	6.10411	common
	K40-K46	C76-C80	J20-J22	NA	NA	-6.30919	0.791496	6.91e-07	0.00678055	52	6.84247	common
	J40-J47	K90-K93	NA	NA	NA	-8.37653	0.596092	1.74e-13	0.00678405	1196	5.05616	common
	I10-I15	K50-K52	E70-E90	NA	NA	-5.32006	0.938458	0.000215	0.00678766	304	7.11918	female unique
	J40-J47	N10-N16	NA	NA	NA	-5.15553	0.966507	0.000501	0.00685443	322	5.13699	female unique
	K20-K31	I60-I69	J09-J18	NA	NA	-5.24941	0.947786	0.000311	0.00690628	92	10.089	common
	H25-H28	J90-J94	NA	NA	NA	-10.1375	0.490535	1.39e-20	0.00692386	311	3.82466	common
	M20-M25	J20-J22	NA	NA	NA	-8.01146	0.619731	3.48e-12	0.00697829	627	5.41096	common
	N60-N64	A30-A49	NA	NA	NA	-4.83844	1.02378	0.00241315	0.00705862	153	6.86027	female unique
	L80-L99	A00-A09	NA	NA	NA	-7.42262	0.667294	3.32e-10	0.0070617	527	5.98356	common
	M65-M68	D60-D64	NA	NA	NA	-4.7244	1.04806	0.004129	0.00707326	308	4.88082	female unique
	E10-E14	N30-N39	NA	NA	NA	-9.10246	0.543363	3.02e-16	0.00711224	1114	4.27945	common
	I10-I15	C76-C80	L00-L08	NA	NA	-4.96785	0.994677	0.001291	0.00714452	68	4.07808	female unique
	K20-K31	N10-N16	NA	NA	NA	-8.1082	0.60941	1.59e-12	0.00714591	499	4.83836	common
	D10-D36	C76-C80	D60-D64	NA	NA	-8.11107	0.607963	1.55e-12	0.00721763	114	6.86986	common
	K20-K31	D70-D77	NA	NA	NA	-10.9615	0.449134	2.25e-24	0.00727605	718	4.18493	common
	M20-M25	B95-B98	NA	NA	NA	-8.57315	0.573734	3.29e-14	0.00730857	1056	5.12192	common
	J40-J47	C76-C80	J20-J22	NA	NA	-6.84725	0.717515	2.01e-08	0.00735041	72	5.66849	female unique
	M05-M14	D70-D77	NA	NA	NA	-7.15471	0.685444	2.35e-09	0.00741568	293	2.83014	female unique
	M15-M19	J20-J22	NA	NA	NA	-10.3139	0.474143	2.27e-21	0.00751937	878	4.43836	common
	K50-K52	N10-N16	NA	NA	NA	-5.51027	0.886711	7.7e-05	0.00755143	246	5.76712	common
	I30-I52	A00-A09	NA	NA	NA	-10.3621	0.471218	1.38e-21	0.00757561	828	3.6726	common
	K40-K46	J20-J22	NA	NA	NA	-8.63753	0.565192	1.88e-14	0.00758292	706	5.82466	common
	D10-D36	C15-C26	C76-C80	NA	NA	-5.60615	0.86953	4.52e-05	0.00763728	136	6.92603	female unique
	M45-M49	A00-A09	NA	NA	NA	-6.49948	0.748813	2.05e-07	0.00769721	519	3.39726	common
	K40-K46	K70-K77	NA	NA	NA	-6.27914	0.77505	8.35e-07	0.00769915	585	4.67945	common
	I80-I89	A00-A09	NA	NA	NA	-8.70987	0.558708	1e-14	0.00770199	1073	6.57534	common
	G40-G47	A00-A09	NA	NA	NA	-6.23809	0.77949	1.08e-06	0.00773091	483	5.24658	common
	K20-K31	I30-I52	A00-A09	NA	NA	-4.82814	1.00693	0.00253713	0.00773818	170	10.7493	female unique
	D60-D64	A00-A09	NA	NA	NA	-10.1826	0.476785	8.75e-21	0.00779003	687	3.64658	common
	K50-K52	D60-D64	NA	NA	NA	-9.82899	0.49301	3.05e-19	0.00786141	917	4.89589	common
	D10-D36	D60-D64	A30-A49	NA	NA	-4.20992	1.14816	0.0399789	0.00795721	69	7.9726	female unique
	J40-J47	A00-A09	NA	NA	NA	-10.6807	0.452079	4.76e-23	0.00799817	1345	5.24932	common
	N70-N77	K55-K64	NA	NA	NA	-6.23447	0.774052	1.1e-06	0.00802011	1353	6.53699	female unique
	K40-K46	I60-I69	NA	NA	NA	-7.39825	0.652055	3.98e-10	0.00803407	612	5.99589	common
	M50-M54	B95-B98	NA	NA	NA	-7.92695	0.608379	6.84e-12	0.00804593	833	4.58082	common
	C50-C50	L80-L99	NA	NA	NA	-6.26533	0.769583	9.1e-07	0.00805316	833	3.0137	female unique
	J40-J47	H25-H28	A00-A09	NA	NA	-4.35713	1.10596	0.021361	0.00807639	96	8.60685	female unique
	M70-M79	K90-K93	NA	NA	NA	-6.4279	0.749381	3.26e-07	0.00809149	829	5.4411	common
	N30-N39	K90-K93	NA	NA	NA	-8.06248	0.596586	2.31e-12	0.00814818	1147	5.27945	common
	C51-C58	D70-D77	NA	NA	NA	-7.62016	0.630283	7.46e-11	0.00820624	236	0.49589	female unique
	L80-L99	K90-K93	NA	NA	NA	-5.11058	0.938807	0.000631	0.00824748	478	5.51233	female unique
	G50-G59	K55-K64	J09-J18	NA	NA	-6.18259	0.774605	1.52e-06	0.00832023	93	7.84384	female unique
	K80-K87	C76-C80	D70-D77	NA	NA	-5.07957	0.94271	0.000739	0.00832439	77	5.29315	female unique
	N80-N98	L80-L99	NA	NA	NA	-8.13976	0.588263	1.23e-12	0.00832645	2530	6.53151	female unique
	I20-I25	K90-K93	NA	NA	NA	-7.62145	0.627347	7.4e-11	0.00838514	777	5.18904	common
	C50-C50	D70-D77	NA	NA	NA	-9.41042	0.507701	1.73e-17	0.00841553	1214	0.350685	female unique
	M70-M79	F10-F19	NA	NA	NA	-5.08236	0.937971	0.000729	0.00850496	977	5.76712	common
	E10-E14	K90-K93	NA	NA	NA	-7.17413	0.664427	2.04e-09	0.00850857	524	4.16438	common
	C50-C50	K55-K64	NA	NA	NA	-11.5118	0.413688	4.53e-27	0.00854578	1861	5.55342	female unique
	E00-E07	A00-A09	NA	NA	NA	-8.22926	0.577373	5.91e-13	0.00863999	867	4.96712	common
	K80-K87	I26-I28	NA	NA	NA	-7.20858	0.659107	1.59e-09	0.00864109	248	4.2863	female unique
	I10-I15	D60-D64	NA	NA	NA	-15.866	0.29945	5.01e-53	0.0086424	2682	4.28219	common
	J30-J39	A00-A09	NA	NA	NA	-4.7456	1.00013	0.00373995	0.00868436	360	8.30411	female unique
	D10-D36	N30-N39	J09-J18	NA	NA	-6.30102	0.752929	7.28e-07	0.00870188	125	10.7918	female unique
	K50-K52	B95-B98	NA	NA	NA	-10.0695	0.470715	2.76e-20	0.00873974	850	5.05205	common
	M50-M54	D60-D64	NA	NA	NA	-8.11323	0.583972	1.53e-12	0.00875701	833	4.86027	common
	C15-C26	A00-A09	NA	NA	NA	-9.20488	0.514547	1.18e-16	0.00877064	331	0.961644	common
	J40-J47	D70-D77	NA	NA	NA	-9.18356	0.515688	1.44e-16	0.00877496	505	3.64932	common
	E10-E14	A00-A09	NA	NA	NA	-8.34416	0.567529	2.28e-13	0.00877757	788	5.21644	common
	K50-K52	K90-K93	NA	NA	NA	-7.60096	0.62164	8.64e-11	0.00887017	1040	5.32466	common
	K20-K31	K90-K93	NA	NA	NA	-11.0355	0.427666	9.94e-25	0.00891947	2316	4.79726	female unique
	I10-I15	B95-B98	NA	NA	NA	-15.4946	0.303863	1.72e-50	0.00902053	2346	4.29863	common
	K55-K64	F30-F39	NA	NA	NA	-9.47056	0.496447	9.82e-18	0.00908046	2631	5.23562	common
	D10-D36	C15-C26	NA	NA	NA	-9.60899	0.48899	2.61e-18	0.00910716	677	4.85205	female unique
	N70-N77	D70-D77	NA	NA	NA	-4.8274	0.972765	0.00254378	0.00913236	158	6.38904	female unique
	K40-K46	L00-L08	NA	NA	NA	-6.23996	0.751811	1.07e-06	0.00917498	633	5.30959	common
	K20-K31	K80-K87	K90-K93	NA	NA	-4.20626	1.11496	0.0405541	0.00918847	182	8.75342	female unique
	G50-G59	J20-J22	NA	NA	NA	-6.7167	0.695492	4.88e-08	0.00935905	378	5.58904	common
	C43-C44	L80-L99	NA	NA	NA	-4.54581	1.0263	0.00932504	0.00941596	908	1.92877	female unique
	C50-C50	N30-N39	NA	NA	NA	-9.21157	0.50621	1.11e-16	0.00943816	861	4.73425	female unique
	M20-M25	L00-L08	NA	NA	NA	-4.72035	0.986855	0.0042073	0.00948255	699	5.03836	female unique
	K50-K52	I70-I79	NA	NA	NA	-5.11977	0.909527	0.000603	0.00949902	373	5.80548	common
	J40-J47	L00-L08	NA	NA	NA	-7.62457	0.610225	7.22e-11	0.00953582	860	4.99863	female unique
	I10-I15	D60-D64	A00-A09	NA	NA	-6.41831	0.723986	3.47e-07	0.00959258	228	7.32603	common
	C51-C58	J90-J94	NA	NA	NA	-12.3266	0.376008	2.68e-31	0.00970708	208	1.83288	female unique
	N10-N16	A00-A09	NA	NA	NA	-5.18787	0.893051	0.000425	0.00972525	192	3.93562	common
	N70-N77	D60-D64	NA	NA	NA	-5.71178	0.809874	2.5e-05	0.00979562	348	4.93151	female unique
	K00-K14	F40-F48	NA	NA	NA	-4.60111	1.00476	0.00727454	0.00982306	487	6.23836	common
	K20-K31	L00-L08	NA	NA	NA	-8.07515	0.5719	2.08e-12	0.00987076	983	5.31233	common
	I20-I25	J20-J22	NA	NA	NA	-8.30696	0.555613	3.11e-13	0.00989767	625	4.73699	common
	G50-G59	D60-D64	NA	NA	NA	-7.18999	0.640837	1.82e-09	0.00997557	671	5.46027	common
	E10-E14	K70-K77	NA	NA	NA	-6.5905	0.697628	1.13e-07	0.0100748	431	4.00822	common
	I10-I15	M15-M19	I30-I52	NA	NA	-6.92498	0.662816	1.18e-08	0.010153	567	8.09863	female unique
	I10-I15	N30-N39	NA	NA	NA	-15.0259	0.305374	2.23e-47	0.0101679	3717	4.09589	common
	N80-N98	D60-D64	NA	NA	NA	-13.2623	0.345628	1.63e-36	0.0102156	2405	6.97534	female unique
	N80-N98	C51-C58	J90-J94	NA	NA	-6.17325	0.742211	1.61e-06	0.0102359	63	7.20548	female unique
	C51-C58	N10-N16	NA	NA	NA	-8.87327	0.516136	2.39e-15	0.0102568	166	2.2411	female unique
	M20-M25	A00-A09	NA	NA	NA	-7.78383	0.587978	2.12e-11	0.0102886	1151	5.90959	female unique
	K40-K46	F30-F39	N17-N19	NA	NA	-4.33374	1.05401	0.023602	0.0103805	86	8.33973	female unique
	G50-G59	F40-F48	NA	NA	NA	-4.8443	0.941488	0.00234933	0.0104532	630	5.97945	common
	K50-K52	A00-A09	NA	NA	NA	-9.29581	0.489581	5.08e-17	0.0105561	1207	6.18356	common
	I20-I25	D70-D77	NA	NA	NA	-6.54331	0.695145	1.54e-07	0.0105826	237	4.3863	common
	K20-K31	C15-C26	NA	NA	NA	-13.6783	0.332518	5.9e-39	0.0105852	800	2.9863	common
	K20-K31	C15-C26	C76-C80	N17-N19	NA	-4.91673	0.924459	0.00165798	0.0106169	20	6.66986	common
	N30-N39	A00-A09	NA	NA	NA	-10.3366	0.439686	1.8e-21	0.0106217	1204	5.86438	common
	C15-C26	D70-D77	NA	NA	NA	-8.81974	0.51484	3.84e-15	0.0106653	302	0.472603	common
	D37-D48	A00-A09	NA	NA	NA	-6.23523	0.727224	1.1e-06	0.0107332	202	3.70822	common
	I10-I15	L00-L08	NA	NA	NA	-10.2612	0.441382	3.91e-21	0.0107901	1424	4.57123	common
	I10-I15	E70-E90	A00-A09	NA	NA	-8.36156	0.540204	1.97e-13	0.0109223	458	7.70959	female unique
	M70-M79	D60-D64	NA	NA	NA	-9.71268	0.464093	9.52e-19	0.0110251	1031	4.72055	common
	M50-M54	A00-A09	NA	NA	NA	-7.77045	0.579963	2.35e-11	0.0110363	889	5.79452	common
	C50-C50	M80-M85	NA	NA	NA	-6.57481	0.684086	1.25e-07	0.0111342	762	5.48493	female unique
	M70-M79	D70-D77	NA	NA	NA	-7.21417	0.62233	1.53e-09	0.0112252	328	4.02877	female unique
	J40-J47	I70-I79	NA	NA	NA	-6.87137	0.653336	1.7e-08	0.0112284	633	4.95068	female unique
	K20-K31	H25-H28	A00-A09	NA	NA	-4.8149	0.93231	0.00269659	0.0112321	135	9.7726	common
	C50-C50	C15-C26	NA	NA	NA	-5.22079	0.857129	0.00036	0.0113915	199	6.09863	female unique
	D10-D36	D60-D64	NA	NA	NA	-11.317	0.394635	4.22e-26	0.0114921	1469	5.97808	common
	J30-J39	E70-E90	NA	NA	NA	-7.8001	0.572127	1.86e-11	0.0115317	930	7.19315	common
	I10-I15	I30-I52	A00-A09	NA	NA	-5.74101	0.773965	2.11e-05	0.0117566	274	7.93973	common
	C51-C58	K50-K52	NA	NA	NA	-4.29011	1.02809	0.0285202	0.0121477	190	3.17397	female unique
	N80-N98	C51-C58	NA	NA	NA	-7.06323	0.623979	4.5e-09	0.012188	1135	1.89315	female unique
	E00-E07	K90-K93	NA	NA	NA	-6.10884	0.720675	2.38e-06	0.0122469	732	4.42603	female unique
	M20-M25	D60-D64	NA	NA	NA	-8.56874	0.511775	3.41e-14	0.0124596	1193	5.12055	common
	J40-J47	F30-F39	J09-J18	NA	NA	-4.42038	0.992024	0.0163356	0.0124613	146	9.26438	female unique
	K20-K31	A00-A09	NA	NA	NA	-13.1092	0.333903	1.23e-35	0.0125606	2270	5.43699	common
	I10-I15	I70-I79	NA	NA	NA	-8.62537	0.507361	2.09e-14	0.0125733	1256	4.67534	common
	I10-I15	F30-F39	NA	NA	NA	-10.092	0.433402	2.2e-20	0.012602	2516	4.6411	common
	I20-I25	N10-N16	NA	NA	NA	-4.76252	0.915422	0.00345474	0.012782	204	4.59178	common
	M15-M19	I26-I28	NA	NA	NA	-9.48149	0.459792	8.86e-18	0.0127847	540	3.63973	common
	G50-G59	K70-K77	NA	NA	NA	-4.89946	0.88762	0.00180058	0.0129216	288	5.8863	common
	M70-M79	D50-D53	NA	NA	NA	-4.73452	0.915811	0.00393912	0.0130897	774	5.48082	common
	H25-H28	A00-A09	NA	NA	NA	-8.08909	0.53585	1.86e-12	0.013108	601	3.76164	common
	D37-D48	C15-C26	NA	NA	NA	-5.49316	0.788917	8.46e-05	0.0131196	222	0.150685	common
	E00-E07	D60-D64	NA	NA	NA	-9.90037	0.436943	1.51e-19	0.0132217	937	3.93973	female unique
	J40-J47	M15-M19	J20-J22	NA	NA	-4.48857	0.963466	0.0120248	0.0132391	154	8.00685	female unique
	J40-J47	D60-D64	NA	NA	NA	-11.3558	0.380789	2.72e-26	0.0132446	1352	4.72877	common
	N30-N39	L00-L08	NA	NA	NA	-7.32939	0.589661	6.6e-10	0.0132752	687	4.84658	female unique
	N80-N98	C51-C58	N10-N16	NA	NA	-4.89105	0.881595	0.00187657	0.0134077	46	7.10137	female unique
	J40-J47	M05-M14	A00-A09	NA	NA	-4.47008	0.962729	0.0130581	0.0135215	160	7.91644	female unique
	M05-M14	A00-A09	NA	NA	NA	-8.45162	0.50707	9.23e-14	0.0137658	882	3.8589	common
	N80-N98	C15-C26	NA	NA	NA	-11.4605	0.373201	8.19e-27	0.0138832	750	8.38219	female unique
	D10-D36	B95-B98	NA	NA	NA	-9.78409	0.43634	4.74e-19	0.0139932	1315	6.21644	common
	N80-N98	K50-K52	D60-D64	NA	NA	-4.66245	0.915095	0.00549625	0.0140296	167	10.9753	female unique
	I10-I15	A00-A09	NA	NA	NA	-13.9209	0.306445	2.05e-40	0.0140379	2354	5.11781	common
	C50-C50	M50-M54	NA	NA	NA	-7.06975	0.603324	4.3e-09	0.014047	614	5.27397	female unique
	M20-M25	C15-C26	NA	NA	NA	-8.12579	0.52482	1.38e-12	0.0140578	294	5.76849	female unique
	I20-I25	B95-B98	NA	NA	NA	-8.98056	0.474775	9.12e-16	0.0140696	860	4.45616	common
	G50-G59	I20-I25	NA	NA	NA	-4.80226	0.887589	0.00286635	0.014088	864	5.58082	female unique
	C51-C58	B95-B98	NA	NA	NA	-8.17324	0.521199	9.36e-13	0.0141239	217	2.14521	female unique
	J40-J47	E65-E68	NA	NA	NA	-5.57321	0.763387	5.42e-05	0.0141999	1755	5.43014	common
	I20-I25	A00-A09	NA	NA	NA	-8.97092	0.474013	9.95e-16	0.014231	812	5.77945	common
	K40-K46	I26-I28	NA	NA	NA	-8.51399	0.499336	5.45e-14	0.0142452	382	5.01781	female unique
	E65-E68	A00-A09	NA	NA	NA	-5.73685	0.739599	2.16e-05	0.0143649	450	3.43288	common
	L80-L99	F40-F48	NA	NA	NA	-4.82423	0.878604	0.00258183	0.014428	430	6.49178	female unique
	D10-D36	K90-K93	NA	NA	NA	-7.44076	0.566002	2.9e-10	0.0148243	1360	7.32055	common
	I20-I25	D60-D64	NA	NA	NA	-8.83393	0.474934	3.39e-15	0.0150627	993	4.92877	common
	K55-K64	A00-A09	NA	NA	NA	-13.6577	0.306751	7.82e-39	0.0151537	2321	5.36986	common
	N80-N98	N10-N16	NA	NA	NA	-8.41834	0.496885	1.22e-13	0.0152535	682	6.82466	female unique
	N80-N98	C51-C58	D60-D64	NA	NA	-5.3921	0.775155	0.000146	0.0153029	109	6.49315	female unique
	M70-M79	J20-J22	NA	NA	NA	-8.56134	0.488145	3.64e-14	0.0153111	639	4.75068	common
	M15-M19	B95-B98	NA	NA	NA	-11.0145	0.377631	1.25e-24	0.0156165	1424	3.84247	common
	I10-I15	H53-H54	NA	NA	NA	-5.50322	0.754291	8e-05	0.0157482	788	4.84932	common
	M50-M54	K70-K77	NA	NA	NA	-4.47643	0.924423	0.0126829	0.0159529	339	5.89589	female unique
	M15-M19	A00-A09	NA	NA	NA	-10.3156	0.400208	2.23e-21	0.0161085	1488	4.5589	common
	N30-N39	F30-F39	NA	NA	NA	-7.23388	0.57022	1.32e-09	0.0161651	1519	6.31507	female unique
	M20-M25	F10-F19	NA	NA	NA	-4.78666	0.860004	0.00308807	0.0163007	1059	6.50411	common
	K40-K46	F40-F48	NA	NA	NA	-6.41248	0.64073	3.6e-07	0.0164296	1060	6.24521	common
	K40-K46	F10-F19	NA	NA	NA	-5.88537	0.697364	9.16e-06	0.0165025	1009	6.21918	common
	K80-K87	D50-D53	NA	NA	NA	-4.56303	0.89854	0.00862691	0.0165716	569	6.0137	female unique
	K20-K31	K80-K87	NA	NA	NA	-10.4831	0.389811	3.89e-22	0.0167989	3684	2.8274	common
	I20-I25	F40-F48	NA	NA	NA	-5.09536	0.801817	0.000682	0.0168139	684	5.27123	common
	C51-C58	D60-D64	NA	NA	NA	-11.0982	0.367857	4.95e-25	0.0168644	387	0.950685	female unique
	J30-J39	B95-B98	NA	NA	NA	-5.31955	0.767098	0.000215	0.0168971	386	6.63699	common
	D10-D36	N30-N39	A00-A09	NA	NA	-4.24595	0.960781	0.0343476	0.0169171	162	10.9274	female unique
	H00-H06	E70-E90	NA	NA	NA	-6.07158	0.669326	2.99e-06	0.0171824	817	6.23836	female unique
	I10-I15	I80-I89	NA	NA	NA	-11.7649	0.343644	2.37e-28	0.0175459	3278	4.16027	common
	N30-N39	M70-M79	NA	NA	NA	-7.18116	0.562745	1.94e-09	0.017577	2016	5.95342	female unique
	I10-I15	F10-F19	NA	NA	NA	-9.13048	0.441139	2.34e-16	0.0178132	1876	5.11096	common
	K55-K64	I70-I79	NA	NA	NA	-7.23838	0.556209	1.28e-09	0.0178446	948	5.09041	female unique
	C51-C58	L00-L08	NA	NA	NA	-5.00456	0.803876	0.00107388	0.0178983	121	2.64932	female unique
	E00-E07	K70-K77	NA	NA	NA	-5.01721	0.801071	0.00100687	0.0179684	362	4.46849	female unique
	K50-K52	F30-F39	NA	NA	NA	-5.60691	0.715888	4.5e-05	0.0180624	1024	6.05753	common
	I10-I15	K55-K64	NA	NA	NA	-16.867	0.23771	3.7e-60	0.0181434	7757	4.15068	common
	E10-E14	L00-L08	NA	NA	NA	-6.75103	0.59346	3.88e-08	0.0181976	517	4.76164	common
	K50-K52	L00-L08	NA	NA	NA	-6.21041	0.644871	1.28e-06	0.0182259	493	5.19452	female unique
	K80-K87	A00-A09	NA	NA	NA	-8.64356	0.462544	1.79e-14	0.0183517	921	4.87671	common
	G50-G59	A00-A09	NA	NA	NA	-6.6427	0.598295	8e-08	0.0187926	672	6.75205	common
	K20-K31	D37-D48	NA	NA	NA	-7.10505	0.558944	3.35e-09	0.0188484	548	4.77534	common
	L60-L75	K55-K64	NA	NA	NA	-4.8995	0.808819	0.00180058	0.0190096	1168	6.48904	female unique
	M15-M19	D60-D64	NA	NA	NA	-11.32	0.34954	4.09e-26	0.0191243	1676	4.12192	common
	J30-J39	K55-K64	NA	NA	NA	-5.29234	0.747477	0.000248	0.0191414	1497	6.63014	common
	D10-D36	N30-N39	NA	NA	NA	-9.60329	0.411746	2.75e-18	0.0191757	2662	5.67397	common
	K65-K67	A00-A09	NA	NA	NA	-4.85551	0.811806	0.00222866	0.0194146	237	4.46027	female unique
	I70-I79	A00-A09	NA	NA	NA	-6.15112	0.640354	1.84e-06	0.0194698	269	4.29589	common
	I10-I15	H90-H95	NA	NA	NA	-5.03901	0.780039	0.000905	0.0196315	772	4.63425	common
	G50-G59	M80-M85	NA	NA	NA	-4.24354	0.922073	0.0346752	0.0199834	690	5.8863	female unique
	N80-N98	C51-C58	B95-B98	NA	NA	-5.18283	0.753907	0.000437	0.0200933	68	6.50685	female unique
	D10-D36	M15-M19	D60-D64	NA	NA	-4.24143	0.920936	0.0349807	0.0201191	178	11.2384	female unique
	C43-C44	C15-C26	NA	NA	NA	-5.02559	0.77118	0.000967	0.0207412	131	4.69589	female unique
	N80-N98	M15-M19	D60-D64	NA	NA	-5.04634	0.765641	0.000871	0.0209905	318	11.7096	female unique
	J40-J47	F30-F39	NA	NA	NA	-7.4893	0.515456	2.02e-10	0.0210594	1797	5.03836	female unique
	I10-I15	D50-D53	NA	NA	NA	-8.33364	0.462704	2.49e-13	0.0211522	2041	4.88219	common
	D10-D36	D37-D48	NA	NA	NA	-5.79151	0.663904	1.58e-05	0.0213862	569	5.55616	female unique
	M50-M54	F30-F39	NA	NA	NA	-6.10699	0.629026	2.41e-06	0.0214624	1316	5.4589	female unique
	J40-J47	M80-M85	NA	NA	NA	-8.25457	0.465096	4.79e-13	0.0215115	1604	5.30411	common
	I10-I15	G40-G47	NA	NA	NA	-7.64122	0.501067	6.37e-11	0.0217366	1863	4.41644	common
	M20-M25	K55-K64	J90-J94	NA	NA	-4.64688	0.823333	0.0058975	0.0217982	83	8.6137	female unique
	K00-K14	A00-A09	NA	NA	NA	-6.09989	0.627185	2.51e-06	0.0218018	468	5.43288	common
	K40-K46	A00-A09	NA	NA	NA	-9.59981	0.398355	2.85e-18	0.0218373	1266	5.41644	common
	N80-N98	F30-F39	NA	NA	NA	-8.43358	0.452514	1.08e-13	0.0220089	3251	8.97534	female unique
	K55-K64	H53-H54	NA	NA	NA	-5.40549	0.704924	0.000136	0.0221379	610	5.25205	common
	I10-I15	K50-K52	NA	NA	NA	-9.23987	0.412124	8.53e-17	0.0221931	2056	3.62329	common
	J30-J39	K80-K87	NA	NA	NA	-4.38295	0.866453	0.0191665	0.0224241	465	6.66301	female unique
	I80-I89	F40-F48	NA	NA	NA	-6.2217	0.606067	1.19e-06	0.0230345	982	7.32329	common
	C50-C50	D60-D64	A00-A09	NA	NA	-4.65252	0.809012	0.00574477	0.023192	39	9.16164	female unique
	I10-I15	M70-M79	NA	NA	NA	-9.47896	0.396851	9.07e-18	0.0232434	3693	4.22192	common
	K20-K31	I70-I79	NA	NA	NA	-6.73002	0.556831	4.47e-08	0.0235769	949	5.53425	common
	J40-J47	M40-M43	NA	NA	NA	-4.39943	0.851493	0.0178435	0.0236101	462	5.84932	female unique
	I20-I25	D50-D53	NA	NA	NA	-5.90908	0.632323	7.97e-06	0.0238386	802	4.91507	common
	M70-M79	E65-E68	NA	NA	NA	-5.16588	0.722053	0.000475	0.0239918	1426	5.60822	common
	J40-J47	F40-F48	NA	NA	NA	-7.40683	0.503226	3.74e-10	0.0240574	1284	5.4274	common
	K20-K31	M40-M43	NA	NA	NA	-4.98789	0.747034	0.00116755	0.024086	707	6.06301	female unique
	K55-K64	E65-E68	N17-N19	NA	NA	-4.29356	0.867719	0.0281152	0.0240985	146	8.89041	common
	G50-G59	F30-F39	NA	NA	NA	-5.91695	0.629017	7.61e-06	0.0241889	1021	5.47945	common
	L60-L75	B95-B98	NA	NA	NA	-4.36458	0.85213	0.0206746	0.0242535	253	5.99726	common
	K40-K46	F30-F39	NA	NA	NA	-6.37193	0.582874	4.66e-07	0.0243791	1534	5.43562	common
	N80-N98	I80-I89	NA	NA	NA	-9.7461	0.380503	6.88e-19	0.0245163	5118	6.70685	female unique
	E10-E14	D60-D64	NA	NA	NA	-9.84019	0.376623	2.74e-19	0.0245745	1041	4.84384	common
	G50-G59	K55-K64	NA	NA	NA	-7.69076	0.475981	4.35e-11	0.0257156	2503	5.38356	female unique
	N30-N39	F10-F19	NA	NA	NA	-5.66457	0.643709	3.26e-05	0.0260865	1009	7.00822	female unique
	E10-E14	M05-M14	NA	NA	NA	-4.70879	0.773283	0.00443572	0.0262202	1108	5.06986	common
	K55-K64	H90-H95	NA	NA	NA	-5.78981	0.627615	1.6e-05	0.0264164	744	5.31644	common
	M50-M54	F40-F48	NA	NA	NA	-5.3756	0.674925	0.00016	0.0265659	816	5.99863	common
	M20-M25	F40-F48	NA	NA	NA	-6.19831	0.584011	1.38e-06	0.0267859	991	6.12055	common
	E10-E14	E65-E68	NA	NA	NA	-5.67588	0.635868	3.06e-05	0.027076	1261	4.54521	common
	L80-L99	F10-F19	NA	NA	NA	-4.53978	0.794309	0.00957309	0.0271606	492	7.07808	female unique
	K55-K64	F10-F19	NA	NA	NA	-7.89556	0.454228	8.76e-12	0.0276982	2003	5.86575	female unique
	K80-K87	M80-M85	NA	NA	NA	-5.48805	0.652648	8.7e-05	0.0278264	644	5.76849	female unique
	N80-N98	C51-C58	K55-K64	NA	NA	-5.48789	0.652578	8.7e-05	0.02784	243	6.81096	female unique
	K20-K31	F30-F39	NA	NA	NA	-9.37192	0.381746	2.49e-17	0.0279401	2594	6.15342	common
	H00-H06	I95-I99	NA	NA	NA	-4.65316	0.765476	0.00573044	0.0283855	145	6.4411	female unique
	I10-I15	N30-N39	J20-J22	NA	NA	-5.67165	0.626232	3.13e-05	0.0286737	193	7.3863	female unique
	K20-K31	F10-F19	NA	NA	NA	-7.90943	0.447267	7.86e-12	0.0290822	1893	6.90685	common
	I10-I15	F40-F48	NA	NA	NA	-9.28463	0.38049	5.64e-17	0.0292257	1943	4.86575	common
	K40-K46	M40-M43	NA	NA	NA	-4.19608	0.83836	0.0422296	0.0296638	393	5.47123	female unique
	I10-I15	M40-M43	NA	NA	NA	-4.83528	0.726735	0.00245042	0.0297785	847	5.27397	female unique
	K50-K52	M70-M79	NA	NA	NA	-5.83612	0.601943	1.22e-05	0.029807	1354	5.55205	common
	N80-N98	K55-K64	NA	NA	NA	-13.8612	0.253248	4.72e-40	0.0298875	10877	7.54795	female unique
	I20-I25	L00-L08	NA	NA	NA	-6.24796	0.561249	1.02e-06	0.0299968	468	5.75479	common
	M80-M85	A00-A09	NA	NA	NA	-7.28368	0.479874	9.23e-10	0.0303413	539	3.58082	common
	K80-K87	M70-M79	NA	NA	NA	-4.84975	0.714809	0.00229185	0.0312215	1297	5.41096	female unique
	K80-K87	F10-F19	NA	NA	NA	-4.41174	0.781812	0.0169196	0.0317725	651	6.46301	female unique
	G40-G47	K90-K93	NA	NA	NA	-4.65699	0.737017	0.00562794	0.0323131	456	5.33014	common
	K50-K52	F10-F19	NA	NA	NA	-5.5404	0.618957	6.51e-05	0.0324107	806	6.72877	common
	E00-E07	F40-F48	NA	NA	NA	-5.09852	0.671433	0.000671	0.0326041	706	4.84932	female unique
	L80-L99	E65-E68	NA	NA	NA	-4.18679	0.817592	0.0439096	0.0326116	580	6.50411	female unique
	K20-K31	M50-M54	NA	NA	NA	-8.87873	0.384627	2.28e-15	0.0328765	3011	5.4411	common
	N80-N98	F40-F48	NA	NA	NA	-7.06594	0.483044	4.41e-09	0.0329369	2130	9.3411	female unique
	K20-K31	H90-H95	NA	NA	NA	-5.28038	0.643228	0.000264	0.0334906	672	6.2	common
	D10-D36	K65-K67	NA	NA	NA	-4.18814	0.810211	0.0436782	0.0335984	613	5.40822	common
	E10-E14	D50-D53	NA	NA	NA	-5.84114	0.580024	1.19e-05	0.0337761	933	5.59452	common
	N30-N39	F40-F48	NA	NA	NA	-6.52629	0.51685	1.72e-07	0.0342827	988	6.37945	common
	K20-K31	H53-H54	NA	NA	NA	-4.90594	0.686204	0.00174715	0.0345112	643	5.71507	common
	N80-N98	K55-K64	F30-F39	NA	NA	-5.03151	0.667754	0.000939	0.0347418	611	12.0658	female unique
	I80-I89	M80-M85	NA	NA	NA	-7.05334	0.475747	4.83e-09	0.0348881	1232	6.68767	common
	M20-M25	F30-F39	NA	NA	NA	-5.92361	0.566155	7.32e-06	0.0349554	1513	5.50959	common	28.6079
	N80-N98	J40-J47	NA	NA	NA	-8.27529	0.402426	4.04e-13	0.0357863	5049	7.88493	female unique
	C50-C50	K00-K14	NA	NA	NA	-5.26527	0.632223	0.000286	0.0358351	488	4.81096	female unique
	M50-M54	D50-D53	NA	NA	NA	-4.33195	0.767608	0.0237799	0.0359638	688	4.86164	common
	K55-K64	F40-F48	NA	NA	NA	-9.04037	0.364735	5.32e-16	0.0369816	1962	5.62603	common
	K80-K87	F40-F48	NA	NA	NA	-5.40977	0.60598	0.000133	0.0376956	597	5.73151	female unique
	K55-K64	M40-M43	NA	NA	NA	-4.57648	0.71338	0.00812838	0.0382057	691	5.40822	female unique
	N80-N98	K80-K87	NA	NA	NA	-9.13885	0.356731	2.17e-16	0.038384	3403	6.93425	female unique
	N80-N98	E10-E14	NA	NA	NA	-6.80928	0.476766	2.61e-08	0.0389128	2428	8.84521	female unique
	E10-E14	M80-M85	NA	NA	NA	-5.55365	0.584246	6.04e-05	0.0389802	524	5.19041	female unique
	N80-N98	I20-I25	NA	NA	NA	-7.83454	0.413669	1.42e-11	0.0391282	2686	7.98767	female unique
	K50-K52	F40-F48	NA	NA	NA	-5.25865	0.616035	0.000296	0.0391831	688	6.68767	common
	J40-J47	D50-D53	NA	NA	NA	-7.04703	0.456826	5.05e-09	0.0399845	1175	5.2	common
	K20-K31	F40-F48	NA	NA	NA	-8.46646	0.379937	8.15e-14	0.0400863	1971	6.26849	common
	K80-K87	M45-M49	NA	NA	NA	-5.59778	0.574557	4.73e-05	0.0401054	773	6.63836	female unique
	I10-I15	M80-M85	NA	NA	NA	-9.7512	0.32787	6.54e-19	0.0408795	2257	4.73425	common
	N80-N98	D50-D53	NA	NA	NA	-6.32727	0.505262	6.17e-07	0.0408876	1868	8.19589	female unique
	K50-K52	M50-M54	NA	NA	NA	-5.54025	0.575857	6.51e-05	0.0411556	1015	5.77808	common
	I10-I15	M15-M19	D50-D53	NA	NA	-4.25425	0.747917	0.0331414	0.0415099	298	8.35068	female unique
	N80-N98	K55-K64	F40-F48	NA	NA	-4.31046	0.734951	0.026129	0.0420886	446	12.1192	female unique
	I20-I25	M80-M85	NA	NA	NA	-6.33501	0.497426	5.87e-07	0.0428009	815	5.4274	common
	E00-E07	D50-D53	NA	NA	NA	-5.55564	0.566214	5.97e-05	0.0430376	806	4.86301	female unique
	J40-J47	M70-M79	NA	NA	NA	-7.08555	0.44378	3.84e-09	0.0430917	2360	4.84795	female unique
	K50-K52	M80-M85	NA	NA	NA	-6.49205	0.481341	2.15e-07	0.0439419	922	6.82055	common
	E10-E14	M70-M79	NA	NA	NA	-5.79064	0.535804	1.59e-05	0.0449301	1031	4.25205	common
	K20-K31	M45-M49	NA	NA	NA	-7.64407	0.404742	6.23e-11	0.045326	2468	5.98356	common
	I80-I89	M50-M54	NA	NA	NA	-6.20083	0.491422	1.36e-06	0.0474907	1597	5.67945	female unique
	I80-I89	M45-M49	NA	NA	NA	-5.72366	0.529094	2.33e-05	0.0483951	1288	6.14521	common
	J40-J47	H53-H54	NA	NA	NA	-5.01863	0.603185	0.00100021	0.0484528	428	4.76575	female unique
	K55-K64	M45-M49	NA	NA	NA	-7.48163	0.403456	2.14e-10	0.0488742	2324	5.47534	common
	K40-K46	E65-E68	NA	NA	NA	-5.21137	0.577038	0.000377	0.0494321	1650	6.10137	common
	K55-K64	M05-M14	NA	NA	NA	-7.66441	0.389521	5.33e-11	0.050517	3418	5.25479	common
	J40-J47	H90-H95	NA	NA	NA	-4.43527	0.670264	0.0152742	0.0511598	482	5.11644	common
	M15-M19	D50-D53	NA	NA	NA	-6.72756	0.438177	4.54e-08	0.0524518	1289	4.47397	common
	M70-M79	F40-F48	NA	NA	NA	-5.31987	0.550871	0.000215	0.0533669	929	5.35068	common
	N30-N39	M80-M85	NA	NA	NA	-7.20563	0.402909	1.62e-09	0.0548467	1162	6.19041	female unique
	L60-L75	N30-N39	NA	NA	NA	-4.61443	0.627728	0.0068509	0.0552103	492	6.2	female unique
	I80-I89	G40-G47	NA	NA	NA	-4.60495	0.622693	0.0071538	0.0568424	939	6.2137	female unique
	C50-C50	K40-K46	NA	NA	NA	-4.79859	0.593442	0.00291608	0.0579783	907	5.38904	female unique
	N30-N39	E65-E68	NA	NA	NA	-5.41921	0.523459	0.000127	0.0586167	1337	6.50411	common
	I10-I15	K20-K31	NA	NA	NA	-12.1419	0.232863	2.58e-30	0.0591658	6941	4.17808	common
	K50-K52	M20-M25	NA	NA	NA	-4.31412	0.65173	0.0257189	0.0601063	1344	5.58904	female unique
	J40-J47	M05-M14	NA	NA	NA	-7.23711	0.386575	1.29e-09	0.0609509	2422	5.13699	female unique
	E00-E07	E65-E68	NA	NA	NA	-4.81438	0.57967	0.00270216	0.061375	1052	4.95342	female unique
	K20-K31	M80-M85	NA	NA	NA	-8.2636	0.336382	4.45e-13	0.0620553	2436	6.26712	common
	K20-K31	M70-M79	NA	NA	NA	-8.51104	0.324166	5.59e-14	0.063356	3731	5.76986	common
	I80-I89	M70-M79	NA	NA	NA	-7.39566	0.372451	4.05e-10	0.0636395	2202	5.71507	common
	M20-M25	M80-M85	NA	NA	NA	-5.43907	0.5056	0.000114	0.0639283	1369	5.8411	female unique
	J40-J47	M45-M49	NA	NA	NA	-6.58554	0.41717	1.17e-07	0.0641012	1548	5.20548	female unique
	N80-N98	K50-K52	NA	NA	NA	-7.26392	0.377199	1.06e-09	0.064574	2846	6.46027	female unique
	K50-K52	M05-M14	NA	NA	NA	-4.94555	0.553206	0.00143887	0.0648353	1280	6.29863	common
	K55-K64	M80-M85	NA	NA	NA	-9.43283	0.287744	1.4e-17	0.0662554	2382	5.36849	female unique
	N30-N39	K40-K46	NA	NA	NA	-5.71653	0.472693	2.43e-05	0.06706	2412	5.50411	female unique
	I20-I25	M45-M49	NA	NA	NA	-4.68358	0.566955	0.00497845	0.070272	896	5.3863	common
	I10-I15	M05-M14	NA	NA	NA	-8.84354	0.299734	3.11e-15	0.0706011	4109	4.69315	common
	N80-N98	M05-M14	NA	NA	NA	-6.40849	0.41144	3.69e-07	0.0715965	3812	8.97123	female unique
	N80-N98	M50-M54	NA	NA	NA	-7.45811	0.352838	2.55e-10	0.0719699	3730	7.39041	female unique
	K80-K87	M05-M14	NA	NA	NA	-5.35127	0.491608	0.000183	0.0720262	1162	5.93562	female unique
	M05-M14	D50-D53	NA	NA	NA	-4.95374	0.528365	0.00138466	0.0729937	753	4.34521	common
	M50-M54	F10-F19	NA	NA	NA	-5.15118	0.499923	0.000512	0.076139	956	5.96164	female unique
	K40-K46	M80-M85	NA	NA	NA	-6.21672	0.410211	1.23e-06	0.0780686	1422	5.65205	common
	M20-M25	K55-K64	NA	NA	NA	-9.24648	0.275394	8.03e-17	0.0783616	4279	5.45205	common
	I80-I89	M05-M14	NA	NA	NA	-4.77012	0.528903	0.00333434	0.0802243	1920	6.30137	common
	I10-I15	E65-E68	NA	NA	NA	-8.05027	0.307946	2.55e-12	0.0838232	3476	4.92603	common
	K50-K52	D50-D53	NA	NA	NA	-4.9181	0.502069	0.00164812	0.0846502	759	5.79178	common
	N30-N39	M05-M14	NA	NA	NA	-5.99771	0.411385	4.68e-06	0.0848077	1845	6.49315	female unique
	J40-J47	K40-K46	NA	NA	NA	-6.2544	0.383618	9.76e-07	0.0907815	2774	4.66849	female unique
	N30-N39	D50-D53	NA	NA	NA	-4.85817	0.490163	0.00220004	0.0924306	863	6.21918	common
	I10-I15	H30-H36	NA	NA	NA	-4.67659	0.507395	0.005138	0.0932118	1295	5	common
	K55-K64	E65-E68	NA	NA	NA	-6.3891	0.36635	4.18e-07	0.0962657	2274	5.59726	common
	I10-I15	M45-M49	NA	NA	NA	-8.52871	0.269492	4.81e-14	0.100417	2769	4.7589	common
	K40-K46	M05-M14	NA	NA	NA	-5.9934	0.382253	4.8e-06	0.101166	2055	5.84658	common
	N80-N98	I10-I15	NA	NA	NA	-8.74659	0.258253	7.29e-15	0.104472	9471	8.43014	female unique
	K00-K14	F30-F39	NA	NA	NA	-4.50057	0.496404	0.011406	0.107088	669	6.38082	common
	M20-M25	D50-D53	NA	NA	NA	-4.97605	0.447875	0.00123817	0.107674	894	5.56301	female unique
	L80-L99	M45-M49	NA	NA	NA	-4.37262	0.49991	0.0199902	0.112374	593	5.88493	female unique
	N30-N39	M20-M25	NA	NA	NA	-5.6865	0.383067	2.88e-05	0.113233	2235	5.83288	female unique
	J40-J47	M15-M19	NA	NA	NA	-7.48075	0.291099	2.15e-10	0.113309	3723	5.04384	female unique
	N80-N98	M70-M79	NA	NA	NA	-7.39909	0.294143	3.95e-10	0.113451	4760	7.57671	female unique
	K40-K46	M45-M49	NA	NA	NA	-5.61571	0.384395	4.29e-05	0.115481	1348	5.63836	common
	K20-K31	M05-M14	NA	NA	NA	-7.10607	0.301835	3.32e-09	0.117084	3466	5.92466	common
	K50-K52	K40-K46	NA	NA	NA	-4.7306	0.452238	0.00400938	0.117731	1734	5.46164	common
	K20-K31	E65-E68	NA	NA	NA	-6.19838	0.340959	1.38e-06	0.120827	2365	6.16164	common
	I80-I89	E65-E68	NA	NA	NA	-5.17025	0.408114	0.000465	0.121231	1279	6.45753	common
	M20-M25	M05-M14	NA	NA	NA	-5.84452	0.360768	1.16e-05	0.121418	2644	5.3863	common
	N30-N39	G50-G59	NA	NA	NA	-4.40727	0.478249	0.0172309	0.121509	1295	5.59452	female unique
	N30-N39	M45-M49	NA	NA	NA	-5.03693	0.417347	0.000914	0.122194	1344	6.18767	common
	D10-D36	M70-M79	NA	NA	NA	-5.68589	0.364857	2.89e-05	0.125615	2537	6.76986	female unique
	I10-I15	K40-K46	NA	NA	NA	-8.69303	0.234263	1.16e-14	0.130491	4607	4.10959	female unique
	N80-N98	G50-G59	NA	NA	NA	-4.69854	0.418047	0.00464843	0.140267	3244	7.31918	female unique
	I80-I89	M15-M19	NA	NA	NA	-5.95065	0.31633	6.21e-06	0.152229	3647	6.53425	common
	K40-K46	M15-M19	NA	NA	NA	-5.87858	0.319782	9.53e-06	0.152611	3705	5.7726	common
	N80-N98	K00-K14	NA	NA	NA	-4.4908	0.415287	0.0119136	0.154901	2344	7.13562	female unique
	I80-I89	M20-M25	NA	NA	NA	-4.4603	0.417839	0.0136436	0.1551	2518	5.80274	female unique
	I80-I89	K40-K46	NA	NA	NA	-5.34435	0.347153	0.000189	0.156405	2592	5.59178	female unique
	G50-G59	K40-K46	NA	NA	NA	-4.33829	0.426161	0.0231624	0.157425	1431	5.31781	female unique
	N80-N98	E65-E68	NA	NA	NA	-4.5992	0.395832	0.00733712	0.161943	2980	9.05342	female unique
	D10-D36	M20-M25	NA	NA	NA	-4.38376	0.397057	0.0191067	0.175415	3233	6.66575	female unique
	N80-N98	E00-E07	NA	NA	NA	-5.65005	0.307441	3.53e-05	0.176037	3820	8.15205	female unique
	N30-N39	M15-M19	NA	NA	NA	-6.03351	0.284841	3.77e-06	0.179319	3295	6.41096	female unique
	I10-I15	M15-M19	NA	NA	NA	-9.43575	0.181248	1.36e-17	0.180828	6819	4.44384	common
	K80-K87	M15-M19	NA	NA	NA	-5.17622	0.321999	0.000451	0.188862	2196	6.13699	female unique
	D10-D36	E65-E68	NA	NA	NA	-4.55868	0.332792	0.00879744	0.219349	1669	8.12603	common
	M20-M25	M45-M49	NA	NA	NA	-4.38029	0.328164	0.0193785	0.237532	1858	5.14521	common
	N80-N98	K20-K31	NA	NA	NA	-7.55753	0.188423	1.2e-10	0.240746	9576	7.56301	female unique
	N80-N98	M15-M19	NA	NA	NA	-6.90441	0.205098	1.36e-08	0.242663	8050	8.46438	female unique
	K20-K31	M15-M19	NA	NA	NA	-6.52177	0.212218	1.77e-07	0.250565	6254	6.16575	common
	N80-N98	K40-K46	NA	NA	NA	-5.38787	0.256102	0.00015	0.251618	5820	7.43014	female unique
	K50-K52	M15-M19	NA	NA	NA	-4.23767	0.314197	0.0354811	0.26409	2102	6.3137	female unique
	D10-D36	M15-M19	NA	NA	NA	-5.42543	0.238737	0.000122	0.27383	4573	7.57808	female unique
	N80-N98	M20-M25	NA	NA	NA	-4.37635	0.289127	0.019683	0.282149	5824	7.42466	female unique
	K55-K64	H25-H28	NA	NA	NA	-4.73918	0.222329	0.00385397	0.348661	3191	5.57534	female unique
	J40-J47	H25-H28	NA	NA	NA	-4.58101	0.229328	0.00796819	0.349744	2045	5.13973	female unique
	I10-I15	H25-H28	NA	NA	NA	-4.55992	0.170204	0.00875068	0.46019	4190	4.87534	common
	N80-N98	I80-I89	M50-M54	J95-J99	NA	NA	0	0	0.553211	8	17.311	female unique
	N60-N64	M70-M79	A00-A09	NA	NA	-4.78441	0.0235189	0.00311766	0.893576	30	13.0644	female unique
	N60-N64	J40-J47	D50-D53	NA	NA	NA	0	0	0.919983	26	13.7534	female unique
	N60-N64	M65-M68	NA	NA	NA	-8.74515	0.00511107	7.38e-15	0.956287	209	7.96712	female unique
	L60-L75	E10-E14	H25-H28	NA	NA	NA	0	0	0.96194	27	12.3562	female unique
	I80-I89	M70-M79	H40-H42	NA	NA	NA	0	0	0.965193	37	7.68219	female unique
	N60-N64	M20-M25	M80-M85	NA	NA	NA	0	0	0.96793	28	12.3192	female unique
	L60-L75	E10-E14	F40-F48	NA	NA	NA	0	0	0.978342	13	12.8466	female unique
	K50-K52	M65-M68	N17-N19	NA	NA	NA	0	0	0.987482	22	8.8726	female unique
	B95-B98	H25-H28	NA	NA	NA	-3.67498	0.418774	0.321595	1	732	5.48082	female unique
	C15-C26	J09-J18	NA	NA	NA	-0.0112521	1572.83	1	1	265	0.89863	common
	C43-C44	C76-C80	A00-A09	NA	NA	-4.14408	1.1285	0.0523704	1	24	6.45616	common
	C43-C44	C76-C80	J09-J18	NA	NA	-0.00660194	2597.87	1	1	28	6.58904	common
	C43-C44	C76-C80	J95-J99	NA	NA	-0.00372842	3058.39	1	1	18	7.25068	female unique
	C50-C50	C15-C26	D60-D64	NA	NA	-0.00592656	1942.87	1	1	29	7.25479	female unique
	C50-C50	D60-D64	A30-A49	NA	NA	-0.00491865	2798.92	1	1	46	7.93562	female unique
	C50-C50	E70-E90	A00-A09	NA	NA	-0.0053691	3300.8	1	1	58	9.47397	female unique
	C50-C50	I30-I52	N17-N19	NA	NA	-4.09552	1.63485	0.0636047	1	47	8.45753	female unique
	C50-C50	I80-I89	A30-A49	NA	NA	-0.00468065	4060.69	1	1	45	7.69315	female unique
	C50-C50	I80-I89	D70-D77	NA	NA	-0.00466572	3982.37	1	1	33	4.96712	female unique
	C50-C50	K00-K14	E70-E90	NA	NA	-0.00487235	3086.38	1	1	45	10.0521	female unique
	C50-C50	K40-K46	M80-M85	NA	NA	-1.02935	1.70385	1	1	59	8.0274	female unique
	C50-C50	K55-K64	D70-D77	NA	NA	-0.00692881	1997.57	1	1	54	5.9274	female unique
	C50-C50	K55-K64	D70-D77	J09-J18	NA	-0.00289791	3704.52	1	1	8	8.38356	female unique
	C50-C50	K55-K64	E70-E90	NA	NA	-0.00730057	2360.45	1	1	190	9.51507	female unique
	C50-C50	K55-K64	E70-E90	J95-J99	NA	-0.00173064	12163.6	1	1	6	11.9644	female unique
	C50-C50	K55-K64	E70-E90	N17-N19	NA	-0.00189537	4769.67	1	1	9	11.6712	female unique
	C50-C50	K55-K64	M80-M85	NA	NA	-3.57641	1.07818	0.458395	1	96	9.78082	female unique
	C50-C50	L00-L08	A00-A09	NA	NA	-0.004365	3391.91	1	1	34	9.32603	female unique
	C50-C50	L80-L99	A00-A09	NA	NA	-0.00413926	2885.76	1	1	38	9.83288	female unique
	C50-C50	M50-M54	J90-J94	NA	NA	-0.0052072	3061.15	1	1	30	5.26027	female unique
	C50-C50	M80-M85	A00-A09	NA	NA	-3.03238	0.921954	1	1	25	6.60274	female unique
	C50-C50	N30-N39	I95-I99	NA	NA	-0.00279496	5031.19	1	1	29	10.5562	female unique
	C50-C50	N30-N39	N17-N19	NA	NA	-0.00513427	3552.89	1	1	53	10.1014	female unique
	C51-C58	D60-D64	A30-A49	NA	NA	-0.00531682	2427.63	1	1	34	2.63288	female unique
	C51-C58	I26-I28	NA	NA	NA	-0.012251	1140.04	1	1	129	1.5589	female unique
	C51-C58	I70-I79	NA	NA	NA	-2.99244	1.44776	1	1	77	3.80822	female unique
	C51-C58	I95-I99	NA	NA	NA	-0.0086081	2082.64	1	1	124	2.33014	female unique
	C51-C58	J20-J22	NA	NA	NA	-0.00924181	1487.31	1	1	133	2.31233	female unique
	C51-C58	K70-K77	NA	NA	NA	-0.00616056	2239.88	1	1	68	3.06164	female unique
	C76-C80	L00-L08	NA	NA	NA	-0.0148799	933.713	1	1	354	1.16712	female unique
	D00-D09	D70-D77	NA	NA	NA	-4.05338	1.6493	0.075319	1	130	1.70959	female unique
	D10-D36	B95-B98	H25-H28	NA	NA	-1.4284	2.1864	1	1	87	11.4849	female unique
	D10-D36	C15-C26	A00-A09	NA	NA	-0.00377554	3688.8	1	1	57	7.98082	female unique
	D10-D36	C15-C26	A30-A49	NA	NA	-0.00574174	2132.31	1	1	49	6.84384	female unique
	D10-D36	C15-C26	D70-D77	NA	NA	-3.67098	1.0492	0.325948	1	44	4.15342	female unique
	D10-D36	C15-C26	I95-I99	NA	NA	-0.00582498	2978.21	1	1	33	7.66575	female unique
	D10-D36	C15-C26	J09-J18	NA	NA	-0.00510262	3196.34	1	1	37	8.12055	female unique
	D10-D36	C15-C26	J90-J94	NA	NA	-0.00451654	2313.24	1	1	34	9.02192	female unique
	D10-D36	C15-C26	J95-J99	NA	NA	-0.0038459	4228.85	1	1	26	8.34384	female unique
	D10-D36	C15-C26	K65-K67	NA	NA	-2.05889	2.95889	1	1	57	9.23288	female unique
	D10-D36	C15-C26	K90-K93	NA	NA	-0.00412501	4229.13	1	1	74	8.9589	female unique
	D10-D36	C76-C80	B95-B98	NA	NA	-0.00784274	1504.13	1	1	78	7.4726	female unique
	D10-D36	C76-C80	K90-K93	NA	NA	-0.00730683	1805.34	1	1	52	7.51781	female unique
	D10-D36	D37-D48	C76-C80	NA	NA	-0.00500201	2567.69	1	1	51	9.21096	female unique
	D10-D36	D37-D48	J09-J18	NA	NA	-0.00275434	7204.63	1	1	27	10.9151	female unique
	D10-D36	D37-D48	J90-J94	NA	NA	-0.00456507	2105.25	1	1	25	10.389	female unique
	D10-D36	D37-D48	N17-N19	NA	NA	-2.81111	1.75722	1	1	26	9.02877	female unique
	D10-D36	D60-D64	A00-A09	NA	NA	-0.00469098	2726.35	1	1	88	10.7521	female unique
	D10-D36	E65-E68	A00-A09	NA	NA	-0.00411346	6631.52	1	1	66	10.6219	female unique
	D10-D36	E65-E68	A30-A49	NA	NA	-3.5126	1.20699	0.571998	1	28	12.189	female unique
	D10-D36	E65-E68	J90-J94	NA	NA	-0.00360729	2891.83	1	1	29	9.90411	female unique
	D10-D36	E65-E68	N17-N19	NA	NA	-3.51759	1.67336	0.562209	1	76	10.0192	female unique
	D10-D36	K65-K67	A00-A09	NA	NA	-2.9131	0.950192	1	1	38	13.6164	female unique
	D10-D36	K70-K77	I95-I99	NA	NA	-0.00409826	6517.95	1	1	26	9.24521	female unique
	D10-D36	M15-M19	B95-B98	NA	NA	-2.91972	1.16963	1	1	153	11.2329	female unique
	D10-D36	M15-M19	D60-D64	A00-A09	NA	-0.00238055	4280.05	1	1	14	13.4986	female unique
	D10-D36	M20-M25	E65-E68	NA	NA	-2.25671	1.67577	1	1	197	11.5699	female unique
	D10-D36	M70-M79	E65-E68	NA	NA	-2.55938	1.91268	1	1	187	11.3945	female unique
	D10-D36	N30-N39	E65-E68	NA	NA	-2.75855	1.33958	1	1	158	11.326	female unique
	D10-D36	N30-N39	F10-F19	NA	NA	-2.28056	2.01259	1	1	116	10.3671	female unique
	D10-D36	N30-N39	F30-F39	NA	NA	-2.33345	1.77625	1	1	157	10.7973	female unique
	D10-D36	N30-N39	F40-F48	NA	NA	-2.66365	1.70035	1	1	126	11.9082	female unique
	D10-D36	N30-N39	G50-G59	NA	NA	-2.29196	1.12411	1	1	146	9.69726	female unique
	D10-D36	N30-N39	H25-H28	NA	NA	-1.31564	1.27719	1	1	157	11.6164	common
	D10-D36	N30-N39	I95-I99	NA	NA	-2.98701	1.03571	1	1	82	9.35342	female unique
	D10-D36	N30-N39	J20-J22	NA	NA	-0.00438366	4347.83	1	1	82	8.70274	female unique
	D10-D36	N30-N39	K90-K93	NA	NA	-3.1479	1.05627	1	1	118	10.3562	female unique
	D10-D36	N30-N39	L00-L08	NA	NA	-3.18025	1.38448	1	1	64	11.2342	female unique
	D10-D36	N30-N39	L80-L99	NA	NA	-3.35716	1.64326	0.967806	1	106	8.09589	female unique
	D10-D36	N30-N39	M15-M19	NA	NA	-2.57205	0.886007	1	1	352	10.5205	female unique
	D10-D36	N30-N39	M20-M25	NA	NA	-2.8052	0.994513	1	1	233	10.1151	female unique
	D10-D36	N30-N39	M40-M43	NA	NA	-0.285113	0.868067	1	1	53	10.0247	female unique
	D10-D36	N30-N39	M45-M49	NA	NA	-2.42334	1.4175	1	1	170	10.8082	female unique
	D10-D36	N30-N39	M70-M79	NA	NA	-2.04083	1.0122	1	1	191	10.2411	female unique
	D10-D36	N30-N39	N17-N19	NA	NA	-0.00600072	2965.8	1	1	144	10.6452	female unique
	D37-D48	C15-C26	C76-C80	NA	NA	-0.00539794	2375.32	1	1	51	1.5589	common
	D50-D53	C76-C80	J95-J99	NA	NA	-0.00370655	4762.9	1	1	21	2.87123	female unique
	E00-E07	D50-D53	N17-N19	NA	NA	-2.88788	1.85153	1	1	80	9.1	female unique
	E00-E07	K65-K67	NA	NA	NA	-3.59254	1.24277	0.433248	1	290	4.24795	common
	E10-E14	C76-C80	D60-D64	NA	NA	-0.00633116	1333.32	1	1	44	3.45616	common
	E10-E14	C76-C80	J09-J18	NA	NA	-0.00635048	2531.22	1	1	45	6.25479	common
	E10-E14	D50-D53	J95-J99	NA	NA	-0.00452703	4857.82	1	1	37	9.43288	female unique
	E10-E14	E65-E68	N17-N19	NA	NA	-3.82483	1.83613	0.183993	1	140	9.30822	common
	E10-E14	F40-F48	NA	NA	NA	-3.99279	0.924086	0.0954681	1	481	4.97808	common
	E10-E14	G50-G59	NA	NA	NA	-3.94331	0.398379	0.115885	1	774	4.93699	common
	E10-E14	G50-G59	H30-H36	NA	NA	-0.0011142	11506.2	1	1	75	10.1781	female unique
	E10-E14	H25-H28	NA	NA	NA	-2.34444	0.325318	1	1	1320	5.41233	common
	E10-E14	H25-H28	A00-A09	NA	NA	-0.00538156	3465.23	1	1	99	9.44932	common
	E10-E14	H30-H36	NA	NA	NA	-3.72224	0.541619	0.270917	1	759	6.28767	common
	E10-E14	H30-H36	A00-A09	NA	NA	-3.13428	2.05888	1	1	61	11	common
	E10-E14	H30-H36	J09-J18	NA	NA	-3.97086	1.97527	0.103838	1	63	12.0329	common
	E10-E14	H53-H54	NA	NA	NA	-3.11954	1.13989	1	1	256	5.40822	common
	E10-E14	I20-I25	H30-H36	NA	NA	-1.90697	1.15607	1	1	101	10.0712	female unique
	E10-E14	I20-I25	H30-H36	N17-N19	NA	1.07256	0.0734572	1	1	18	13.326	female unique
	E10-E14	L00-L08	A00-A09	NA	NA	-3.91458	1.19132	0.129775	1	58	8.41233	female unique
	E10-E14	L00-L08	N17-N19	NA	NA	-3.57394	1.96883	0.462073	1	80	10.3329	common
	E10-E14	L80-L99	N17-N19	NA	NA	-0.00469208	4658.51	1	1	80	10.4534	female unique
	E10-E14	M05-M14	N17-N19	NA	NA	-0.00452609	5412.54	1	1	158	10.4534	female unique
	E10-E14	M70-M79	H30-H36	NA	NA	-1.2499	2.16955	1	1	74	8.78219	female unique
	G50-G59	D50-D53	NA	NA	NA	-4.12305	1.03775	0.0568684	1	588	5.27945	common
	G50-G59	D50-D53	N17-N19	NA	NA	-2.46886	2.88401	1	1	59	9.05479	female unique
	G50-G59	E65-E68	NA	NA	NA	-3.92675	0.533576	0.123984	1	1069	6.2274	common
	G50-G59	E65-E68	N17-N19	NA	NA	-2.86322	2.53556	1	1	54	8.76027	common
	G50-G59	E70-E90	J95-J99	NA	NA	-3.98348	1.60351	0.0988123	1	59	8.9589	female unique
	G50-G59	E70-E90	N17-N19	NA	NA	-4.07855	1.36551	0.0681563	1	127	9.5726	female unique
	G50-G59	F10-F19	NA	NA	NA	-4.13112	1.03249	0.0550877	1	704	6.58767	female unique
	G50-G59	F30-F39	J09-J18	NA	NA	-0.00351175	6423.82	1	1	49	8.74521	female unique
	G50-G59	F30-F39	N17-N19	NA	NA	-3.06219	2.46322	1	1	58	9.36164	female unique
	G50-G59	G40-G47	NA	NA	NA	-4.01167	0.828697	0.0888687	1	629	5.44932	female unique
	G50-G59	G40-G47	I95-I99	NA	NA	-1.43813	2.64976	1	1	24	12.1411	female unique
	G50-G59	G40-G47	J09-J18	NA	NA	-2.82449	1.97049	1	1	42	7.67123	female unique
	G50-G59	H25-H28	NA	NA	NA	-0.915662	0.420157	1	1	1114	6.18767	common
	G50-G59	H30-H36	NA	NA	NA	-1.51983	1.41854	1	1	304	6.09315	female unique
	G50-G59	H53-H54	NA	NA	NA	-2.60275	0.641	1	1	226	5.25068	female unique
	G50-G59	H90-H95	NA	NA	NA	-2.02176	1.24327	1	1	272	5.55753	female unique
	G50-G59	I20-I25	H25-H28	NA	NA	-0.122145	0.660673	1	1	66	9.26164	female unique
	G50-G59	I20-I25	I95-I99	NA	NA	-1.36363	2.05467	1	1	32	11.1671	female unique
	G50-G59	I20-I25	J90-J94	NA	NA	-3.438	1.27301	0.738399	1	29	9.68219	female unique
	G50-G59	I20-I25	N17-N19	NA	NA	-2.7089	1.64975	1	1	68	10.8589	female unique
	G50-G59	I70-I79	NA	NA	NA	-3.80278	1.13246	0.199602	1	338	4.65479	female unique
	G50-G59	K40-K46	H25-H28	NA	NA	-0.788144	0.416815	1	1	104	9.40137	female unique
	G50-G59	K40-K46	I30-I52	NA	NA	-2.35661	1.4519	1	1	111	10.4384	female unique
	G50-G59	K40-K46	N17-N19	NA	NA	-3.5415	1.40427	0.518415	1	76	11.5096	female unique
	G50-G59	K55-K64	H25-H28	NA	NA	-2.23754	1.75615	1	1	159	9.72603	female unique
	G50-G59	K55-K64	I26-I28	NA	NA	-0.00468207	3169.4	1	1	40	9.3411	female unique
	G50-G59	K55-K64	I95-I99	NA	NA	-3.13892	2.0578	1	1	75	9.33151	female unique
	G50-G59	K55-K64	J90-J94	NA	NA	-0.00493096	2314.92	1	1	47	9.78082	female unique
	G50-G59	M05-M14	NA	NA	NA	-3.73972	0.406721	0.253678	1	1492	5.95342	female unique
	G50-G59	M05-M14	J09-J18	NA	NA	-4.1037	1.40912	0.0615579	1	78	8.33288	female unique
	G50-G59	M05-M14	J90-J94	NA	NA	-0.00376287	4190.76	1	1	33	8.47397	female unique
	G50-G59	M05-M14	N17-N19	NA	NA	-3.15688	2.21498	1	1	87	9.63288	female unique
	G50-G59	M15-M19	NA	NA	NA	-3.05084	0.30829	1	1	2696	5.66986	female unique
	G50-G59	M15-M19	H25-H28	NA	NA	-0.607987	1.2155	1	1	187	9.18356	female unique
	G50-G59	M15-M19	I26-I28	NA	NA	-2.89937	1.73364	1	1	43	8.85205	female unique
	G50-G59	M15-M19	I95-I99	NA	NA	-2.87908	1.59124	1	1	62	9.54658	female unique
	G50-G59	M15-M19	J90-J94	NA	NA	-3.73315	1.05848	0.260203	1	47	9.61918	female unique
	G50-G59	M15-M19	J95-J99	NA	NA	-0.00395075	4377.45	1	1	67	10.3808	female unique
	G50-G59	M15-M19	N17-N19	NA	NA	-3.61745	1.41039	0.396301	1	134	9.58082	female unique
	H00-H06	E70-E90	A00-A09	NA	NA	-3.23537	1.36421	1	1	44	10.0753	female unique
	H00-H06	E70-E90	N17-N19	NA	NA	-3.48128	1.35205	0.63824	1	56	10.7151	female unique
	H00-H06	F10-F19	NA	NA	NA	-2.86745	1.0088	1	1	312	6.77534	female unique
	H00-H06	F10-F19	J95-J99	NA	NA	-0.772891	0.440357	1	1	17	10.1753	female unique
	H00-H06	F30-F39	NA	NA	NA	-2.8301	1.12912	1	1	331	5.47945	female unique
	H00-H06	F40-F48	NA	NA	NA	-3.13516	0.870447	1	1	269	5.64384	female unique
	H00-H06	I60-I69	NA	NA	NA	-3.39405	2.21735	0.858771	1	153	5.24658	female unique
	H00-H06	J20-J22	NA	NA	NA	-3.48713	1.42681	0.627379	1	187	5.43562	common
	H00-H06	K70-K77	NA	NA	NA	-3.91705	1.17739	0.128632	1	122	6.99863	female unique
	H00-H06	M05-M14	NA	NA	NA	-3.11257	0.825969	1	1	577	5.28493	female unique
	H00-H06	M05-M14	J95-J99	NA	NA	-2.24591	2.35327	1	1	19	9.26849	female unique
	H00-H06	M15-M19	NA	NA	NA	-3.14858	0.858067	1	1	1005	5.89041	common
	H00-H06	M15-M19	J95-J99	NA	NA	-2.78992	1.65663	1	1	26	12.1671	female unique
	H00-H06	M45-M49	NA	NA	NA	-2.79097	0.531333	1	1	336	5.26712	common
	H00-H06	M80-M85	NA	NA	NA	-2.9834	1.253	1	1	327	6.22192	female unique
	H40-H42	I95-I99	NA	NA	NA	-0.00435361	8699.64	1	1	73	3.2274	female unique
	H53-H54	A00-A09	NA	NA	NA	-3.98332	1.61926	0.0988147	1	157	4.11233	common
	I10-I15	B95-B98	H25-H28	NA	NA	-2.68692	0.640456	1	1	194	8.49863	female unique
	I10-I15	C76-C80	D60-D64	NA	NA	-0.01366	848.455	1	1	161	5.22192	common
	I10-I15	C76-C80	D70-D77	NA	NA	-0.00682033	2206.93	1	1	141	3.87123	common
	I10-I15	C76-C80	I95-I99	NA	NA	-0.00710875	2635.7	1	1	74	6.10822	common
	I10-I15	C76-C80	J90-J94	NA	NA	-0.0118116	999.897	1	1	121	5.01644	female unique
	I10-I15	C76-C80	J95-J99	NA	NA	-0.0103625	1492.95	1	1	93	5.37534	female unique
	I10-I15	D50-D53	J95-J99	NA	NA	-4.11856	1.9663	0.0579118	1	82	7.19863	female unique
	I10-I15	E65-E68	A00-A09	NA	NA	-3.98682	1.32588	0.0976346	1	172	8.38493	common
	I10-I15	F10-F19	N17-N19	NA	NA	-0.0110965	1788.89	1	1	194	8.19315	common
	I10-I15	H30-H36	A00-A09	NA	NA	-3.68932	1.66947	0.305572	1	72	8.31233	female unique
	I10-I15	H30-H36	I95-I99	NA	NA	-0.00423788	4759.67	1	1	48	9.87123	common
	I10-I15	H30-H36	J09-J18	NA	NA	-0.00672017	3655.08	1	1	72	8.80959	common
	I10-I15	H30-H36	J90-J94	NA	NA	-0.00345673	5316.95	1	1	31	8.64658	common
	I10-I15	H30-H36	J95-J99	NA	NA	-3.45017	1.93843	0.708693	1	49	7.50137	female unique
	I10-I15	H30-H36	N17-N19	NA	NA	-0.00591965	5341.84	1	1	139	8.70685	common
	I10-I15	H53-H54	J09-J18	NA	NA	-0.00525918	2971.17	1	1	49	8.83288	common
	I10-I15	I30-I52	I95-I99	NA	NA	-0.0127287	1828.64	1	1	238	8.19589	female unique
	I10-I15	I60-I69	J09-J18	NA	NA	-0.00837289	2279.16	1	1	107	8.47397	common
	I10-I15	I70-I79	A30-A49	NA	NA	-0.00894149	1916.14	1	1	72	8.28493	female unique
	I10-I15	I80-I89	E70-E90	N17-N19	NA	-0.00512312	4413.82	1	1	43	10.6055	common
	I10-I15	I80-I89	I30-I52	N17-N19	NA	-0.00375682	4903.26	1	1	24	11.0247	female unique
	I10-I15	K20-K31	E70-E90	N17-N19	NA	-0.00501239	4774.78	1	1	88	11.2548	common
	I10-I15	K40-K46	E70-E90	N17-N19	NA	-2.55057	2.71234	1	1	57	11.1205	female unique
	I10-I15	K50-K52	E70-E90	N17-N19	NA	-0.00248917	9234.44	1	1	41	9.0137	female unique
	I10-I15	K55-K64	E70-E90	N17-N19	NA	-4.13777	1.97267	0.0536738	1	107	9.93425	female unique
	I10-I15	L00-L08	A00-A09	NA	NA	-0.00504321	3003.79	1	1	99	7.55342	common
	I10-I15	M15-M19	D50-D53	N17-N19	NA	-0.00338655	8466.25	1	1	40	10.1945	female unique
	I10-I15	M15-M19	H25-H28	NA	NA	-1.97466	0.481933	1	1	530	8.51644	female unique
	I10-I15	M15-M19	H25-H28	N17-N19	NA	-1.90156	3.92354	1	1	56	10.4822	female unique
	I10-I15	M15-M19	I30-I52	N17-N19	NA	-3.26907	1.40236	1	1	51	11.1836	female unique
	I10-I15	M45-M49	A00-A09	NA	NA	-3.44297	1.75079	0.725524	1	147	7.98082	common
	I10-I15	M45-M49	A30-A49	NA	NA	-0.00672357	3602.85	1	1	81	9.36712	common
	I20-I25	D50-D53	J95-J99	NA	NA	-0.00322125	6176.09	1	1	44	8.02603	female unique
	I20-I25	D50-D53	N17-N19	NA	NA	-0.00544344	4826.6	1	1	100	9.13425	female unique
	I20-I25	D60-D64	A00-A09	NA	NA	-0.00501783	4016.03	1	1	94	9.63562	common
	I20-I25	E65-E68	NA	NA	NA	-3.40995	0.393085	0.813472	1	1059	5.25205	common
	I20-I25	E65-E68	J90-J94	NA	NA	-0.00275991	7462.08	1	1	30	10.4534	female unique
	I20-I25	E65-E68	N17-N19	NA	NA	-3.06373	2.0026	1	1	109	10.6822	common
	I20-I25	H25-H28	NA	NA	NA	-2.85106	0.269567	1	1	1484	5.97397	common
	I20-I25	H25-H28	I95-I99	NA	NA	-3.54886	1.58779	0.505289	1	67	11.1753	common
	I20-I25	H25-H28	J09-J18	NA	NA	-3.85835	1.33955	0.161647	1	84	10.5562	common
	I20-I25	H25-H28	J90-J94	NA	NA	-0.00337413	4885.96	1	1	43	9.73151	common
	I20-I25	H25-H28	J95-J99	NA	NA	-3.27563	1.58216	1	1	51	9.31781	common
	I20-I25	H30-H36	NA	NA	NA	-2.44895	0.586436	1	1	428	5.79452	common
	I20-I25	H30-H36	N17-N19	NA	NA	-2.22096	3.01177	1	1	64	11.5644	common
	I20-I25	H53-H54	NA	NA	NA	-2.92401	0.651206	1	1	287	5.03836	common
	I20-I25	H90-H95	NA	NA	NA	-3.09116	1.71947	1	1	267	5.17808	common
	I20-I25	K65-K67	NA	NA	NA	-3.67457	1.60409	0.321876	1	211	5.47123	common
	I20-I25	M40-M43	NA	NA	NA	-2.73625	1.13149	1	1	260	5.8137	female unique
	I80-I89	E65-E68	J90-J94	NA	NA	-2.73712	2.00494	1	1	27	7.42192	female unique
	I80-I89	E65-E68	N17-N19	NA	NA	-3.36207	2.23807	0.95232	1	70	8.34384	common
	I80-I89	F30-F39	J09-J18	NA	NA	-0.00343855	5884.19	1	1	55	10.5507	female unique
	I80-I89	F30-F39	J95-J99	NA	NA	-3.02352	2.32057	1	1	43	8.55342	female unique
	I80-I89	F30-F39	N17-N19	NA	NA	-3.64342	1.43236	0.360239	1	60	8.56301	female unique
	I80-I89	H25-H28	NA	NA	NA	-2.1785	0.352344	1	1	1807	6.64384	female unique
	I80-I89	H25-H28	J09-J18	NA	NA	-3.53878	2.40577	0.523382	1	70	9.67945	female unique
	I80-I89	H90-H95	NA	NA	NA	-2.6519	1.69922	1	1	377	6.61644	common
	I80-I89	I30-I52	I95-I99	NA	NA	-0.00407137	5409.51	1	1	58	9.64795	common
	I80-I89	K40-K46	F10-F19	NA	NA	-1.56802	1.5035	1	1	116	10.6726	female unique
	I80-I89	K40-K46	H25-H28	NA	NA	0.332976	2.06038	1	1	163	10.3151	female unique
	I80-I89	K40-K46	I95-I99	NA	NA	-2.63211	2.28418	1	1	72	9.52466	female unique
	I80-I89	K40-K46	J90-J94	NA	NA	-0.00512606	3524.42	1	1	53	8.3726	female unique
	I80-I89	K40-K46	J95-J99	NA	NA	-3.75399	1.57913	0.24105	1	79	9.34247	female unique
	I80-I89	K40-K46	M80-M85	NA	NA	-1.60975	1.03865	1	1	129	10.1068	female unique
	I80-I89	K65-K67	NA	NA	NA	-3.71729	1.86844	0.275881	1	375	6.06301	common
	I80-I89	M05-M14	N17-N19	NA	NA	-0.00533469	4665.5	1	1	112	9.90411	female unique
	I80-I89	M15-M19	D50-D53	NA	NA	-2.34664	1.92153	1	1	132	10.274	female unique
	I80-I89	M15-M19	H25-H28	NA	NA	-0.809296	0.553472	1	1	240	10.5027	common
	I80-I89	M15-M19	J95-J99	NA	NA	-4.0053	0.957585	0.0910801	1	88	8.96438	common
	I80-I89	M20-M25	F10-F19	NA	NA	-1.27646	0.704963	1	1	82	10.2438	female unique
	I80-I89	M20-M25	I95-I99	NA	NA	-2.02789	1.25001	1	1	59	9.6411	female unique
	I80-I89	M20-M25	J09-J18	NA	NA	-3.18253	2.51553	1	1	87	10.2575	female unique
	I80-I89	M20-M25	J90-J94	NA	NA	-3.08207	1.27709	1	1	36	10.9658	female unique
	I80-I89	M20-M25	J95-J99	NA	NA	-0.00525971	3823.46	1	1	53	8.19452	female unique
	I80-I89	M20-M25	N17-N19	NA	NA	-3.46179	1.80979	0.682013	1	90	11.7384	female unique
	I80-I89	M40-M43	NA	NA	NA	-3.35352	1.0477	0.979041	1	376	6.73562	female unique
	I80-I89	M50-M54	F10-F19	NA	NA	-1.34517	1.72812	1	1	63	9.90411	female unique
	I80-I89	M50-M54	H25-H28	NA	NA	0.00188972	1999.6	1	1	86	8.73151	female unique
	I80-I89	M50-M54	J09-J18	NA	NA	-3.75454	1.85305	0.240693	1	70	9.63699	female unique
	I80-I89	M50-M54	J95-J99	NA	NA	-2.81937	2.18915	1	1	46	8.58219	female unique
	I80-I89	M50-M54	N17-N19	NA	NA	-0.0043355	6337.87	1	1	77	10.1616	female unique
	I80-I89	M70-M79	F10-F19	NA	NA	-0.0015197	36360	1	1	90	10.3096	female unique
	I80-I89	M70-M79	H25-H28	NA	NA	0.0725273	0.665832	1	1	116	9.91096	female unique
	I80-I89	M70-M79	I95-I99	NA	NA	-2.8273	2.31167	1	1	63	9.54521	common
	I80-I89	M70-M79	J90-J94	NA	NA	-3.16822	2.21816	1	1	44	10.1986	common
	I80-I89	M70-M79	J95-J99	NA	NA	-3.87362	1.42777	0.152698	1	76	8.40959	common
	J30-J39	D70-D77	NA	NA	NA	-0.00601972	1929.21	1	1	131	5.60822	common
	J30-J39	E65-E68	NA	NA	NA	-2.40363	1.6517	1	1	419	7.52877	common
	J30-J39	E65-E68	N17-N19	NA	NA	2.28434	0.0574423	1	1	19	9.67945	female unique
	J30-J39	E70-E90	N17-N19	NA	NA	-3.82786	1.74366	0.18213	1	62	10.1329	female unique
	J30-J39	F10-F19	NA	NA	NA	-3.43386	1.43762	0.748576	1	405	7.40822	common
	J30-J39	F30-F39	NA	NA	NA	-3.39167	1.17695	0.864183	1	522	7.30411	common
	J30-J39	F40-F48	NA	NA	NA	-3.39799	0.707908	0.847851	1	352	7.71096	common
	J30-J39	H00-H06	NA	NA	NA	-0.805813	0.478659	1	1	267	5.31233	female unique
	J30-J39	I30-I52	N17-N19	NA	NA	-0.00354445	5526.38	1	1	35	10.663	female unique
	J30-J39	I70-I79	NA	NA	NA	-2.40827	1.37019	1	1	176	5.8726	female unique
	J30-J39	I95-I99	NA	NA	NA	-3.8033	2.14847	0.199325	1	171	7.07397	female unique
	J30-J39	J09-J18	NA	NA	NA	-0.0136934	1397.86	1	1	315	6.60548	common
	J30-J39	K40-K46	NA	NA	NA	-2.73961	0.651131	1	1	871	6.87945	common
	J30-J39	K55-K64	N17-N19	NA	NA	-0.00395172	3642.84	1	1	63	10.7178	female unique
	J30-J39	K90-K93	NA	NA	NA	-3.2814	0.637288	1	1	358	7.27397	female unique
	J30-J39	L80-L99	NA	NA	NA	-3.88117	1.66079	0.148134	1	375	5.90137	common
	J30-J39	M05-M14	NA	NA	NA	-3.20354	0.877283	1	1	613	7.0411	common
	J30-J39	M15-M19	NA	NA	NA	-3.48194	0.615681	0.638027	1	1225	7.22466	common
	J30-J39	M15-M19	N17-N19	NA	NA	-0.00354828	6384.77	1	1	40	9.97945	female unique
	J30-J39	M20-M25	NA	NA	NA	-2.91355	1.72139	1	1	860	6.36849	common
	J30-J39	M40-M43	NA	NA	NA	-0.505506	1.70694	1	1	127	7.91233	female unique
	J30-J39	M45-M49	NA	NA	NA	-1.55638	1.66025	1	1	413	7.7589	common
	J30-J39	M50-M54	NA	NA	NA	-2.86544	0.795395	1	1	616	6.80274	common
	J30-J39	M65-M68	NA	NA	NA	0.0569381	1.47406	1	1	239	6.82192	common
	J30-J39	M70-M79	NA	NA	NA	-3.03876	1.10485	1	1	712	6.37808	common
	J30-J39	M80-M85	NA	NA	NA	-3.52262	0.916203	0.553369	1	415	7.22192	common
	J40-J47	C76-C80	D60-D64	NA	NA	-0.00827152	1389.63	1	1	70	5.1726	common
	J40-J47	C76-C80	J09-J18	NA	NA	-0.00998322	1666.89	1	1	96	5.17397	common
	J40-J47	D50-D53	A30-A49	NA	NA	-0.00483175	5333.73	1	1	43	7.16164	female unique
	J40-J47	E65-E68	A00-A09	NA	NA	-3.56593	1.39505	0.474973	1	101	8.9726	female unique
	J40-J47	E65-E68	A30-A49	NA	NA	-0.00621148	3357.84	1	1	67	8.31507	female unique
	J40-J47	E65-E68	J90-J94	NA	NA	-3.18858	1.60937	1	1	40	6.49452	female unique
	J40-J47	E65-E68	N17-N19	NA	NA	-3.90462	1.9283	0.134954	1	143	8.86027	common
	J40-J47	F30-F39	A30-A49	NA	NA	-0.00626324	2929.36	1	1	73	8.72603	female unique
	J40-J47	F30-F39	N17-N19	NA	NA	-4.0623	1.88655	0.0727891	1	123	9.44384	female unique
	J40-J47	H25-H28	I95-I99	NA	NA	-0.00415632	4721.95	1	1	63	9.11233	female unique
	J40-J47	H25-H28	J09-J18	NA	NA	-0.00599865	3429.59	1	1	135	9.02466	female unique
	J40-J47	H25-H28	J95-J99	NA	NA	-0.00700746	3030.03	1	1	91	8.60274	female unique
	J40-J47	H30-H36	NA	NA	NA	-3.56825	0.67044	0.471856	1	567	5.23562	female unique
	J40-J47	H30-H36	J09-J18	NA	NA	-0.00513403	5284.8	1	1	48	9.73562	female unique
	J40-J47	H30-H36	J95-J99	NA	NA	-0.00284776	9299.91	1	1	31	10.1096	female unique
	J40-J47	H30-H36	N17-N19	NA	NA	-3.41443	2.48359	0.801499	1	48	9.55342	female unique
	J40-J47	I30-I52	A00-A09	NA	NA	-0.00581207	2804.61	1	1	141	9.73973	female unique
	J40-J47	I60-I69	J09-J18	NA	NA	-3.75054	1.90027	0.24421	1	72	9.17123	female unique
	J40-J47	K40-K46	J20-J22	NA	NA	-3.74305	1.23738	0.250705	1	120	9.12329	female unique
	J40-J47	L00-L08	A00-A09	NA	NA	-3.52769	1.7072	0.544132	1	60	10.6082	female unique
	J40-J47	L00-L08	H25-H28	NA	NA	-1.63848	1.02863	1	1	73	9.69041	female unique
	J40-J47	M05-M14	D50-D53	NA	NA	-0.00487898	2594.38	1	1	136	8.18082	female unique
	J40-J47	M45-M49	A00-A09	NA	NA	-2.92455	2.24303	1	1	99	8.8137	female unique
	J40-J47	M45-M49	J09-J18	NA	NA	-0.00510532	3935.81	1	1	107	8.47945	female unique
	J40-J47	M45-M49	N17-N19	NA	NA	-3.80196	2.32294	0.200119	1	112	10.9027	female unique
	J40-J47	M70-M79	J20-J22	NA	NA	-3.61732	1.81424	0.396301	1	135	8.32603	female unique
	J40-J47	M80-M85	A30-A49	NA	NA	-3.89683	1.03077	0.139172	1	50	9.80959	female unique
	K00-K14	D50-D53	NA	NA	NA	-2.8321	0.763776	1	1	378	6.70959	common
	K00-K14	E65-E68	NA	NA	NA	-3.6504	0.800423	0.351641	1	580	6.30411	common
	K00-K14	E65-E68	N17-N19	NA	NA	-0.00293174	9789.76	1	1	36	8.73425	female unique
	K00-K14	F10-F19	NA	NA	NA	-3.02141	0.80351	1	1	541	7.36164	female unique
	K00-K14	M15-M19	NA	NA	NA	-3.94119	0.7584	0.116833	1	1388	6.3	female unique
	K00-K14	M15-M19	H25-H28	NA	NA	0.0014234	46585	1	1	89	9.29589	female unique
	K00-K14	M15-M19	N17-N19	NA	NA	-3.13936	2.22226	1	1	82	9.27397	female unique
	K00-K14	M40-M43	NA	NA	NA	-2.38916	1.78635	1	1	152	6.94932	female unique
	K00-K14	M45-M49	NA	NA	NA	-3.20298	0.708828	1	1	539	6.28219	common
	K20-K31	C15-C26	C76-C80	A30-A49	NA	-0.00515918	2177.5	1	1	21	7.05753	female unique
	K20-K31	C15-C26	D70-D77	NA	NA	-0.00556584	1944.79	1	1	61	3.81096	common
	K20-K31	C15-C26	I95-I99	NA	NA	-3.81571	1.42835	0.190242	1	39	5.70137	common
	K20-K31	C15-C26	J09-J18	NA	NA	-0.00578542	3553.32	1	1	54	6.12466	common
	K20-K31	C15-C26	J90-J94	NA	NA	-0.0080889	1730.5	1	1	50	5.18082	common
	K20-K31	C15-C26	J95-J99	NA	NA	-4.10005	1.93996	0.0624547	1	43	4.64384	common
	K20-K31	C15-C26	K65-K67	NA	NA	-0.00386369	4564.79	1	1	56	8.13014	common
	K20-K31	C76-C80	A00-A09	NA	NA	-0.00802321	1076.56	1	1	99	5.47123	common
	K20-K31	C76-C80	A30-A49	NA	NA	-0.0111611	1372.92	1	1	136	5.0137	common
	K20-K31	C76-C80	I26-I28	NA	NA	-0.00762332	1362.62	1	1	64	5.32466	common
	K20-K31	C76-C80	J09-J18	NA	NA	-0.00933434	1645.27	1	1	119	5.91781	common
	K20-K31	C76-C80	J20-J22	NA	NA	-0.00828847	1458.11	1	1	89	6.54521	common
	K20-K31	C76-C80	J90-J94	NA	NA	-0.0104382	1044.51	1	1	115	5.15068	female unique
	K20-K31	C76-C80	J95-J99	NA	NA	-0.0107488	1619.24	1	1	80	5.48082	female unique
	K20-K31	C76-C80	K90-K93	NA	NA	-0.00795469	1923.21	1	1	68	7.48219	female unique
	K20-K31	D37-D48	I95-I99	NA	NA	-3.21778	1.76097	1	1	29	5.72877	common
	K20-K31	D37-D48	J09-J18	NA	NA	-3.39085	1.62392	0.866082	1	35	7.46301	common
	K20-K31	D37-D48	J95-J99	NA	NA	-0.00397372	5685.69	1	1	32	5.7726	common
	K20-K31	E65-E68	A00-A09	NA	NA	-3.29455	1.46292	1	1	119	10.3452	female unique
	K20-K31	E65-E68	J90-J94	NA	NA	-3.89715	1.48146	0.139088	1	53	8.01918	female unique
	K20-K31	E65-E68	N17-N19	NA	NA	-4.12241	1.27954	0.0569888	1	147	11.0603	common
	K20-K31	F10-F19	I95-I99	NA	NA	-0.00543446	2520.58	1	1	58	7.90959	common
	K20-K31	F30-F39	J95-J99	NA	NA	-0.00708113	3393.13	1	1	95	10.6274	common
	K20-K31	F30-F39	N17-N19	NA	NA	-0.0059507	3690.62	1	1	137	10.0301	female unique
	K20-K31	H25-H28	NA	NA	NA	-2.99918	0.209153	1	1	3241	6.26575	common
	K20-K31	H25-H28	I95-I99	NA	NA	-0.00457101	5894.8	1	1	83	8.20548	female unique
	K20-K31	H25-H28	J90-J94	NA	NA	-0.00622395	2127.87	1	1	62	7.8726	common
	K20-K31	H40-H42	NA	NA	NA	-3.72104	0.683457	0.272007	1	679	7.11781	female unique
	K20-K31	H53-H54	J09-J18	NA	NA	-0.00454248	3146.26	1	1	38	7.66438	common
	K20-K31	K80-K87	C76-C80	NA	NA	-0.00810136	1606.03	1	1	126	7.77534	female unique
	K20-K31	K80-K87	C76-C80	A30-A49	NA	-0.00505666	2986.95	1	1	17	8.25205	female unique
	K20-K31	K80-K87	C76-C80	D70-D77	NA	-0.00308051	5471.68	1	1	17	8.25205	female unique
	K20-K31	K80-K87	C76-C80	N17-N19	NA	-0.00412279	3386.05	1	1	13	6.7863	female unique
	K20-K31	K80-K87	D50-D53	NA	NA	-2.5261	1.22033	1	1	149	10.0712	female unique
	K20-K31	K80-K87	H25-H28	NA	NA	-0.0795113	0.948951	1	1	216	9.63014	female unique
	K20-K31	K80-K87	M80-M85	NA	NA	-2.50537	1.07865	1	1	169	10.2027	female unique
	K20-K31	L00-L08	A00-A09	NA	NA	-0.00613919	2582.8	1	1	66	10.1055	female unique
	K20-K31	M05-M14	M40-M43	NA	NA	-1.9339	1.48262	1	1	106	10.5507	female unique
	K20-K31	M15-M19	M40-M43	NA	NA	-1.56377	1.03859	1	1	151	11.1945	female unique
	K20-K31	M45-M49	A00-A09	NA	NA	-3.20038	1.99286	1	1	148	9.62466	female unique
	K20-K31	M45-M49	J95-J99	NA	NA	-0.00681779	3187.97	1	1	78	10.037	female unique
	K20-K31	M50-M54	H25-H28	NA	NA	-1.88352	0.638196	1	1	215	10.4274	female unique
	K20-K31	M70-M79	K70-K77	NA	NA	-0.00510413	4017.59	1	1	91	9.6137	female unique
	K20-K31	M70-M79	M40-M43	NA	NA	-2.06138	1.05572	1	1	100	9.38082	female unique
	K20-K31	M80-M85	A00-A09	NA	NA	-3.86622	1.34284	0.156847	1	139	10.5014	female unique
	K40-K46	C76-C80	J09-J18	NA	NA	-0.00830085	1876.06	1	1	77	5.20822	common
	K40-K46	C76-C80	L00-L08	NA	NA	-0.0048398	2908.82	1	1	38	6.47671	female unique
	K40-K46	E65-E68	J90-J94	NA	NA	-3.597	1.65282	0.426212	1	45	7.72329	female unique
	K40-K46	E65-E68	N17-N19	NA	NA	-3.78045	1.24618	0.217602	1	102	9.70274	common
	K40-K46	F10-F19	J95-J99	NA	NA	-3.2799	2.2407	1	1	56	8.08904	common
	K40-K46	H25-H28	NA	NA	NA	-2.22897	0.256167	1	1	1886	6.05068	common
	K40-K46	H25-H28	I95-I99	NA	NA	-1.95091	1.84716	1	1	54	10.5205	female unique
	K40-K46	H25-H28	N17-N19	NA	NA	-3.32726	2.23891	1	1	106	11.237	common
	K40-K46	H40-H42	NA	NA	NA	-2.62561	0.689349	1	1	368	6.32877	female unique
	K40-K46	H53-H54	NA	NA	NA	-3.81862	0.560096	0.188286	1	363	5.9863	female unique
	K40-K46	H90-H95	NA	NA	NA	-3.21278	0.328117	1	1	409	5.93973	common
	K40-K46	I30-I52	I95-I99	NA	NA	-3.13045	2.48877	1	1	86	9.15479	common
	K40-K46	I30-I52	N17-N19	NA	NA	-4.12506	1.45272	0.0564105	1	147	9.14247	common
	K40-K46	I60-I69	J09-J18	NA	NA	-4.02186	1.82184	0.0853977	1	60	8.72466	common
	K40-K46	M05-M14	N17-N19	NA	NA	-3.65034	1.44986	0.351641	1	120	9.50137	female unique
	K40-K46	M15-M19	D50-D53	NA	NA	-2.93555	1.33651	1	1	198	9.45753	female unique
	K40-K46	M15-M19	D50-D53	N17-N19	NA	-1.25418	3.71498	1	1	24	12.7986	female unique
	K40-K46	M45-M49	N17-N19	NA	NA	-3.11241	1.9445	1	1	96	9.9	common
	K50-K52	D50-D53	J95-J99	NA	NA	-0.00486867	5284.38	1	1	48	8.32603	female unique
	K50-K52	D50-D53	N17-N19	NA	NA	-3.24946	2.68616	1	1	75	7.67945	female unique
	K50-K52	E65-E68	NA	NA	NA	-3.37408	0.745184	0.91543	1	788	6.57945	common
	K50-K52	E65-E68	N17-N19	NA	NA	-0.00348574	5289.84	1	1	50	9.66986	female unique
	K50-K52	F10-F19	J95-J99	NA	NA	-0.00494648	5128.83	1	1	57	9.21644	female unique
	K50-K52	F10-F19	N17-N19	NA	NA	-3.02658	1.52881	1	1	62	9.12877	common
	K50-K52	F30-F39	J09-J18	NA	NA	-0.00648464	3259.98	1	1	72	9.12603	female unique
	K50-K52	F30-F39	J95-J99	NA	NA	-0.0051529	4949.46	1	1	47	8.3589	female unique
	K50-K52	F30-F39	N17-N19	NA	NA	-0.00427232	4621.65	1	1	73	8.23288	female unique
	K50-K52	G40-G47	NA	NA	NA	-4.0869	0.484471	0.0658373	1	635	5.94795	female unique
	K50-K52	G40-G47	I95-I99	NA	NA	0.00139932	5779.33	1	1	26	7.24932	female unique
	K50-K52	G40-G47	J09-J18	NA	NA	-0.00307411	5199.75	1	1	38	10.7507	female unique
	K50-K52	G40-G47	N17-N19	NA	NA	-2.54999	1.99574	1	1	54	8.60822	female unique
	K50-K52	G50-G59	NA	NA	NA	-3.39276	0.500663	0.86144	1	787	5.98904	female unique
	K50-K52	G50-G59	I60-I69	NA	NA	-2.06723	1.95131	1	1	28	9.07397	female unique
	K50-K52	G50-G59	J20-J22	NA	NA	-0.00214189	7552.95	1	1	40	8.66027	female unique
	K50-K52	G50-G59	M05-M14	NA	NA	-1.32941	3.45098	1	1	85	9.57808	female unique
	K50-K52	G50-G59	M15-M19	NA	NA	-0.396174	1.21031	1	1	109	9.86575	female unique
	K50-K52	G50-G59	M80-M85	NA	NA	-0.00226728	1663.43	1	1	46	10.8041	female unique
	K50-K52	G50-G59	N17-N19	NA	NA	-1.93808	3.14659	1	1	46	8.13973	female unique
	K50-K52	H25-H28	NA	NA	NA	-2.80522	0.445285	1	1	1075	6.43288	female unique
	K50-K52	H25-H28	A00-A09	NA	NA	-0.00434999	4389.56	1	1	66	9.05479	female unique
	K50-K52	H25-H28	J09-J18	NA	NA	-0.00545147	3661.58	1	1	49	7.74247	female unique
	K50-K52	H25-H28	J90-J94	NA	NA	-0.00391568	3819	1	1	31	9.87945	female unique
	K50-K52	H25-H28	J95-J99	NA	NA	-3.68038	1.86751	0.315101	1	40	9.25342	female unique
	K50-K52	H53-H54	NA	NA	NA	-2.98035	1.0181	1	1	232	6.29863	common
	K50-K52	H53-H54	J09-J18	NA	NA	-1.47083	1.40911	1	1	15	11.2685	female unique
	K50-K52	H90-H95	NA	NA	NA	-3.22078	1.68554	1	1	257	6.27671	common
	K50-K52	I30-I52	I95-I99	NA	NA	-3.72249	2.04526	0.270851	1	70	7.84521	common
	K50-K52	I60-I69	J09-J18	NA	NA	-0.00316886	8899.44	1	1	43	10.7315	common
	K50-K52	J20-J22	J09-J18	NA	NA	-0.00694383	2526.65	1	1	81	7.89589	female unique
	K50-K52	K00-K14	NA	NA	NA	-4.11649	0.820453	0.058395	1	642	5.48767	female unique
	K50-K52	K00-K14	N17-N19	NA	NA	-0.00366641	3728.19	1	1	45	10.2027	female unique
	K50-K52	K40-K46	L00-L08	NA	NA	-0.00248933	6239.35	1	1	61	10.2027	female unique
	K50-K52	K40-K46	M05-M14	NA	NA	-2.05755	1.78541	1	1	176	9.23973	female unique
	K50-K52	K40-K46	M15-M19	NA	NA	-2.7897	0.757689	1	1	224	8.93562	female unique
	K50-K52	K40-K46	M40-M43	NA	NA	-1.51601	1.5083	1	1	21	10.8	female unique
	K50-K52	K40-K46	M80-M85	NA	NA	-3.32671	1.45028	1	1	138	10.2192	female unique
	K50-K52	K40-K46	N17-N19	NA	NA	-4.01397	1.74552	0.088186	1	99	10.4712	female unique
	K50-K52	K65-K67	NA	NA	NA	-3.94642	0.980687	0.114473	1	378	5.57671	common
	K50-K52	M05-M14	A00-A09	NA	NA	-3.18838	1.25828	1	1	114	9.71918	female unique
	K50-K52	M05-M14	N17-N19	NA	NA	-2.9761	2.14786	1	1	105	9.61918	female unique
	K50-K52	M15-M19	H25-H28	NA	NA	-1.01964	0.655036	1	1	163	9.69589	female unique
	K50-K52	M15-M19	N17-N19	NA	NA	-2.99599	2.41374	1	1	129	9.79726	female unique
	K50-K52	M20-M25	N17-N19	NA	NA	-2.6428	1.84231	1	1	82	10.8918	female unique
	K50-K52	M40-M43	NA	NA	NA	-0.724839	0.633542	1	1	236	6.17945	female unique
	K50-K52	M45-M49	NA	NA	NA	-3.61865	0.879985	0.394755	1	811	6.13699	common
	K50-K52	M45-M49	A00-A09	NA	NA	-0.0030684	5069.72	1	1	68	9.12603	female unique
	K50-K52	M45-M49	J09-J18	NA	NA	-3.23046	1.8562	1	1	47	8.56438	female unique
	K50-K52	M50-M54	H25-H28	NA	NA	-0.839106	1.02898	1	1	60	9.1726	female unique
	K50-K52	M50-M54	N17-N19	NA	NA	-3.81646	1.86965	0.189806	1	78	9.42877	female unique
	K50-K52	M65-M68	NA	NA	NA	-0.0701677	0.636338	1	1	382	5.41507	female unique
	K50-K52	M65-M68	J90-J94	NA	NA	-0.00185769	4335.69	1	1	10	11.1329	female unique
	K50-K52	M70-M79	N17-N19	NA	NA	-0.00512099	3592.12	1	1	86	9.62466	female unique
	K50-K52	M80-M85	A00-A09	NA	NA	-0.00460633	3119.68	1	1	87	11.3096	female unique
	K55-K64	F10-F19	I95-I99	NA	NA	-0.00624038	3263.46	1	1	64	6.56712	female unique
	K55-K64	F30-F39	J95-J99	NA	NA	-0.00753749	2657.29	1	1	95	8.31781	female unique
	K55-K64	H25-H28	J09-J18	NA	NA	-0.00876812	2482.14	1	1	123	9.03288	female unique
	K55-K64	H40-H42	NA	NA	NA	-3.48168	0.481514	0.638027	1	668	5.52877	female unique
	K65-K67	I60-I69	NA	NA	NA	-2.71662	3.05922	1	1	85	4.67397	female unique
	K80-K87	C76-C80	J09-J18	NA	NA	-0.00803417	1948.25	1	1	62	6.15479	female unique
	K80-K87	C76-C80	N17-N19	NA	NA	-0.00862621	1921.77	1	1	54	4.30137	female unique
	K80-K87	E65-E68	NA	NA	NA	-3.86034	0.377045	0.160446	1	1099	5.97808	female unique
	K80-K87	E65-E68	N17-N19	NA	NA	-2.88074	1.32888	1	1	70	10.8589	female unique
	K80-K87	F10-F19	N17-N19	NA	NA	-2.77817	1.30967	1	1	49	9.36438	female unique
	K80-K87	H53-H54	NA	NA	NA	-3.09954	0.895206	1	1	230	6.30411	female unique
	K80-K87	I30-I52	N17-N19	NA	NA	-3.47777	1.74133	0.646158	1	88	9.65479	female unique
	K80-K87	M05-M14	N17-N19	NA	NA	-0.00448824	3529.33	1	1	79	11.4438	female unique
	K80-K87	M15-M19	C76-C80	NA	NA	-0.00506614	2419.64	1	1	50	9.10274	female unique
	K80-K87	M15-M19	H25-H28	NA	NA	0.133457	2.16978	1	1	140	10.9164	female unique
	K80-K87	M15-M19	N17-N19	NA	NA	-4.01226	1.33076	0.0887684	1	120	11.2082	female unique
	K80-K87	M40-M43	NA	NA	NA	-3.03938	1.17107	1	1	207	6.10411	female unique
	K80-K87	M70-M79	N17-N19	NA	NA	-0.00478548	3570.54	1	1	84	11.9288	female unique
	L00-L08	H25-H28	NA	NA	NA	-2.67738	0.703827	1	1	418	6.04521	common
	L00-L08	M40-M43	NA	NA	NA	-2.44265	1.24295	1	1	120	5.90822	female unique
	L60-L75	E10-E14	A00-A09	NA	NA	-0.00256417	6250.62	1	1	25	13.2301	female unique
	L60-L75	E10-E14	N17-N19	NA	NA	-0.002916	9744.74	1	1	25	12.063	female unique
	L60-L75	E65-E68	NA	NA	NA	-2.04929	1.54748	1	1	358	8.67397	female unique
	L60-L75	E70-E90	A00-A09	NA	NA	-2.42521	1.50109	1	1	53	10.8384	female unique
	L60-L75	E70-E90	J95-J99	NA	NA	-2.03033	2.20794	1	1	23	10.0877	female unique
	L60-L75	E70-E90	N17-N19	NA	NA	-0.00363709	9633.98	1	1	46	11.9932	female unique
	L60-L75	F10-F19	NA	NA	NA	-3.71076	0.980307	0.282677	1	344	8.76438	common
	L60-L75	F40-F48	NA	NA	NA	-3.47732	0.857816	0.646735	1	242	8.0726	female unique
	L60-L75	G40-G47	NA	NA	NA	-2.28154	1.49623	1	1	259	6.11233	female unique
	L60-L75	G40-G47	N17-N19	NA	NA	-0.00207223	3914.76	1	1	16	11.8685	female unique
	L60-L75	K55-K64	E70-E90	NA	NA	-0.00409405	4936.95	1	1	128	11.1616	female unique
	L60-L75	K55-K64	E70-E90	N17-N19	NA	1.44617	0.0550149	1	1	12	13.0836	female unique
	L60-L75	M05-M14	NA	NA	NA	-2.80608	0.819928	1	1	505	7.74521	common
	L60-L75	M05-M14	A00-A09	NA	NA	-0.00266201	3831.12	1	1	19	10.0164	female unique
	L60-L75	M15-M19	NA	NA	NA	-2.18041	0.48854	1	1	931	7.33151	common
	L60-L75	M15-M19	A00-A09	NA	NA	-0.0033973	3533.6	1	1	43	10.4274	common
	L60-L75	M15-M19	D60-D64	NA	NA	-0.0029523	3796.26	1	1	36	10.4479	common
	L60-L75	M15-M19	H25-H28	NA	NA	0.00101091	9915.89	1	1	59	11.474	common
	L60-L75	M15-M19	I95-I99	NA	NA	-0.00165295	20249.3	1	1	22	10.6178	common
	L60-L75	M15-M19	J09-J18	NA	NA	-2.75866	2.27112	1	1	37	11.4137	common
	L60-L75	M15-M19	J95-J99	NA	NA	-1.86659	1.059	1	1	23	14.1479	female unique
	L60-L75	M15-M19	N17-N19	NA	NA	-0.00297016	6101.87	1	1	36	12.0342	common
	L60-L75	M20-M25	NA	NA	NA	-1.89641	1.13726	1	1	600	6.55068	female unique
	L60-L75	M20-M25	A00-A09	NA	NA	-0.00283789	4007.93	1	1	34	10.9726	female unique
	L60-L75	M45-M49	NA	NA	NA	-1.80862	0.957173	1	1	305	7.48219	female unique
	L60-L75	M50-M54	NA	NA	NA	-3.60177	1.09843	0.419096	1	418	6.99452	common
	L60-L75	M50-M54	A00-A09	NA	NA	-0.00171332	11266.4	1	1	22	10.9397	female unique
	L60-L75	M65-M68	NA	NA	NA	-0.644561	0.594806	1	1	203	5.33973	common
	L60-L75	M70-M79	NA	NA	NA	-2.76414	1.19377	1	1	522	6.27534	common
	L60-L75	M70-M79	A00-A09	NA	NA	-0.00337626	4755.08	1	1	34	10.6781	common
	L60-L75	M70-M79	D60-D64	NA	NA	-0.00281936	6751.67	1	1	27	10.6137	female unique
	L60-L75	M70-M79	H25-H28	NA	NA	0.14733	0.047345	1	1	23	9.02466	female unique
	L60-L75	M70-M79	I30-I52	NA	NA	-1.64571	4.04263	1	1	36	13.5014	female unique
	L60-L75	M70-M79	J09-J18	NA	NA	-0.00448133	3785.45	1	1	29	9.05753	common
	L60-L75	M70-M79	N17-N19	NA	NA	-2.28762	2.91153	1	1	24	12.5082	common
	L60-L75	M80-M85	NA	NA	NA	-2.71943	1.61973	1	1	277	7.28219	female unique
	L60-L75	N30-N39	A00-A09	NA	NA	-0.00314649	3719.28	1	1	34	10.0808	female unique
	L60-L75	N30-N39	H25-H28	NA	NA	0.00139544	5086.33	1	1	33	11.0712	female unique
	L60-L75	N30-N39	I30-I52	NA	NA	-0.00314989	7744.52	1	1	35	11.8137	female unique
	L60-L75	N30-N39	N17-N19	NA	NA	-0.0042703	6694.36	1	1	31	12.063	female unique
	L80-L99	D50-D53	NA	NA	NA	-3.74098	0.506225	0.252589	1	424	5.34795	female unique
	L80-L99	H25-H28	NA	NA	NA	-1.35619	0.509148	1	1	853	6.6274	female unique
	M05-M14	D50-D53	J95-J99	NA	NA	-3.02436	1.9189	1	1	39	6.71507	female unique
	M05-M14	D50-D53	N17-N19	NA	NA	-0.00488934	5665.47	1	1	86	7.67671	female unique
	M05-M14	M40-M43	NA	NA	NA	-2.96007	1.9611	1	1	435	4.89863	female unique
	M15-M19	B95-B98	H25-H28	NA	NA	-1.19539	1.14737	1	1	122	8.25205	female unique
	M15-M19	C76-C80	D60-D64	NA	NA	-0.00853508	1003.02	1	1	74	5.52192	common
	M15-M19	C76-C80	J20-J22	NA	NA	-0.00711924	1822.06	1	1	52	6.13014	common
	M15-M19	C76-C80	J90-J94	NA	NA	-0.00855813	1290.32	1	1	58	5.27945	female unique
	M15-M19	D50-D53	J95-J99	NA	NA	-0.00541765	4066.38	1	1	61	6.54521	female unique
	M15-M19	D50-D53	N17-N19	NA	NA	-3.62938	1.69622	0.379272	1	104	7.11644	female unique
	M15-M19	H25-H28	NA	NA	NA	-0.177697	0.229392	1	1	2748	4.60137	common
	M15-M19	H25-H28	J09-J18	NA	NA	-4.09301	1.26722	0.0642117	1	105	7.82192	common
	M15-M19	H25-H28	J90-J94	NA	NA	-0.0046659	3322.09	1	1	51	7.4	female unique
	M15-M19	H25-H28	J95-J99	NA	NA	-3.08412	1.9031	1	1	75	7.1589	common
	M15-M19	H25-H28	N17-N19	NA	NA	-3.14701	2.20827	1	1	151	7.89589	common
	M15-M19	I60-I69	J09-J18	NA	NA	-4.05505	1.15844	0.0748837	1	59	6.97808	female unique
	M15-M19	M40-M43	NA	NA	NA	-3.28038	0.484844	1	1	812	5.03836	female unique
	M20-M25	C15-C26	E70-E90	NA	NA	-0.00552038	3009.7	1	1	48	7.93014	female unique
	M20-M25	C76-C80	D60-D64	NA	NA	-0.00580836	1751.48	1	1	59	6.43014	female unique
	M20-M25	C76-C80	J09-J18	NA	NA	-0.00541943	2955.2	1	1	52	8.46575	female unique
	M20-M25	D50-D53	N17-N19	NA	NA	-3.39311	2.6626	0.861039	1	72	8.8	female unique
	M20-M25	E65-E68	NA	NA	NA	-3.9246	0.403416	0.125012	1	1645	5.70685	common
	M20-M25	E65-E68	N17-N19	NA	NA	-0.00476489	4638.63	1	1	89	8.66301	common
	M20-M25	E70-E90	J95-J99	NA	NA	-0.00682421	2869.01	1	1	89	10.3562	female unique
	M20-M25	F10-F19	J95-J99	NA	NA	-0.00489573	3263.1	1	1	47	10.1041	female unique
	M20-M25	F10-F19	N17-N19	NA	NA	-0.00380576	4579.7	1	1	55	8.90411	common
	M20-M25	F30-F39	J09-J18	NA	NA	-3.2845	1.39512	1	1	57	10.4712	female unique
	M20-M25	F30-F39	J95-J99	NA	NA	-0.00493625	4274.38	1	1	43	6.59726	female unique
	M20-M25	F30-F39	N17-N19	NA	NA	-0.0034451	7915.65	1	1	69	8.8274	female unique
	M20-M25	H90-H95	NA	NA	NA	-2.04469	0.867426	1	1	389	5.64384	common
	M20-M25	I30-I52	I95-I99	NA	NA	-0.00427953	5470.13	1	1	72	10.3466	female unique
	M20-M25	K40-K46	NA	NA	NA	-2.87671	0.356681	1	1	2560	5.15205	female unique
	M20-M25	K40-K46	H25-H28	NA	NA	-1.2997	0.373578	1	1	132	9.87671	female unique
	M20-M25	K40-K46	H40-H42	NA	NA	-1.42322	2.78952	1	1	37	11.7452	female unique
	M20-M25	K40-K46	J90-J94	NA	NA	-0.00365719	3803.04	1	1	43	11.0767	female unique
	M20-M25	K40-K46	N17-N19	NA	NA	-3.73127	0.940949	0.261964	1	116	10.7425	female unique
	M20-M25	K55-K64	K70-K77	NA	NA	-2.84896	2.55906	1	1	88	9.0411	female unique
	M20-M25	K55-K64	M40-M43	NA	NA	-2.14087	1.29492	1	1	92	9.41644	female unique
	M20-M25	K55-K64	M45-M49	NA	NA	-1.86987	1.12331	1	1	262	8.83562	female unique
	M20-M25	K55-K64	M80-M85	NA	NA	-2.04935	1.93051	1	1	217	10.0877	female unique
	M20-M25	L00-L08	N17-N19	NA	NA	-0.00559354	4377.67	1	1	60	8.55342	female unique
	M20-M25	M05-M14	D70-D77	NA	NA	-0.00452721	3685.83	1	1	36	9.33836	female unique
	M20-M25	M05-M14	J90-J94	NA	NA	-0.00548328	2956.75	1	1	51	10.8521	common
	M20-M25	M05-M14	N17-N19	NA	NA	-4.06689	2.19645	0.0715134	1	131	9.16712	female unique
	M20-M25	M40-M43	NA	NA	NA	-3.47116	0.826109	0.659687	1	621	6.02466	female unique
	M20-M25	M45-M49	J90-J94	NA	NA	-3.43548	1.66616	0.744694	1	47	9.44384	female unique
	M20-M25	M45-M49	N17-N19	NA	NA	-4.15302	1.64607	0.0504964	1	107	9.15342	common
	M50-M54	D50-D53	J95-J99	NA	NA	-3.2052	1.53327	1	1	35	8.67945	female unique
	M50-M54	D50-D53	N17-N19	NA	NA	-0.00423137	7980.48	1	1	69	7.68493	female unique
	M50-M54	E65-E68	NA	NA	NA	-4.13785	0.527764	0.0536738	1	1142	5.63973	common
	M50-M54	E65-E68	N17-N19	NA	NA	-2.93098	2.07351	1	1	83	8.89041	female unique
	M50-M54	F10-F19	J95-J99	NA	NA	-3.97468	1.38504	0.102327	1	52	7.10959	female unique
	M50-M54	F10-F19	N17-N19	NA	NA	-0.00415899	4572.78	1	1	63	7.93425	female unique
	M50-M54	F30-F39	J09-J18	NA	NA	-4.14406	1.2036	0.0523704	1	67	8.8411	female unique
	M50-M54	F30-F39	J95-J99	NA	NA	-0.00512192	3766.92	1	1	51	8.52603	female unique
	M50-M54	F30-F39	N17-N19	NA	NA	-0.00434189	4444.83	1	1	78	8.62055	female unique
	M50-M54	H25-H28	NA	NA	NA	-2.10859	0.39643	1	1	1085	5.8411	female unique
	M50-M54	H25-H28	N17-N19	NA	NA	-2.31166	1.88304	1	1	72	10.1027	female unique
	M50-M54	I60-I69	J09-J18	NA	NA	-0.00299444	6303.01	1	1	32	8.54384	common
	M65-M68	E70-E90	A00-A09	NA	NA	-0.00358105	3453.55	1	1	47	9.29589	female unique
	M65-M68	E70-E90	N17-N19	NA	NA	-2.98495	1.82404	1	1	61	10.5616	female unique
	M65-M68	F10-F19	NA	NA	NA	-2.13151	1.00115	1	1	300	6.71918	female unique
	M65-M68	F30-F39	NA	NA	NA	-3.01181	1.29655	1	1	393	5.97808	female unique
	M65-M68	F40-F48	NA	NA	NA	-3.36885	1.3213	0.930697	1	260	6.40685	female unique
	M65-M68	G90-G99	NA	NA	NA	-2.89508	2.19494	1	1	111	5.31507	female unique
	M65-M68	H90-H95	NA	NA	NA	-0.928189	0.770776	1	1	122	5.83014	common
	M65-M68	M40-M43	NA	NA	NA	0.00115018	15209.4	1	1	167	6.35342	female unique
	M65-M68	M45-M49	NA	NA	NA	-2.96884	0.741684	1	1	479	5.2411	female unique
	M65-M68	M45-M49	A00-A09	NA	NA	-0.00106646	2492.95	1	1	33	9.78356	female unique
	M65-M68	M45-M49	N17-N19	NA	NA	-1.7604	1.15109	1	1	28	10.8068	female unique
	M70-M79	D50-D53	N17-N19	NA	NA	-0.00400056	6458.14	1	1	61	9.83836	female unique
	M70-M79	E65-E68	N17-N19	NA	NA	-0.00492514	4151.67	1	1	90	8.96575	common
	M70-M79	F10-F19	J95-J99	NA	NA	-2.89624	1.98525	1	1	55	8.51233	female unique
	M70-M79	F10-F19	N17-N19	NA	NA	-3.11129	1.66372	1	1	60	9.71233	common
	M70-M79	H25-H28	NA	NA	NA	-2.1241	0.316993	1	1	1436	5.64521	female unique
	M70-M79	H25-H28	J09-J18	NA	NA	-0.00353249	6312.77	1	1	52	9.63425	female unique
	M70-M79	H25-H28	N17-N19	NA	NA	-3.97685	1.62213	0.10147	1	93	9.13973	female unique
	M70-M79	H30-H36	NA	NA	NA	-2.46866	0.543346	1	1	425	5.68219	female unique
	M70-M79	H40-H42	NA	NA	NA	-1.96447	0.919989	1	1	295	5.67397	female unique
	M70-M79	H90-H95	NA	NA	NA	-2.854	2.21552	1	1	342	5.46575	common
	M70-M79	I30-I52	I95-I99	NA	NA	-0.00730002	2838.52	1	1	75	9.6411	female unique
	M70-M79	I60-I69	J09-J18	NA	NA	-0.0051534	3185.62	1	1	43	9.26575	common
	M70-M79	M40-M43	NA	NA	NA	-2.96399	0.726959	1	1	522	5.20274	female unique
	M70-M79	M40-M43	N17-N19	NA	NA	-3.00605	1.81247	1	1	40	7.88493	female unique
	N10-N16	F40-F48	NA	NA	NA	-3.68896	1.12717	0.305779	1	128	4.1137	female unique
	N20-N23	A00-A09	NA	NA	NA	-3.58846	1.64272	0.439421	1	144	7.98082	common
	N20-N23	D50-D53	NA	NA	NA	-1.32681	2.47834	1	1	107	5.82466	female unique
	N20-N23	E65-E68	NA	NA	NA	-1.66609	0.563747	1	1	191	6.14521	common
	N20-N23	E70-E90	NA	NA	NA	-3.99498	1.58418	0.0947857	1	381	5.42192	common
	N20-N23	F10-F19	NA	NA	NA	-1.74904	0.728918	1	1	141	7.12877	female unique
	N20-N23	I26-I28	NA	NA	NA	-2.70082	1.7317	1	1	41	6.18904	female unique
	N20-N23	J95-J99	NA	NA	NA	-0.00436324	4719.89	1	1	78	6.15616	common
	N20-N23	K90-K93	NA	NA	NA	-3.07864	1.25615	1	1	136	5.9726	common
	N20-N23	M45-M49	NA	NA	NA	-1.51041	2.05714	1	1	142	6.71233	common
	N20-N23	M80-M85	NA	NA	NA	-1.74472	1.44695	1	1	136	6.76301	female unique
	N30-N39	G50-G59	H25-H28	NA	NA	-0.0279464	2.8979	1	1	109	11.5562	female unique
	N30-N39	G50-G59	I95-I99	NA	NA	-0.00280607	1704.44	1	1	45	13.989	female unique
	N30-N39	G50-G59	J09-J18	NA	NA	-0.00688171	2467.81	1	1	81	9.83836	female unique
	N30-N39	G50-G59	J90-J94	NA	NA	-0.00373093	3384	1	1	30	11.4493	female unique
	N30-N39	G50-G59	J95-J99	NA	NA	-3.27882	1.8386	1	1	47	10.4795	female unique
	N30-N39	G50-G59	M05-M14	NA	NA	-0.914233	0.790869	1	1	148	10.3603	female unique
	N30-N39	G50-G59	N17-N19	NA	NA	-3.5247	2.22945	0.549873	1	88	11.5164	female unique
	N30-N39	H25-H28	NA	NA	NA	-2.94565	0.320577	1	1	1665	6.96712	common
	N30-N39	H30-H36	NA	NA	NA	-2.46084	0.508276	1	1	465	6.16438	female unique
	N30-N39	H40-H42	NA	NA	NA	-1.88669	0.694554	1	1	326	6.7	female unique
	N30-N39	H90-H95	NA	NA	NA	-4.03325	0.70686	0.0816908	1	387	6.73699	common
	N30-N39	K40-K46	M45-M49	NA	NA	-0.930512	0.895991	1	1	135	9.84384	female unique
	N30-N39	K40-K46	N17-N19	NA	NA	-3.68663	1.05798	0.308372	1	148	10.7397	female unique
	N30-N39	M05-M14	N17-N19	NA	NA	-0.00603294	4245.8	1	1	138	9.8863	female unique
	N30-N39	M20-M25	H25-H28	NA	NA	-0.40007	0.922424	1	1	159	10.8548	female unique
	N30-N39	M20-M25	J90-J94	NA	NA	-0.00386416	3978.5	1	1	49	9.50959	female unique
	N30-N39	M20-M25	M45-M49	NA	NA	-2.13613	1.22326	1	1	191	9.72329	female unique
	N30-N39	M40-M43	NA	NA	NA	-3.95197	0.829736	0.11208	1	428	6.16438	female unique
	N30-N39	M45-M49	N17-N19	NA	NA	-3.02963	1.99203	1	1	92	10.5493	female unique
	N30-N39	M65-M68	NA	NA	NA	-1.404	1.95207	1	1	623	6.42192	female unique
	N30-N39	M65-M68	A00-A09	NA	NA	-1.31272	0.705329	1	1	36	8.63836	female unique
	N30-N39	M65-M68	J09-J18	NA	NA	-2.31207	1.58397	1	1	23	10.4904	female unique
	N60-N64	B95-B98	NA	NA	NA	-0.0088131	1589.59	1	1	284	7.86849	female unique
	N60-N64	C76-C80	A00-A09	NA	NA	-0.0033324	2627.27	1	1	20	10.3479	female unique
	N60-N64	C76-C80	D70-D77	NA	NA	-0.00334069	2551.15	1	1	34	5.57808	female unique
	N60-N64	C76-C80	J20-J22	NA	NA	-0.00565691	2838.08	1	1	29	8.6137	female unique
	N60-N64	C76-C80	J90-J94	NA	NA	-0.00515778	2656.14	1	1	23	9.85753	female unique
	N60-N64	C76-C80	N17-N19	NA	NA	-0.00392167	5114.76	1	1	24	12.7205	female unique
	N60-N64	D70-D77	NA	NA	NA	-3.79232	0.803624	0.207752	1	158	4.82877	female unique
	N60-N64	E65-E68	NA	NA	NA	-2.39305	1.39887	1	1	302	8.83836	female unique
	N60-N64	F10-F19	NA	NA	NA	-2.09502	0.564013	1	1	300	10.6918	female unique
	N60-N64	F30-F39	NA	NA	NA	-2.73431	1.13521	1	1	382	8.12603	female unique
	N60-N64	F30-F39	A00-A09	NA	NA	-0.00247357	3079.42	1	1	28	10.4726	female unique
	N60-N64	F30-F39	J09-J18	NA	NA	-0.00374325	3781.64	1	1	25	10.7863	female unique
	N60-N64	F30-F39	N17-N19	NA	NA	-0.00248537	10300.1	1	1	18	11.6479	female unique
	N60-N64	F40-F48	NA	NA	NA	-3.51417	0.837275	0.569062	1	279	10.3315	female unique
	N60-N64	G40-G47	NA	NA	NA	-2.62081	0.874146	1	1	254	8.14521	female unique
	N60-N64	I95-I99	NA	NA	NA	-3.91315	2.00085	0.130366	1	164	8.38082	female unique
	N60-N64	J40-J47	NA	NA	NA	-3.23436	1.13037	1	1	576	8.38082	female unique
	N60-N64	J40-J47	E70-E90	NA	NA	-1.59222	1.86721	1	1	55	11.411	female unique
	N60-N64	J40-J47	H25-H28	NA	NA	-0.00140468	1728.39	1	1	41	10.8137	female unique
	N60-N64	J40-J47	I30-I52	NA	NA	-0.00232586	8970.9	1	1	42	12.6192	female unique
	N60-N64	J40-J47	J09-J18	NA	NA	-0.00276731	8054.44	1	1	26	11.1877	female unique
	N60-N64	J40-J47	J95-J99	NA	NA	-0.00177595	14119.8	1	1	14	9.4	female unique
	N60-N64	J40-J47	M05-M14	NA	NA	-1.41893	0.0193383	1	1	53	11.737	female unique
	N60-N64	J40-J47	N17-N19	NA	NA	-1.73683	1.87686	1	1	27	13.4685	female unique
	N60-N64	J95-J99	NA	NA	NA	-0.00600448	3640.5	1	1	140	8.1137	female unique
	N60-N64	K20-K31	NA	NA	NA	-3.659	0.634333	0.341058	1	1025	7.66575	female unique
	N60-N64	K20-K31	K90-K93	NA	NA	-0.00404756	5840.95	1	1	57	12.1616	female unique
	N60-N64	K20-K31	M70-M79	NA	NA	-0.754021	1.89889	1	1	84	11.7014	female unique
	N60-N64	K90-K93	NA	NA	NA	-3.6826	1.44391	0.31259	1	287	8.05205	female unique
	N60-N64	L60-L75	NA	NA	NA	-3.28061	0.012949	1	1	173	5.24658	female unique
	N60-N64	L80-L99	NA	NA	NA	-2.94659	1.52263	1	1	400	4.7137	female unique
	N60-N64	L80-L99	A00-A09	NA	NA	-0.00240579	7976.46	1	1	23	12.8411	female unique
	N60-N64	M20-M25	NA	NA	NA	-2.10931	0.578016	1	1	660	7.75205	female unique
	N60-N64	M20-M25	F10-F19	NA	NA	0.00117796	22659.9	1	1	36	11.9521	female unique
	N60-N64	M20-M25	F40-F48	NA	NA	-0.616965	1.66891	1	1	40	12.7753	female unique
	N60-N64	M50-M54	NA	NA	NA	-3.44339	0.95103	0.725311	1	407	7.43562	female unique
	N60-N64	M50-M54	H25-H28	NA	NA	-1.39519	2.69137	1	1	26	12.4986	female unique
	N60-N64	M70-M79	NA	NA	NA	-2.89365	1.39258	1	1	581	7.25205	female unique
	N60-N64	M70-M79	H25-H28	NA	NA	-0.593804	0.962656	1	1	43	10.2219	female unique
	N60-N64	M70-M79	N17-N19	NA	NA	-0.00232002	13409.5	1	1	26	13.9151	female unique
	N60-N64	M80-M85	NA	NA	NA	-2.52021	0.869892	1	1	306	9.32877	female unique
	N70-N77	D50-D53	NA	NA	NA	-2.88966	1.63097	1	1	265	7.88219	female unique
	N70-N77	E65-E68	NA	NA	NA	-2.63078	0.625816	1	1	427	8.86027	female unique
	N70-N77	F10-F19	NA	NA	NA	-1.93091	2.90097	1	1	389	9.03288	female unique
	N70-N77	F30-F39	NA	NA	NA	-3.08559	1.28549	1	1	485	8.5726	female unique
	N70-N77	F40-F48	NA	NA	NA	-2.48459	1.6975	1	1	314	9.03425	female unique
	N70-N77	G40-G47	NA	NA	NA	-2.24356	1.97714	1	1	303	7.17808	female unique
	N70-N77	G50-G59	NA	NA	NA	-1.50844	1.41847	1	1	465	7.07123	female unique
	N70-N77	G50-G59	K55-K64	NA	NA	-0.00166808	22972.4	1	1	67	12.1178	female unique
	N70-N77	G90-G99	NA	NA	NA	-3.61373	1.99208	0.401426	1	117	5.78082	female unique
	N70-N77	I95-I99	NA	NA	NA	-3.69242	2.08483	0.302545	1	145	8.33699	female unique
	N70-N77	J09-J18	NA	NA	NA	-0.00791332	2964.08	1	1	241	7.26849	female unique
	N70-N77	J20-J22	NA	NA	NA	-3.47632	0.881907	0.64865	1	170	5.54521	female unique
	N70-N77	J30-J39	E70-E90	NA	NA	-0.00154226	9318.56	1	1	21	12.1205	female unique
	N70-N77	J30-J39	M15-M19	NA	NA	-0.751957	2.99868	1	1	39	11.2274	female unique
	N70-N77	K00-K14	NA	NA	NA	-1.93357	2.15805	1	1	358	6.86849	female unique
	N70-N77	K00-K14	M15-M19	NA	NA	-1.06387	1.45952	1	1	38	11.8466	female unique
	N70-N77	K55-K64	E70-E90	NA	NA	-3.51917	1.35964	0.559742	1	125	10.1507	female unique
	N70-N77	K55-K64	N17-N19	NA	NA	-0.00399378	4874.88	1	1	59	10.2822	female unique
	N70-N77	K70-K77	NA	NA	NA	-3.24027	1.34235	1	1	156	7.6589	female unique
	N70-N77	K90-K93	NA	NA	NA	-3.02505	1.21296	1	1	344	6.98767	female unique
	N70-N77	L00-L08	NA	NA	NA	-2.99123	1.40112	1	1	233	5.91507	female unique
	N70-N77	L80-L99	NA	NA	NA	-3.09704	2.05749	1	1	342	6.35068	female unique
	N70-N77	M20-M25	NA	NA	NA	-1.70744	1.80676	1	1	763	7.42466	female unique
	N70-N77	M20-M25	K55-K64	NA	NA	-0.818639	4.43135	1	1	80	12.1123	female unique
	N70-N77	M50-M54	NA	NA	NA	-1.14569	1.02613	1	1	571	6.8274	female unique
	N70-N77	M70-M79	NA	NA	NA	-2.61012	1.78396	1	1	669	7.75068	female unique
	N70-N77	M70-M79	M40-M43	NA	NA	-0.00198653	7243.55	1	1	19	14.4055	female unique
	N70-N77	N10-N16	NA	NA	NA	-4.06663	1.00794	0.0715476	1	111	4.69041	female unique
	N80-N98	C51-C58	A00-A09	NA	NA	-0.00617158	2093.22	1	1	71	9.24932	female unique
	N80-N98	C51-C58	A30-A49	NA	NA	-0.00565936	2925.97	1	1	59	5.21644	female unique
	N80-N98	C51-C58	D70-D77	NA	NA	-0.00661217	1718.76	1	1	60	5.23562	female unique
	N80-N98	C51-C58	E70-E90	NA	NA	-0.00634852	2394.14	1	1	144	7.09178	female unique
	N80-N98	C51-C58	I26-I28	NA	NA	-0.00418376	3552.53	1	1	33	8.45205	female unique
	N80-N98	C51-C58	I30-I52	NA	NA	-0.00655566	2680.92	1	1	74	7.98219	female unique
	N80-N98	C51-C58	I95-I99	NA	NA	-0.00525305	4728.36	1	1	45	9.99726	female unique
	N80-N98	C51-C58	J09-J18	NA	NA	-0.00708073	1951.48	1	1	59	8.76438	female unique
	N80-N98	C51-C58	J20-J22	NA	NA	-0.00331592	5387.19	1	1	41	10.0082	female unique
	N80-N98	C51-C58	J95-J99	NA	NA	-0.00434429	3973.12	1	1	32	6.24521	female unique
	N80-N98	C51-C58	K50-K52	NA	NA	-2.30656	1.33609	1	1	60	7.34658	female unique
	N80-N98	C51-C58	K90-K93	NA	NA	-3.12964	1.34172	1	1	52	9.6863	female unique
	N80-N98	C51-C58	L00-L08	NA	NA	-0.00263541	3607.64	1	1	36	6.25753	female unique
	N80-N98	C51-C58	N17-N19	NA	NA	-0.00581895	2779.47	1	1	71	7.18082	female unique
	N80-N98	C51-C58	N30-N39	NA	NA	-4.10226	0.970102	0.0619031	1	114	5.56438	female unique
	N80-N98	D50-D53	A30-A49	NA	NA	-3.07638	2.77736	1	1	47	11.7342	female unique
	N80-N98	D50-D53	C76-C80	NA	NA	-0.00538306	2407.38	1	1	63	9.71507	female unique
	N80-N98	D50-D53	J95-J99	NA	NA	-3.38767	1.74978	0.874769	1	57	12.4849	female unique
	N80-N98	D50-D53	N17-N19	NA	NA	-3.53577	1.93153	0.528571	1	100	12.4219	female unique
	N80-N98	D60-D64	A00-A09	NA	NA	-4.0275	0.972632	0.0834871	1	142	12.3384	female unique
	N80-N98	E00-E07	D60-D64	NA	NA	-0.00724933	1920.74	1	1	178	11.3356	female unique
	N80-N98	E00-E07	E65-E68	NA	NA	-2.79458	0.537676	1	1	204	12.6589	female unique
	N80-N98	E00-E07	E65-E68	N17-N19	NA	-2.08261	1.90702	1	1	9	14.4247	female unique
	N80-N98	E00-E07	F40-F48	NA	NA	-2.22709	1.22441	1	1	141	12.3699	female unique
	N80-N98	E65-E68	A00-A09	NA	NA	-2.98408	1.89829	1	1	123	11.6877	female unique
	N80-N98	E65-E68	A30-A49	NA	NA	-3.85829	1.25597	0.161647	1	57	11.0438	female unique
	N80-N98	E65-E68	J90-J94	NA	NA	-3.51851	1.06622	0.560709	1	45	12.9068	female unique
	N80-N98	E65-E68	N17-N19	NA	NA	-3.98471	2.07808	0.0983695	1	134	12.5836	female unique
	N80-N98	F30-F39	A00-A09	NA	NA	-3.7239	1.31899	0.269533	1	172	12.4342	female unique
	N80-N98	F30-F39	J95-J99	NA	NA	-0.00461951	5223.97	1	1	98	11.4603	female unique
	N80-N98	G50-G59	D50-D53	NA	NA	-1.53079	1.58751	1	1	129	11.263	female unique
	N80-N98	G50-G59	D60-D64	NA	NA	-0.00496598	2936.36	1	1	136	11.8151	female unique
	N80-N98	G50-G59	E65-E68	NA	NA	-1.60411	0.8932	1	1	241	12.8932	female unique
	N80-N98	G50-G59	E65-E68	N17-N19	NA	-0.00180607	16950.5	1	1	6	10.326	female unique
	N80-N98	G50-G59	F30-F39	NA	NA	-2.97675	1.35085	1	1	249	12.0877	female unique
	N80-N98	G50-G59	F30-F39	J09-J18	NA	-0.00286402	6301.69	1	1	15	14.6082	female unique
	N80-N98	G50-G59	F30-F39	N17-N19	NA	-0.00192401	19705.9	1	1	15	14.4767	female unique
	N80-N98	H00-H06	NA	NA	NA	-1.98089	0.59796	1	1	1422	7.32329	female unique
	N80-N98	H00-H06	F30-F39	NA	NA	-1.57112	3.05746	1	1	81	13.6548	female unique
	N80-N98	H00-H06	F40-F48	NA	NA	-0.0012499	2069.24	1	1	48	13.2973	female unique
	N80-N98	I10-I15	D50-D53	NA	NA	-3.56691	1.49462	0.47356	1	333	12.2082	female unique
	N80-N98	I10-I15	D50-D53	J95-J99	NA	-0.00208129	6964.34	1	1	17	11.8247	female unique
	N80-N98	I10-I15	D50-D53	N17-N19	NA	-1.88977	2.46622	1	1	34	14.5329	female unique
	N80-N98	I10-I15	E65-E68	NA	NA	-3.46878	0.537495	0.665033	1	654	12.3521	female unique
	N80-N98	I10-I15	E65-E68	J90-J94	NA	-0.00258037	4085.12	1	1	10	14.7425	female unique
	N80-N98	I10-I15	E65-E68	N17-N19	NA	-0.00449948	4444.32	1	1	39	14.3178	female unique
	N80-N98	I10-I15	F40-F48	NA	NA	-3.44348	0.654985	0.725311	1	377	12.4274	female unique
	N80-N98	I10-I15	K65-K67	NA	NA	-2.09068	1.32949	1	1	162	12.0301	female unique
	N80-N98	I10-I15	K65-K67	A00-A09	NA	-0.0026026	3010.49	1	1	15	13.4	female unique
	N80-N98	I20-I25	D50-D53	NA	NA	-2.53928	1.21151	1	1	141	11.7534	female unique
	N80-N98	I20-I25	D60-D64	NA	NA	-3.4894	0.844927	0.622556	1	148	11.3521	female unique
	N80-N98	I20-I25	E65-E68	NA	NA	-1.41666	1.34326	1	1	199	11.9151	female unique
	N80-N98	I20-I25	E65-E68	N17-N19	NA	-0.00245397	12782.5	1	1	10	13.1671	female unique
	N80-N98	I80-I89	E65-E68	NA	NA	-2.57846	0.776533	1	1	273	12.5699	female unique
	N80-N98	I80-I89	E65-E68	J90-J94	NA	-0.00211361	5681.59	1	1	5	16.3041	female unique
	N80-N98	I80-I89	E65-E68	N17-N19	NA	-0.0030852	6658.81	1	1	12	13.1603	female unique
	N80-N98	I80-I89	F30-F39	NA	NA	-2.2651	1.74585	1	1	294	12.0685	female unique
	N80-N98	I80-I89	F30-F39	J09-J18	NA	-0.0024216	8811.72	1	1	12	12.7986	female unique
	N80-N98	I80-I89	F30-F39	N17-N19	NA	-0.00202011	7675	1	1	9	11.4137	female unique
	N80-N98	I80-I89	M50-M54	J09-J18	NA	-0.0023204	3643.96	1	1	11	12.0603	female unique
	N80-N98	I80-I89	M50-M54	N17-N19	NA	-1.22329	5.73894	1	1	15	13.0493	female unique
	N80-N98	J30-J39	NA	NA	NA	-2.73534	0.442628	1	1	1595	6.53425	female unique
	N80-N98	J30-J39	M50-M54	NA	NA	-0.0018048	8752.34	1	1	98	11.4534	female unique
	N80-N98	J40-J47	E65-E68	NA	NA	-2.45643	1.35076	1	1	351	12.5014	female unique
	N80-N98	J40-J47	E65-E68	N17-N19	NA	-0.00314806	9696.95	1	1	21	14.463	female unique
	N80-N98	J40-J47	F30-F39	A00-A09	NA	-0.00255358	10870	1	1	26	14.6658	female unique
	N80-N98	J40-J47	F30-F39	N17-N19	NA	-0.00360926	7328.58	1	1	15	11.4137	female unique
	N80-N98	J40-J47	F40-F48	NA	NA	-3.24763	1.19784	1	1	245	12.0904	female unique
	N80-N98	K00-K14	D50-D53	NA	NA	0.00112175	9599.94	1	1	67	12.7151	female unique
	N80-N98	K00-K14	F30-F39	NA	NA	-2.08103	0.53245	1	1	151	12.1726	female unique
	N80-N98	K00-K14	F40-F48	NA	NA	-1.56716	1.72332	1	1	111	11.4301	female unique
	N80-N98	K20-K31	E65-E68	NA	NA	-2.12587	0.752604	1	1	522	12.3945	female unique
	N80-N98	K20-K31	E65-E68	N17-N19	NA	-0.00243748	13614	1	1	22	14.3767	female unique
	N80-N98	K20-K31	F30-F39	NA	NA	-3.74797	1.32463	0.246193	1	559	12.2767	female unique
	N80-N98	K20-K31	F30-F39	A00-A09	NA	-2.25149	1.59822	1	1	41	14.811	female unique
	N80-N98	K20-K31	F30-F39	J09-J18	NA	-0.00364541	4234.58	1	1	30	12.7918	female unique
	N80-N98	K20-K31	F30-F39	N17-N19	NA	-0.00242109	17701.7	1	1	23	12.1562	female unique
	N80-N98	K20-K31	F40-F48	NA	NA	-2.90629	1.21997	1	1	414	11.8904	female unique
	N80-N98	K20-K31	K65-K67	NA	NA	-2.8799	2.02461	1	1	197	11.389	female unique
	N80-N98	K40-K46	E65-E68	NA	NA	-1.74535	0.849864	1	1	383	11.7096	female unique
	N80-N98	K40-K46	E65-E68	N17-N19	NA	-0.0024248	10402.2	1	1	17	13.8493	female unique
	N80-N98	K40-K46	F30-F39	NA	NA	-2.70756	1.15398	1	1	346	12.063	female unique
	N80-N98	K40-K46	F30-F39	A00-A09	NA	-1.87301	2.3792	1	1	25	14.0603	female unique
	N80-N98	K40-K46	F30-F39	N17-N19	NA	-0.00247006	9700.04	1	1	20	11.474	female unique
	N80-N98	K40-K46	F40-F48	NA	NA	-2.76532	1.05623	1	1	246	11.5425	female unique
	N80-N98	K50-K52	E65-E68	NA	NA	-1.27172	1.30853	1	1	178	12.7877	female unique
	N80-N98	K50-K52	F30-F39	N17-N19	NA	-0.00228826	12100.9	1	1	18	11.4589	female unique
	N80-N98	K50-K52	M50-M54	NA	NA	-2.41492	1.30231	1	1	224	12.1575	female unique
	N80-N98	K50-K52	M50-M54	A00-A09	NA	-0.0806633	2.70193	1	1	15	10.5808	female unique
	N80-N98	K50-K52	M50-M54	J95-J99	NA	-0.00220489	10072.6	1	1	13	15.7233	female unique
	N80-N98	K50-K52	M50-M54	N17-N19	NA	-1.84617	2.2103	1	1	17	13.3014	female unique
	N80-N98	K55-K64	E65-E68	NA	NA	-3.0892	1.17108	1	1	550	12.289	female unique
	N80-N98	K55-K64	E65-E68	N17-N19	NA	-0.00280055	6911.37	1	1	30	14.3315	female unique
	N80-N98	K55-K64	F30-F39	A00-A09	NA	-0.0032802	3639.97	1	1	42	14.3397	female unique
	N80-N98	K55-K64	F30-F39	J09-J18	NA	-0.00341215	4706.24	1	1	29	13.0575	female unique
	N80-N98	K55-K64	F30-F39	J95-J99	NA	-0.00220486	8966.47	1	1	18	12.8205	female unique
	N80-N98	K55-K64	F30-F39	N17-N19	NA	-1.60809	3.06635	1	1	29	14.1836	female unique
	N80-N98	K55-K64	K65-K67	NA	NA	-3.48472	1.75273	0.632574	1	247	11.1808	female unique
	N80-N98	K55-K64	K65-K67	A00-A09	NA	-0.00270546	7394.3	1	1	22	13.2479	female unique
	N80-N98	K65-K67	A00-A09	NA	NA	-0.00436375	3477.72	1	1	64	12.9384	female unique
	N80-N98	K65-K67	I60-I69	NA	NA	-0.00248942	12588.2	1	1	26	13.7315	female unique
	N80-N98	K80-K87	D50-D53	NA	NA	-2.79002	1.85445	1	1	105	12.3096	female unique
	N80-N98	K80-K87	E65-E68	NA	NA	-1.9139	0.473497	1	1	237	12.074	female unique
	N80-N98	K80-K87	E65-E68	N17-N19	NA	-0.00185631	7751.39	1	1	7	13.7973	female unique
	N80-N98	K80-K87	F40-F48	NA	NA	-2.37963	1.29695	1	1	138	12.4384	female unique
	N80-N98	L80-L99	E65-E68	NA	NA	-1.85865	0.635794	1	1	120	12.2219	female unique
	N80-N98	M05-M14	D50-D53	NA	NA	-2.57089	1.39546	1	1	151	11.4301	female unique
	N80-N98	M05-M14	D50-D53	N17-N19	NA	-1.42177	4.69457	1	1	14	14.5329	female unique
	N80-N98	M15-M19	D50-D53	NA	NA	-3.03416	1.83317	1	1	268	11.5877	female unique
	N80-N98	M15-M19	D50-D53	N17-N19	NA	-1.99608	3.17286	1	1	25	12.4959	female unique
	N80-N98	M20-M25	D50-D53	NA	NA	-1.4371	2.23095	1	1	158	11.6753	female unique
	N80-N98	M20-M25	D50-D53	N17-N19	NA	-0.00166395	7182.25	1	1	12	15.3356	female unique
	N80-N98	M20-M25	D60-D64	NA	NA	-4.06756	1.19895	0.0713569	1	215	11.9452	female unique
	N80-N98	M20-M25	E65-E68	NA	NA	-1.04839	1.10206	1	1	359	11.874	female unique
	N80-N98	M20-M25	E65-E68	N17-N19	NA	-2.14097	2.16615	1	1	17	14.4247	female unique
	N80-N98	M20-M25	F30-F39	NA	NA	-2.83591	1.20132	1	1	337	12.189	female unique
	N80-N98	M20-M25	F30-F39	A00-A09	NA	-0.0021954	9221.44	1	1	22	14.5123	female unique
	N80-N98	M20-M25	F30-F39	N17-N19	NA	-0.00157258	17211	1	1	12	13.1384	female unique
	N80-N98	M20-M25	F40-F48	NA	NA	-1.98928	0.751876	1	1	215	12.3041	female unique
	N80-N98	M50-M54	A00-A09	NA	NA	-3.7091	1.02952	0.284123	1	195	13.0192	female unique
	N80-N98	M50-M54	A30-A49	NA	NA	-0.00624326	2777.06	1	1	65	10.6329	female unique
	N80-N98	M50-M54	B95-B98	NA	NA	-3.56437	1.36073	0.477441	1	163	10.9699	female unique
	N80-N98	M50-M54	D50-D53	NA	NA	-1.89548	1.66321	1	1	143	11.2493	female unique
	N80-N98	M50-M54	D60-D64	NA	NA	-4.0951	0.994835	0.0636769	1	169	11.5288	female unique
	N80-N98	M50-M54	E65-E68	NA	NA	-2.38934	0.813202	1	1	257	11.9753	female unique
	N80-N98	M50-M54	E65-E68	N17-N19	NA	-0.00343872	4540.21	1	1	15	12.6521	female unique
	N80-N98	M50-M54	F30-F39	NA	NA	-3.5574	0.875151	0.489522	1	314	11.8973	female unique
	N80-N98	M50-M54	F30-F39	N17-N19	NA	-0.00196337	15627.2	1	1	17	13.3288	female unique
	N80-N98	M50-M54	F40-F48	NA	NA	-2.31382	0.984484	1	1	186	12.1644	female unique
	N80-N98	M50-M54	H25-H28	NA	NA	-2.15151	0.606433	1	1	193	12.0192	female unique
	N80-N98	M50-M54	I26-I28	NA	NA	-0.00501616	3103.87	1	1	53	11.9233	female unique
	N80-N98	M50-M54	I30-I52	N17-N19	NA	-0.00229795	8714.71	1	1	9	12.5288	female unique
	N80-N98	M50-M54	I60-I69	NA	NA	-0.00454436	3982.86	1	1	76	12.4548	female unique
	N80-N98	M50-M54	I95-I99	NA	NA	-0.00363993	4709.55	1	1	99	11.9479	female unique
	N80-N98	M50-M54	K70-K77	NA	NA	-0.00321462	3996.3	1	1	84	11.9986	female unique
	N80-N98	M50-M54	K90-K93	NA	NA	-2.72118	0.900272	1	1	194	11.5219	female unique
	N80-N98	M65-M68	NA	NA	NA	-0.757689	0.393653	1	1	1623	7.69315	female unique
	N80-N98	M65-M68	D60-D64	NA	NA	-0.00413777	5603.12	1	1	57	10.8959	female unique
	N80-N98	M65-M68	F30-F39	NA	NA	-1.38573	1.80048	1	1	78	12.0014	female unique
	N80-N98	M65-M68	F40-F48	NA	NA	-0.698768	4.17744	1	1	53	11.4274	female unique
	N80-N98	M70-M79	D50-D53	NA	NA	-1.53658	4.17427	1	1	148	11.2877	female unique
	N80-N98	M70-M79	E65-E68	NA	NA	-2.32088	1.77257	1	1	330	12.6493	female unique
	N80-N98	M70-M79	E65-E68	N17-N19	NA	-0.00303661	6474.76	1	1	16	12.9918	female unique
	N80-N98	M70-M79	F40-F48	NA	NA	-2.27862	0.899399	1	1	225	12.389	female unique
	N80-N98	N10-N16	A00-A09	NA	NA	-0.0051003	2344.32	1	1	49	11.6384	female unique
	H00-H06	I30-I52	NA	NA	NA	NA	NA	NA	NA	502	5.76438	female unique
	J40-J47	I30-I52	NA	NA	NA	NA	NA	NA	NA	2163	5.07397	female unique
	M50-M54	I30-I52	NA	NA	NA	NA	NA	NA	NA	1139	5.06027	female unique
	N70-N77	J30-J39	NA	NA	NA	NA	NA	NA	NA	250	6.32603	female unique
	I10-I15	I30-I52	NA	NA	NA	NA	NA	NA	NA	4473	4.58082	common
	N60-N64	B95-B98	H25-H28	NA	NA	NA	NA	NA	NA	23	14.3973	female unique
	C50-C50	L80-L99	H25-H28	NA	NA	NA	NA	NA	NA	47	9.25479	female unique
	N60-N64	M20-M25	F30-F39	NA	NA	NA	NA	NA	NA	38	11.2384	female unique
	J30-J39	K40-K46	H25-H28	NA	NA	NA	NA	NA	NA	43	11.6603	female unique
	N60-N64	L80-L99	H25-H28	NA	NA	NA	NA	NA	NA	28	12.9014	female unique
	K50-K52	K00-K14	M45-M49	NA	NA	NA	NA	NA	NA	49	10.6493	female unique
	N60-N64	K20-K31	M70-M79	A00-A09	NA	NA	NA	NA	NA	8	15.1822	female unique
	N80-N98	M50-M54	H25-H28	N17-N19	NA	NA	NA	NA	NA	9	15.7699	female unique

## Sheet: 9. M trajectory death risk
	Diagnosis 1	Diagnosis 2	Diagnosis 3	Diagnosis 4	Diagnosis 5	Statistic	Standard error of statistic	Adjusted P-value of mortality rate multiplier of last diagnosis	Relative 1 year post-trajectory mortality rate multiplier of entire trajectory	Trajectory frequency	Median duration of trajectory (years)	Sex specificity
	F10-F19	D60-D64	J09-J18	NA	NA	-5.86425	1.66694	6.50569e-06	5.68361e-05	102	4.45616	male unique
	K40-K46	E70-E90	J95-J99	NA	NA	-6.34279	1.4621	3.65536e-07	9.38515e-05	226	8.2726	common
	G50-G59	K90-K93	NA	NA	NA	-5.67263	1.5315	1.91945e-05	0.000168659	385	5.15616	male unique
	K40-K46	F10-F19	J95-J99	NA	NA	-4.88854	1.77369	0.00107887	0.000171535	106	9.6863	common
	I80-I89	E70-E90	J95-J99	NA	NA	-5.07237	1.69423	0.000441212	0.000185255	128	8.1137	common
	K50-K52	J95-J99	NA	NA	NA	-10.2963	0.828692	2.14207e-21	0.000196976	408	5.54521	common
	K55-K64	J20-J22	J09-J18	NA	NA	-6.59213	1.28871	7.3577e-08	0.000204418	184	7.12877	male unique
	M15-M19	D60-D64	J09-J18	NA	NA	-6.43574	1.30371	2.02861e-07	0.000227055	105	6.87945	male unique
	E70-E90	D60-D64	J09-J18	NA	NA	-9.52296	0.879619	4.54796e-18	0.000230197	244	5.64247	male unique
	E00-E07	A30-A49	NA	NA	NA	-6.11718	1.36281	1.46011e-06	0.000239599	135	2.59452	common
	K20-K31	I70-I79	J95-J99	NA	NA	-4.77954	1.74357	0.0017939	0.00024034	77	9.43562	male unique
	K20-K31	C15-C26	N17-N19	NA	NA	-7.12319	1.16055	1.97418e-09	0.0002569	121	5.27397	common
	I10-I15	H25-H28	J95-J99	NA	NA	-6.1592	1.33409	1.13031e-06	0.000270038	150	8.5726	common
	I10-I15	C15-C26	N17-N19	NA	NA	-8.45825	0.970029	6.43288e-14	0.000273354	201	5.8411	male unique
	E10-E14	K80-K87	I95-I99	NA	NA	-4.1109	1.99177	0.0322783	0.000277979	56	8.86849	male unique
	I20-I25	M05-M14	J95-J99	NA	NA	-5.38414	1.51982	9.05555e-05	0.000279389	109	10.0986	male unique
	E10-E14	L00-L08	I95-I99	NA	NA	-4.78245	1.70891	0.00177332	0.00028223	87	10.0192	male unique
	N40-N51	K65-K67	NA	NA	NA	-4.65397	1.74663	0.00321044	0.000294936	345	3.53425	male unique
	M80-M85	J95-J99	NA	NA	NA	-7.41851	1.09328	2.35594e-10	0.000300369	191	3.27123	male unique
	J40-J47	G90-G99	NA	NA	NA	-9.64899	0.832785	1.36365e-18	0.000323751	340	4.31233	common
	C15-C26	N17-N19	NA	NA	NA	-15.527	0.516468	9.23236e-51	0.000329093	604	1.15068	common
	I20-I25	D50-D53	A30-A49	NA	NA	-4.90889	1.62988	0.000976408	0.000335161	66	10.0521	male unique
	K55-K64	C76-C80	N17-N19	NA	NA	-8.68723	0.913535	9.09856e-15	0.0003576	143	3.94247	male unique
	I10-I15	F10-F19	N17-N19	NA	NA	-8.97834	0.883563	6.95268e-16	0.000358735	335	7.66849	common
	E10-E14	H25-H28	J09-J18	NA	NA	-6.5988	1.20087	7.04643e-08	0.000361846	147	9.68219	male unique
	K20-K31	K80-K87	I95-I99	NA	NA	-4.28031	1.85106	0.0162188	0.00036227	87	7.80822	male unique
	I10-I15	L00-L08	J09-J18	NA	NA	-7.95065	0.99543	4.04292e-12	0.000365476	199	8.00822	male unique
	L00-L08	J95-J99	NA	NA	NA	-10.5419	0.749661	1.66838e-22	0.000369689	347	4.72329	male unique
	K55-K64	C76-C80	J09-J18	NA	NA	-9.18698	0.854543	1.04437e-16	0.000389489	155	5.10411	male unique
	K20-K31	I30-I52	A30-A49	NA	NA	-6.58656	1.18761	7.62974e-08	0.00040072	184	9.14521	male unique
	K40-K46	M15-M19	A30-A49	NA	NA	-5.07411	1.54134	0.000437989	0.000401242	91	10.3918	male unique
	K40-K46	C76-C80	N17-N19	NA	NA	-7.71116	1.01313	2.60462e-11	0.000404695	104	6.19041	male unique
	I10-I15	K80-K87	A30-A49	NA	NA	-6.66633	1.17127	4.51639e-08	0.00040644	136	6.70274	male unique
	C81-C96	J95-J99	NA	NA	NA	-11.2603	0.69185	6.5766e-26	0.000413683	267	1.83014	male unique
	E10-E14	B95-B98	A00-A09	NA	NA	-4.93815	1.57529	0.000849421	0.000418422	113	10.3863	male unique
	I10-I15	L00-L08	J95-J99	NA	NA	-7.09239	1.09582	2.45566e-09	0.000421389	120	8.48904	male unique
	I20-I25	M70-M79	J95-J99	NA	NA	-5.05645	1.53568	0.000477532	0.000424298	106	10.9918	male unique
	D10-D36	C60-C63	N17-N19	NA	NA	-4.94992	1.56345	0.000801828	0.000435524	51	8.38082	male unique
	D37-D48	C81-C96	N17-N19	NA	NA	-4.99225	1.54887	0.000654705	0.000438414	33	5.28767	male unique
	I10-I15	K50-K52	N17-N19	NA	NA	-7.31023	1.05693	5.19227e-10	0.00044102	268	8.30548	male unique
	N30-N39	I26-I28	NA	NA	NA	-7.46502	1.03302	1.66657e-10	0.000447639	353	4	male unique
	I20-I25	M50-M54	J09-J18	NA	NA	-5.46911	1.40529	5.80289e-05	0.000459358	132	10.3384	male unique
	I10-I15	H25-H28	J09-J18	NA	NA	-8.80103	0.872285	3.36336e-15	0.000463361	251	8.18904	common
	K20-K31	E70-E90	J95-J99	NA	NA	-8.6437	0.88774	1.32682e-14	0.000465055	294	8.30822	common
	M80-M85	A30-A49	NA	NA	NA	-6.94182	1.10079	6.98696e-09	0.000480131	152	2.94658	common
	K40-K46	F10-F19	J09-J18	NA	NA	-6.16948	1.23378	1.06199e-06	0.00049459	168	8.9863	male unique
	E10-E14	J95-J99	NA	NA	NA	-15.1131	0.502024	5.28766e-48	0.000506922	805	4.91507	common
	E70-E90	J95-J99	NA	NA	NA	-20.2038	0.374448	4.18463e-87	0.000518135	1506	3.20822	common
	I30-I52	D60-D64	J09-J18	NA	NA	-8.00611	0.943716	2.60945e-12	0.000523228	186	7.73014	male unique
	I10-I15	E65-E68	A30-A49	NA	NA	-6.19666	1.21848	8.99703e-07	0.000525837	147	8.34521	common
	M50-M54	I60-I69	NA	NA	NA	-7.10438	1.06116	2.25778e-09	0.000532008	446	4.7	common
	K20-K31	F10-F19	J95-J99	NA	NA	-6.37752	1.18199	2.94449e-07	0.000532366	146	9.82329	common
	I20-I25	H25-H28	J09-J18	NA	NA	-7.26364	1.03472	7.25714e-10	0.000544401	149	10.8466	common
	K40-K46	F10-F19	N17-N19	NA	NA	-6.30599	1.19133	4.579e-07	0.000546201	157	9.03014	common
	C15-C26	C76-C80	N17-N19	NA	NA	-10.2914	0.729818	2.25194e-21	0.000547111	159	1.83288	common
	I10-I15	F30-F39	A30-A49	NA	NA	-6.69953	1.12089	3.63201e-08	0.000547883	123	7.28767	male unique
	I10-I15	L00-L08	I95-I99	NA	NA	-5.55602	1.34571	3.64307e-05	0.000566074	138	8.16575	male unique
	I80-I89	F10-F19	N17-N19	NA	NA	-4.74362	1.57447	0.00211399	0.000570678	88	7.66575	male unique
	E10-E14	L00-L08	J09-J18	NA	NA	-5.37938	1.38667	9.27834e-05	0.000576002	118	9.29863	male unique
	E10-E14	C15-C26	N17-N19	NA	NA	-6.72071	1.10973	3.15019e-08	0.000576706	98	7.72466	male unique
	M45-M49	A30-A49	NA	NA	NA	-8.48081	0.879288	5.32489e-14	0.000577346	256	3.0589	common
	I20-I25	K00-K14	J09-J18	NA	NA	-5.20274	1.4314	0.000232499	0.000583057	84	11.5548	male unique
	E10-E14	I70-I79	I95-I99	NA	NA	-4.3636	1.70396	0.0114635	0.000590001	98	8.8589	male unique
	G50-G59	A30-A49	NA	NA	NA	-7.6979	0.965683	2.88255e-11	0.000590976	249	4.47945	common
	C15-C26	J95-J99	NA	NA	NA	-11.5344	0.643983	2.89595e-27	0.000594403	363	0.726027	common
	K20-K31	C76-C80	N17-N19	NA	NA	-8.57252	0.866169	2.444e-14	0.000596011	119	4.55616	common
	M45-M49	J95-J99	NA	NA	NA	-9.20379	0.806324	8.9495e-17	0.00059841	308	3.42055	common
	D60-D64	J09-J18	NA	NA	NA	-17.9614	0.412555	1.71457e-68	0.000605135	859	2.67945	male unique
	F10-F19	N17-N19	NA	NA	NA	-17.0974	0.432415	6.62854e-62	0.000615444	1012	3.17808	common
	I20-I25	G90-G99	NA	NA	NA	-11.303	0.653706	4.06713e-26	0.000618124	493	5.72603	male unique
	I10-I15	L00-L08	N17-N19	NA	NA	-7.29395	1.01215	5.82715e-10	0.000621991	293	8.88493	male unique
	I10-I15	M05-M14	J95-J99	NA	NA	-6.89145	1.07053	9.85762e-09	0.000625177	176	8.33562	male unique
	N30-N39	D60-D64	J09-J18	NA	NA	-6.56939	1.12049	8.53305e-08	0.000635589	108	7.41918	male unique
	K40-K46	F30-F39	J09-J18	NA	NA	-5.47227	1.34465	5.70489e-05	0.000637305	108	8.86849	common
	J40-J47	C76-C80	J09-J18	NA	NA	-8.58335	0.857045	2.22728e-14	0.000638545	106	4.09178	common
	I10-I15	G90-G99	NA	NA	NA	-15.3549	0.478733	1.31938e-49	0.000642005	963	4.43836	common
	K55-K64	J95-J99	NA	NA	NA	-17.9343	0.409501	2.79131e-68	0.000646393	1282	4.03014	common
	E10-E14	C76-C80	I95-I99	NA	NA	-4.54849	1.61362	0.0051546	0.000649335	34	5.28219	male unique
	K40-K46	E70-E90	A30-A49	NA	NA	-8.22754	0.891993	4.38586e-13	0.000649764	191	9.30411	male unique
	I10-I15	K55-K64	J95-J99	NA	NA	-10.7737	0.680472	1.4008e-23	0.000654773	378	7.09315	male unique
	H53-H54	A30-A49	NA	NA	NA	-6.35272	1.15291	3.4354e-07	0.000659434	120	2.79041	male unique
	K20-K31	K80-K87	N17-N19	NA	NA	-6.09891	1.1997	1.63077e-06	0.000664231	202	8.28767	common
	I70-I79	A30-A49	NA	NA	NA	-11.2473	0.650465	7.61182e-26	0.000664844	360	2.86438	common
	I10-I15	K55-K64	J09-J18	NA	NA	-13.8774	0.526684	3.28212e-40	0.000669498	615	7.52055	male unique
	J40-J47	J95-J99	NA	NA	NA	-17.3339	0.421493	1.12428e-63	0.00067143	1240	4.06301	common
	K40-K46	E70-E90	J09-J18	NA	NA	-10.0493	0.726356	2.63919e-20	0.000675973	371	8.84932	male unique
	K55-K64	F30-F39	J09-J18	NA	NA	-5.74163	1.26777	1.30714e-05	0.00068983	112	7.54384	common
	M20-M25	M05-M14	J09-J18	NA	NA	-4.78494	1.51959	0.00175317	0.000695324	79	10.4356	male unique
	K70-K77	G90-G99	NA	NA	NA	-7.08349	1.02555	2.61594e-09	0.000699982	130	2.38082	male unique
	I20-I25	M70-M79	J09-J18	NA	NA	-6.99354	1.03871	4.89432e-09	0.000700139	167	10.4219	male unique
	C64-C68	J95-J99	NA	NA	NA	-6.96475	1.0421	5.96469e-09	0.00070453	137	2.53425	male unique
	K40-K46	F30-F39	J95-J99	NA	NA	-4.34222	1.67083	0.0125518	0.000706553	63	9.60822	common
	K40-K46	E70-E90	N17-N19	NA	NA	-8.76762	0.825865	4.50749e-15	0.000716689	438	10.226	common
	J40-J47	D60-D64	J09-J18	NA	NA	-7.57827	0.954356	7.14373e-11	0.000722803	148	6.01918	male unique
	N40-N51	C60-C63	J09-J18	NA	NA	-5.55088	1.30272	3.7491e-05	0.00072363	69	6.61918	male unique
	M05-M14	J95-J99	NA	NA	NA	-12.1249	0.596369	2.65469e-30	0.00072386	517	3.6	common
	E10-E14	E65-E68	N17-N19	NA	NA	-5.5075	1.31188	4.71708e-05	0.00072802	233	9.05753	common
	F10-F19	A30-A49	NA	NA	NA	-14.1122	0.509744	1.21848e-41	0.000751366	522	2.4726	common
	L00-L08	N17-N19	NA	NA	NA	-12.2911	0.583663	3.48586e-31	0.00076637	743	4.74247	common
	M50-M54	A30-A49	NA	NA	NA	-10.0224	0.715123	3.45683e-20	0.000771441	352	3.65479	common
	I10-I15	I70-I79	J09-J18	NA	NA	-9.22271	0.77659	7.52023e-17	0.000775294	254	8.88493	male unique
	I10-I15	M45-M49	A30-A49	NA	NA	-6.42717	1.11434	2.14245e-07	0.000775467	89	7.26849	common
	I10-I15	N40-N51	J09-J18	NA	NA	-10.3461	0.691849	1.28619e-21	0.000778656	353	8.42466	male unique
	E10-E14	M45-M49	J95-J99	NA	NA	-4.13185	1.73083	0.0297596	0.000783648	46	7.82877	male unique
	K20-K31	F10-F19	J09-J18	NA	NA	-8.01567	0.891536	2.4218e-12	0.000787803	237	9.82466	male unique
	K40-K46	J20-J22	J09-J18	NA	NA	-6.98718	1.02254	5.10724e-09	0.000789034	147	9.39178	male unique
	G40-G47	J95-J99	NA	NA	NA	-10.061	0.709471	2.34697e-20	0.000794325	412	4.64247	male unique
	M20-M25	F10-F19	N17-N19	NA	NA	-4.40149	1.61999	0.00975101	0.000800415	78	8.42329	common
	E70-E90	A30-A49	NA	NA	NA	-21.0033	0.339225	2.85158e-94	0.000804844	1289	3.24384	male unique
	K40-K46	C76-C80	J09-J18	NA	NA	-10.2181	0.69704	4.78167e-21	0.000806832	133	6.87671	common
	N30-N39	J95-J99	NA	NA	NA	-13.3924	0.531796	2.46382e-37	0.00080715	597	4.40822	common
	C15-C26	C76-C80	J09-J18	NA	NA	-10.2583	0.694085	3.16585e-21	0.000808665	157	1.72329	male unique
	K40-K46	I30-I52	A30-A49	NA	NA	-7.34483	0.968784	4.03196e-10	0.000812374	150	8.7589	male unique
	F10-F19	J09-J18	NA	NA	NA	-18.715	0.379546	1.66981e-74	0.000822477	1044	2.91096	male unique
	I80-I89	J95-J99	NA	NA	NA	-12.429	0.571339	6.33784e-32	0.000824133	641	4.90685	common
	M05-M14	A30-A49	NA	NA	NA	-11.3929	0.622518	1.46537e-26	0.000831495	422	3.39452	common
	I10-I15	J95-J99	NA	NA	NA	-23.6204	0.300132	1.15323e-119	0.000834037	2104	4.33014	common
	F10-F19	J95-J99	NA	NA	NA	-14.8121	0.478566	4.81083e-46	0.0008346	728	2.59452	common
	I20-I25	J09-J18	NA	NA	NA	-22.2795	0.317783	2.78253e-106	0.000841735	1985	6.32603	common
	F30-F39	J09-J18	NA	NA	NA	-12.3157	0.574854	2.57608e-31	0.000841985	546	3.2274	common
	D10-D36	J95-J99	NA	NA	NA	-12.8251	0.551685	4.22545e-34	0.000845619	631	4.76712	male unique
	I10-I15	J20-J22	J09-J18	NA	NA	-10.4229	0.678424	5.80351e-22	0.000849287	283	8.05205	common
	K50-K52	J09-J18	NA	NA	NA	-13.8848	0.508943	2.95804e-40	0.000853149	719	5.33151	common
	I20-I25	C76-C80	J09-J18	NA	NA	-9.62415	0.734161	1.73055e-18	0.000853919	126	8.91918	male unique
	C76-C80	I95-I99	NA	NA	NA	-12.1979	0.579131	1.09423e-30	0.0008552	305	0.706849	common
	E10-E14	G90-G99	NA	NA	NA	-9.64597	0.732178	1.40285e-18	0.000856577	400	5.39452	common
	E10-E14	D50-D53	A30-A49	NA	NA	-4.93375	1.43147	0.000867146	0.000856631	75	8.73425	male unique
	I70-I79	J95-J99	NA	NA	NA	-12.2996	0.574129	3.14118e-31	0.000857453	413	3.99726	male unique
	D10-D36	E70-E90	J20-J22	NA	NA	-5.07156	1.39221	0.000442697	0.00085818	119	7.84932	male unique
	K20-K31	E70-E90	N17-N19	NA	NA	-9.69174	0.728512	9.02601e-19	0.000858306	569	10.2959	common
	I80-I89	E70-E90	I95-I99	NA	NA	-5.11202	1.37992	0.000364632	0.000863803	168	9.79178	male unique
	I10-I15	I80-I89	E70-E90	NA	NA	-6.88584	1.0244	1.02317e-08	0.000864081	468	6.70548	common
	K20-K31	D60-D64	J09-J18	NA	NA	-9.42175	0.748593	1.18539e-17	0.000864764	233	8.84932	male unique
	C81-C96	I30-I52	NA	NA	NA	-11.681	0.603601	5.26445e-28	0.000866854	447	2.73151	male unique
	I10-I15	C76-C80	J09-J18	NA	NA	-15.1488	0.46514	3.0804e-48	0.000870603	256	4.54932	common
	I10-I15	H25-H28	A30-A49	NA	NA	-6.29767	1.11862	4.82248e-07	0.000872037	125	8.67671	common
	I20-I25	A30-A49	NA	NA	NA	-17.0489	0.412838	1.51823e-61	0.000877496	910	5.66986	common
	K20-K31	C15-C26	J95-J99	NA	NA	-5.86658	1.1995	6.42387e-06	0.000878764	83	5.46301	common
	N10-N16	I95-I99	NA	NA	NA	-6.4684	1.08668	1.64227e-07	0.000885725	154	2.77945	male unique
	I20-I25	J95-J99	NA	NA	NA	-17.1357	0.409966	3.44284e-62	0.000889334	1288	5.33973	common
	K20-K31	E70-E90	J09-J18	NA	NA	-11.6239	0.603106	1.02604e-27	0.000902395	497	9.13699	male unique
	K20-K31	F10-F19	I95-I99	NA	NA	-5.16348	1.35767	0.000281669	0.000902557	143	8.68767	common
	I10-I15	I80-I89	D60-D64	J09-J18	NA	-5.11467	1.36833	0.000359861	0.000913179	36	9.76849	male unique
	K20-K31	L00-L08	J09-J18	NA	NA	-5.6628	1.23555	2.02679e-05	0.000914896	131	8.29589	male unique
	C15-C26	J09-J18	NA	NA	NA	-16.0318	0.436113	3.17172e-54	0.000919514	619	0.761644	common
	E10-E14	L00-L08	N17-N19	NA	NA	-6.35576	1.09952	3.37236e-07	0.00092265	194	10.0658	common
	M70-M79	I60-I69	N17-N19	NA	NA	-4.09805	1.70507	0.0340174	0.000923389	70	9.67123	male unique
	K40-K46	N30-N39	J95-J99	NA	NA	-5.67311	1.22937	1.91548e-05	0.000935572	106	9.32603	male unique
	J20-J22	J09-J18	NA	NA	NA	-15.4366	0.451736	3.74737e-50	0.0009366	800	2.6137	common
	I10-I15	G50-G59	N17-N19	NA	NA	-5.85636	1.19068	6.81765e-06	0.000936814	233	9.1726	male unique
	H30-H36	J09-J18	NA	NA	NA	-9.86839	0.70622	1.60026e-19	0.00094035	324	3.9411	common
	I10-I15	D60-D64	J09-J18	NA	NA	-12.5043	0.557315	2.47637e-32	0.000940736	361	7.6137	male unique
	K55-K64	F30-F39	I95-I99	NA	NA	-4.07025	1.71204	0.0381345	0.000941132	72	9.44658	male unique
	I10-I15	I30-I52	A30-A49	NA	NA	-11.2345	0.620196	8.77391e-26	0.000941911	322	7.63151	male unique
	I20-I25	I70-I79	J09-J18	NA	NA	-8.60066	0.809455	1.92514e-14	0.000947346	212	10.7808	male unique
	K40-K46	E70-E90	I95-I99	NA	NA	-6.08773	1.1434	1.74418e-06	0.000948423	222	10.5685	male unique
	D50-D53	A30-A49	NA	NA	NA	-9.85917	0.705597	1.75187e-19	0.000952335	259	1.73699	common
	G50-G59	J95-J99	NA	NA	NA	-9.31646	0.746044	3.16472e-17	0.000958162	285	5.73699	common
	G50-G59	J09-J18	NA	NA	NA	-11.4301	0.607975	9.60308e-27	0.000959402	492	5.34658	common
	K40-K46	K55-K64	I60-I69	NA	NA	-5.37061	1.29371	9.67545e-05	0.000960566	166	8.7863	male unique
	N40-N51	A30-A49	NA	NA	NA	-14.3271	0.484821	5.694e-43	0.000962393	665	4.6137	male unique
	K55-K64	C76-C80	J20-J22	NA	NA	-7.8313	0.88654	1.03089e-11	0.000965599	110	4.21644	male unique
	M45-M49	J09-J18	NA	NA	NA	-10.9795	0.632132	1.49519e-24	0.000967765	485	3.48767	common
	E70-E90	J20-J22	J09-J18	NA	NA	-9.5789	0.724504	2.67584e-18	0.000968316	206	6.3863	male unique
	C76-C80	N17-N19	NA	NA	NA	-21.43	0.32376	3.29063e-98	0.000970034	617	0.794521	common
	I20-I25	K70-K77	NA	NA	NA	-10.7495	0.645412	1.81802e-23	0.000970368	708	6.23151	common
	N40-N51	J95-J99	NA	NA	NA	-14.5894	0.475266	1.27644e-44	0.000974265	763	4.96438	male unique
	K50-K52	I60-I69	NA	NA	NA	-7.16191	0.967468	1.51008e-09	0.000979063	374	5.55205	common
	J40-J47	E65-E68	N17-N19	NA	NA	-4.42706	1.56211	0.00874071	0.000992231	111	9.67671	common
	J40-J47	N17-N19	NA	NA	NA	-18.8239	0.367313	2.15658e-75	0.000993529	1485	4.63836	common
	K20-K31	K55-K64	K65-K67	NA	NA	-4.22544	1.63593	0.0203893	0.00099523	182	8.50822	male unique
	J40-J47	J09-J18	NA	NA	NA	-20.8324	0.331606	1.0244e-92	0.000999586	1774	4.23562	common
	K80-K87	I95-I99	NA	NA	NA	-8.76071	0.788302	4.78642e-15	0.00100167	314	3.73973	common
	M15-M19	D60-D64	A30-A49	NA	NA	-6.21292	1.11112	8.15001e-07	0.00100446	74	7.21233	male unique
	I20-I25	C64-C68	J09-J18	NA	NA	-4.88256	1.41285	0.00111107	0.00100947	44	9.76986	male unique
	F10-F19	I95-I99	NA	NA	NA	-12.4463	0.553955	5.11254e-32	0.00101315	673	2.71781	common
	E00-E07	I95-I99	NA	NA	NA	-6.54693	1.05272	9.86135e-08	0.00101583	177	3.1863	common
	M70-M79	F10-F19	N17-N19	NA	NA	-4.98561	1.38181	0.000674477	0.00101877	91	9.3589	common
	K20-K31	J20-J22	J09-J18	NA	NA	-7.29817	0.943574	5.66195e-10	0.00102162	173	9.30959	common
	D37-D48	N17-N19	NA	NA	NA	-11.7054	0.588245	3.95417e-28	0.00102236	368	3.29863	common
	I20-I25	F30-F39	J09-J18	NA	NA	-5.9232	1.16173	4.62562e-06	0.00102693	96	9.57123	male unique
	M05-M14	J09-J18	NA	NA	NA	-15.5082	0.443454	1.23588e-50	0.00103106	814	3.66575	common
	K20-K31	C15-C26	E70-E90	NA	NA	-8.1629	0.842323	7.41825e-13	0.00103248	236	5.47534	common
	K40-K46	I70-I79	J95-J99	NA	NA	-4.85215	1.41645	0.00128117	0.00103558	61	11.0301	male unique
	K80-K87	A30-A49	NA	NA	NA	-12.5123	0.549241	2.24256e-32	0.00103614	409	1.7589	common
	I20-I25	K90-K93	A30-A49	NA	NA	-5.55715	1.23588	3.6224e-05	0.00104059	79	8.15342	male unique
	D37-D48	J95-J99	NA	NA	NA	-9.76214	0.701967	4.55144e-19	0.0010566	205	2.28767	common
	M70-M79	C76-C80	J09-J18	NA	NA	-6.36036	1.07666	3.27477e-07	0.0010616	55	6.03562	male unique
	F10-F19	C76-C80	J09-J18	NA	NA	-7.87291	0.8697	7.45293e-12	0.00106257	76	2.49589	male unique
	E10-E14	I30-I52	N17-N19	NA	NA	-9.1134	0.750475	2.05117e-16	0.00107077	446	8.88219	common
	I10-I15	I70-I79	I95-I99	NA	NA	-5.87174	1.16469	6.24024e-06	0.00107141	181	8.64658	male unique
	C64-C68	J09-J18	NA	NA	NA	-10.3513	0.660014	1.2186e-21	0.00107866	217	2.28767	male unique
	I20-I25	D60-D64	J09-J18	NA	NA	-9.05749	0.753361	3.40795e-16	0.00108784	213	10.0466	male unique
	I10-I15	N30-N39	J09-J18	NA	NA	-11.4141	0.597396	1.15242e-26	0.0010931	361	8.23288	common
	K40-K46	D60-D64	A30-A49	NA	NA	-7.73622	0.881205	2.1508e-11	0.00109479	119	8.20822	male unique
	K40-K46	C76-C80	A30-A49	NA	NA	-7.28666	0.935156	6.14199e-10	0.00109812	110	5.7411	male unique
	I10-I15	A30-A49	NA	NA	NA	-24.5777	0.277056	1.07239e-129	0.00110336	1844	4.17945	common
	E70-E90	J09-J18	NA	NA	NA	-27.9192	0.24384	7.84617e-168	0.00110512	2393	3.63014	male unique
	K70-K77	K65-K67	NA	NA	NA	-6.06022	1.12322	2.06079e-06	0.00110602	161	1.23288	male unique
	I30-I52	A30-A49	NA	NA	NA	-18.569	0.366561	2.54689e-73	0.00110636	987	3.13699	male unique
	E10-E14	I95-I99	NA	NA	NA	-13.669	0.496823	5.8175e-39	0.00112375	875	5.46575	common
	E65-E68	A30-A49	NA	NA	NA	-9.24357	0.734674	6.22004e-17	0.00112383	255	2.41096	common
	K40-K46	I70-I79	N17-N19	NA	NA	-6.10881	1.11008	1.53578e-06	0.00113482	135	9.79726	male unique
	F30-F39	J95-J99	NA	NA	NA	-9.2027	0.736653	9.03402e-17	0.00113719	334	3.81644	common
	C81-C96	I95-I99	NA	NA	NA	-8.51498	0.795476	3.98559e-14	0.00114373	237	1.63836	male unique
	N20-N23	J09-J18	NA	NA	NA	-8.42656	0.803032	8.3972e-14	0.00115137	319	5.56164	common
	K55-K64	J09-J18	NA	NA	NA	-24.7474	0.273401	1.62377e-131	0.00115234	2139	4.12055	common
	G40-G47	J09-J18	NA	NA	NA	-13.5757	0.498016	2.07471e-38	0.00115814	714	4.71918	common
	I20-I25	H25-H28	J95-J99	NA	NA	-5.5264	1.22336	4.26896e-05	0.00115832	92	10.9178	common
	I80-I89	I70-I79	N17-N19	NA	NA	-4.30989	1.56779	0.014357	0.00116272	92	7.03973	male unique
	M70-M79	J95-J99	NA	NA	NA	-10.9985	0.614163	1.21463e-24	0.00116518	535	4.86849	common
	I80-I89	M70-M79	J09-J18	NA	NA	-4.2176	1.59957	0.0210618	0.00117518	102	9.85068	common
	K40-K46	J95-J99	NA	NA	NA	-15.8929	0.424455	2.91912e-53	0.0011758	1028	6.12192	common
	I30-I52	J20-J22	J09-J18	NA	NA	-8.39584	0.803469	1.0838e-13	0.00117581	169	6.30411	male unique
	F30-F39	A30-A49	NA	NA	NA	-11.0143	0.611745	1.02309e-24	0.00118507	305	2.71781	common
	I10-I15	K55-K64	J90-J94	NA	NA	-10.1139	0.665919	1.37617e-20	0.0011885	376	6.79589	male unique
	K00-K14	J09-J18	NA	NA	NA	-11.3959	0.590415	1.41765e-26	0.00119654	472	4.83288	common
	E10-E14	N30-N39	A30-A49	NA	NA	-6.92932	0.97099	7.61156e-09	0.00119656	112	8.52192	male unique
	K00-K14	J95-J99	NA	NA	NA	-9.54771	0.704396	3.60012e-18	0.00120008	305	4.75068	common
	E65-E68	J09-J18	NA	NA	NA	-9.91199	0.678443	1.04234e-19	0.00120086	453	3.26575	male unique
	M50-M54	J09-J18	NA	NA	NA	-13.4506	0.499786	1.12649e-37	0.0012036	715	4.58356	common
	K55-K64	I60-I69	NA	NA	NA	-13.0183	0.51619	3.46714e-35	0.00120662	1235	4.57534	common
	J40-J47	K70-K77	NA	NA	NA	-9.83778	0.68275	2.16489e-19	0.00121047	537	3.66849	common
	K20-K31	C15-C26	C76-C80	N17-N19	NA	-4.15354	1.61697	0.0273024	0.00121117	25	5.09041	common
	K20-K31	J09-J18	NA	NA	NA	-23.5087	0.285606	1.6103e-118	0.00121354	2191	5.37534	common
	E10-E14	H25-H28	N17-N19	NA	NA	-6.3237	1.06136	4.10638e-07	0.00121654	256	10.2151	common
	K20-K31	C81-C96	J09-J18	NA	NA	-7.13366	0.940668	1.83646e-09	0.00121818	93	8.28219	male unique
	I20-I25	B95-B98	A00-A09	NA	NA	-5.81665	1.15302	8.53745e-06	0.00122265	129	9.5726	male unique
	E10-E14	J09-J18	NA	NA	NA	-18.9409	0.353915	2.35633e-76	0.00122665	1297	5.11507	common
	N40-N51	D60-D64	J09-J18	NA	NA	-7.75377	0.86448	1.87866e-11	0.00122725	117	6.69041	male unique
	I70-I79	J09-J18	NA	NA	NA	-14.7267	0.455008	1.69965e-45	0.00122994	671	3.54521	male unique
	I10-I15	K70-K77	NA	NA	NA	-15.8702	0.422138	4.18378e-53	0.00123163	1432	4.53973	common
	E10-E14	K20-K31	I60-I69	NA	NA	-5.58402	1.19955	3.13048e-05	0.00123297	136	9.73014	male unique
	K20-K31	F10-F19	N17-N19	NA	NA	-7.34549	0.910922	4.01392e-10	0.00124182	219	10.0575	common
	I10-I15	C76-C80	N17-N19	NA	NA	-13.4444	0.496542	1.22375e-37	0.00126116	239	5.06027	common
	H30-H36	J95-J99	NA	NA	NA	-7.45095	0.89585	1.85059e-10	0.00126216	182	3.96712	common
	K20-K31	A30-A49	NA	NA	NA	-18.9889	0.351245	9.4645e-77	0.00126871	1076	4.89726	common
	I10-I15	J09-J18	NA	NA	NA	-30.5432	0.21837	3.55198e-201	0.00126875	3363	4.57808	common
	I20-I25	D60-D64	A30-A49	NA	NA	-6.5797	1.01346	7.98098e-08	0.0012706	98	9.94384	male unique
	K20-K31	N30-N39	I95-I99	NA	NA	-5.2545	1.26887	0.000178854	0.00127183	139	9.53973	male unique
	I20-I25	G40-G47	N17-N19	NA	NA	-5.64494	1.18062	2.22903e-05	0.00127537	190	10.5712	male unique
	K00-K14	J90-J94	NA	NA	NA	-9.68136	0.688163	9.98376e-19	0.00127814	285	5.38356	common
	C81-C96	N17-N19	NA	NA	NA	-14.1318	0.471384	9.23475e-42	0.00127921	436	2.40137	male unique
	D10-D36	N17-N19	NA	NA	NA	-15.6511	0.425545	1.32945e-51	0.00128085	1186	5.52192	male unique
	I80-I89	F10-F19	J09-J18	NA	NA	-4.82664	1.37975	0.00144547	0.00128173	90	8.31918	male unique
	I10-I15	M05-M14	J09-J18	NA	NA	-9.5621	0.69628	3.13858e-18	0.00128384	287	7.9863	male unique
	D10-D36	C76-C80	J09-J18	NA	NA	-9.40952	0.70739	1.32923e-17	0.00128603	99	5.95616	male unique
	M20-M25	D60-D64	J09-J18	NA	NA	-5.34595	1.24485	0.000110181	0.00128769	73	9.13973	male unique
	E10-E14	C76-C80	J09-J18	NA	NA	-7.97919	0.833464	3.22718e-12	0.00129355	67	4.56986	common
	I10-I15	E70-E90	N17-N19	NA	NA	-14.7129	0.451826	2.08457e-45	0.00129704	1128	8.26438	common
	K20-K31	C76-C80	I95-I99	NA	NA	-5.21872	1.27347	0.000214213	0.00129932	53	5.04658	common
	K50-K52	I30-I52	N17-N19	NA	NA	-4.99505	1.32971	0.000647026	0.00130446	129	8.75616	common
	K20-K31	M80-M85	A30-A49	NA	NA	-4.79496	1.38481	0.0016768	0.00130688	49	8.23836	male unique
	K80-K87	J95-J99	NA	NA	NA	-10.9129	0.607392	3.10109e-24	0.00132228	363	2.58904	common
	I10-I15	K90-K93	A30-A49	NA	NA	-6.88729	0.962397	1.0133e-08	0.0013224	126	6.28767	male unique
	N40-N51	K70-K77	NA	NA	NA	-9.25596	0.715533	5.54368e-17	0.00132951	465	4.6411	male unique
	I80-I89	F10-F19	J95-J99	NA	NA	-4.45847	1.48539	0.0076439	0.00133002	59	8.61096	male unique
	C81-C96	I26-I28	NA	NA	NA	-5.23606	1.26476	0.00019636	0.00133032	115	1.49041	male unique
	I20-I25	H25-H28	I95-I99	NA	NA	-5.66267	1.1686	2.02686e-05	0.0013369	109	10.189	common
	N30-N39	J09-J18	NA	NA	NA	-19.107	0.346274	9.93672e-78	0.00133845	1101	4.19726	common
	D37-D48	A30-A49	NA	NA	NA	-10.9555	0.603662	1.94609e-24	0.00134224	281	1.50411	common
	M05-M14	I95-I99	NA	NA	NA	-11.0053	0.60031	1.12762e-24	0.00135142	530	3.30822	common
	K20-K31	J95-J99	NA	NA	NA	-18.6859	0.353547	2.87776e-74	0.00135179	1285	5.14247	common
	I10-I15	K55-K64	N17-N19	NA	NA	-13.3932	0.493143	2.43528e-37	0.00135389	883	7.96986	common
	K50-K52	F10-F19	N17-N19	NA	NA	-4.1588	1.58771	0.0267454	0.00135634	70	7.8137	common
	K55-K64	A30-A49	NA	NA	NA	-20.5293	0.32134	5.46853e-90	0.00136461	1220	3.22055	common
	I10-I15	D60-D64	A30-A49	NA	NA	-10.9645	0.601458	1.76299e-24	0.00136764	232	6.23836	common
	K50-K52	G90-G99	NA	NA	NA	-7.01906	0.938077	4.09436e-09	0.00138173	199	4.89863	common
	K20-K31	I70-I79	J09-J18	NA	NA	-5.90883	1.1134	5.03737e-06	0.00138941	155	9.2411	male unique
	H25-H28	J09-J18	NA	NA	NA	-15.1238	0.43468	4.49638e-48	0.00139615	735	4.23836	common
	K80-K87	J09-J18	NA	NA	NA	-12.5989	0.521341	7.52848e-33	0.00140412	577	3.45753	common
	L00-L08	J09-J18	NA	NA	NA	-13.9012	0.47235	2.35559e-40	0.00140712	618	4.36712	male unique
	K40-K46	L00-L08	J09-J18	NA	NA	-4.62706	1.41885	0.00361256	0.00140868	87	8.92055	male unique
	M70-M79	D60-D64	J09-J18	NA	NA	-5.65425	1.16036	2.11937e-05	0.0014145	81	8.14247	male unique
	I20-I25	K55-K64	J90-J94	NA	NA	-7.52688	0.871414	1.05128e-10	0.00141726	232	10.326	male unique
	I20-I25	H30-H36	N17-N19	NA	NA	-5.16848	1.26681	0.000274952	0.00143374	119	10.5808	common
	K80-K87	N17-N19	NA	NA	NA	-12.9787	0.504158	5.79494e-35	0.00143973	625	3.98356	common
	I10-I15	I80-I89	N17-N19	NA	NA	-8.71845	0.749644	6.93268e-15	0.00145067	374	8.63973	male unique
	N30-N39	A30-A49	NA	NA	NA	-15.7005	0.416243	6.11667e-52	0.00145141	724	3.42466	male unique
	K20-K31	N30-N39	J09-J18	NA	NA	-8.43136	0.774889	8.06345e-14	0.00145409	241	9.78082	male unique
	K50-K52	N17-N19	NA	NA	NA	-13.3554	0.487791	4.0426e-37	0.00148156	881	5.7589	common
	D10-D36	C76-C80	N17-N19	NA	NA	-8.61704	0.755507	1.67022e-14	0.00148812	91	4.87397	male unique
	D37-D48	C81-C96	J95-J99	NA	NA	-4.74093	1.37253	0.00214013	0.00149284	21	3.80548	male unique
	I10-I15	F30-F39	J09-J18	NA	NA	-7.56718	0.859632	7.76542e-11	0.00149595	167	7.62192	male unique
	J40-J47	A30-A49	NA	NA	NA	-15.9866	0.4068	6.54009e-54	0.0014984	703	3.5726	common
	C81-C96	J09-J18	NA	NA	NA	-14.6635	0.443479	4.30758e-45	0.00149898	541	1.86027	male unique
	K40-K46	C81-C96	J09-J18	NA	NA	-6.49842	1.00068	1.35634e-07	0.00149913	81	7.82466	male unique
	J40-J47	I26-I28	NA	NA	NA	-12.259	0.529208	5.17051e-31	0.00152226	512	3.38904	common
	I10-I15	D37-D48	N17-N19	NA	NA	-5.67512	1.1431	1.89727e-05	0.00152276	123	7.58082	male unique
	C60-C63	J09-J18	NA	NA	NA	-14.3789	0.450528	2.70642e-43	0.00153671	387	3.27671	male unique
	K20-K31	C76-C80	J09-J18	NA	NA	-11.7264	0.552424	3.08931e-28	0.00153693	156	5.06438	common
	I60-I69	J09-J18	NA	NA	NA	-14.0508	0.460878	2.89673e-41	0.00154041	593	3.58904	common
	N40-N51	J09-J18	NA	NA	NA	-19.493	0.33217	5.72028e-81	0.00154154	1215	5.13973	male unique
	K20-K31	D37-D48	J09-J18	NA	NA	-5.69563	1.13616	1.69499e-05	0.00154742	60	4.52466	common
	I80-I89	G90-G99	NA	NA	NA	-9.6689	0.669096	1.12571e-18	0.00155012	349	5.34521	common
	I10-I15	H30-H36	J09-J18	NA	NA	-6.23264	1.03699	7.22358e-07	0.00155987	134	7.40548	common
	C15-C26	E70-E90	NA	NA	NA	-17.077	0.378303	9.40131e-62	0.00156437	1128	0.79589	common
	I20-I25	M50-M54	J95-J99	NA	NA	-4.32938	1.48988	0.0132482	0.0015801	87	10.5452	male unique
	C76-C80	J09-J18	NA	NA	NA	-26.8775	0.239971	2.00942e-155	0.0015808	749	0.690411	common
	C76-C80	A30-A49	NA	NA	NA	-18.8195	0.342697	2.34155e-75	0.00158151	629	0.493151	common
	I10-I15	C76-C80	J20-J22	NA	NA	-9.87659	0.652567	1.47677e-19	0.00158823	142	5.3	common
	I10-I15	K20-K31	I30-I52	N17-N19	NA	-4.28194	1.50504	0.0161373	0.00158924	92	10.0466	male unique
	E10-E14	A30-A49	NA	NA	NA	-16.5011	0.390531	1.50905e-57	0.00158973	763	4.62466	common
	C15-C26	J90-J94	NA	NA	NA	-14.7699	0.436218	8.98375e-46	0.00159183	523	0.649315	common
	C76-C80	J20-J22	NA	NA	NA	-15.5024	0.415554	1.35223e-50	0.00159308	448	0.765753	common
	K40-K46	F10-F19	J90-J94	NA	NA	-4.36633	1.4754	0.011334	0.00159311	82	8.62603	male unique
	K20-K31	N40-N51	N17-N19	NA	NA	-8.01624	0.803173	2.41172e-12	0.00159891	276	11.3973	male unique
	K40-K46	H25-H28	N17-N19	NA	NA	-5.25418	1.22487	0.000179016	0.00160327	139	9.52329	common
	H30-H36	I95-I99	NA	NA	NA	-6.17674	1.04094	1.0156e-06	0.00161309	203	5.2274	common
	I20-I25	C76-C80	N17-N19	NA	NA	-7.6291	0.84214	4.86034e-11	0.0016209	112	8.89452	male unique
	K20-K31	K70-K77	NA	NA	NA	-12.6135	0.509319	6.26386e-33	0.00162166	1165	4.92603	common
	K55-K64	K70-K77	NA	NA	NA	-12.4306	0.516729	6.2171e-32	0.00162339	1008	3.95753	common
	I70-I79	D60-D64	J09-J18	NA	NA	-5.93605	1.0818	4.2978e-06	0.00162606	93	7.22466	male unique
	E10-E14	I60-I69	NA	NA	NA	-10.9529	0.586059	2.00263e-24	0.00163024	929	5.43836	common
	I30-I52	I95-I99	NA	NA	NA	-16.9804	0.377901	4.87743e-61	0.00163369	1422	3.33836	common
	I10-I15	D50-D53	A30-A49	NA	NA	-7.59512	0.844457	6.29484e-11	0.00163887	121	6.84384	common
	K20-K31	G90-G99	NA	NA	NA	-11.9847	0.535086	1.44081e-29	0.00164038	565	5.51507	common
	D10-D36	G90-G99	NA	NA	NA	-8.1157	0.790058	1.08773e-12	0.00164194	292	4.96164	male unique
	E10-E14	I60-I69	A30-A49	NA	NA	-5.16458	1.24112	0.000280255	0.00164523	61	8.93699	male unique
	G40-G47	A30-A49	NA	NA	NA	-10.1703	0.630244	7.76586e-21	0.00164537	331	4.7726	common
	I20-I25	I60-I69	NA	NA	NA	-13.8255	0.463609	6.7419e-40	0.00164565	1530	5.87945	common
	I20-I25	G40-G47	J90-J94	NA	NA	-4.13481	1.54996	0.0294503	0.00164699	83	8.50685	male unique
	M70-M79	J09-J18	NA	NA	NA	-15.4707	0.414228	2.20808e-50	0.00164765	910	5.12466	common
	K00-K14	N17-N19	NA	NA	NA	-10.8022	0.592842	1.03049e-23	0.00165494	467	6.16164	common
	C64-C68	A30-A49	NA	NA	NA	-8.57615	0.745938	2.36908e-14	0.00166608	174	1.8274	male unique
	C60-C63	N17-N19	NA	NA	NA	-13.5874	0.470742	1.77145e-38	0.00166795	518	3.36438	male unique
	I10-I15	K20-K31	E70-E90	N17-N19	NA	-4.1134	1.55467	0.0319695	0.00166993	98	10.0397	common
	J30-J39	J20-J22	NA	NA	NA	-7.13217	0.89661	1.8555e-09	0.00167027	367	5.83836	male unique
	G50-G59	N17-N19	NA	NA	NA	-10.1677	0.628346	7.97848e-21	0.00168026	557	5.37534	common
	M20-M25	A30-A49	NA	NA	NA	-11.0037	0.58038	1.14675e-24	0.00168439	403	5.71233	common
	C60-C63	C76-C80	J09-J18	NA	NA	-9.42431	0.677408	1.15721e-17	0.00168818	93	5.76986	male unique
	I20-I25	K00-K14	N17-N19	NA	NA	-4.29136	1.48716	0.0155358	0.00169183	91	11.7836	male unique
	C81-C96	J90-J94	NA	NA	NA	-11.1002	0.574931	3.94228e-25	0.00169195	279	2.16986	male unique
	K50-K52	N25-N29	NA	NA	NA	-5.23789	1.21673	0.000194748	0.00170686	203	5.25479	male unique
	K40-K46	A30-A49	NA	NA	NA	-17.7331	0.35919	1.01524e-66	0.00171293	873	5.72877	common
	C15-C26	L80-L99	NA	NA	NA	-9.78943	0.650636	3.48258e-19	0.00171327	268	2.28493	male unique
	K40-K46	J09-J18	NA	NA	NA	-20.9421	0.304111	1.03175e-93	0.00171431	1770	6.13014	common
	K20-K31	H25-H28	J09-J18	NA	NA	-7.66257	0.831004	3.77634e-11	0.00171624	157	10.9288	common
	I10-I15	M70-M79	A30-A49	NA	NA	-7.15027	0.890392	1.63428e-09	0.00171809	162	8.20274	male unique
	I70-I79	N17-N19	NA	NA	NA	-13.5357	0.470149	3.56503e-38	0.00172279	856	4.24384	male unique
	K20-K31	M15-M19	N17-N19	NA	NA	-6.64379	0.95772	5.2248e-08	0.00172438	278	11.2959	common
	E10-E14	K70-K77	NA	NA	NA	-10.8205	0.587903	8.45211e-24	0.00172693	672	4.21644	common
	K40-K46	D60-D64	J09-J18	NA	NA	-7.07034	0.899157	2.86862e-09	0.00173397	149	8.73699	male unique
	K20-K31	H25-H28	N17-N19	NA	NA	-6.67815	0.950658	4.1766e-08	0.00174913	197	10.2329	common
	H25-H28	J95-J99	NA	NA	NA	-11.8652	0.534922	5.99601e-29	0.00175204	455	4.2274	common
	C15-C26	A30-A49	NA	NA	NA	-15.9657	0.397472	9.14314e-54	0.0017539	529	0.70411	common
	E10-E14	E65-E68	A30-A49	NA	NA	-5.42726	1.16914	7.23325e-05	0.00175514	86	7.71096	male unique
	E10-E14	C15-C26	I95-I99	NA	NA	-4.51075	1.40664	0.00610456	0.00175549	46	7.29726	male unique
	I10-I15	C76-C80	A30-A49	NA	NA	-11.6754	0.542929	5.61909e-28	0.00176623	230	3.75342	common
	I80-I89	I30-I52	I95-I99	NA	NA	-4.99384	1.26826	0.00065051	0.00177582	129	7.92877	common
	H25-H28	A30-A49	NA	NA	NA	-10.7865	0.586934	1.21955e-23	0.00178028	337	3.97534	common
	I10-I15	M05-M14	A30-A49	NA	NA	-8.01216	0.789945	2.48754e-12	0.00178352	178	8.28767	male unique
	H30-H36	A30-A49	NA	NA	NA	-7.57868	0.834972	7.12488e-11	0.00178563	180	4.29589	common
	J40-J47	I95-I99	NA	NA	NA	-13.0387	0.484895	2.65826e-35	0.00179562	777	4.49863	common
	K40-K46	I60-I69	J09-J18	NA	NA	-5.3937	1.17143	8.60331e-05	0.00180291	92	9.03836	common
	C15-C26	E70-E90	J09-J18	NA	NA	-7.21899	0.87494	1.00039e-09	0.00180683	102	2.9411	male unique
	I10-I15	M05-M14	I95-I99	NA	NA	-7.55254	0.836149	8.67792e-11	0.00180887	207	7.90685	male unique
	C64-C68	E70-E90	NA	NA	NA	-11.0738	0.569831	5.29295e-25	0.00181772	645	3.03014	male unique
	I20-I25	G40-G47	J09-J18	NA	NA	-6.96112	0.90593	6.11353e-09	0.0018248	146	10.9164	male unique
	F10-F19	J90-J94	NA	NA	NA	-13.9742	0.451239	8.49327e-41	0.00182586	606	2.63699	common
	M05-M14	C76-C80	J09-J18	NA	NA	-6.51033	0.967976	1.25448e-07	0.00183292	41	5.30411	male unique
	D37-D48	I26-I28	NA	NA	NA	-5.84482	1.07777	7.2824e-06	0.00183752	105	3.33699	male unique
	I10-I15	H25-H28	I95-I99	NA	NA	-6.67805	0.942848	4.17683e-08	0.00184295	159	9.21096	common
	I20-I25	K55-K64	J09-J18	NA	NA	-11.1505	0.564663	2.2512e-25	0.00184321	395	10.2384	male unique
	D60-D64	A30-A49	NA	NA	NA	-16.3301	0.385503	2.51339e-56	0.00184492	588	1.61507	common
	L00-L08	I95-I99	NA	NA	NA	-9.54124	0.659285	3.82627e-18	0.00185402	381	4.47671	male unique
	K20-K31	C81-C96	J95-J99	NA	NA	-6.48756	0.969442	1.45167e-07	0.00185604	42	9.37123	male unique
	E70-E90	N17-N19	NA	NA	NA	-25.0984	0.25044	2.55235e-135	0.00186287	3185	4.69589	common
	K40-K46	I60-I69	N17-N19	NA	NA	-5.14958	1.22017	0.000301805	0.00186715	110	9.62055	male unique
	I10-I15	K55-K64	A30-A49	NA	NA	-12.664	0.495981	3.30579e-33	0.00187131	359	6.68219	male unique
	H00-H06	N17-N19	NA	NA	NA	-7.79166	0.806025	1.4047e-11	0.0018729	273	6.70137	common
	C64-C68	G90-G99	NA	NA	NA	-5.83242	1.07675	7.82308e-06	0.00187335	66	2.41781	male unique
	K20-K31	C76-C80	A30-A49	NA	NA	-8.6897	0.72264	8.91033e-15	0.00187429	133	4.32055	common
	K50-K52	K70-K77	NA	NA	NA	-7.59139	0.826915	6.47201e-11	0.00187821	360	4.86712	common
	I10-I15	M70-M79	I95-I99	NA	NA	-5.19334	1.20853	0.000243326	0.00188034	181	8.89041	male unique
	E10-E14	K55-K64	A30-A49	NA	NA	-8.07684	0.777062	1.48949e-12	0.00188052	160	7.20548	male unique
	C60-C63	I95-I99	NA	NA	NA	-7.23292	0.86767	9.04303e-10	0.0018813	204	2.79863	male unique
	I10-I15	M80-M85	A30-A49	NA	NA	-4.24497	1.47744	0.0187576	0.00188901	52	7.29041	male unique
	K50-K52	I26-I28	NA	NA	NA	-7.03536	0.891188	3.6569e-09	0.00189255	234	4.83562	common
	E10-E14	K65-K67	NA	NA	NA	-6.02663	1.03998	2.51957e-06	0.00189687	293	3.39452	male unique
	K55-K64	G90-G99	NA	NA	NA	-12.9527	0.483701	8.11928e-35	0.00190128	608	4.20685	common
	I20-I25	K55-K64	I60-I69	NA	NA	-6.52177	0.960026	1.16451e-07	0.0019092	239	8.85479	male unique
	I20-I25	I70-I79	C76-C80	NA	NA	-6.13161	1.02101	1.33885e-06	0.0019104	70	10.1397	male unique
	I30-I52	N17-N19	NA	NA	NA	-23.376	0.267714	3.6183e-117	0.00191488	2500	4.24795	common
	E10-E14	D60-D64	A30-A49	NA	NA	-6.51657	0.958377	1.20416e-07	0.00193949	101	9.42192	common
	J40-J47	K65-K67	NA	NA	NA	-5.16872	1.20787	0.000274826	0.00194373	289	3.67123	common
	N40-N51	I60-I69	NA	NA	NA	-11.035	0.565231	8.1431e-25	0.00195512	858	5.09726	male unique
	K40-K46	K55-K64	G90-G99	NA	NA	-5.78233	1.07823	1.03659e-05	0.00196026	82	8.79315	male unique
	I10-I15	I70-I79	N17-N19	NA	NA	-8.65593	0.720245	1.1944e-14	0.00196082	354	8.71233	male unique
	E10-E14	F10-F19	N17-N19	NA	NA	-6.56701	0.949161	8.6656e-08	0.00196327	147	8.35342	male unique
	I10-I15	I30-I52	N17-N19	NA	NA	-13.4002	0.464416	2.21822e-37	0.00198272	879	8.4274	common
	K20-K31	I60-I69	J09-J18	NA	NA	-5.67953	1.09545	1.85311e-05	0.00198596	121	9.01918	common
	M15-M19	G90-G99	NA	NA	NA	-9.08171	0.684147	2.73304e-16	0.00200278	370	4.21781	male unique
	I80-I89	J09-J18	NA	NA	NA	-17.3208	0.358612	1.40983e-63	0.00200631	1122	5.15068	common
	K20-K31	I30-I52	N17-N19	NA	NA	-9.53331	0.651334	4.12569e-18	0.0020105	419	9.69589	common
	J40-J47	C76-C80	I26-I28	NA	NA	-5.87154	1.05677	6.24327e-06	0.00201962	40	2.65479	male unique
	D37-D48	J90-J94	NA	NA	NA	-9.52136	0.651558	4.61511e-18	0.00202191	226	3.0589	common
	C15-C26	C76-C80	A30-A49	NA	NA	-10.0963	0.614324	1.64413e-20	0.00202458	170	1.85479	male unique
	K90-K93	A30-A49	NA	NA	NA	-11.2952	0.548602	4.44075e-26	0.00203644	357	2.67397	male unique
	C15-C26	K90-K93	NA	NA	NA	-12.9855	0.477096	5.30664e-35	0.00203894	716	0.679452	common
	N30-N39	K90-K93	NA	NA	NA	-9.91545	0.6245	1.00714e-19	0.00204532	845	4.21096	common
	I10-I15	M50-M54	N17-N19	NA	NA	-7.37902	0.839162	3.14615e-10	0.00204534	302	8.95068	male unique
	I10-I15	C60-C63	C76-C80	N17-N19	NA	-5.15942	1.19971	0.00028735	0.00205021	31	5.57534	male unique
	N40-N51	G90-G99	NA	NA	NA	-9.3829	0.659533	1.70334e-17	0.00205325	395	5.00548	male unique
	K20-K31	I60-I69	NA	NA	NA	-13.824	0.447446	6.88552e-40	0.00205912	1305	5.8411	common
	E10-E14	E70-E90	N17-N19	NA	NA	-10.461	0.590775	3.89641e-22	0.00207025	633	9.39452	male unique
	E70-E90	J90-J94	NA	NA	NA	-20.7814	0.297166	2.96887e-92	0.00207973	1710	2.58082	male unique
	D10-D36	C76-C80	I95-I99	NA	NA	-4.88892	1.26236	0.00107781	0.00208798	43	5.95616	male unique
	K50-K52	J90-J94	NA	NA	NA	-10.8263	0.570022	7.94661e-24	0.00208865	447	5.45479	common
	M50-M54	J95-J99	NA	NA	NA	-10.8286	0.569863	7.75187e-24	0.00208949	439	4.93699	common
	N20-N23	J90-J94	NA	NA	NA	-6.36892	0.968812	3.10474e-07	0.00209063	203	6.40274	male unique
	I80-I89	C76-C80	N17-N19	NA	NA	-7.17786	0.859255	1.34753e-09	0.00209624	62	5.63836	male unique
	C76-C80	I26-I28	NA	NA	NA	-13.731	0.448587	2.48571e-39	0.0021132	317	0.438356	common
	I10-I15	C76-C80	I26-I28	NA	NA	-8.15814	0.754056	7.70636e-13	0.00212987	104	3.05753	common
	K55-K64	N17-N19	NA	NA	NA	-24.2296	0.253477	5.29617e-126	0.00215135	2631	4.73973	common
	I10-I15	H53-H54	A30-A49	NA	NA	-5.17349	1.18701	0.000268597	0.00215283	54	6.8	male unique
	M45-M49	N17-N19	NA	NA	NA	-10.5278	0.583183	1.93492e-22	0.00215571	580	4.75068	common
	M50-M54	N17-N19	NA	NA	NA	-12.4999	0.490581	2.61895e-32	0.00217181	789	5.48493	common
	I10-I15	L00-L08	J90-J94	NA	NA	-6.34252	0.966731	3.65965e-07	0.0021733	112	7.46027	male unique
	E10-E14	C15-C26	J90-J94	NA	NA	-4.87857	1.2568	0.00113272	0.00217361	50	6.48356	male unique
	K20-K31	I30-I52	I95-I99	NA	NA	-6.56519	0.933418	8.76647e-08	0.00218078	233	9.16164	common
	K50-K52	A30-A49	NA	NA	NA	-11.522	0.531551	3.342e-27	0.00218852	433	4.6411	common
	I30-I52	J90-J94	NA	NA	NA	-17.4613	0.350746	1.22001e-64	0.00218863	1451	2.43288	male unique
	M70-M79	A30-A49	NA	NA	NA	-12.1016	0.506029	3.51938e-30	0.00219017	477	4.78904	common
	I10-I15	M45-M49	J09-J18	NA	NA	-6.98855	0.876137	5.06318e-09	0.00219202	157	6.54795	male unique
	M45-M49	I95-I99	NA	NA	NA	-7.99416	0.764821	2.8688e-12	0.00221146	287	3.97808	common
	E65-E68	N17-N19	NA	NA	NA	-11.4464	0.533927	7.96567e-27	0.00221711	709	3.27123	common
	D10-D36	A30-A49	NA	NA	NA	-13.7305	0.444773	2.50155e-39	0.00222729	540	4.87534	male unique
	D10-D36	E70-E90	J09-J18	NA	NA	-8.11327	0.752312	1.10916e-12	0.00223456	216	8.22055	male unique
	I10-I15	I95-I99	NA	NA	NA	-19.9728	0.305559	4.37174e-85	0.00223645	2210	4.79452	common
	L00-L08	J90-J94	NA	NA	NA	-10.5388	0.578959	1.72299e-22	0.00223939	380	4.53014	male unique
	H40-H42	J09-J18	NA	NA	NA	-8.0234	0.760264	2.28146e-12	0.0022431	167	2.85753	male unique
	I10-I15	H30-H36	I95-I99	NA	NA	-4.55723	1.33786	0.0049604	0.00224977	81	8.83014	common
	I10-I15	I60-I69	A30-A49	NA	NA	-7.88731	0.772974	6.66635e-12	0.00225031	122	6.92466	male unique
	K20-K31	I95-I99	NA	NA	NA	-15.4992	0.393264	1.42146e-50	0.0022535	1326	5.18356	common
	I80-I89	A30-A49	NA	NA	NA	-14.9317	0.40796	8.10308e-47	0.00226195	651	4.1726	common
	N20-N23	A30-A49	NA	NA	NA	-7.06207	0.862435	3.03808e-09	0.0022641	175	5.65205	male unique
	I10-I15	K20-K31	I30-I52	NA	NA	-9.5033	0.64069	5.47615e-18	0.00226843	819	8.13973	male unique
	K20-K31	C15-C26	I95-I99	NA	NA	-4.86429	1.25131	0.00120955	0.00227285	82	5.2411	common
	I10-I15	I60-I69	NA	NA	NA	-17.7642	0.342436	5.836e-67	0.00228108	2401	4.71233	common
	K20-K31	M50-M54	N17-N19	NA	NA	-5.36535	1.13359	9.9372e-05	0.00228331	162	11.0055	male unique
	I80-I89	M15-M19	J09-J18	NA	NA	-4.92466	1.23324	0.000906777	0.00230357	114	10.5753	common
	C81-C96	A30-A49	NA	NA	NA	-13.3129	0.456061	7.13139e-37	0.00230768	649	0.726027	male unique
	K50-K52	I30-I52	NA	NA	NA	-11.2721	0.538381	5.75833e-26	0.00231425	1192	5.69315	common
	D50-D53	K65-K67	NA	NA	NA	-4.2914	1.41391	0.0155358	0.00231665	134	1.09315	male unique
	J30-J39	J95-J99	NA	NA	NA	-9.51651	0.637019	4.83208e-18	0.00232928	336	6.61507	common
	K40-K46	M50-M54	N17-N19	NA	NA	-5.36883	1.12828	9.76334e-05	0.00234014	140	10.1068	male unique
	I20-I25	M15-M19	J09-J18	NA	NA	-7.47142	0.810554	1.59065e-10	0.00234378	222	10.3877	male unique
	D10-D36	J09-J18	NA	NA	NA	-16.4584	0.367818	3.05406e-57	0.00234916	1010	5.22877	male unique
	N40-N51	H25-H28	J09-J18	NA	NA	-4.73179	1.27891	0.00223661	0.00235428	77	7.48493	male unique
	N40-N51	N17-N19	NA	NA	NA	-17.9874	0.336406	1.07328e-68	0.00235533	1555	5.44384	male unique
	M50-M54	J90-J94	NA	NA	NA	-10.2078	0.592622	5.30636e-21	0.00235933	391	4.8137	common
	E70-E90	I95-I99	NA	NA	NA	-18.1481	0.333272	5.85828e-70	0.00236197	1652	3.63836	male unique
	I10-I15	H25-H28	N17-N19	NA	NA	-9.20213	0.657245	9.07833e-17	0.00236245	394	8.37123	common
	I20-I25	K55-K64	N17-N19	NA	NA	-10.2531	0.589818	3.33871e-21	0.00236386	555	10.4027	male unique
	I10-I15	N17-N19	NA	NA	NA	-30.1421	0.200243	6.93411e-196	0.00239169	5112	5.41233	common
	I60-I69	A30-A49	NA	NA	NA	-11.6899	0.515928	4.74287e-28	0.00240272	292	2.71096	male unique
	C81-C96	K90-K93	NA	NA	NA	-6.9779	0.863969	5.44411e-09	0.00240864	153	2.40822	male unique
	E10-E14	L80-L99	A00-A09	NA	NA	-5.29371	1.13736	0.000145388	0.00242756	91	11.1315	male unique
	K20-K31	N17-N19	NA	NA	NA	-23.1342	0.260228	1.01109e-114	0.00242928	2426	5.81644	common
	I10-I15	E65-E68	J09-J18	NA	NA	-6.96353	0.863951	6.01326e-09	0.00243905	219	8.93699	male unique
	M20-M25	K70-K77	NA	NA	NA	-7.12216	0.843693	1.98796e-09	0.00245675	374	5.70959	common
	H25-H28	C76-C80	J09-J18	NA	NA	-6.8894	0.872183	9.9896e-09	0.00245698	42	4.25479	male unique
	K40-K46	N17-N19	NA	NA	NA	-19.4544	0.308753	1.21101e-80	0.00246239	1968	6.60685	common
	K20-K31	C15-C26	J90-J94	NA	NA	-7.60828	0.788232	5.69157e-11	0.00248598	136	4.92329	common
	M15-M19	J95-J99	NA	NA	NA	-13.326	0.449411	5.99283e-37	0.00250657	711	4.66575	common
	E70-E90	I26-I28	NA	NA	NA	-13.5388	0.442305	3.42223e-38	0.00250804	721	2.90685	male unique
	K20-K31	E70-E90	D60-D64	J09-J18	NA	-4.09417	1.46222	0.0345302	0.00251225	47	11.5288	male unique
	E10-E14	H30-H36	I30-I52	NA	NA	-5.1771	1.15622	0.000264123	0.00251406	194	9.83973	male unique
	C81-C96	K70-K77	NA	NA	NA	-6.95759	0.859821	6.26518e-09	0.00252307	100	3.44795	male unique
	I70-I79	K65-K67	NA	NA	NA	-4.32027	1.38451	0.0137448	0.00252516	128	4.11233	male unique
	M15-M19	H25-H28	J09-J18	NA	NA	-5.10907	1.17073	0.000369394	0.00252542	63	7.58356	common
	C64-C68	N30-N39	N17-N19	NA	NA	-5.51417	1.08382	4.54868e-05	0.00253802	110	5.48082	male unique
	K70-K77	I95-I99	NA	NA	NA	-9.25603	0.644581	5.54223e-17	0.00256382	385	2.09315	common
	I80-I89	I30-I52	N17-N19	NA	NA	-7.42585	0.802948	2.23219e-10	0.00257329	214	8.71781	common
	I20-I25	M70-M79	D60-D64	NA	NA	-4.76537	1.25069	0.00191149	0.00257991	169	9.6137	male unique
	I20-I25	M15-M19	J95-J99	NA	NA	-5.48051	1.08708	5.45817e-05	0.00258564	131	10.2959	male unique
	I80-I89	J90-J94	NA	NA	NA	-13.9834	0.425968	7.46286e-41	0.00258898	728	5.34658	common
	E10-E14	C15-C26	J95-J99	NA	NA	-4.58515	1.29693	0.00437781	0.00261468	45	7.30137	male unique
	K20-K31	D37-D48	N17-N19	NA	NA	-6.18055	0.961707	9.92693e-07	0.00262185	71	6.49589	common
	I20-I25	M15-M19	I95-I99	NA	NA	-4.54643	1.3071	0.00519994	0.00262505	142	9.48493	male unique
	K20-K31	F30-F39	J09-J18	NA	NA	-6.44125	0.922432	1.95872e-07	0.00262779	141	9.23562	common
	I20-I25	M70-M79	I95-I99	NA	NA	-4.47592	1.32726	0.00714272	0.0026301	120	9.86986	male unique
	G40-G47	K70-K77	NA	NA	NA	-6.30982	0.941175	4.4753e-07	0.00263559	319	4.52877	male unique
	E10-E14	N17-N19	NA	NA	NA	-19.8653	0.298894	3.7235e-84	0.00263828	2262	6.05753	common
	D10-D36	N25-N29	NA	NA	NA	-4.31308	1.37579	0.0141678	0.00264819	287	5.31233	male unique
	F10-F19	I26-I28	NA	NA	NA	-9.50982	0.623923	5.14741e-18	0.00264947	282	2.43836	male unique
	N40-N51	E65-E68	N17-N19	NA	NA	-4.03319	1.46768	0.0440745	0.00268676	101	8.45205	male unique
	K20-K31	E70-E90	J90-J94	NA	NA	-9.33409	0.633915	2.68513e-17	0.00269321	334	8.36849	male unique
	I80-I89	N17-N19	NA	NA	NA	-17.9409	0.32956	2.47735e-68	0.00270513	1295	5.48493	common
	E10-E14	C15-C26	J09-J18	NA	NA	-4.98589	1.18504	0.000674132	0.00271637	59	7.10411	male unique
	I80-I89	E65-E68	N17-N19	NA	NA	-4.47527	1.32012	0.00715065	0.00271786	90	8.84932	common
	I80-I89	E70-E90	J09-J18	NA	NA	-8.13963	0.725792	8.9643e-13	0.00271849	213	9.27671	male unique
	C64-C68	A00-A09	NA	NA	NA	-5.65593	1.04331	2.10275e-05	0.00273694	154	2.48767	male unique
	I10-I15	D70-D77	J20-J22	NA	NA	-5.37343	1.09795	9.53274e-05	0.00274004	84	4.85205	male unique
	K55-K64	I60-I69	N17-N19	NA	NA	-5.14579	1.1462	0.00030769	0.00274471	115	6.52877	male unique
	J30-J39	K20-K31	N17-N19	NA	NA	-4.971	1.18638	0.000724018	0.00274624	113	12.1507	male unique
	L60-L75	B95-B98	NA	NA	NA	-4.44842	1.32491	0.00798451	0.00275667	256	7.19452	common
	H25-H28	C76-C80	NA	NA	NA	-14.1011	0.417795	1.42582e-41	0.00276322	377	3.80548	male unique
	I10-I15	K55-K64	I95-I99	NA	NA	-9.04375	0.651315	3.85296e-16	0.00276606	409	7.96438	male unique
	D37-D48	J09-J18	NA	NA	NA	-12.6446	0.465714	4.22796e-33	0.00277038	338	2.38082	common
	K00-K14	K90-K93	NA	NA	NA	-5.66714	1.03899	1.9791e-05	0.00277229	351	5.19726	common
	I10-I15	E65-E68	N17-N19	NA	NA	-7.84286	0.750683	9.41566e-12	0.0027739	390	8.49041	common
	I10-I15	N30-N39	A30-A49	NA	NA	-9.77877	0.601958	3.86794e-19	0.00277694	232	7.02192	male unique
	I20-I25	M45-M49	N17-N19	NA	NA	-5.36645	1.096	9.88532e-05	0.0027902	142	10.2589	male unique
	I10-I15	G40-G47	N17-N19	NA	NA	-7.3256	0.802445	4.64233e-10	0.00279928	305	8.67945	common
	I80-I89	I95-I99	NA	NA	NA	-11.6869	0.50286	4.90933e-28	0.00280347	770	4.10685	common
	I10-I15	M70-M79	N17-N19	NA	NA	-8.59765	0.683434	1.97395e-14	0.0028062	403	8.8411	common
	J30-J39	A30-A49	NA	NA	NA	-8.18576	0.717752	6.16421e-13	0.00280784	253	6.61096	common
	M70-M79	I60-I69	NA	NA	NA	-9.34764	0.628279	2.36882e-17	0.00281463	562	5.34932	common
	C60-C63	J90-J94	NA	NA	NA	-11.9354	0.491906	2.5969e-29	0.00281984	280	3.58767	male unique
	N30-N39	I95-I99	NA	NA	NA	-12.0975	0.48513	3.69984e-30	0.00282608	709	4.16164	common
	I60-I69	A00-A09	NA	NA	NA	-8.02822	0.729793	2.19545e-12	0.00285426	311	3.2274	male unique
	E10-E14	I30-I52	A00-A09	NA	NA	-5.97239	0.98012	3.48123e-06	0.00286937	206	9.85479	male unique
	C15-C26	I95-I99	NA	NA	NA	-11.7229	0.499075	3.21931e-28	0.00287815	334	0.975342	common
	H30-H36	N17-N19	NA	NA	NA	-9.53014	0.613778	4.25032e-18	0.00288166	484	5.02329	common
	M15-M19	J09-J18	NA	NA	NA	-17.7856	0.328782	3.99405e-67	0.00288689	1170	4.68356	common
	I10-I15	C60-C63	N17-N19	NA	NA	-7.87015	0.742989	7.60472e-12	0.00288728	180	7.24795	male unique
	I10-I15	H25-H28	C76-C80	NA	NA	-7.29688	0.801274	5.71073e-10	0.00288913	97	7.10685	male unique
	K40-K46	I60-I69	NA	NA	NA	-12.0449	0.485306	6.9779e-30	0.00289299	1117	5.94795	common
	D10-D36	E70-E90	I95-I99	NA	NA	-4.86991	1.19916	0.00118236	0.00290947	129	9.04384	male unique
	I60-I69	N17-N19	NA	NA	NA	-12.1713	0.478852	1.51238e-30	0.0029433	683	4.21918	male unique
	I20-I25	H25-H28	A00-A09	NA	NA	-4.81529	1.21012	0.00152426	0.00294672	105	10.874	male unique
	I20-I25	E65-E68	N17-N19	NA	NA	-6.498	0.896187	1.35928e-07	0.00295747	235	10.1178	common
	E10-E14	H30-H36	C76-C80	NA	NA	-5.07706	1.14693	0.00043162	0.0029587	33	11.6219	male unique
	I10-I15	E70-E90	A30-A49	NA	NA	-13.5938	0.428227	1.62429e-38	0.00296396	441	7.5589	male unique
	N40-N51	C76-C80	N17-N19	NA	NA	-8.01485	0.726127	2.43693e-12	0.00296819	85	5.42192	male unique
	I10-I15	B95-B98	A00-A09	NA	NA	-7.88004	0.737731	7.05623e-12	0.0029874	241	8.00274	male unique
	I10-I15	H30-H36	N17-N19	NA	NA	-6.80864	0.853669	1.73897e-08	0.00299046	199	8.57534	common
	J40-J47	C76-C80	I95-I99	NA	NA	-4.21871	1.37763	0.0209835	0.00299199	30	4.55616	male unique
	H25-H28	J90-J94	NA	NA	NA	-11.7401	0.494502	2.63216e-28	0.00301094	476	4.18219	common
	E10-E14	K90-K93	A30-A49	NA	NA	-4.75879	1.21956	0.00197095	0.00301659	61	6.68493	male unique
	N30-N39	K65-K67	NA	NA	NA	-5.16141	1.12225	0.000284561	0.00305073	276	2.95753	common
	M20-M25	N17-N19	NA	NA	NA	-13.0405	0.443793	2.59835e-35	0.00306634	963	6.46575	common
	K40-K46	K55-K64	I26-I28	NA	NA	-4.95412	1.16747	0.000785454	0.00307707	114	8.56027	male unique
	I20-I25	H25-H28	N17-N19	NA	NA	-7.34826	0.785766	3.93764e-10	0.00310725	256	11.0438	common
	I20-I25	M45-M49	J09-J18	NA	NA	-5.90562	0.977094	5.12583e-06	0.00311867	102	9.34247	male unique
	J40-J47	K90-K93	NA	NA	NA	-10.6802	0.540143	3.8249e-23	0.00312337	989	4.07123	common
	K20-K31	I70-I79	N17-N19	NA	NA	-5.68858	1.01406	1.76398e-05	0.00312424	197	8.87397	male unique
	M15-M19	C76-C80	N17-N19	NA	NA	-8.47685	0.679676	5.50674e-14	0.00314635	54	6.40411	male unique
	I20-I25	K55-K64	J95-J99	NA	NA	-8.48135	0.679125	5.3023e-14	0.00315145	225	9.45205	male unique
	K20-K31	C76-C80	J20-J22	NA	NA	-7.12973	0.807028	1.88657e-09	0.00317041	80	6.18493	common
	I20-I25	C15-C26	C76-C80	NA	NA	-7.93391	0.725218	4.61437e-12	0.00317067	175	6.87945	male unique
	H25-H28	N17-N19	NA	NA	NA	-14.4189	0.398903	1.52236e-43	0.0031773	964	4.23973	common
	I20-I25	N17-N19	NA	NA	NA	-21.534	0.267095	3.51861e-99	0.00317761	2753	6.9863	common
	I20-I25	K55-K64	K65-K67	NA	NA	-4.04023	1.42148	0.0428251	0.0032048	119	8.93699	male unique
	N40-N51	C76-C80	A30-A49	NA	NA	-7.64849	0.748415	4.19713e-11	0.00326582	85	5.38904	male unique
	E70-E90	K90-K93	NA	NA	NA	-15.3233	0.37331	2.14541e-49	0.00327857	1699	3.61096	male unique
	K40-K46	E70-E90	J90-J94	NA	NA	-8.93575	0.640154	1.01629e-15	0.00327887	272	8.43973	male unique
	H90-H95	A30-A49	NA	NA	NA	-6.7616	0.843714	2.39235e-08	0.00332975	129	2.43288	male unique
	E10-E14	I30-I52	NA	NA	NA	-16.792	0.339719	1.18174e-59	0.00333079	2603	4.76164	common
	D37-D48	L00-L08	NA	NA	NA	-5.83711	0.977012	7.61128e-06	0.0033362	168	4.38356	male unique
	C43-C44	N17-N19	NA	NA	NA	-9.39659	0.606904	1.49975e-17	0.0033365	412	4.44658	common
	M45-M49	I26-I28	NA	NA	NA	-6.34514	0.897649	3.60218e-07	0.00336034	155	2.56986	male unique
	K20-K31	F10-F19	J90-J94	NA	NA	-5.96537	0.95396	3.62223e-06	0.00337716	126	9.43014	common
	D10-D36	J90-J94	NA	NA	NA	-13.6715	0.416099	5.62497e-39	0.00338398	689	5.02192	male unique
	M15-M19	I95-I99	NA	NA	NA	-11.3936	0.499107	1.4536e-26	0.00339097	726	5.10137	common
	K55-K64	J90-J94	NA	NA	NA	-20.469	0.277745	1.8863e-89	0.00339601	1429	4.04658	common
	F30-F39	I95-I99	NA	NA	NA	-8.2076	0.691717	5.15613e-13	0.00342266	334	4.12192	male unique
	I10-I15	N30-N39	A00-A09	NA	NA	-7.15836	0.792908	1.54801e-09	0.0034275	294	7.60274	male unique
	E10-E14	K20-K31	I30-I52	NA	NA	-6.99472	0.811014	4.85604e-09	0.00343817	322	8.8589	male unique
	I20-I25	N30-N39	A30-A49	NA	NA	-7.50525	0.755427	1.23724e-10	0.00344901	122	9.66301	male unique
	K40-K46	I30-I52	NA	NA	NA	-17.8446	0.317665	1.39154e-67	0.00345264	3844	6.09178	common
	I20-I25	G40-G47	J95-J99	NA	NA	-5.37947	1.05265	9.27834e-05	0.00347313	80	10.7068	male unique
	D10-D36	K70-K77	NA	NA	NA	-8.45714	0.66956	6.49116e-14	0.00347359	448	4.37123	common
	K40-K46	N30-N39	J09-J18	NA	NA	-8.26326	0.685219	3.27157e-13	0.00347507	198	9.62192	male unique
	E10-E14	I70-I79	A00-A09	NA	NA	-5.03606	1.12351	0.000527968	0.00348921	107	11.1808	male unique
	I80-I89	M15-M19	A30-A49	NA	NA	-5.04831	1.11779	0.000497895	0.00354234	62	9.70822	male unique
	K40-K46	I30-I52	I95-I99	NA	NA	-6.60252	0.854427	6.88393e-08	0.00354801	216	9.45753	common
	I10-I15	E65-E68	C76-C80	NA	NA	-6.45382	0.873431	1.80613e-07	0.00356366	90	6.97123	male unique
	K50-K52	K65-K67	NA	NA	NA	-4.81695	1.17017	0.00151404	0.00356475	311	5.24932	common
	K20-K31	C15-C26	J09-J18	NA	NA	-7.23264	0.779309	9.05671e-10	0.00356545	149	5.46301	common
	D70-D77	J20-J22	NA	NA	NA	-9.42557	0.597882	1.14428e-17	0.00356931	300	1.33151	male unique
	M15-M19	N17-N19	NA	NA	NA	-17.2289	0.327038	6.92362e-63	0.0035725	1543	5.30137	common
	M70-M79	G90-G99	NA	NA	NA	-7.79363	0.722464	1.38358e-11	0.00358636	318	4.53151	male unique
	C64-C68	J90-J94	NA	NA	NA	-9.23142	0.609637	6.95209e-17	0.00359644	165	2.28767	male unique
	K20-K31	I30-I52	NA	NA	NA	-20.453	0.275125	2.61824e-89	0.00359893	4273	5.7589	common
	C15-C26	J20-J22	NA	NA	NA	-11.5511	0.48712	2.38918e-27	0.00360018	327	1.01096	common
	D10-D36	J20-J22	J09-J18	NA	NA	-4.98712	1.12799	0.000671086	0.00360499	77	7.4	male unique
	I10-I15	E65-E68	A00-A09	NA	NA	-4.3232	1.3002	0.0136096	0.00362088	169	8.54521	common
	I20-I25	M50-M54	N17-N19	NA	NA	-5.76814	0.973735	1.1237e-05	0.00363683	184	11.3973	male unique
	M70-M79	N17-N19	NA	NA	NA	-15.0369	0.373395	1.66969e-47	0.00364386	1088	5.48082	common
	F10-F19	C76-C80	NA	NA	NA	-18.5896	0.301631	1.73789e-73	0.00367136	582	2.06712	male unique
	N30-N39	J90-J94	NA	NA	NA	-14.2492	0.393424	1.73633e-42	0.00367577	666	4.53562	common
	I10-I15	H25-H28	J90-J94	NA	NA	-7.25798	0.772276	7.56341e-10	0.0036788	159	8.29041	common
	E10-E14	K20-K31	N17-N19	NA	NA	-8.52543	0.65739	3.64936e-14	0.00368115	377	9.20548	male unique
	K20-K31	K80-K87	A30-A49	NA	NA	-7.12569	0.786411	1.9407e-09	0.00368413	118	8.48904	male unique
	I10-I15	M15-M19	N17-N19	NA	NA	-9.40677	0.595097	1.3635e-17	0.00370548	527	8.85479	common
	E10-E14	J90-J94	NA	NA	NA	-15.9287	0.351408	1.64978e-53	0.00370721	888	4.34795	common
	I10-I15	K80-K87	A00-A09	NA	NA	-4.70043	1.19049	0.0025936	0.00371345	148	7.96849	male unique
	I20-I25	I70-I79	I95-I99	NA	NA	-5.20008	1.07479	0.000235658	0.00373875	142	10.0918	male unique
	G40-G47	N17-N19	NA	NA	NA	-11.93	0.468177	2.7676e-29	0.00375236	817	5.50959	common
	K50-K52	I95-I99	NA	NA	NA	-10.2852	0.543043	2.40014e-21	0.00375251	490	4.80959	common
	I10-I15	I60-I69	N17-N19	NA	NA	-7.77745	0.717657	1.56883e-11	0.00376675	294	8.60137	male unique
	K40-K46	K55-K64	N17-N19	NA	NA	-10.0602	0.554643	2.36545e-20	0.00377316	414	10.1288	male unique
	M70-M79	J20-J22	NA	NA	NA	-9.68098	0.576267	1.00174e-18	0.00377697	567	4.69041	common
	C64-C68	N17-N19	NA	NA	NA	-12.1643	0.458517	1.64506e-30	0.00378193	427	2.57808	male unique
	I10-I15	C76-C80	I95-I99	NA	NA	-7.84825	0.7096	9.02404e-12	0.00381383	105	5.96986	common
	K20-K31	K55-K64	N17-N19	NA	NA	-11.2685	0.494167	5.99222e-26	0.00381611	539	10.2329	male unique
	M20-M25	I95-I99	NA	NA	NA	-9.44829	0.589037	9.24096e-18	0.00382809	488	6.06164	common
	I80-I89	I30-I52	NA	NA	NA	-14.2573	0.390279	1.54659e-42	0.00383212	2381	5.7863	common
	N40-N51	J90-J94	NA	NA	NA	-14.7212	0.377964	1.84507e-45	0.00383317	833	4.97808	male unique
	I20-I25	M70-M79	I60-I69	NA	NA	-4.62532	1.20289	0.00363924	0.00383429	105	9.15616	male unique
	K40-K46	C76-C80	I95-I99	NA	NA	-5.45615	1.01864	6.20367e-05	0.00385704	56	7.70411	male unique
	G50-G59	I95-I99	NA	NA	NA	-7.4182	0.749184	2.36015e-10	0.00385804	279	5.13973	common
	I10-I15	K90-K93	NA	NA	NA	-17.0453	0.325961	1.61288e-61	0.00386373	2598	4.3589	common
	M70-M79	I95-I99	NA	NA	NA	-8.97974	0.618675	6.86903e-16	0.00386596	548	5.40411	common
	J30-J39	K20-K31	I30-I52	NA	NA	-4.43616	1.25217	0.00842513	0.00386868	146	11.1205	male unique
	I10-I15	H30-H36	J90-J94	NA	NA	-5.02161	1.10447	0.000566714	0.00390227	86	6.93288	common
	C64-C68	J20-J22	NA	NA	NA	-7.52742	0.736649	1.048e-10	0.00390669	131	2.29863	male unique
	N40-N51	I60-I69	J09-J18	NA	NA	-7.37388	0.751542	3.265e-10	0.00391956	68	7.1863	male unique
	I20-I25	E65-E68	J09-J18	NA	NA	-5.4188	1.0224	7.54831e-05	0.00392572	143	9.83014	male unique
	C81-C96	C76-C80	NA	NA	NA	-8.22921	0.672896	4.32697e-13	0.00393674	148	2.69178	male unique
	I20-I25	I95-I99	NA	NA	NA	-15.6076	0.354121	2.62337e-51	0.00397797	1543	5.06575	common
	C60-C63	J20-J22	NA	NA	NA	-9.86351	0.560305	1.67943e-19	0.0039796	253	3.1589	male unique
	C15-C26	C76-C80	NA	NA	NA	-22.5484	0.244902	6.65493e-109	0.00399726	1585	0.30137	common
	I70-I79	I95-I99	NA	NA	NA	-10.3607	0.532476	1.10655e-21	0.0040186	454	3.68356	male unique
	I10-I15	J90-J94	NA	NA	NA	-24.4274	0.22579	4.28181e-128	0.00402409	2350	3.82192	common
	G50-G59	J90-J94	NA	NA	NA	-10.1009	0.545611	1.57124e-20	0.00404146	295	5.30137	male unique
	I10-I15	D70-D77	NA	NA	NA	-14.5916	0.377539	1.23512e-44	0.00405053	992	3.70411	common
	D37-D48	I95-I99	NA	NA	NA	-8.22307	0.669806	4.54429e-13	0.00405476	168	3.21918	common
	K80-K87	C76-C80	NA	NA	NA	-16.4661	0.334365	2.6901e-57	0.00406358	399	1.64658	common
	K20-K31	K80-K87	J09-J18	NA	NA	-6.69759	0.822037	3.67402e-08	0.00406366	168	8.17671	male unique
	K40-K46	M15-M19	N17-N19	NA	NA	-6.50058	0.846914	1.33781e-07	0.00406466	238	10.6918	common
	K20-K31	C81-C96	I95-I99	NA	NA	-4.45364	1.23608	0.00780937	0.00406621	49	9.13425	male unique
	I10-I15	I70-I79	A00-A09	NA	NA	-6.20522	0.88644	8.54247e-07	0.00408448	192	8.88356	male unique
	E70-E90	K65-K67	NA	NA	NA	-7.83334	0.700585	1.0148e-11	0.00413645	534	2.68082	male unique
	K20-K31	J90-J94	NA	NA	NA	-20.0494	0.273688	9.41258e-86	0.00413909	1445	5.24932	common
	K55-K64	I60-I69	J09-J18	NA	NA	-6.71184	0.817538	3.34018e-08	0.00413947	106	7.51918	common
	I80-I89	M15-M19	N17-N19	NA	NA	-4.62748	1.18475	0.00360893	0.00415923	144	9.76986	common
	L80-L99	A00-A09	NA	NA	NA	-9.05689	0.605179	3.42484e-16	0.00416499	446	4.94795	common
	H00-H06	J09-J18	NA	NA	NA	-8.99344	0.60932	6.07607e-16	0.00416983	259	5.52055	male unique
	D37-D48	C76-C80	J09-J18	NA	NA	-6.77077	0.809247	2.24821e-08	0.00417257	47	4.33699	male unique
	I80-I89	J20-J22	NA	NA	NA	-11.2748	0.485962	5.5843e-26	0.00417295	689	5.51781	common
	I70-I79	C76-C80	NA	NA	NA	-12.9538	0.422815	8.00378e-35	0.00418159	304	3.98767	male unique
	I20-I25	K55-K64	C76-C80	NA	NA	-9.52193	0.575189	4.59134e-18	0.00418222	201	8.76986	male unique
	K20-K31	E70-E90	J20-J22	J09-J18	NA	-4.40135	1.24308	0.00975101	0.004206	40	12.9904	male unique
	H30-H36	J90-J94	NA	NA	NA	-8.05892	0.678508	1.71949e-12	0.00421947	219	3.23288	common
	M05-M14	J90-J94	NA	NA	NA	-11.4386	0.477836	8.71337e-27	0.0042291	517	3.46301	common
	N30-N39	N17-N19	NA	NA	NA	-17.7762	0.307416	4.72113e-67	0.00423367	1425	4.41096	common
	K20-K31	E70-E90	I95-I99	NA	NA	-7.63335	0.715856	4.70943e-11	0.00423495	290	9.26712	male unique
	J40-J47	J90-J94	NA	NA	NA	-16.2569	0.335799	8.30502e-56	0.00425759	990	3.57945	common
	K40-K46	C76-C80	D70-D77	NA	NA	-6.56136	0.831198	8.98962e-08	0.00428004	101	5.00822	male unique
	M70-M79	C76-C80	NA	NA	NA	-14.9334	0.364756	7.89861e-47	0.00430904	482	5.43562	male unique
	E10-E14	C76-C80	NA	NA	NA	-19.3772	0.281052	5.43486e-80	0.00431353	687	3.22466	common
	E10-E14	I80-I89	E70-E90	NA	NA	-5.25011	1.03721	0.000182863	0.00431591	192	7.05616	male unique
	I10-I15	I30-I52	NA	NA	NA	-26.5247	0.205049	2.50553e-151	0.00434438	7468	4.44658	common
	I20-I25	M15-M19	A30-A49	NA	NA	-5.79278	0.938529	9.78222e-06	0.00435385	87	9.4274	male unique
	K20-K31	M70-M79	C76-C80	NA	NA	-4.80882	1.12967	0.00157141	0.0043726	54	11.6137	male unique
	K40-K46	E70-E90	I26-I28	NA	NA	-5.77631	0.9395	1.0736e-05	0.00439698	100	8.87671	male unique
	K00-K14	I95-I99	NA	NA	NA	-7.89696	0.686095	6.17853e-12	0.00443571	267	4.64932	common
	I20-I25	I70-I79	A00-A09	NA	NA	-5.20532	1.04072	0.000229687	0.00443914	150	10.6822	male unique
	K40-K46	C60-C63	J09-J18	NA	NA	-5.33025	1.016	0.000119657	0.00444689	62	9.29178	male unique
	I10-I15	I26-I28	NA	NA	NA	-17.4924	0.309006	7.0884e-65	0.004493	1112	3.7863	common
	H25-H28	C76-C80	A30-A49	NA	NA	-4.86713	1.1105	0.00119343	0.00449423	37	4.16164	male unique
	I10-I15	K55-K64	C76-C80	NA	NA	-13.2881	0.406736	9.92217e-37	0.00449519	340	5.9	male unique
	I20-I25	G50-G59	J95-J99	NA	NA	-4.19939	1.28672	0.0226148	0.00450112	58	11.0548	male unique
	I30-I52	J20-J22	NA	NA	NA	-15.3022	0.352942	2.96552e-49	0.00451296	1255	3.06027	male unique
	K40-K46	M45-M49	N17-N19	NA	NA	-4.1647	1.29645	0.0260947	0.00451971	97	10.0575	common
	C15-C26	C76-C80	A00-A09	NA	NA	-7.23655	0.746028	8.81232e-10	0.00452261	121	1.48767	male unique
	G50-G59	I30-I52	NA	NA	NA	-9.05691	0.595762	3.42484e-16	0.00453576	964	5.34247	common
	E70-E90	J20-J22	NA	NA	NA	-17.365	0.310493	6.54432e-64	0.00455414	1496	3.20959	male unique
	K20-K31	I30-I52	J90-J94	NA	NA	-8.1228	0.663128	1.02727e-12	0.00457817	262	8.89863	male unique
	E10-E14	L80-L99	NA	NA	NA	-12.729	0.423138	1.44858e-33	0.00457968	1050	5.27123	common
	D10-D36	C76-C80	A00-A09	NA	NA	-5.81019	0.926269	8.84843e-06	0.00459954	73	5.0137	male unique
	J40-J47	C76-C80	NA	NA	NA	-20.4785	0.262668	1.55068e-89	0.00461212	797	3.03836	common
	K55-K64	C76-C80	I95-I99	NA	NA	-8.17777	0.656978	6.58394e-13	0.00464197	90	5.71644	male unique
	K20-K31	C15-C26	C76-C80	NA	NA	-11.7401	0.45717	2.63216e-28	0.00466707	269	4.29315	common
	D37-D48	C81-C96	J09-J18	NA	NA	-5.54335	0.967877	3.90217e-05	0.00467615	42	3.8	male unique
	N20-N23	J95-J99	NA	NA	NA	-6.38585	0.839881	2.79371e-07	0.00468519	176	6.37808	common
	I10-I15	K65-K67	NA	NA	NA	-9.33323	0.574344	2.70586e-17	0.0046986	841	3.57534	common
	K20-K31	C76-C80	NA	NA	NA	-26.7128	0.200605	1.6694e-153	0.00470697	1362	3.37945	common
	I10-I15	C76-C80	NA	NA	NA	-31.9606	0.167538	1.97172e-220	0.00472623	2063	3.37808	common
	I30-I52	K90-K93	NA	NA	NA	-13.4722	0.396942	8.42474e-38	0.00475923	1248	3.88356	male unique
	M80-M85	A00-A09	NA	NA	NA	-5.40993	0.988278	7.90228e-05	0.00476472	189	4.77534	common
	D10-D36	I95-I99	NA	NA	NA	-10.1187	0.528195	1.31167e-20	0.00477352	583	5.01644	male unique
	I10-I15	K20-K31	E70-E90	NA	NA	-9.61106	0.555127	1.96394e-18	0.00481818	897	6.23014	common
	F10-F19	A00-A09	NA	NA	NA	-11.6194	0.459164	1.08085e-27	0.00481887	663	2.78356	male unique
	H53-H54	J09-J18	NA	NA	NA	-7.15447	0.745602	1.58839e-09	0.00482287	180	3.30274	common
	I10-I15	N40-N51	N17-N19	NA	NA	-10.1501	0.525044	9.54809e-21	0.00484785	517	8.96164	male unique
	E10-E14	N30-N39	D60-D64	NA	NA	-5.37369	0.99126	9.5272e-05	0.00485998	141	7.86027	male unique
	K20-K31	C15-C26	I26-I28	NA	NA	-4.76453	1.11771	0.00191754	0.00486666	51	3.47945	male unique
	D50-D53	C76-C80	NA	NA	NA	-11.8176	0.450529	1.05466e-28	0.00487238	264	0.967123	common
	K20-K31	E70-E90	J20-J22	NA	NA	-8.29614	0.641538	2.48977e-13	0.00488155	275	8.83288	male unique
	G40-G47	I95-I99	NA	NA	NA	-8.23007	0.646503	4.29953e-13	0.004889	427	4.76712	common
	E10-E14	C15-C26	C76-C80	NA	NA	-8.21334	0.647509	4.91991e-13	0.00490154	135	5.48493	male unique
	E10-E14	G50-G59	N17-N19	NA	NA	-5.15108	1.03227	0.00029966	0.00490587	148	9.63699	male unique
	K40-K46	E65-E68	N17-N19	NA	NA	-5.37623	0.987662	9.41661e-05	0.00494246	105	10.2466	common
	J40-J47	C76-C80	A30-A49	NA	NA	-7.5316	0.704548	1.01547e-10	0.00495986	78	3.96712	male unique
	I80-I89	E70-E90	NA	NA	NA	-16.3202	0.3248	2.95717e-56	0.00498765	3297	5.53425	common
	C15-C26	A00-A09	NA	NA	NA	-12.3767	0.428255	1.21299e-31	0.00498971	436	1.03973	common
	H25-H28	I95-I99	NA	NA	NA	-9.64758	0.54938	1.382e-18	0.00499064	394	4.50548	common
	I20-I25	M70-M79	N17-N19	NA	NA	-7.36166	0.71935	3.57109e-10	0.00501356	244	11.4603	male unique
	K20-K31	D70-D77	NA	NA	NA	-12.4379	0.42576	5.67441e-32	0.00501373	682	3.78493	common
	I10-I15	M50-M54	I95-I99	NA	NA	-5.8386	0.906853	7.5486e-06	0.00501783	126	7.61918	male unique
	N10-N16	A00-A09	NA	NA	NA	-6.91362	0.765796	8.46166e-09	0.00501953	187	3.81918	common
	I20-I25	M15-M19	N17-N19	NA	NA	-7.30774	0.724104	5.28695e-10	0.00503389	311	11.0904	male unique
	K40-K46	C60-C63	N17-N19	NA	NA	-6.27312	0.842538	5.62685e-07	0.00506531	93	8.95342	male unique
	K40-K46	D70-D77	J20-J22	NA	NA	-4.18506	1.26268	0.0239757	0.00506999	52	7.43836	male unique
	M50-M54	I95-I99	NA	NA	NA	-8.5492	0.61796	2.98209e-14	0.00507685	406	5.50959	common
	M70-M79	I26-I28	NA	NA	NA	-7.72257	0.684051	2.38958e-11	0.00507902	355	4.16164	common
	I80-I89	I30-I52	J90-J94	NA	NA	-5.98097	0.883091	3.30721e-06	0.00508357	133	9.50411	male unique
	G50-G59	K70-K77	NA	NA	NA	-5.53246	0.954093	4.13132e-05	0.00510016	203	5.46027	common
	F10-F19	K65-K67	NA	NA	NA	-5.95507	0.8859	3.84491e-06	0.00511491	209	2.05479	male unique
	D10-D36	C76-C80	J20-J22	NA	NA	-6.31024	0.835175	4.46601e-07	0.0051428	65	5.18356	male unique
	K40-K46	K70-K77	NA	NA	NA	-10.5755	0.497876	1.16855e-22	0.00516778	762	5.44932	common
	K50-K52	J20-J22	NA	NA	NA	-8.72811	0.603222	6.37061e-15	0.00516944	473	4.44932	common
	N40-N51	I95-I99	NA	NA	NA	-12.3318	0.426503	2.11101e-31	0.00519752	768	4.7726	male unique
	I10-I15	C43-C44	N17-N19	NA	NA	-5.62801	0.934326	2.452e-05	0.00520367	155	8.18356	male unique
	J30-J39	J09-J18	NA	NA	NA	-11.0629	0.475221	5.97176e-25	0.00520919	504	6.53973	common
	E10-E14	K55-K64	N17-N19	NA	NA	-9.64072	0.545108	1.47487e-18	0.00522011	398	8.51096	male unique
	K40-K46	I30-I52	N17-N19	NA	NA	-9.16364	0.572789	1.295e-16	0.00525364	361	9.66027	common
	K20-K31	M15-M19	C76-C80	NA	NA	-7.49293	0.700256	1.35718e-10	0.00526347	104	9.56575	male unique
	D37-D48	C81-C96	NA	NA	NA	-7.31446	0.717259	5.0366e-10	0.00526666	207	0.953425	male unique
	I10-I15	C15-C26	C76-C80	NA	NA	-12.5901	0.416639	8.41996e-33	0.00527105	331	4.86027	male unique
	K55-K64	I95-I99	NA	NA	NA	-16.5172	0.317006	1.15695e-57	0.00532124	1319	3.95068	common
	M05-M14	C76-C80	NA	NA	NA	-14.1267	0.370376	9.92079e-42	0.00534174	382	2.5726	male unique
	K20-K31	C81-C96	J20-J22	NA	NA	-4.18269	1.2498	0.024199	0.00536676	64	5.73973	male unique
	K40-K46	D70-D77	NA	NA	NA	-11.6151	0.449996	1.13619e-27	0.00537094	544	5.55479	male unique
	C64-C68	N30-N39	C76-C80	NA	NA	-7.21455	0.724205	1.033e-09	0.00538137	88	3.77397	male unique
	I20-I25	M15-M19	J90-J94	NA	NA	-5.25546	0.993567	0.000178076	0.00539844	126	10.5315	male unique
	K40-K46	C60-C63	C76-C80	NA	NA	-6.20462	0.841122	8.56979e-07	0.00541358	94	9.25068	male unique
	I10-I15	M45-M49	N17-N19	NA	NA	-6.99152	0.745438	4.95978e-09	0.00545215	240	8.44795	common
	K40-K46	C76-C80	NA	NA	NA	-23.3887	0.222714	2.69353e-117	0.00546728	1129	4.78356	common
	M50-M54	I26-I28	NA	NA	NA	-6.65575	0.782621	4.8338e-08	0.00546753	217	5.82192	common
	K20-K31	E70-E90	NA	NA	NA	-22.5981	0.230486	2.16433e-109	0.00546968	6191	5.56164	common
	K50-K52	I30-I52	I95-I99	NA	NA	-4.43487	1.17321	0.00846658	0.00549992	80	7.1	common
	C15-C26	D70-D77	NA	NA	NA	-11.9086	0.436701	3.57732e-29	0.00551383	385	0.50411	common
	I20-I25	L80-L99	NA	NA	NA	-13.5785	0.382685	1.9978e-38	0.00553703	1297	5.87671	male unique
	K50-K52	I30-I52	J90-J94	NA	NA	-4.06914	1.27609	0.0382683	0.00555765	76	8.50685	male unique
	C76-C80	A00-A09	NA	NA	NA	-15.1228	0.343156	4.56813e-48	0.00557497	413	0.717808	common
	N20-N23	K55-K64	C76-C80	NA	NA	-4.46517	1.16019	0.00744038	0.00562552	35	9.97534	male unique
	I20-I25	I26-I28	A00-A09	NA	NA	-4.04884	1.2788	0.041483	0.00564119	48	8.74384	male unique
	K40-K46	N30-N39	J90-J94	NA	NA	-6.3734	0.810992	3.01922e-07	0.00569157	116	9.60685	male unique
	I20-I25	C76-C80	NA	NA	NA	-21.6357	0.238681	3.91239e-100	0.00571861	911	5.91507	male unique
	K20-K31	I26-I28	NA	NA	NA	-13.0704	0.395055	1.75783e-35	0.00572145	678	4.53973	common
	I20-I25	I26-I28	NA	NA	NA	-11.9863	0.430219	1.41399e-29	0.00576057	617	5.24384	common
	K40-K46	K65-K67	NA	NA	NA	-6.42931	0.799978	2.11507e-07	0.00583835	612	4.74521	male unique
	I80-I89	L80-L99	NA	NA	NA	-11.247	0.457177	7.63357e-26	0.00584672	1058	4.9137	male unique
	M15-M19	D50-D53	C76-C80	NA	NA	-4.20162	1.22249	0.0224728	0.00587853	29	5.03562	male unique
	E10-E14	K90-K93	NA	NA	NA	-10.923	0.470215	2.77701e-24	0.00588035	880	4.40137	common
	K40-K46	C76-C80	J20-J22	NA	NA	-7.97911	0.643635	3.22783e-12	0.00588332	77	7.1863	common
	K55-K64	C76-C80	I26-I28	NA	NA	-6.88408	0.745546	1.03531e-08	0.00590241	75	4.12877	male unique
	E10-E14	D70-D77	NA	NA	NA	-9.18111	0.558563	1.1021e-16	0.00592704	325	3.33699	common
	K20-K31	C76-C80	A00-A09	NA	NA	-6.24381	0.821282	6.74277e-07	0.00592881	101	5.01096	common
	K50-K52	K90-K93	NA	NA	NA	-8.29272	0.618144	2.56141e-13	0.00593971	852	4.70274	common
	K20-K31	K65-K67	NA	NA	NA	-8.10551	0.63184	1.1813e-12	0.00596778	670	4.7726	common
	E10-E14	M05-M14	I95-I99	NA	NA	-5.40014	0.947838	8.31674e-05	0.00598523	98	8.76575	male unique
	I20-I25	C76-C80	A30-A49	NA	NA	-7.36125	0.695254	3.58005e-10	0.00598832	83	7.82466	male unique
	K55-K64	D70-D77	J20-J22	NA	NA	-4.70523	1.08743	0.00253574	0.00599633	69	4.53699	male unique
	I10-I15	K80-K87	C76-C80	NA	NA	-8.41276	0.607694	9.42325e-14	0.00602173	92	6.88767	male unique
	E65-E68	A00-A09	NA	NA	NA	-6.19508	0.823599	9.08211e-07	0.006083	333	3.26027	common
	M50-M54	J20-J22	NA	NA	NA	-8.63541	0.590696	1.42427e-14	0.00609123	488	4.10822	male unique
	I20-I25	M05-M14	I95-I99	NA	NA	-6.09096	0.837208	1.71042e-06	0.00610037	145	9.49315	male unique
	K20-K31	C15-C26	J20-J22	NA	NA	-5.67435	0.898184	1.90447e-05	0.00611746	77	5.94247	male unique
	D37-D48	J20-J22	NA	NA	NA	-9.09922	0.55995	2.33182e-16	0.00612664	215	2.68493	common
	E10-E14	D60-D64	A00-A09	NA	NA	-6.07805	0.837873	1.84828e-06	0.00614184	112	9.6	common
	K20-K31	L80-L99	NA	NA	NA	-14.0331	0.362803	3.71658e-41	0.0061503	1520	5.6	male unique
	E70-E90	D60-D64	NA	NA	NA	-18.7576	0.271409	7.50082e-75	0.00615197	2077	3.29589	male unique
	M70-M79	I60-I69	J09-J18	NA	NA	-4.39866	1.15505	0.00985737	0.00621571	45	7.95068	common
	I20-I25	C64-C68	N17-N19	NA	NA	-4.31967	1.17431	0.0137669	0.00626587	69	10.7452	male unique
	N40-N51	C60-C63	N17-N19	NA	NA	-5.46513	0.928085	5.92083e-05	0.00626919	90	7.59589	male unique
	G40-G47	J90-J94	NA	NA	NA	-9.29447	0.545653	3.88776e-17	0.00627266	399	4.40548	common
	I80-I89	I70-I79	J09-J18	NA	NA	-5.40757	0.936445	7.99193e-05	0.00632088	72	8.14932	male unique
	K40-K46	J90-J94	NA	NA	NA	-17.8139	0.283965	2.4099e-67	0.00635504	1223	6.03836	common
	I10-I15	K55-K64	J20-J22	NA	NA	-9.23415	0.54779	6.7819e-17	0.00635585	378	7.28082	male unique
	N20-N23	N17-N19	NA	NA	NA	-8.57964	0.589331	2.29933e-14	0.00636941	415	6.42192	common
	K20-K31	C15-C26	D60-D64	NA	NA	-8.20715	0.616011	5.17327e-13	0.00637293	143	5.09863	male unique
	I10-I15	I80-I89	D60-D64	NA	NA	-6.41927	0.786918	2.25391e-07	0.00640012	240	8.05479	male unique
	C64-C68	K90-K93	NA	NA	NA	-6.25429	0.806186	6.32532e-07	0.00646001	151	2.96712	male unique
	C15-C26	N10-N16	NA	NA	NA	-8.29839	0.607332	2.44421e-13	0.00647455	170	2.05068	common
	K55-K64	K65-K67	NA	NA	NA	-8.07313	0.624108	1.53487e-12	0.00648344	938	2.45753	common
	N20-N23	I95-I99	NA	NA	NA	-6.38001	0.789555	2.89869e-07	0.00649081	174	5.54658	male unique
	N40-N51	I26-I28	NA	NA	NA	-11.4582	0.439459	6.96382e-27	0.00650361	453	4.58904	male unique
	N20-N23	K55-K64	N17-N19	NA	NA	-4.47596	1.12385	0.00714272	0.00653686	92	10.0356	male unique
	M15-M19	J90-J94	NA	NA	NA	-13.6466	0.368267	7.90403e-39	0.00656762	758	4.64521	common
	C64-C68	C76-C80	NA	NA	NA	-14.3541	0.350107	3.87186e-43	0.00656857	438	1.71644	male unique
	I20-I25	J90-J94	NA	NA	NA	-16.7345	0.300287	3.10006e-59	0.00657051	1592	3.76027	common
	F10-F19	D60-D64	NA	NA	NA	-12.6437	0.397029	4.27605e-33	0.00660513	735	2.59452	male unique
	I10-I15	M70-M79	J20-J22	NA	NA	-5.50233	0.911935	4.84999e-05	0.0066193	167	8.78904	male unique
	I80-I89	C76-C80	NA	NA	NA	-19.8871	0.252249	2.41553e-84	0.00662765	722	4.95616	male unique
	C60-C63	I26-I28	NA	NA	NA	-8.04018	0.623747	1.99684e-12	0.00663737	181	2.84384	male unique
	K40-K46	I95-I99	NA	NA	NA	-13.2595	0.377479	1.44974e-36	0.00670302	1033	6.12603	common
	E10-E14	C15-C26	NA	NA	NA	-13.0736	0.38224	1.68648e-35	0.00675643	556	4.49041	male unique
	H53-H54	A00-A09	NA	NA	NA	-4.64586	1.07481	0.0033223	0.00678247	145	3.27945	common
	I20-I25	N40-N51	I60-I69	NA	NA	-5.69939	0.875535	1.66051e-05	0.00680558	167	9.73973	male unique
	I10-I15	J20-J22	NA	NA	NA	-19.6695	0.2536	1.79749e-82	0.00681802	2132	4.30274	common
	K20-K31	C76-C80	D60-D64	NA	NA	-8.31919	0.598964	2.05747e-13	0.0068542	129	4.31233	male unique
	I80-I89	M15-M19	C76-C80	NA	NA	-5.22313	0.953771	0.000210057	0.00686262	48	9.95068	male unique
	E70-E90	B95-B98	NA	NA	NA	-17.3346	0.286605	1.11073e-63	0.00695582	2014	3.1274	male unique
	C81-C96	D70-D77	NA	NA	NA	-11.8012	0.420584	1.27972e-28	0.00698914	744	0.50137	male unique
	I10-I15	L80-L99	A00-A09	NA	NA	-5.79372	0.856597	9.73459e-06	0.00699276	147	9.25205	male unique
	K50-K52	K80-K87	NA	NA	NA	-7.39093	0.671218	2.88698e-10	0.00700644	563	4.6274	male unique
	I80-I89	E70-E90	N17-N19	NA	NA	-7.93414	0.624987	4.60806e-12	0.00702182	257	9.51781	common
	K20-K31	C76-C80	D70-D77	NA	NA	-6.1251	0.809475	1.392e-06	0.00702613	112	3.86164	male unique
	D37-D48	A00-A09	NA	NA	NA	-8.06724	0.614559	1.6085e-12	0.00702841	232	3.0274	common
	I20-I25	C76-C80	J20-J22	NA	NA	-8.04007	0.615923	1.99765e-12	0.00706885	69	7.48767	male unique
	K40-K46	I30-I52	J90-J94	NA	NA	-7.765	0.637715	1.72516e-11	0.00707026	218	8.90959	male unique
	N40-N51	C76-C80	NA	NA	NA	-21.7577	0.227204	2.76098e-101	0.00713012	870	3.83288	male unique
	C15-C26	D60-D64	NA	NA	NA	-15.6139	0.316597	2.37925e-51	0.00713095	558	0.786301	common
	E10-E14	E70-E90	NA	NA	NA	-16.6461	0.296398	1.35895e-58	0.00719869	4081	3.64658	male unique
	I20-I25	I70-I79	N17-N19	NA	NA	-7.95307	0.620276	3.97021e-12	0.00720415	276	9.66301	male unique
	I10-I15	C76-C80	D60-D64	NA	NA	-12.2419	0.40292	6.38128e-31	0.00720844	225	4.16438	common
	C15-C26	B95-B98	NA	NA	NA	-10.9243	0.451517	2.73827e-24	0.00720852	504	0.706849	common
	K20-K31	N30-N39	A30-A49	NA	NA	-7.39625	0.665259	2.7778e-10	0.00729604	136	9.81918	male unique
	N40-N51	K90-K93	NA	NA	NA	-10.0195	0.490925	3.55879e-20	0.00730769	1065	4.62466	male unique
	D10-D36	C64-C68	C76-C80	NA	NA	-4.52826	1.08595	0.00565583	0.0073178	34	6.99178	male unique
	G50-G59	A00-A09	NA	NA	NA	-7.07023	0.695393	2.86916e-09	0.00732403	351	5.67123	common
	I10-I15	N10-N16	A00-A09	NA	NA	-4.98165	0.986595	0.000687826	0.00733669	70	7.94384	male unique
	K00-K14	D60-D64	J09-J18	NA	NA	-5.41834	0.906888	7.56154e-05	0.00734431	52	7.4411	male unique
	I10-I15	C76-C80	A00-A09	NA	NA	-9.54106	0.514892	3.8313e-18	0.00735325	160	5.1589	common
	K55-K64	J20-J22	NA	NA	NA	-17.6039	0.278865	9.97971e-66	0.00737902	1387	3.83288	common
	K55-K64	C76-C80	NA	NA	NA	-26.6955	0.183841	2.6465e-153	0.00738921	1606	2.43562	male unique
	I30-I52	D60-D64	NA	NA	NA	-15.5139	0.316302	1.13106e-50	0.00739401	1442	3.18082	male unique
	G50-G59	D60-D64	NA	NA	NA	-7.51063	0.652459	1.18868e-10	0.00744376	388	4.62877	common
	C15-C26	N30-N39	NA	NA	NA	-10.5175	0.465845	2.15555e-22	0.00745	495	1.41644	male unique
	E10-E14	L00-L08	NA	NA	NA	-9.44819	0.518143	9.24625e-18	0.00748005	984	5.28493	common
	J40-J47	A00-A09	NA	NA	NA	-12.0517	0.405973	6.43514e-30	0.00750137	928	4.1863	common
	C15-C26	I26-I28	NA	NA	NA	-11.9063	0.410491	3.67675e-29	0.00754079	266	0.59726	common
	M15-M19	H25-H28	N17-N19	NA	NA	-5.53382	0.88315	4.1046e-05	0.00754257	113	8.54795	common
	C60-C63	A30-A49	NA	NA	NA	-11.7203	0.416701	3.31972e-28	0.00756785	315	2.46301	male unique
	I80-I89	K65-K67	NA	NA	NA	-5.89515	0.828258	5.43925e-06	0.00757651	334	4.24384	common
	I10-I15	L80-L99	NA	NA	NA	-18.3126	0.266523	2.90751e-71	0.00759158	2426	4.64658	common
	I70-I79	A00-A09	NA	NA	NA	-9.73712	0.500746	5.80902e-19	0.00762884	433	3.73973	common
	I20-I25	K55-K64	A00-A09	NA	NA	-6.69856	0.72785	3.65187e-08	0.00763089	269	9.88493	male unique
	K20-K31	I60-I69	N17-N19	NA	NA	-6.2015	0.78529	8.73587e-07	0.00767356	131	10.2959	male unique
	C15-C26	C76-C80	D70-D77	NA	NA	-7.56068	0.643831	8.15587e-11	0.00769027	144	0.854795	common
	F10-F19	D70-D77	NA	NA	NA	-9.03725	0.538588	4.08391e-16	0.00769367	263	1.60822	male unique
	C76-C80	D70-D77	NA	NA	NA	-14.6883	0.331279	2.99327e-45	0.00770469	529	0.345205	common
	N20-N23	G90-G99	NA	NA	NA	-5.06364	0.960865	0.000460264	0.00770813	100	4.43151	male unique
	M70-M79	J90-J94	NA	NA	NA	-11.576	0.420192	1.79123e-27	0.0077186	565	5.01096	common
	I20-I25	K55-K64	I95-I99	NA	NA	-7.16744	0.678519	1.45336e-09	0.00772537	271	9.9589	male unique
	K40-K46	N30-N39	I26-I28	NA	NA	-4.30258	1.12986	0.0147886	0.00774041	56	10.3973	male unique
	E10-E14	I26-I28	NA	NA	NA	-10.24	0.47468	3.82036e-21	0.00774501	382	3.78767	male unique
	N40-N51	C60-C63	C76-C80	NA	NA	-7.32394	0.663548	4.69806e-10	0.00775218	114	6.35616	male unique
	I20-I25	J20-J22	NA	NA	NA	-14.1096	0.34428	1.26457e-41	0.00776876	1490	4.75342	common
	I20-I25	H25-H28	J90-J94	NA	NA	-5.93207	0.817637	4.38828e-06	0.00782615	107	8.96986	common
	E10-E14	C15-C26	D60-D64	NA	NA	-4.92158	0.985501	0.000918573	0.00782662	52	7.23836	male unique
	C81-C96	J20-J22	NA	NA	NA	-10.0661	0.481664	2.2314e-20	0.00784052	391	1.87671	male unique
	I10-I15	I30-I52	D60-D64	NA	NA	-9.87826	0.490125	1.4529e-19	0.00789459	471	7.63288	male unique
	I80-I89	B95-B98	NA	NA	NA	-11.2332	0.430882	8.90649e-26	0.00790571	1053	4.98356	common
	J30-J39	K20-K31	J95-J99	NA	NA	-4.42704	1.09255	0.00874071	0.00793268	65	9.08767	male unique
	M15-M19	C76-C80	NA	NA	NA	-19.2316	0.251451	9.07797e-79	0.00794018	666	4.46712	common
	I10-I15	F30-F39	I95-I99	NA	NA	-4.79832	1.00708	0.00165283	0.00796819	110	8.01918	male unique
	H00-H06	J20-J22	NA	NA	NA	-6.54458	0.737929	1.00117e-07	0.00799107	164	5.88767	common
	K20-K31	N10-N16	NA	NA	NA	-8.88054	0.543769	1.66135e-15	0.00799478	500	5.09041	common
	K80-K87	A00-A09	NA	NA	NA	-8.93436	0.539366	1.02873e-15	0.00807576	476	4.11233	common
	C60-C63	A00-A09	NA	NA	NA	-8.40361	0.573094	1.01619e-13	0.00809863	314	3.11233	male unique
	K20-K31	K80-K87	A00-A09	NA	NA	-4.86887	0.988503	0.00118638	0.00812437	149	9.8137	male unique
	K20-K31	F30-F39	A00-A09	NA	NA	-4.27656	1.12415	0.0164371	0.00816819	119	9.26849	male unique
	I10-I15	C76-C80	D70-D77	NA	NA	-8.53175	0.563309	3.45805e-14	0.00818039	160	4.16301	common
	D10-D36	C76-C80	NA	NA	NA	-19.1021	0.251507	1.09093e-77	0.00819432	841	3.72055	common
	M50-M54	A00-A09	NA	NA	NA	-7.62523	0.62929	5.0059e-11	0.00824225	568	4.92329	common
	K20-K31	C15-C26	D70-D77	NA	NA	-6.64957	0.721304	5.03537e-08	0.00825977	72	2.87397	common
	K20-K31	E65-E68	N17-N19	NA	NA	-4.63084	1.03538	0.00355436	0.00827351	149	9.82192	common
	M15-M19	C76-C80	A00-A09	NA	NA	-5.82237	0.823007	8.26212e-06	0.00829712	47	5.49041	male unique
	K55-K64	I26-I28	NA	NA	NA	-13.6196	0.35062	1.14395e-38	0.00843562	717	3.46027	common
	M15-M19	I26-I28	NA	NA	NA	-9.24543	0.516437	6.11491e-17	0.00844074	452	3.72055	common
	H30-H36	D60-D64	NA	NA	NA	-6.25516	0.763134	6.29397e-07	0.00845051	324	4.48082	male unique
	C60-C63	B95-B98	NA	NA	NA	-9.68228	0.492919	9.89853e-19	0.00845857	367	2.99452	male unique
	D10-D36	E70-E90	NA	NA	NA	-15.4072	0.30976	5.89526e-50	0.0084589	3167	5.62192	male unique
	C81-C96	B95-B98	NA	NA	NA	-9.51162	0.501051	5.06067e-18	0.00851597	351	1.30411	male unique
	G50-G59	K80-K87	NA	NA	NA	-5.42742	0.877157	7.23268e-05	0.00855962	322	5.78904	male unique
	I80-I89	A00-A09	NA	NA	NA	-11.4818	0.414292	5.31162e-27	0.00859308	949	5.66849	common
	D10-D36	D60-D64	NA	NA	NA	-11.9856	0.396847	1.42525e-29	0.0085961	837	4.95068	common
	J30-J39	E70-E90	NA	NA	NA	-8.89064	0.534908	1.51833e-15	0.00860273	1551	6.87671	common
	E10-E14	E65-E68	J09-J18	NA	NA	-5.42624	0.876029	7.26249e-05	0.00862106	140	9.03014	male unique
	N30-N39	C76-C80	NA	NA	NA	-21.0049	0.226294	2.75955e-94	0.00862331	711	3.23288	male unique
	C15-C26	K90-K93	A30-A49	NA	NA	-4.47353	1.06235	0.00718942	0.00863043	42	2.89178	male unique
	K20-K31	J20-J22	NA	NA	NA	-15.4292	0.307733	4.20166e-50	0.00866848	1315	5.36438	common
	K50-K52	I70-I79	NA	NA	NA	-5.76271	0.823263	1.15964e-05	0.00870179	408	4.93014	common
	E10-E14	D60-D64	NA	NA	NA	-13.7094	0.345679	3.34149e-39	0.00874683	1435	5.0411	common
	I30-I52	A00-A09	NA	NA	NA	-14.3422	0.330168	4.58466e-43	0.00877942	1168	4.1274	common
	I20-I25	N30-N39	D60-D64	NA	NA	-5.82753	0.812448	8.03292e-06	0.00878626	169	9.60274	male unique
	M20-M25	F40-F48	NA	NA	NA	-4.44118	1.06504	0.00824886	0.00882609	467	6.25479	common
	I26-I28	A00-A09	NA	NA	NA	-7.29061	0.648546	5.97048e-10	0.00884151	192	2.09452	male unique
	M15-M19	C76-C80	D60-D64	NA	NA	-7.53806	0.626187	9.66907e-11	0.00891311	71	5.60548	common
	E70-E90	A00-A09	NA	NA	NA	-17.3203	0.272284	1.42342e-63	0.0089507	1701	4.40274	common
	B95-B98	A00-A09	NA	NA	NA	-10.9737	0.429436	1.59384e-24	0.00898235	633	3.61918	male unique
	I10-I15	I60-I69	A00-A09	NA	NA	-5.85392	0.804732	6.90415e-06	0.00899723	123	8.13151	male unique
	M20-M25	J20-J22	NA	NA	NA	-8.58579	0.548612	2.1813e-14	0.00900236	527	5.41918	common
	E10-E14	J20-J22	NA	NA	NA	-11.6677	0.403652	6.14645e-28	0.00900756	861	4.6274	male unique
	E10-E14	N10-N16	NA	NA	NA	-6.85676	0.686629	1.2482e-08	0.00902237	321	3.79726	male unique
	E10-E14	N30-N39	D50-D53	NA	NA	-4.26182	1.10385	0.017499	0.00905525	117	8.06027	male unique
	I10-I15	N30-N39	C76-C80	NA	NA	-10.318	0.454365	1.71301e-21	0.00920362	170	6.22329	male unique
	I10-I15	C60-C63	C76-C80	NA	NA	-8.82797	0.530626	2.65e-15	0.00923875	164	5.8589	male unique
	D10-D36	J20-J22	NA	NA	NA	-10.7096	0.437001	2.78749e-23	0.00927791	611	5.04658	male unique
	D37-D48	C76-C80	NA	NA	NA	-13.1339	0.355124	7.63634e-36	0.00942708	356	0.965753	common
	C64-C68	M45-M49	NA	NA	NA	-6.72944	0.692996	2.97382e-08	0.00943364	150	3.2589	male unique
	K00-K14	J20-J22	NA	NA	NA	-8.79847	0.529583	3.43834e-15	0.00947101	325	4.07123	male unique
	D10-D36	C76-C80	A30-A49	NA	NA	-8.02149	0.58087	2.31189e-12	0.00947175	95	5.96438	male unique
	M70-M79	K90-K93	NA	NA	NA	-7.80049	0.597239	1.31293e-11	0.00947825	733	4.75068	common
	C60-C63	G90-G99	NA	NA	NA	-10.0313	0.464191	3.1612e-20	0.00950017	162	3	male unique
	I20-I25	K55-K64	D70-D77	NA	NA	-5.65144	0.823382	2.1512e-05	0.00953021	104	9.58356	male unique
	N20-N23	D60-D64	NA	NA	NA	-5.72888	0.812134	1.4032e-05	0.0095366	233	4.85753	male unique
	H30-H36	D70-D77	NA	NA	NA	-5.67741	0.819398	1.87485e-05	0.00954197	89	3.72603	male unique
	C81-C96	L00-L08	NA	NA	NA	-6.03325	0.770793	2.4201e-06	0.0095579	193	1.96438	male unique
	I20-I25	N30-N39	A00-A09	NA	NA	-5.71361	0.813695	1.53299e-05	0.0095699	162	10.0671	male unique
	K40-K46	E70-E90	J20-J22	NA	NA	-7.55131	0.615299	8.75147e-11	0.00959689	202	9.48767	male unique
	C64-C68	I95-I99	NA	NA	NA	-6.99246	0.663976	4.92929e-09	0.00963044	150	2.07671	male unique
	D10-D36	C76-C80	D60-D64	NA	NA	-7.44274	0.623713	1.96648e-10	0.00963716	87	6.27397	common
	I10-I15	D50-D53	C76-C80	NA	NA	-7.13689	0.648749	1.79674e-09	0.00975431	87	7.95342	male unique
	K40-K46	N30-N39	C76-C80	NA	NA	-8.31395	0.556597	2.14755e-13	0.00977896	93	9.98356	male unique
	K20-K31	I30-I52	J20-J22	NA	NA	-7.34922	0.628276	3.91155e-10	0.00987903	224	9.15342	male unique
	K20-K31	M70-M79	N17-N19	NA	NA	-6.73619	0.684057	2.84048e-08	0.00997233	220	10.7863	common
	I20-I25	C15-C26	NA	NA	NA	-12.3937	0.371653	9.81659e-32	0.00999003	662	6.13699	male unique
	F10-F19	C76-C80	D60-D64	NA	NA	-5.85105	0.785339	7.01939e-06	0.0101016	53	2.35068	male unique
	I20-I25	C76-C80	D60-D64	NA	NA	-8.52884	0.538763	3.54479e-14	0.010102	103	7.00822	male unique
	K40-K46	I30-I52	J20-J22	NA	NA	-6.1107	0.750556	1.51965e-06	0.0101892	177	8.33973	male unique
	K55-K64	D70-D77	NA	NA	NA	-13.541	0.338591	3.32135e-38	0.0102052	758	2.90548	common
	E10-E14	K20-K31	N30-N39	NA	NA	-5.53563	0.828161	4.06563e-05	0.01021	198	7.99452	male unique
	K20-K31	H25-H28	J90-J94	NA	NA	-6.23568	0.735021	7.09376e-07	0.0102205	104	9.34521	common
	I10-I15	I30-I52	A00-A09	NA	NA	-9.577	0.478548	2.72429e-18	0.0102236	430	8.38082	common
	M05-M14	A00-A09	NA	NA	NA	-9.59331	0.47725	2.32784e-18	0.0102712	630	3.59041	common
	K40-K46	E70-E90	NA	NA	NA	-19.5347	0.234348	2.53286e-81	0.0102762	5289	5.93973	common
	I20-I25	K55-K64	J20-J22	NA	NA	-7.30212	0.626848	5.50971e-10	0.0102824	257	9.58904	male unique
	I10-I15	M50-M54	D60-D64	NA	NA	-5.22037	0.876302	0.000212762	0.0103102	183	8.34795	male unique
	C60-C63	C76-C80	D60-D64	NA	NA	-12.2979	0.371418	3.2061e-31	0.0103822	126	3.60548	male unique
	I10-I15	H30-H36	D60-D64	NA	NA	-4.04886	1.1273	0.041483	0.0104175	118	7.77808	male unique
	I20-I25	K65-K67	NA	NA	NA	-5.49379	0.830801	5.08653e-05	0.0104177	366	5.54932	common
	J40-J47	D70-D77	NA	NA	NA	-9.1046	0.500443	2.22007e-16	0.0105005	353	3.03014	common
	D60-D64	A00-A09	NA	NA	NA	-12.9898	0.350441	5.01956e-35	0.0105443	581	2.69041	common
	N40-N51	C76-C80	D60-D64	NA	NA	-9.1612	0.496851	1.32358e-16	0.0105487	106	5.16986	male unique
	K55-K64	E65-E68	N17-N19	NA	NA	-4.7531	0.956805	0.0020205	0.0105905	143	7.89041	common
	E10-E14	B95-B98	NA	NA	NA	-13.1945	0.344151	3.4312e-36	0.0106639	1265	4.69863	common
	K80-K87	D70-D77	NA	NA	NA	-8.48244	0.534648	5.25513e-14	0.0107256	206	2.14795	common
	K20-K31	D60-D64	NA	NA	NA	-17.5365	0.258605	3.27201e-65	0.0107268	2108	4.36438	male unique
	C76-C80	D60-D64	NA	NA	NA	-23.8475	0.190141	5.21932e-122	0.0107334	703	0.646575	common
	C15-C26	K65-K67	NA	NA	NA	-7.75727	0.584351	1.82845e-11	0.0107488	466	0.787671	common
	K20-K31	L00-L08	J90-J94	NA	NA	-6.04894	0.748158	2.20018e-06	0.0108286	83	7.74795	male unique
	C64-C68	D70-D77	NA	NA	NA	-5.77104	0.784102	1.10613e-05	0.0108338	86	2.04521	male unique
	E10-E14	A00-A09	NA	NA	NA	-11.9043	0.380003	3.76406e-29	0.0108491	1036	5.59041	common
	H25-H28	A00-A09	NA	NA	NA	-9.10666	0.496418	2.18009e-16	0.0108813	444	4.31644	common
	J30-J39	E70-E90	J20-J22	NA	NA	-4.14824	1.08969	0.0278424	0.0108859	61	8.89589	male unique
	I20-I25	K90-K93	NA	NA	NA	-12.2763	0.368207	4.17889e-31	0.0108866	1562	5.30959	common
	I20-I25	N10-N16	NA	NA	NA	-7.9173	0.570644	5.26952e-12	0.0109113	386	5.87123	common
	I10-I15	E70-E90	NA	NA	NA	-26.4684	0.170309	1.11648e-150	0.0110228	10459	3.4411	common
	D10-D36	E70-E90	I26-I28	NA	NA	-4.86791	0.925633	0.0011899	0.0110437	61	8.66027	male unique
	I20-I25	C76-C80	A00-A09	NA	NA	-7.0049	0.642198	4.52293e-09	0.0111253	84	8.76986	male unique
	J40-J47	D60-D64	NA	NA	NA	-14.5365	0.309251	2.76009e-44	0.0111599	1041	3.99452	common
	I10-I15	C15-C26	NA	NA	NA	-19.4827	0.230637	6.98494e-81	0.0111822	1352	3.85068	male unique
	C43-C44	C76-C80	NA	NA	NA	-13.2966	0.337896	8.86207e-37	0.0111885	425	2.65205	common
	I10-I15	I26-I28	A00-A09	NA	NA	-4.83949	0.927654	0.00135901	0.0112277	78	6.40411	male unique
	K40-K46	F10-F19	I95-I99	NA	NA	-4.30672	1.04018	0.0145311	0.0113363	99	8.97808	male unique
	D37-D48	C81-C96	D70-D77	NA	NA	-4.64924	0.96326	0.00328156	0.0113512	49	1.87397	male unique
	D37-D48	D70-D77	NA	NA	NA	-9.40674	0.475593	1.3635e-17	0.0114042	326	1.4726	male unique
	E10-E14	E70-E90	B95-B98	NA	NA	-7.77737	0.573983	1.5691e-11	0.0115153	360	8.7411	male unique
	N20-N23	K70-K77	NA	NA	NA	-4.24962	1.04935	0.0184153	0.0115702	131	5.83014	male unique
	M50-M54	L80-L99	NA	NA	NA	-7.72092	0.576939	2.41953e-11	0.0116261	530	4.90137	male unique
	N20-N23	J20-J22	NA	NA	NA	-5.70943	0.779864	1.56996e-05	0.0116485	173	5.25205	male unique
	J30-J39	G90-G99	NA	NA	NA	-5.17792	0.859804	0.000263196	0.0116553	151	6.54521	male unique
	I10-I15	K55-K64	A00-A09	NA	NA	-9.2311	0.482187	6.96994e-17	0.0116655	496	7.6863	male unique
	J40-J47	C76-C80	D70-D77	NA	NA	-6.07812	0.732186	1.84828e-06	0.0116749	59	2.43836	male unique
	K40-K46	C76-C80	D60-D64	NA	NA	-10.1851	0.436585	6.6844e-21	0.0117176	121	6.14247	male unique
	I20-I25	B95-B98	NA	NA	NA	-13.3687	0.332342	3.38787e-37	0.011761	1629	5.3589	common
	K20-K31	D70-D77	J20-J22	NA	NA	-5.02542	0.883843	0.000557081	0.0117761	61	5.72877	male unique
	E10-E14	N40-N51	N17-N19	NA	NA	-6.4032	0.693202	2.50133e-07	0.0118111	234	8.90274	male unique
	C60-C63	C76-C80	NA	NA	NA	-17.8303	0.248922	1.79831e-67	0.0118154	778	2.09452	male unique
	I10-I15	K80-K87	NA	NA	NA	-15.1259	0.292337	4.36099e-48	0.0120119	2061	4.27671	male unique
	G50-G59	J20-J22	NA	NA	NA	-7.15063	0.617899	1.6309e-09	0.012054	304	4.80822	common
	I20-I25	G50-G59	J09-J18	NA	NA	-6.10707	0.723321	1.55053e-06	0.0120659	94	10.8945	male unique
	C81-C96	L80-L99	NA	NA	NA	-7.74079	0.570495	2.07575e-11	0.0120815	196	3.05479	male unique
	K50-K52	L80-L99	NA	NA	NA	-7.61102	0.579773	5.57735e-11	0.0121228	527	5.0137	common
	N20-N23	K90-K93	NA	NA	NA	-4.79505	0.920186	0.0016768	0.0121268	246	7.00137	common
	I20-I25	N30-N39	C76-C80	NA	NA	-6.91205	0.637664	8.55083e-09	0.0121848	86	9.31233	male unique
	J40-J47	C76-C80	D60-D64	NA	NA	-6.86262	0.642233	1.20069e-08	0.0121868	65	4.66301	common
	N40-N51	M45-M49	N17-N19	NA	NA	-5.16768	0.850437	0.000275888	0.0123415	91	9.32877	male unique
	I10-I15	B95-B98	NA	NA	NA	-19.4654	0.225382	9.7911e-81	0.0124363	2983	4.16438	common
	K80-K87	K65-K67	NA	NA	NA	-5.96869	0.734195	3.55642e-06	0.012498	477	0.484932	male unique
	I10-I15	L00-L08	A00-A09	NA	NA	-6.1673	0.710421	1.07601e-06	0.0125081	150	8.45205	common
	N30-N39	D60-D64	NA	NA	NA	-14.8144	0.295655	4.64718e-46	0.0125259	907	3.4411	male unique
	N40-N51	D60-D64	NA	NA	NA	-14.4358	0.303346	1.19272e-43	0.0125375	1075	4.28767	male unique
	K50-K52	D60-D64	NA	NA	NA	-10.9857	0.397938	1.39807e-24	0.0126309	695	4.32329	common
	K40-K46	D60-D64	NA	NA	NA	-15.6559	0.278764	1.23162e-51	0.0127233	1570	5.33562	male unique
	I20-I25	D70-D77	NA	NA	NA	-10.2665	0.42478	2.91143e-21	0.0127654	430	5.50411	common
	I80-I89	D70-D77	NA	NA	NA	-9.12871	0.477451	1.78365e-16	0.0127975	415	4.2	common
	E10-E14	K80-K87	NA	NA	NA	-10.0095	0.434692	3.93403e-20	0.0128932	781	4.76164	male unique
	I10-I15	H25-H28	A00-A09	NA	NA	-6.5494	0.663937	9.70541e-08	0.0129277	154	8.8589	common
	K40-K46	K55-K64	C76-C80	NA	NA	-9.22289	0.471046	7.51331e-17	0.0129792	185	9.20548	male unique
	I10-I15	D60-D64	NA	NA	NA	-22.7082	0.191202	1.77986e-110	0.0130124	3100	4.08493	common
	I20-I25	N40-N51	J20-J22	NA	NA	-5.39378	0.804751	8.60331e-05	0.0130281	126	9.95205	male unique
	M20-M25	D60-D64	NA	NA	NA	-10.224	0.42447	4.49861e-21	0.0130392	725	5.27123	common
	H30-H36	D50-D53	NA	NA	NA	-4.847	0.894156	0.00130981	0.0131153	251	5.14795	male unique
	I10-I15	A00-A09	NA	NA	NA	-18.4295	0.235138	3.37747e-72	0.0131217	2414	5.16712	common
	J30-J39	B95-B98	NA	NA	NA	-6.91581	0.626604	8.3364e-09	0.0131219	448	6.20685	common
	C64-C68	D60-D64	NA	NA	NA	-9.6294	0.44997	1.64498e-18	0.0131289	252	1.80548	male unique
	E10-E14	H25-H28	A00-A09	NA	NA	-4.52093	0.958358	0.00583661	0.0131324	100	10.1918	common
	I80-I89	K80-K87	NA	NA	NA	-9.06291	0.477874	3.2453e-16	0.0131553	798	5.4589	male unique
	M50-M54	B95-B98	NA	NA	NA	-8.67772	0.498855	9.88035e-15	0.0131818	644	4.80959	common
	C60-C63	D60-D64	NA	NA	NA	-15.094	0.28663	7.05839e-48	0.013215	462	2.73836	male unique
	K20-K31	E70-E90	D50-D53	NA	NA	-5.34352	0.80899	0.00011158	0.013262	297	10.2219	male unique
	D10-D36	A00-A09	NA	NA	NA	-10.831	0.399059	7.56092e-24	0.0132708	829	5.47397	male unique
	K50-K52	F30-F39	NA	NA	NA	-5.558	0.77434	3.60749e-05	0.0135173	531	5.83288	common
	E10-E14	I80-I89	NA	NA	NA	-10.3043	0.417105	1.97072e-21	0.0135959	1254	4.16575	male unique
	I20-I25	M05-M14	A00-A09	NA	NA	-5.32196	0.807512	0.000124929	0.0136019	133	9.97808	male unique
	K20-K31	E70-E90	D60-D64	NA	NA	-9.22593	0.465656	7.30911e-17	0.0136215	394	9.11233	male unique
	E10-E14	I70-I79	NA	NA	NA	-9.59609	0.447533	2.26679e-18	0.0136425	1015	5.44658	male unique
	N40-N51	A00-A09	NA	NA	NA	-11.3492	0.378403	2.40776e-26	0.0136426	930	5.24795	male unique
	K40-K46	H25-H28	J90-J94	NA	NA	-5.51976	0.777407	4.41653e-05	0.0136899	83	9.67945	male unique
	N20-N23	B95-B98	NA	NA	NA	-5.08691	0.843184	0.000411618	0.0137159	328	5.11644	male unique
	F10-F19	D50-D53	NA	NA	NA	-7.91206	0.541892	5.48586e-12	0.0137394	464	3.04247	male unique
	M50-M54	K80-K87	NA	NA	NA	-6.15616	0.696441	1.1515e-06	0.0137406	478	5.2863	male unique
	G40-G47	A00-A09	NA	NA	NA	-7.40074	0.57891	2.68823e-10	0.0137824	490	5.07945	common
	D10-D36	K80-K87	NA	NA	NA	-7.73621	0.550902	2.1508e-11	0.0140956	753	5.06027	male unique
	I20-I25	A00-A09	NA	NA	NA	-13.5813	0.313372	1.92586e-38	0.0141791	1314	6.62466	common
	N40-N51	I60-I69	N17-N19	NA	NA	-5.14127	0.827167	0.000314906	0.0142259	80	8.21096	male unique
	C15-C26	K50-K52	NA	NA	NA	-9.8837	0.430012	1.37757e-19	0.0142627	426	0.773973	male unique
	K20-K31	C15-C26	K65-K67	NA	NA	-4.05635	1.04597	0.0402247	0.0143667	84	7.03151	common
	I10-I15	M45-M49	A00-A09	NA	NA	-5.20427	0.814592	0.000230794	0.0144169	139	7.33973	common
	I80-I89	I70-I79	NA	NA	NA	-7.93886	0.533819	4.44224e-12	0.0144377	750	5.48767	common
	I10-I15	L00-L08	NA	NA	NA	-13.7367	0.30818	2.29865e-39	0.0145032	2097	4.49041	common
	K40-K46	I70-I79	NA	NA	NA	-10.0577	0.420713	2.42585e-20	0.0145322	1132	6.25068	male unique
	D37-D48	B95-B98	NA	NA	NA	-7.74515	0.545817	2.00871e-11	0.0145898	244	1.87397	male unique
	K00-K14	D60-D64	NA	NA	NA	-9.05318	0.466066	3.53696e-16	0.0147078	358	4.67534	male unique
	K40-K46	J20-J22	NA	NA	NA	-14.3486	0.293927	4.18735e-43	0.0147364	1061	6.18356	common
	C81-C96	A00-A09	NA	NA	NA	-10.0358	0.418196	3.02167e-20	0.0150417	358	1.54658	male unique
	M15-M19	C76-C80	I95-I99	NA	NA	-4.69762	0.892503	0.00262685	0.0151064	33	6.01096	male unique
	I10-I15	N10-N16	NA	NA	NA	-12.0778	0.34709	4.69359e-30	0.0151148	857	4.03836	male unique
	L00-L08	A00-A09	NA	NA	NA	-9.21072	0.454849	8.39625e-17	0.0151541	428	4.65342	common
	I80-I89	D60-D64	NA	NA	NA	-12.9963	0.321802	4.61353e-35	0.0152642	1041	4.33973	male unique
	N20-N23	A00-A09	NA	NA	NA	-5.7303	0.729768	1.39349e-05	0.0152711	280	6.24795	common
	K50-K52	B95-B98	NA	NA	NA	-9.16148	0.456238	1.32072e-16	0.0153013	661	4.34521	common
	I10-I15	M05-M14	A00-A09	NA	NA	-6.09527	0.684459	1.66717e-06	0.015422	231	8.40822	common
	K50-K52	N30-N39	NA	NA	NA	-8.613	0.483201	1.72956e-14	0.0155794	942	4.65616	male unique
	J40-J47	F40-F48	NA	NA	NA	-7.97012	0.521928	3.46363e-12	0.0156102	621	4.57534	common
	N20-N23	C76-C80	NA	NA	NA	-9.43541	0.440262	1.04295e-17	0.0157006	169	6.49041	male unique
	N30-N39	D50-D53	NA	NA	NA	-8.42139	0.493075	8.76529e-14	0.0157269	645	4.61918	common
	D10-D36	I70-I79	NA	NA	NA	-7.69716	0.538132	2.89785e-11	0.0158897	645	5	male unique
	I20-I25	K80-K87	NA	NA	NA	-10.8263	0.381819	7.94847e-24	0.0160239	1161	5.95342	male unique
	M50-M54	D60-D64	NA	NA	NA	-9.88416	0.418206	1.37184e-19	0.0160248	570	4.03836	common
	K20-K31	I70-I79	NA	NA	NA	-10.188	0.405705	6.49347e-21	0.0160296	1432	5.71233	common
	D37-D48	C15-C26	NA	NA	NA	-7.89253	0.52275	6.3992e-12	0.0161503	297	0.153425	common
	K55-K64	C76-C80	D70-D77	NA	NA	-7.29535	0.565497	5.7728e-10	0.0161554	120	2.92192	male unique
	M70-M79	D60-D64	NA	NA	NA	-11.5185	0.357775	3.47976e-27	0.0162277	782	5.04384	common
	K50-K52	A00-A09	NA	NA	NA	-10.3455	0.398305	1.29389e-21	0.0162337	906	5.93014	common
	I20-I25	D60-D64	A00-A09	NA	NA	-6.57276	0.625912	8.3521e-08	0.0163428	131	9.73151	common
	M15-M19	K80-K87	NA	NA	NA	-9.75224	0.421526	5.01471e-19	0.0163944	864	4.84658	male unique
	K55-K64	N10-N16	NA	NA	NA	-10.4309	0.393673	5.33586e-22	0.0164675	613	3.89315	male unique
	J40-J47	B95-B98	NA	NA	NA	-13.2838	0.308594	1.04966e-36	0.0165839	1217	3.67945	common
	C60-C63	N10-N16	NA	NA	NA	-9.81373	0.417206	2.74156e-19	0.0166666	227	2.33699	male unique
	N30-N39	A00-A09	NA	NA	NA	-12.4495	0.328138	4.91451e-32	0.0168207	864	4.61233	common
	K40-K46	C60-C63	J20-J22	NA	NA	-4.79016	0.852589	0.0017098	0.0168393	47	9.17808	male unique
	E10-E14	I60-I69	A00-A09	NA	NA	-4.15091	0.983688	0.0275518	0.0168534	60	9.66164	male unique
	N40-N51	J20-J22	NA	NA	NA	-12.1067	0.336977	3.31158e-30	0.0169129	752	4.66849	male unique
	D10-D36	K90-K93	NA	NA	NA	-9.36353	0.434897	2.04441e-17	0.0170404	1097	4.70137	common
	K20-K31	L00-L08	NA	NA	NA	-10.4919	0.385951	2.82026e-22	0.0174336	1241	5.54247	common
	M15-M19	J20-J22	NA	NA	NA	-10.8664	0.372238	5.1423e-24	0.0175117	720	4.67123	common
	I10-I15	F40-F48	NA	NA	NA	-10.8221	0.373671	8.31213e-24	0.017529	1439	4.54247	common
	D10-D36	K65-K67	NA	NA	NA	-5.17599	0.780831	0.000265473	0.0175698	400	3.74658	common
	E70-E90	N25-N29	NA	NA	NA	-8.48867	0.475261	4.98481e-14	0.0176974	614	4.04247	male unique
	M70-M79	N25-N29	NA	NA	NA	-4.77523	0.843938	0.00182374	0.0177744	209	5.07397	male unique
	K50-K52	F40-F48	NA	NA	NA	-4.81702	0.83654	0.00151404	0.017781	312	6.68356	common
	G40-G47	D70-D77	NA	NA	NA	-5.82913	0.690615	7.9621e-06	0.0178512	178	4.91507	male unique
	E10-E14	K55-K64	I60-I69	NA	NA	-4.82571	0.833573	0.00145089	0.0179067	152	8.4137	male unique
	M15-M19	B95-B98	NA	NA	NA	-10.1807	0.395052	6.99237e-21	0.0179189	1199	4.21644	common
	K40-K46	D50-D53	C76-C80	NA	NA	-5.08468	0.789804	0.000415758	0.0180268	55	9.20548	male unique
	K20-K31	I60-I69	A00-A09	NA	NA	-4.93641	0.811743	0.000856212	0.0181861	68	8.70822	male unique
	I80-I89	F10-F19	NA	NA	NA	-7.79613	0.513835	1.35716e-11	0.0182074	1330	6.45068	male unique
	K40-K46	C81-C96	A00-A09	NA	NA	-4.83179	0.82882	0.00140996	0.0182301	58	7.36027	male unique
	K50-K52	M05-M14	NA	NA	NA	-5.46571	0.731588	5.90607e-05	0.0183404	747	5.44658	common
	I20-I25	G50-G59	N17-N19	NA	NA	-4.53864	0.879033	0.00538996	0.0185068	140	11.4	male unique
	M45-M49	A00-A09	NA	NA	NA	-8.04008	0.495819	1.99765e-12	0.0185661	386	3.60137	common
	G40-G47	K90-K93	NA	NA	NA	-6.19207	0.643496	9.25108e-07	0.0186004	533	4.95616	common
	M70-M79	A00-A09	NA	NA	NA	-9.17049	0.433356	1.21585e-16	0.0187965	692	5.41233	common
	I20-I25	D60-D64	NA	NA	NA	-15.5956	0.254812	3.16645e-51	0.0187992	1814	5.14247	common
	K20-K31	H25-H28	A00-A09	NA	NA	-4.52072	0.876755	0.00583661	0.0189952	100	9.72603	common
	E10-E14	G50-G59	NA	NA	NA	-6.60019	0.600196	6.9848e-08	0.0190363	858	4.57945	common
	K20-K31	K80-K87	NA	NA	NA	-12.8242	0.308781	4.27402e-34	0.0190653	2047	3.8137	common
	K55-K64	C76-C80	D60-D64	NA	NA	-11.5792	0.341841	1.72593e-27	0.0190966	141	5	male unique
	K55-K64	A00-A09	NA	NA	NA	-15.8817	0.249011	3.4877e-53	0.0191641	1931	4.72055	common
	I10-I15	N30-N39	NA	NA	NA	-18.2748	0.216234	5.81546e-71	0.0192233	4463	3.89315	common
	J30-J39	L80-L99	NA	NA	NA	-6.72029	0.587977	3.15764e-08	0.0192282	443	5.6	common
	E10-E14	I30-I52	D50-D53	NA	NA	-4.6813	0.843918	0.00283345	0.0192424	192	9.80137	male unique
	I20-I25	K80-K87	A00-A09	NA	NA	-4.47519	0.882594	0.00715065	0.019259	88	10.0932	male unique
	C64-C68	B95-B98	NA	NA	NA	-7.61273	0.518808	5.50687e-11	0.0192634	243	2.27123	male unique
	E00-E07	A00-A09	NA	NA	NA	-5.31462	0.742518	0.000129859	0.019328	195	3.1589	common
	K40-K46	I70-I79	J09-J18	NA	NA	-5.78388	0.679176	1.02781e-05	0.0196777	99	9.12603	male unique
	F30-F39	D50-D53	NA	NA	NA	-5.65398	0.694299	2.12114e-05	0.0197312	330	3.4274	male unique
	J30-J39	F10-F19	NA	NA	NA	-5.71377	0.686665	1.53268e-05	0.0197729	680	8.06301	common
	I20-I25	C76-C80	D70-D77	NA	NA	-5.99697	0.654132	3.0095e-06	0.0197854	74	6.94521	male unique
	I10-I15	N30-N39	D60-D64	NA	NA	-8.33658	0.470395	1.77953e-13	0.0198118	290	6.83562	male unique
	K20-K31	A00-A09	NA	NA	NA	-15.1462	0.258656	3.20298e-48	0.0198874	1772	5.4589	common
	E10-E14	C76-C80	D60-D64	NA	NA	-7.9358	0.492978	4.54894e-12	0.019997	66	4.64932	common
	K20-K31	C81-C96	D70-D77	NA	NA	-5.61607	0.696534	2.6158e-05	0.0200048	109	6.03562	male unique
[truncated: 678 more rows]

## Sheet: 10. F trajectory hosp risk
	Diagnosis 1	Diagnosis 2	Diagnosis 3	Diagnosis 4	Diagnosis 5	Statistic	Standard error of statistic	Adjusted P-value of hospitalisation rate multiplier of last diagnosis	Relative 1 year post-trajectory hospitalisation rate multiplier of entire trajectory	Trajectory frequency	Median duration of trajectory (years)	Sex specificity
[truncated: 1,784 more rows]

[truncated: 9 more sheets: 11. M trajectory hosp risk, 12. F vs M mort, 13. F vs M hosp, 14. F unique high mort, 15. M unique high mort, 16. F unique high hosp, 17. M unique high hosp, 18. Female full triage, 19. Male full triage]
